# Supplementary material for: Marine Bioprospecting: Enzymes and Stress Proteins from the Sea Anemones Anthopleura dowii and Lebrunia neglecta
Source: Mar Drugs. 2023 Dec 23;22(1):12. doi: 10.3390/md22010012 (PMC10821040; doi:10.3390/md22010012)
Supplement: Supplementary file 1 [file marinedrugs-22-00012-s001.zip › Supplementary Material S1-S5.xlsx]

## Sheet: S1
											Putative components identificated in the crude extract in the proteome from Anthopleura dowii Verrill (1869) and Lebrunia neglecta Duchassaing & Michelotti, 1860.
		Total protein identified
						Quantitative Value (emPAI)						Percent Coverage						Exclusive Unique Spectrum Count						Exclusive Unique Peptide Count
		Refseq_Cnidaria				Anthopleura	Anthopleura	Anthopleura	Lebrunia	Lebrunia	Lebrunia	Anthopleura	Anthopleura	Anthopleura	Lebrunia	Lebrunia	Lebrunia	Anthopleura	Anthopleura	Anthopleura	Lebrunia	Lebrunia	Lebrunia	Anthopleura	Anthopleura	Anthopleura	Lebrunia	Lebrunia	Lebrunia	Tryptic peptide sequence		Anthopleura transcriptome		Uniprot				Gene Ontology (GO)
	Santos_20170717_Refseq_Cnidaria_20170801_AD1-3_LD1-3_SCAFF4	Identified Proteins (202)	Accession Number	Molecular Weight	T-Test (p-value): (p < 0.05)	AD1	AD2	AD3	LD1	LD2	LD3	AD1	AD2	AD3	LD1	LD2	LD3	AD1	AD2	AD3	LD1	LD2	LD3	AD1	AD2	AD3	LD1	LD2	LD3	Anthopleura	Lebrunia	Code	Sequence	Code	Name protein	Accession Number	Species	GO-Biological process	GO-Cellular component	GO-Molecular function
	1	Filamin-A-like [Exaiptasia pallida]	XP_020896073.1	349 kDa	0.00022	0.22401	0.24082	0.27989	0.52817	0.55275	0.50286	0.114	0.12	0.116	0.278	0.276	0.267	35	38	38	89	86	83	26	28	27	67	66	61	(K)QALLAWVK(S),(R)VDELSMMTYVSYFPEAK(L),(K)KPADFTVFXQGAGR(G),(K)VEQEVSVK(D),(R)APFTVDTR(G),(R)GAGDGELDVFVEGPLGEEK(V),(R)GAGDGELDVFVEGPLGEEKVDIK(N),(K)GAGIDSLGFAVEGPAQAEIK(C),(K)GAGEGGLGLTIEGPSEAK(I),(K)VKVEGPGIEPGIR(A),(K)VEGPGIEPGIR(A),(R)AGEPADIDIDTR(L),(K)VDVLPPTDASK(C),(R)AGPPFDASK(V),(R)DAGPGGLSLAIEGPSK(A),(R)LLLNGDNTLGVAFTPR(E),(R)DAGYGGLGLSIEGPSK(A),(K)AEINCVDNEDGTCSVDYLPTEPGK(Y),(R)GEFTVWT…	(K)QALLAWVK(S),(R)VDELSMMTYVSYFPEAK(L),(R)LGVTVFGPGK(V),(R)APFTVDTR(G),(R)GAGDGELDVFVEGPLGEEK(V),(K)GVAGKPCHFTVETK(G),(K)GAGIDSLGFAVEGPAQAEIK(C),(K)YAVHVTCGDDDIPK(S),(K)SPFMVPISPAGDASK(A),(K)GPGLEPQGICAGAPAEFTVFTK(D),(K)GAGEGGLGLTIEGPSEAK(I),(K)DLGDGSCDVDYWPNEPGDYMINILFADQHIPGSPFK(A),(K)VKVEGPGIEPGIR(A),(K)VEGPGIEPGIR(A),(R)AGEPADIDIDTR(L),(R)LAGDAPLEVTVVDELNSPVK(C),(R)LAGDAPLEVTVVDELNSPVKCDIEEEE…	c31886_g1_i1	MDPSRMDDFEMPDSDPTAADAEWKKIQQNTFTRWCNEHIKCVNQYIYNLETDLCDGLKLIALLQVLSHKKLPRHNKKPVFKSQKIENVSIALKFIEDENIRLVNIDASDIVKGNLKLILGLVWTLILKYQISMPYLEDDEDEGGGGSKMTPKQALLAWVKSKMPESVPMDNFTTHWNNGIAIACLVDAVAPGLLPECEDLDPKDRLQNAQQAMKLAQDWLDIPQVLDPADMVNPKVDELSMMTYVSYFPEAKLKPGAPLRPRVHPASKCYAKGPGIEPRGLVVKKPADFTVFTQGAGRGRLGVSVIGPGKVEQEVSVKDNEDHTYSCQYVPQKPGKYDVHVKWNGRHIPKSPFRVEVSSDLDAGKAYAKGPGLAPTGVVAGKYTDFTVFTKGAGEGKVT…	FLNA_MOUSE	Filamin-A	Q8BTM8	Mus musculus	Cellular component organization	Cytoskeleton	Actin binding
	2	Major antigen-like [Exaiptasia pallida]	XP_020895143.1	326 kDa	0.00029	0.042035	0.011431	0.026836	0.61397	0.76857	0.60478	0.0159	0.00673	0.0124	0.189	0.199	0.182	7	2	4	92	100	88	5	2	4	66	70	63	(K)SLLQSSEDEK(H),(R)YYEIETLYK(A),(K)INELENLLAR(V),(K)ISILEQQIR(D),(R)ERNEELEDELTVLQHR(I),(R)NEELEDELTVLQHR(I)	(K)LQMEIDNLK(R),(K)LQMEIDNLKR(Q),(R)LMDKETENEMLK(R),(K)ETENEMLK(R),(K)ETENEMLKR(E),(R)ADKIDLQK(R),(R)DALRDEIAVLQAK(L),(R)KYEASLINSQK(Q),(K)YEASLINSQK(Q),(K)KNSDLEDR(L),(R)VENGDLQR(E),(R)LKQLENEVSR(Y),(K)ISDLESLYEVTAK(E),(K)TNLAPLEK(R),(R)SENSRDDLER(Q),(K)NANLEAQLDAAQK(A),(K)TIDDMKNTIR(Q),(K)EMQADLNEANK(R),(K)EMQADLNEANKR(A),(K)DAFEKDATIEALK(S),(K)DATIEALK(S),(K)SLLQSSEDEK(H),(K)SLLQSSEDEKHK(L),(R…	Unidentified	Unidentified	CIP1_ARATH	COP1-interactive protein 1	F4JZY1	Arabidopsis thaliana	Response to stress	Cytoskeleton	Actin binding
	3	Actin, cytoplasmic-like [Exaiptasia pallida]	XP_020916414.1	42 kDa	0.002	3.9622	5.0006	4.1165	1.4731	1.6207	2.0598	0.622	0.628	0.593	0.572	0.521	0.593	27	30	26	20	20	23	16	17	16	15	14	15	(K)AGFAGDDAPR(A),(K)DSYVGDEAQSK(R),(K)IWHHTFYNELR(V),(R)VAPEEHPVLLTEAPLNPK(A),(R)EKMTQIMFETFNSPAMYVAIQAVLSLYASGR(T),(K)MTQIMFETFNSPAMYVAIQAVLSLYASGR(T),(R)DLTDYLMK(I),(R)GYSFTTTAER(E),(K)LCYVALDFEQEMQTAAASSSLEK(S),(K)SYELPDGQVITIGNER(F),(R)CPEAMFQPSFLGMESAGIHETTYNSIMK(C),(R)KDLYANTVLSGGSTMYPGIADR(M),(K)DLYANTVLSGGSTMYPGIADR(M),(K)EIANLAPPTMK(I),(R)KYSVWIGGSILASLSTFQQMWISK(Q),(K)YSVWIGGSILASLSTFQQ…	(K)AGFAGDDAPR(A),(R)AVFPSIVGRPR(H),(K)DSYVGDEAQSK(R),(K)IWHHTFYNELR(V),(R)VAPEEHPVLLTEAPLNPK(A),(K)MTQIMFETFNSPAMYVAIQAVLSLYASGR(T),(R)TTGIVMDSGDGVSHTVPIYEGYALPHAILR(L),(R)DLTDYLMK(I),(R)GYSFTTTAER(E),(K)LCYVALDFEQEMQTAAASSSLEK(S),(K)SYELPDGQVITIGNER(F),(R)KDLYANTVLSGGSTMYPGIADR(M),(K)DLYANTVLSGGSTMYPGIADR(M),(K)EIANLAPPTMK(I),(R)KYSVWIGGSILASLSTFQQMWISK(Q),(K)YSVWIGGSILASLSTFQQMWISK(Q)	c22293_g1_i1	MGDEEVAALVVDNGSGMCKAGFAGDDAPRAVFPSIVGRPKMPGIMVGMDQKDSYVGDEAQSKRGVLTLKYPIEHGIVTNWDDMEKIWHHTFYNELRVAPEEHPVLLTEAPLNPKANRERMTQIMFETFNVPAMYVAIQAVLSLYASGRTTGIVMDSGDGVSHTVPIYEGYALPHAILRLDLAGRDLTEYMMKILTERGYSFT	ACT_ACHBI	Actin	P26182	Achlya bisexualis	Unknown	Cytoskeleton	Nucleotide binding
	4	Filamin A- predicted protein [Nematostella vectensis]	XP_001639010.1	364 kDa	0.00049	0.25747	0.25857	0.31782	0.067398	0.07415	0.062079	0.112	0.123	0.118	0.0683	0.0716	0.0653	21	22	23	4	5	3	12	13	13	4	4	3	(K)QALLAWVK(S),(K)LAQDWLDIPQVLDPADMVNPK(V),(K)VDELSMMTYVSYFPEAK(L),(R)VEVSSDLDAGK(A),(K)GPGLAPTGVVAGK(Y),(R)APFTVDTR(G),(R)GAGDGELDVFVEGPLGEEK(V),(R)GAGDGELDVFVEGPLGEEKVDIK(N),(K)AYGPGLER(G),(K)GAGEGGLGLTIEGPSEAK(I),(K)GAGAGGLSLAIEGPSEAK(L),(K)FADEHIPGSPFTAK(A),(R)AGPPFDASK(V),(K)EPCEFTVVTR(D),(R)HVQNSPFSVMVQAQR(I),(K)DNTLGVSFVPVEPGEHK(I),(K)TLSAVFIPNETGEHIINVK(K),(K)HVTGSPFSVMVSGPGPADASK(V),(R)D…	(K)FIEDENIR(L),(K)QALLAWVK(S),(K)VDELSMMTYVSYFPEAK(L),(R)APFTVDTR(G),(R)GAGDGELDVFVEGPLGEEK(V),(K)AYGPGLER(G),(K)GAGEGGLGLTIEGPSEAK(I),(K)HVPGSPFK(V),(K)FADEHIPGSPFTAK(A),(R)AGPPFDASK(V),(K)EPCEFTVVTR(D),(R)DAGYGGLGLSIEGPSK(A),(K)AEINCVDNEDGTCSVDYLPTEPGK(Y),(R)DAGPGGLAIAVEGPAK(A),(K)EFGDHLVNVK(F),(K)MNCTENQDGTYQVTYYPVVAGEYTISIK(F),(R)AVLGQPNSFTVNASNAGR(G),(R)GSLMVGVEGPAIPAK(E),(K)HIPGSPFHVTV(-).	c31886_g1_i1	MDPSRMDDFEMPDSDPTAADAEWKKIQQNTFTRWCNEHIKCVNQYIYNLETDLCDGLKLIALLQVLSHKKLPRHNKKPVFKSQKIENVSIALKFIEDENIRLVNIDASDIVKGNLKLILGLVWTLILKYQISMPYLEDDEDEGGGGSKMTPKQALLAWVKSKMPESVPMDNFTTHWNNGIAIACLVDAVAPGLLPECEDLDPKDRLQNAQQAMKLAQDWLDIPQVLDPADMVNPKVDELSMMTYVSYFPEAKLKPGAPLRPRVHPASKCYAKGPGIEPRGLVVKKPADFTVFTQGAGRGRLGVSVIGPGKVEQEVSVKDNEDHTYSCQYVPQKPGKYDVHVKWNGRHIPKSPFRVEVSSDLDAGKAYAKGPGLAPTGVVAGKYTDFTVFTKGAGEGKVT…	FLNA_MOUSE	Filamin-A	Q8BTM8	Mus musculus	Cellular component organization	Cytoskeleton	Actin binding
	5	Fructose-bisphosphate aldolase C-like [Exaiptasia pallida]	XP_020893763.1	39 kDa	0.0071	0.45182	0.44087	0.25671	0.78151	0.85981	1.0465	0.214	0.214	0.169	0.331	0.322	0.339	7	7	4	13	13	15	6	6	4	10	10	10	(R)IAEAIVAPGK(G),(K)GILAADESTGTMGK(R),(K)ADDGTPFVK(I),(K)ENANVLAR(Y),(R)YATICQQNGLVPIVEPEVLCDGEHTLER(A),(R)ALQASALK(A).	(R)IAEAIVAPGK(G),(K)GILAADESTGTMGK(R),(K)DAISGVILFEETLYQK(A),(K)ADDGTPFVK(I),(R)ISDKTPSELAMK(E),(K)TPSELAMKENANVLAR(Y),(R)YATICQQNGLVPIVEPEVLCDGEHTLER(A),(R)AQTVTEAVLSHQYK(A),(K)KPWALTFSFGR(A),(R)ALQASALK(A).	c26015_g1_i1	MDAPLTPELKAELKRIAEAIVAPGKGILAADESTGTMGKRLANIGVENSEENRRQYRQLLFTSGPEMPKSISGVILFEETLYQKADDGTPFVKLIRDQGIIPGIKVDKGVVPLAGTVGEGTTQGLDGLSARCEQYKKDGCDFAKWRCVLKITDHTPSELAMKENANVLARYATICQQNGIVPIVEPEVLCDGEHTLERAQKVTEAVLSAQYKALVDHHVYLEGSLLKPNMVTPGQSCPNKSTPEQCARATVEALQRTVPTAVPGITFLSGGQSEEQASVHLNAINQYPGKKPWKLTFSFGRALQASALKAWVGKKENIKAGQAEFLKRAKANGEAAKGEYKGGASLAGDQSLFVANHQY	ALDOC_CARAU	Fructose-bisphosphate aldolase C	P53448	Carassius auratus	Metabolic process	Unknown	Lyase
	6	Protein disulfide-isomerase 2-like [Exaiptasia pallida]	XP_020900534.1	58 kDa	0.85	0.27714	0.2251	0.16462	0.19553	0.21512	0.28102	0.108	0.0923	0.0769	0.158	0.165	0.177	7	6	4	7	7	9	5	4	3	7	7	8	(R)ANQLPLVTEFSDETAPK(I),(K)QLAPIWDK(L),(K)MDSTANEVEGVK(V),(K)VQSFPTIK(F),(K)EGDVVDYNGGR(T)	(K)EVAVIGFFADK(E),(K)EVAVIGFFADKESEAAK(A),(R)NDYDGKYDADEIQK(F),(R)ANQLPLVTEFSDETAPK(I),(R)IMEFFGIQTK(E),(R)LINLADDDMTK(Y),(K)QLAPIWDK(L),(K)MDSTANEVEGVK(V),(K)EGDVVDYNGGR(T)	c27447_g1_i1	GKPSISGPYCWLIVLFLSLPSTEKSLLKTLSSNHSKMKPLVVLFLTYLALAHSEEIQEEEDVLVLTEKNFDEAIAANKHILVEFYAPWCGHCKALAPEYAKAAGQLKKEESPIKLAKVDATAQSKLGEKFQVQGYPTIKFFKDGKPSEYGGGRTHPEIVAWLNKKTGPPAKPLASAEEVQKFLEKEVAVVGFFKDQESDAAKAFLSAADGIDDVEFAIVSDAAIASEHKVDGDKIVLFKKFDEGRNDYDGEYEFEKIQKFVKANQLPLVTEFSDETAPKIFGGEVKHHILLFANKKSDDFKTHHDAFSASAKGFKGKVLFVFVNGEVEDNLRIMEFFGISAKDLPTVRLINLADDEMTKFKPESSDITTEVTSKFVQDFLDKKIKPHLLTQDVPADWDA…	PDI2_CAEEL	Protein disulfide-isomerase 2	Q17770	Caenorhabditis elegans	Protein folding	Endoplasmic reticulum	Isomerase
	7	78 kDa glucose-regulated protein-like [Exaiptasia pallida]	XP_020917618.1	75 kDa	0.0067	0.20514	0.16777	0.23265	0.098861	0.10876	0.10414	0.121	0.0962	0.133	0.105	0.104	0.104	7	6	7	5	5	5	6	5	6	5	5	5	(K)VGTVIGIDLGTTYSCVGVFK(N),(R)VEIIANDQGNR(I),(R)ITPSYVAFTPEGER(L),(K)VTHAVVTVPAYFNDAQR(R),(R)IINEPTAAAIAYGMDK(K),(K)ITITNDQNR(L),(K)ELEDVVQPIVSK(L).	(K)SQIFSTAADNQQTVTIQVFEGERPMTK(D),(K)FDLNNIPPAPR(G),(K)ITITNDQNR(L),(K)NELESYTYSLK(N),(K)KELEDVVQPIVSK(L).	c23602_g1_i1	MKYFSVVFTVALATSVLLVNGEEKKEEKKSEKEKVGTVIGIDLGTTYSCVGVFKNGRVEIIANDQGNRITPSYVAFTPEGERLIGDGAKNQLTSNPENTIFDIKRLIGRNWDDPSVKHDLKYFPFKVVEKNKKPHVQVSTSTGTKTFTAEEISAMVLGKMKETAEAYLGKKVTHAVVTVPAYFNDAQRQATKDAGVIAGLNVMRIINEPTAAAIAYGMDKKEGEKNILVFDLGGGTFDVSLLTIDNGVFEVVATNGDTHLGGEDFDQRVMEHFIKLYKKKKGKDIRKDNRAVQKLRREVEKAKRALSAQHQARIEIESFFEGEDFSEMLTRARFEELNMDLFKSTLKPVRKVLEDADLKKNEIQEIVLVGGSTRIPKVQQLVKDYFNGKEPSRGINPDE…	BIP_CHICK	Endoplasmic reticulum chaperone BiP	Q90593	Gallus gallus	Protein folding	Endoplasmic reticulum	Chaperone
	8	HSP-70. predicted protein [Nematostella vectensis]	XP_001629343.1	72 kDa	0.00099	0.4129	0.28124	0.37193	0.018792	0.020675	0.019796	0.179	0.203	0.197	0.0244	0.0244	0.0244	6	7	5	0	0	0	4	5	4	0	0	0	(K)VEIIANDQGNR(T), (R)IINEPTAAAIAYGLDKK(V), (K)STAGDTHLGGEDFDNK(M), (R)TLSSSTQASIEIDSLFEGIDFYTSITR(A), (K)SINPDEAVAYGAAVQAAILHGDKDDTVK(D), (R)GVPQIEVTFDIDANGILNVSAVDK(S), (K)NSLESYAYSMK(S), (K)FELTGIPPAPR(G).	unidentified	c27026_g1_i1	MAKAPAVGIDLGTTYSCVGVFQHGKVEIIANDQGNRTTPSYVAFTDTERLVGDPAKNQVAMNPINTVFDAKRLIGRRFEDPGVQDDMTHWPFQVISEGGRPKIRVEFKGETKTFFAEEISSMVLNKMKETAEAYLGTKVTDAVITVPAYFNDSQRQATKDAGVISGINVLRIINEPTAAAIAYGLDKKVGAERNVLIFDLGGGTFDVSILSIEEGIFEVKSTAGDTHLGGEDFDNKMVTHFVEEFKRKYKKNLTSNKRALRRLRTACERAKRTLSSSTQASIEIDSLFEGIDFYTSITRARFEELNSELFRKTKEPVEKSLRDAKLGKNEIHDIVLVGGSTRIPKIQSILREIFTDKELNKSINPDEAVAYGAAVQAAILSGDKHENVQDLLLLDVAPL…	HSP7D_MANSE	Heat shock 70 kDa protein cognate 4	Q9U639	Manduca sexta	Stress response	Nucleus	Nucleotide binding
	9	Alpha-enolase-like isoform X1 [Exaiptasia pallida]	XP_020909891.1	52 kDa	< 0.00010	0.49375	0.41933	0.41908	0.02606	0	0.027452	0.195	0.176	0.159	0.0314	0	0.0314	10	9	8	0	0	0	7	6	5	0	0	0	(R)AAVPSGASTGIYEALELR(D); (K)LGANAILGVSLAVCK(A); (K)TVILPVPAFNVINGGSHAGNK(L); (K)LAMQEFMLLPTGASSFR(E); (R)MGSEIYQNLK(K); (K)DGKYDLDFK(N); (K)VSIQIVGDDLTVTNPK(R); (K)ACNCLLLK(V)	unidentified	c30804_g1_i1	MANVTKVHAREIFDSRGNPTVEVEITTSKGMFRAAVPSGASTGIYEALELRDKEPGRFLGKGVKKAVDNVNSTIGPALISKALEVTDQKGIDEFMLQLDGTENKAKLGANAILGVSLAVCKAGAAHKGVPLYKYISELAGNKTVILPVPAFNVINGGSHAGNKLAMQEFMLLPTGASSFREAMRMGSEIYQNLKKVVKEKYGIDATNVGDEGGFAPNIQDNREGLELLKVAIEKAGYTGKIDIGMDVAASEFHKDGKYDLDFKNKNSDPSKWVTSEALRDIYLGFIKDYPVVSIEDAYDQDHWDAWTDLTGKVSIQIVGDDLTVTNPKRIQTAIDKKACNCLLLKVNQIGSVTESINACKLAQKNGWGVMVSHRSGETEDTFIADLVVGLCAGQIKTGA…	ENOA_HUMAN	Alpha-enolase	P06733	Homo sapiens	Metabolic process	Cytosol	Lyase
	10	Calmodulin beta. predicted protein [Nematostella vectensis]	XP_001638581.1	17 kDa	0.018	2.4302	1.4733	1.3168	3.2603	2.9143	3.4344	0.658	0.584	0.47	0.792	0.718	0.792	9	7	6	12	11	12	6	4	3	9	10	11	(K)EAFSLFDKDGDGTITTK(E),(R)SLGQNPTEAELQDMINEVDADGNGTIDFPEFLTMMAR(K),(K)MKDTDSEEEIR(E),(R)VFDKDGNGFISAAELR(H),(K)DGNGFISAAELR(H),(K)LTDEEVDEMIR(E),(R)EADIDGDGQVNYEEFVK(M)	(K)EAFSLFDK(D),(K)EAFSLFDKDGDGTITTK(E),(K)DGDGTITTK(E),(R)SLGQNPTEAELQDMINEVDADGNGTIDFPEFLTMMAR(K),(K)MKDTDSEEEIR(E),(K)DTDSEEEIR(E),(R)VFDKDGNGFISAAELR(H),(K)DGNGFISAAELR(H),(R)HVMTNLGEK(L),(K)LTDEEVDEMIR(E),(R)EADIDGDGQVNYEEFVK(M)	c18884_g1_i1	MADQLTEEQIAEFKEAFSLFDKDGDGTITTKELGTVMRSLGQNPTEAELQDMINEVDADGNGTIDFPEFLTMMARKMKDTDSEEEIREAFRVFDKDGNGFISAAELRHVMTNLGEKLTDEEVDEMIREADIDGDGQVNYEEFVKMMTSK	CALM_METSE	Calmodulin	Q95NR9	Metridium senile	Signal transduction	Unknown	Metal ion binding
	11	Vitellogenin 1. uncharacterized protein LOC110237419 [Exaiptasia pallida]	XP_020898659.1	168 kDa	< 0.00010	0	0	0	0.10711	0.11784	0.11283	0	0	0	0.057	0.057	0.057	0	0	0	12	12	12	0	0	0	7	7	7	unidentified	(R)GIANMLQIAPK(A),(K)AEEYHTFTPYSELGGK(V),(R)IVSELTVHLR(M),(R)QCYISYGALVNR(L),(R)MAIVELMLDR(Q),(K)MNVPQSYIPR(N),(R)GLCGDNNGEDYQELR(G).	unidentified	unidentified	VIT_ACITR	Vitellogenin	Q90243	Acipenser transmontanus	Lipid transport	Unknown	Nutrient reservoir activity
	12	Filamin-A-like isoform X1 [Orbicella faveolata]	XP_020621878.1	322 kDa	0.0012	0.095273	0.099673	0.11585	0.048292	0.05313	0.046011	0.0505	0.0502	0.0478	0.0328	0.0365	0.0298	5	4	4	1	1	0	4	3	3	1	1	0	(K)LIALLQVLSHK(K), (K)YTDFTVFTK(G), (K)FGGDHIPGSPFK(V), (K)CVAAGPGLER(G).	(K)YTDFTVFTK(G)	c31886_g1_i1	MDPSRMDDFEMPDSDPTAADAEWKKIQQNTFTRWCNEHIKCVNQYIYNLETDLCDGLKLIALLQVLSHKKLPRHNKKPVFKSQKIENVSIALKFIEDENIRLVNIDASDIVKGNLKLILGLVWTLILKYQISMPYLEDDEDEGGGGSKMTPKQALLAWVKSKMPESVPMDNFTTHWNNGIAIACLVDAVAPGLLPECEDLDPKDRLQNAQQAMKLAQDWLDIPQVLDPADMVNPKVDELSMMTYVSYFPEAKLKPGAPLRPRVHPASKCYAKGPGIEPRGLVVKKPADFTVFTQGAGRGRLGVSVIGPGKVEQEVSVKDNEDHTYSCQYVPQKPGKYDVHVKWNGRHIPKSPFRVEVSSDLDAGKAYAKGPGLAPTGVVAGKYTDFTVFTKGAGEGKVT…	FLNA_MOUSE	Filamin-A	Q8BTM8	Mus musculus	Actin cytoskeleton organization	Cytoskeleton	Actin binding
	13	Malate dehydrogenase, mitochondrial-like [Exaiptasia pallida]	XP_020897635.1	36 kDa	0.0058	0.40796	0.39807	0.67971	0	0	0	0.182	0.182	0.214	0	0	0	6	6	8	0	0	0	4	4	5	0	0	0	(K)VAVLGAAGGIGQPMSLLLK(Q); (K)VTSHQGPDELK(G); (R)DDLFNTNASIVQNLAEACAK(Y); (R)ILGVTTLDIVR(A); (R)IQNAGTEVVNAK(A)	unidentified	c26403_g1_i1	MLSRAVTRPQGVTTLARLSRQFSSTTQRQSKVAVLGAAGGIGQPMSLLLKQSPLVSHLALYDIVNTPGVAADLSHISTPAKVTSHQGPDELKVALEGCDIVAIPAGVPRKPGMTRDDLFNTNASIVQNLAEACAKYCPKAIICIIANPVNSTVPIASEVYKKAGVYDPERILGVTTLDIVRANTFVAEAKGLNVNDVSVPVIGGHSGVTILPLLSQATPKMSFTQEETEKLTDRIQNAGTEVVNAKAGAGSATLSMAYAGNQFIASVLEALSGKAGVVQCAFIKSDETDASYFATPLELGKNGVTKNLGMGQLSEYETKKLEEVLPELKKNIAKGEAFVNK	MDHM_PIG	Malate dehydrogenase, mitochondrial	P00346	Sus scrofa	Metabolic process	Mitochondrion	Oxidoreductase
	14	Ras-related protein Rab-7a [Exaiptasia pallida]	XP_020907141.1	23 kDa	0.91	0.92063	0.71281	1.0441	0.803	1.0767	0.8459	0.429	0.38	0.429	0.517	0.551	0.517	7	6	7	8	9	8	7	6	7	8	9	8	(K)VIILGDSGVGK(T),(K)ATIGADFLTK(E),(R)LVTMQIWDTAGQER(F),(R)FQSLGVAFYR(G),(K)TLDSWRDEFLIQASPR(D),(R)DPENFPFVVLGNK(I),(K)EAINVEQAFQTIAK(N).	(K)VIILGDSGVGK(T),(K)ATIGADFLTK(E),(R)LVTMQIWDTAGQER(F),(R)FQSLGVAFYR(G),(R)GADCCVLVFDVTQPNTFK(T),(K)TLDSWRDEFLIQASPR(D),(R)DPENFPFVVLGNK(I),(K)NNIPYFETSAK(E),(K)EAINVEQAFQTIAK(N).	c20951_g1_i1	MASRKKVLLKVIILGDSGVGKTSLMNQYVNKKFSNQYKATIGADFLTKEVMVDDRLVTMQIWDTAGQERFQSLGVAFYRGADCCVLVFDVTQPNTFKTLDSWRDEFLIQASPRDPENFPFVVLGNKIDLENRAVSAKRAQAWCHSKNDIPYFETSAKEAINVEQAFQTIAKNALAQETDVELYNDFPDQIKLSNDSKQKSDGCPC	RAB7A_RAT	Ras-related protein Rab-7a	P09527	Rattus norvegicus	Autophagy	Lysosome	Hydrolase
	15	Chitinase3- like. uncharacterized protein LOC110054708 [Orbicella faveolata]	XP_020616724.1	175 kDa	0.0017	0.13182	0.11583	0.091598	0.023524	0.025881	0.024781	0.0839	0.0661	0.0445	0.0223	0.0223	0.0178	11	10	7	3	3	3	9	8	5	3	3	3	(K)TQIAVGGWTHEEK(D), (R)LLLTAAVAAGLWTIK(G),(R)GVmFWAIDLDDFSGQHcGQGK(Y), (R)GVMFWAIDLDDFSGQHcGQGK(Y), (R)FTLLcNELR(A), (R)VcYYTNWSQYRPK(G), (K)TGHHTAmGPEGDKLTLPFAIWYWmNNR(D), (R)DTWEKPGIR(N), (K)IVLGLGTYGR(A),(K)YTGAEGFLAYFEIcK(M).	(K)FGFDGLDLDWEYPGmR(G), (K)IVLGLATYGR(A), (R)FTLLcNELR(A).	unidentified	unidentified	CHI10_DROME	Probable chitinase 10	Q9W5U2	Drosophila melanogaster	Metabolic process	Extracellular region	Hydrolase
	16	Probable chitinase 10 [Exaiptasia pallida]	XP_020902099.1	107 kDa	0.001	0.2809	0.201	0.23362	0.039106	0.028248	0.041195	0.0901	0.089	0.0787	0.0404	0.0238	0.0352	12	9	9	3	2	3	7	6	6	3	2	3	(R)VCYHTNWSQYR(Q),(K)INQNNELAMYEWNDDKLYPR(F),(K)VFIDSVIR(V),(R)LLLTAAVSAGK(N),(K)IALGLGTYGR(S),(K)IGQILDLINLMAYDLR(G),(K)IVLGLGTYGR(A),(K)GLAGAMFWALDLDDFSGQSCGKGNYPLMNAVK(K).	(K)ILDLINLMAYDLR(G),(K)IALGLGTYGR(S),(R)NELAMYEWNDDKLYPR(F).	unidentified	unidentified	CHI10_DROME	Probable chitinase 11	Q9W5U3	Drosophila melanogaster	Metabolic process	Extracellular region	Hydrolase
	17	Heat shock cognate 71 kDa protein-like [Exaiptasia pallida]	XP_020917426.1	71 kDa	0.041	0.292	0.14402	0.20561	0.081395	0.089549	0.085744	0.112	0.094	0.112	0.0971	0.074	0.0971	7	3	5	4	4	4	4	2	4	4	4	4	(K)APAVGIDLGTTYSCVGVFQHGK(V),(K)VEIIANDQGNR(T),(K)DAGVIAGINVMR(I),(R)IINEPTAAAIAYGLDK(K),(R)IINEPTAAAIAYGLDKK(V),(K)SINPDEAVAYGAAVQAAILHGDK(D),(K)FELTGIPPAPR(G)	(R)IINEPTAAAIAYGLDK(K),(R)GVPQIDVTFDVDANGILNVSAVDK(S),(K)NSLESYAYNMK(Q),(K)QTIEDDKVK(D),(K)EIEQVCSPVITK(L)	c27026_g1_i1	MAKAPAVGIDLGTTYSCVGVFQHGKVEIIANDQGNRTTPSYVAFTDTERLVGDPAKNQVAMNPINTVFDAKRLIGRRFEDPGVQDDMTHWPFQVISEGGRPKIRVEFKGETKTFFAEEISSMVLNKMKETAEAYLGTKVTDAVITVPAYFNDSQRQATKDAGVISGINVLRIINEPTAAAIAYGLDKKVGAERNVLIFDLGGGTFDVSILSIEEGIFEVKSTAGDTHLGGEDFDNKMVTHFVEEFKRKYKKNLTSNKRALRRLRTACERAKRTLSSSTQASIEIDSLFEGIDFYTSITRARFEELNSELFRKTKEPVEKSLRDAKLGKNEIHDIVLVGGSTRIPKIQSILREIFTDKELNKSINPDEAVAYGAAVQAAILSGDKHENVQDLLLLDVAPL…	HSP7D_MANSE	Heat shock 70 kDa protein cognate 4	Q9U639	Manduca sexta	Stress response	Nucleus	Nucleotide binding
	18	Actin, cytoplasmic like. predicted protein [Nematostella vectensis]	XP_001637076.1	42 kDa	0.0004	5.1248	5.4398	5.8119	1.6218	1.9608	2.4688	0.675	0.68	0.709	0.517	0.547	0.568	8	7	6	4	4	6	3	3	3	2	2	2	(K)AGFAGDDAPR(A),(K)DSYVGDEAQSK(R),(K)IWHHTFYNELR(V),(R)VAPEEHPVLLTEAPLNPK(A),(R)EKMTQIMFETFNSPAMYVAIQAVLSLYASGR(T),(K)MTQIMFETFNSPAMYVAIQAVLSLYASGR(T),(R)TTGIVMDSGDGVTHTVPIYEGYALPHAILR(L),(R)DLTDYLMK(I),(R)GYSFTTTAER(E),(K)LCYVALDFEQEMQTAASSSSLEK(S),(K)SYELPDGQVITIGNER(F),(R)CPEAMFQPSFLGMESAGIHETTYNSIMK(C),(R)KDLYANTVLSGGSTMYPGIADR(M),(K)DLYANTVLSGGSTMYPGIADR(M),(R)KYSVWIGGSILASLSTFQQMWISK(Q),(K…	(K)AGFAGDDAPR(A),(R)AVFPSIVGRPR(H),(K)DSYVGDEAQSK(R),(K)IWHHTFYNELR(V),(R)VAPEEHPVLLTEAPLNPK(A),(K)MTQIMFETFNSPAMYVAIQAVLSLYASGR(T),(R)TTGIVMDSGDGVTHTVPIYEGYALPHAILR(L),(R)DLTDYLMK(I),(R)GYSFTTTAER(E),(K)SYELPDGQVITIGNER(F),(R)KDLYANTVLSGGSTMYPGIADR(M),(K)DLYANTVLSGGSTMYPGIADR(M),(R)KYSVWIGGSILASLSTFQQMWISK(Q),(K)YSVWIGGSILASLSTFQQMWISK(Q),(K)QEYDESGPSIVHR(K)	c30882_g1_i1	MEDEVAALVVDNGSGMCKAGFAGDDAPRAVFPSIVGRPRHQGVMVGMGQKDSYVGDEAQSKRGILSLKYPIEHGIVTNWDDMEKIWHHTFYNELRVAPEEHPVLLTEAPLNPKANREKMTQIMFETFNSPAMYVAIQAVLSLYASGRTTGIVFDSGDGVSHTVPIYEGYALPHAILRLDLAGRDLTDYLMKILTERGYSFTTTAEREIVRDIKEKLCYVALDFEQEMQTAASSSTLEKSYELPDGQVITIGNERFRCPESLFQPAFLGMESAGIHETCYNSIMKCDVDIRKDLYANTVLSGGSTMYPGIADRMQKEIANLAPPTMKIKIIAPPERKYSVWIGGSILASLSTFQQMWISKQEYDESGPSIVHRKCF	ACTA_STRPU	Actin, cytoskeletal 1A	P53472	Strongylocentrotus purpuratus	Unknown	Cytoskeleton	Nucleotide binding
	19	EGF and laminin G domain-containing protein-like [Exaiptasia pallida]	XP_020893090.1	131 kDa	0.018	0.014539	0.028724	0	0.053893	0.085118	0.10747	0.00943	0.0172	0	0.0609	0.0678	0.0995	1	2	0	5	7	9	1	2	0	5	6	9	(R)DIISGANFK(G),(R)GRFEGCISGVK(V).	(R)FHSVEIQFR(G),(K)YPPEEGSKPESVIR(D),(R)DIMYKPNFISAQTVALASEYCR(Q),(K)HNYWWGGSGPDHPGK(C),(R)GDCIGGGNYWCNCDASR(D),(R)GILFHQGDK(T),(R)VDVWFNIK(E),(K)EVIIGSTGR(G),(R)GRFEGCISGVK(V),(K)VKEETVEPIK(W).	c31850_g1_i1	MARIVVTLLLWSSCLIPFSLAADTEGYFDGNAYAEYLLHRKPVKSSTNTIKLSFRTVQPNGLLLHGDSTGDEFGDYFTLELIGGKLRFALSFGRHQGIDDMRNITLGDELADNRYHSVVIEHNGRETWLKLDTTTKGEKHRRIETRYKELYLDDFFFIGGAHDFRRLRDIISGANFKGCMKGVEFNDRKLLQSLGGDATTLRKYGVKDNCPAEIDYTPITLNGRSSQFSTSINPRSNELKGRLKFRTYKNKGTLLSQAKSDGKGFELSYQPEAVELKVYIKDSPTTVSVRQVFKYRTVDKGMWHDVDFEISAARISLTVNTINDKRPPGSDFPQNFFTGSALVGGEFTGCIWDLTLNGGKFDPNTQKNNPDIQIDVCNITDFCFPSICKNFGKCSQDGK…	ELP_ACRMI	EGF and laminin G domain-containing protein	B8UU78	Acropora millepora	Unknown	Membrane	Unknown
	20	Glutamate dehydrogenae like. uncharacterized protein LOC110241264 [Exaiptasia pallida]	XP_020902796.1	49 kDa	0.00015	0.27692	0.32629	0.31404	0.088268	0.097111	0.092984	0.0933	0.0933	0.0933	0.0644	0.0578	0.0644	6	7	6	3	3	3	5	5	5	3	3	3	(R)FHPTVNLSILK(F),(K)FLGFEQVLK(N),(R)EIGFLFGQYK(R),(R)IRNEFTGVLTGK(G),(R)NEFTGVLTGK(G).	(K)FLGFEQVLK(N),(K)KNSLTTLPMGGGK(G),(R)EIGFLFGQYK(R),(K)LAFVMELK(N),(K)YNCEFHEGK(R).	c27917_g1_i1	MMLRVLNRRGVSVLSRVGIVRCVSTTTPTLAQATDKSKDKEQYKFTSIDGFMDFVAKKNPGELEFHQAVHEVVTSIWDHLSENPYYNKHNVLERIVEPERVVIFRVPWRDDKGQINVNKGYRVEFNSAIGPYKGGLRFHPTVNLSILKFLGFEQVLKNSLTTLSMGGGKGGSNFDPKGKSDSEVMSFCQSFMSELQRHIGPNRDVPAGDIGVGGREIGFLFGQYKRLRNEFTGVLTGKGIAWGGSLVRPEATGYGLLYFVNEMLTNKGQSLKDKIITVSGSGNVAQYAVEKALELGGKVVSLSDSNGTVYDPNGIDKAKLAYVMELKNVKRGRIKEYAAKYNVEYHEGKRPWSIKCDIALPCATQNELNKSDAEMLVKNGCTLVGEGANMPTEPEAIKV…	DHE4_PRERU	NAD(P)-specific glutamate dehydrogenase	P95544	Prevotella ruminicola	Metabolic process	Cytoplasm	Oxidoreductase
	21	Protein singed-like [Exaiptasia pallida]	XP_020902867.1	54 kDa	0.093	0.074058	0.15365	0.17858	0.21359	0.19515	0.30846	0.05	0.05	0.05	0.14	0.108	0.179	2	4	4	7	6	8	2	2	2	6	5	7	(K)WNIGLVNHASR(Y),(K)FSLEFHQTNLAFR(D).	(K)WNIGLVNHASR(Y),(R)YLTVETFGFK(L),(K)GNLCCEATER(E),(K)YAIVASNNK(Y),(K)FSLEFHQTNLAFR(D),(K)YLTAVGTGR(L),(K)ETVTKDELFVIEDSHPQCSFIGCNDR(R),(K)SPNGCYLK(G).	c30379_g1_i2	MPETAKWNIGLVNHASRYLTVETFGFTLNADGTSLRKKQMWVLEQDSDEGVYFKCHLGRYLTADPKGNLACEATEREPNARFTIVTKDGKWALKSAHNEYFGATGDQLKCVAKIGKTELWTVHLAMHPQVNLKSVLRKRYAHLDEASQDIKVSEIIPWGADAMVTLKFVDGSYAIVASNDKYLQSNGDLSDELTDECKFSIEFHQTNIAFRDHKGKYLTAVGPGRLQSKKDTVTKDELYILEDSHPQCSFIGHSDRRISIKQSMDVTANQAEMTDTEIFQVIFNKENNKVSFLSNNEKYWVANGGVATASSSEITPKAEFELEWHGNQIAFKANSGKYLTSKANGQLLDGTDEVSATGLFTVELVNRPLLVLRGEFGFVGCKGTTNRLECNRANYDVFH…	FSCN1_HUMAN	Fascin	Q16658	Homo sapiens	Cell migration	Cytoskeleton	Actin binding
	22	Transaldolase-like [Exaiptasia pallida]	XP_020909935.1	36 kDa	0.01	0.32298	0.39653	0.46087	0.22787	0.19139	0.18326	0.158	0.195	0.195	0.176	0.124	0.127	5	6	6	5	4	4	4	5	5	4	3	3	(K)YKPTDGTTNPSLLLAASK(M),(R)LSFDVEGSIAK(A),(K)LSSTWEGIQAAR(I),(K)SVTAIYNYYK(K),(R)WLLNEDAMATEK(L)	(K)TFTTVVADTGDIQAIGK(Y),(K)YKPTDGTTNPSLLLAASK(M),(K)LSSTWEGIQAAR(I),(K)SVTAIYNYYK(K)	c21742_g1_i1	MVLPIPRLSWLLLRCLSTNISWKMLCSSGKKNGSTVEEQVTAAMDKLYVSFGTEILKIIPGRVSTEVDARLSFDVEGSIAKAKKFIELYKQQGIGKERVLIKLSSTWEGIQAARILEKENGIHCNLTLLFSFAQAVACAEAGVTLISPFVGRILDWFVKNTNQKYEPQDEPGVKSVTAIYNYYKKFGYKTVVMGASFRNTGEIVELAGCDNLTISPSLLEKLQNSKETVTRKVSVEEAQKLEITKVELDEKKFRWLLNEDAMATEKLAEGIRKFAADSVKLEDMIKEQLQAS	TALDO_MOUSE	Transaldolase	Q93092	Mus musculus	Metabolic process	Cytoplasm	Transferase activity
	23	Calmodulin-like [Exaiptasia pallida]	XP_020915374.1	35 kDa	0.00059	0	0	0	0.43567	0.32551	0.45895	0	0	0	0.211	0.185	0.218	0	0	0	8	6	8	0	0	0	5	4	4	unidentified	(K)GMMKVDEFK(S),(R)LTNNDIEQMISVLDPAK(K),(R)LTNNDIEQMISVLDPAKK(G),(K)MFDKDGDGTIDTDELEEVMK(S),(K)SIGEKPSR(K),(K)ELEDMINDVDKDGLGYIK(F).	unidentified	unidentified	CALL3_RAT	Calmodulin-like protein 3	Q5U206	Rattus norvegicus	Signal transduction	Unknown	Metal ion binding
	24	Calreticulin-like [Exaiptasia pallida]	XP_020900968.1	52 kDa	0.036	0.16269	0.11534	0.041981	0.22132	0.202	0.23314	0.0697	0.0697	0.0494	0.196	0.175	0.196	4	3	1	7	6	7	3	2	1	6	5	6	(K)NLHGDSPYMIMFGPDICGPGTK(K),(K)KVHVIFNYK(G),(K)VHVIFNYK(G).	(K)FYGDAEKDK(G),(K)FEKPFSNEGK(D),(K)HEQNIDCGGGYAK(I),(K)NLHGDSPYMIMFGPDICGPGTK(K),(K)KPEDWDDKK(Q),(K)KPEDWDDEIDGEWEAPMIDNPDYK(G).	c23438_g1_i1	MFLHRLVLLSLVSYVFSTDYFVEKFEDKSWEDRWVQSTKKGAEAGKFLLTAGKFYGDAEKDKGIKTSEDARFYAVSSKFDKPFSNEGKDLVIQFTVKHEQNIDCGGGYIKVFSSDLDQKNMHGDSPYLIMFGPDICGPGTKKVHVIFNYKGKNLLTKKEIRCKDDEMTHLYTLIVKSDNTYEVRIDGEKVESGELEQDWDFLPPKKIKDPEAKKPEDWDDNKKIDDPEDKKPEDWDKPQNIPDPDAKKPEDWDDEIDGEWEPPMIDNPEYKGEWKPKQIDNPNYKGEWVHPEIDNPDYSEDKDLYLYKDIGAVGFDLWQVKAGTIFDNVLVTDSVESSEEYAKEFEKTKEGEKKMKDKQDEEDRKKQEEEDKKKKEEEDSKKKEEEDEEDEEEAEDKKD…	CALR_MOUSE	Calreticulin	P14211	Mus musculus	Protein folding	Cytoplasm	Chaperone
	25	Gelsolin-like protein 1 isoform X1 [Exaiptasia pallida]	XP_020908549.1	42 kDa	0.019	0.095822	0.044982	0.10867	0.19028	0.16091	0.15407	0.0786	0.0352	0.0596	0.127	0.127	0.127	2	1	2	5	4	4	2	1	2	4	4	4	(K)DSNLALFGSDLEK(N),(K)TVELDTFLDDKPVQHR(E),(K)GGADTGFNR(V)	(K)KDPNSEELSYDVHFWIGK(E),(K)DPNSEELSYDVHFWIGK(E),(K)ESTQDEYGTAAYK(T),(K)TVELDTFLDDKPVQHR€	c22668_g1_i1	MSGLRKAKKYDWKDSNLALFGSDLEKNIKKESAKGEPAWKNAGTKVGLQIWRIVNFKVVDWPKSKYGQFYDGDSYIILNTYKKDPSSDALSYDVHFWIGRYSTQDEYGTAAYKTVELDTLLDDKPVQHRQVMNHESDLFKSYFKEIIYLNGGADSGFNIETPESYKPRLLEFRKVDNKMYVTEKPLKKSSMSNGDVYLIDMGLTVIQWNGKESSPFERIEAQKLQQKLESDRNGKVKSEQLDEQDINNLDESLKNVIPDGDAPPDEEPPRGRQPFEKVLNRLSDSSGQLKFTEVSRGSGVKRSQLSSDDVFILETQTECFVWTGKGASIEERKKCMQYAHHYIQRSVNPFNPITVVKEGNESDNFNRAF	GELS1_LUMTE	Gelsolin-like protein 1	Q7JQD3	Lumbricus terrestris	Cellular component organization	Cytoskeleton	Actin binding
	26	Disulfide isomerase 2. uncharacterized protein LOC110243164 [Exaiptasia pallida]	XP_020904893.1	148 kDa	0.00064	0	0	0	0.057715	0.07491	0.082895	0	0	0	0.0387	0.0455	0.0683	0	0	0	6	7	8	0	0	0	5	6	7	unidentified	(K)NDPPVLLAK(V),(K)HGVSGYPTLK(I),(K)VHGLAGHMTQDNQDQFNKPLCVVYYNVDYK(L),(K)VMNYAIAK(S),(K)FLQXYFDGK(L),(K)LKDVEDIVIAK(M),(K)VEGFPTIYWAPK(N),(R)EVSDFITFLK(S).	unidentified	unidentified	PDIA3_HUMAN	rotein disulfide-isomerase A3	P30101	Homo sapiens	Oxidation-reduction process	Endoplasmic reticulum	Isomerase
	27	Gelsolin-like protein 1 [Orbicella faveolata]	XP_020605066.1	18 kDa	0.9	0.24297	0.10829	0.27555	0.28216	0.18859	0.18058	0.191	0.0855	0.204	0.191	0.191	0.191	1	1	2	1	1	1	1	1	2	1	1	1	(K)KDPSSEELDYDVHFWIGK(Y), (K)YSTQDEYGTAAYK(T), (K)TVELDTFLDDKPVQHRE	(K)YSTQDEYGTAAYK(T), (K)TVELDTFLDDKPVQHRE	c22668_g1_i1	MSGLRKAKKYDWKDSNLALFGSDLEKNIKKESAKGEPAWKNAGTKVGLQIWRIVNFKVVDWPKSKYGQFYDGDSYIILNTYKKDPSSDALSYDVHFWIGRYSTQDEYGTAAYKTVELDTLLDDKPVQHRQVMNHESDLFKSYFKEIIYLNGGADSGFNIETPESYKPRLLEFRKVDNKMYVTEKPLKKSSMSNGDVYLIDMGLTVIQWNGKESSPFERIEAQKLQQKLESDRNGKVKSEQLDEQDINNLDESLKNVIPDGDAPPDEEPPRGRQPFEKVLNRLSDSSGQLKFTEVSRGSGVKRSQLSSDDVFILETQTECFVWTGKGASIEERKKCMQYAHHYIQRSVNPFNPITVVKEGNESDNFNRAF	GELS1_LUMTE	Gelsolin-like protein 1	Q7JQD3	Lumbricus terrestris	Cellular component organization	Cytoskeleton	Actin binding
	28	Spectrin alpha chain, non-erythrocytic 1-like [Exaiptasia pallida]	XP_020904938.1	279 kDa	0.61	0.049369	0.034009	0.023442	0.04531	0.027053	0.015362	0.0373	0.0327	0.0245	0.0431	0.0286	0.0137	7	5	3	9	5	3	6	5	3	9	5	3	(R)ITYINDLADQLAEEGHPDIELISLK(Q),(K)HQAFEAELNANR(N),(R)SAEQLEAWMATR(E),(R)NVDDEESWIK(E),(K)NTLVGSDDYGDTLAAVQGLLK(K),(K)TGYLDYQEFK(S)	(R)DADEVETWINEK(L),(K)EAIATVEELGR(D),(K)VTALGQEAGR(L),(R)LQEIHPENAEEISAK(Q),(R)EKEPIASSTNTGR(D),(K)DVASAEALIDR(H),(R)DSTFQAYDEFGR(E),(R)VADIESAGNK(L),(K)QEAFLADDNLGDSLDSVEALIK(K),(K)EHYASPDIQEK(L).	c32142_g1_i1	MTAVQAREIPILETVEDIQERREHVLRRYADFKDAARVRRRRLEDAKRYFQFKRDADEVEAWINEKLQIACDENYRDPTNLQDKLQKHQAFEAEISAHSYAITELQTTGEEMISESHYASELIRERLDSLIKLWELLLCKSAEKGRMLLFAQKRVHYLREVEEVMSWIHEKEAIATVEELGRDLEHVIVLQKKFDDFFKDLQANESRITYINDLADQLAEEGHPDIELISLKQREVNEAWERLKRLALLRKEKLESAQEIHNFYRDADETKNWINEKDKVLSSDDYGKDLASVNALLRKHEAMERDLAAVEDKVTALGQEAGRLQEIHPENADEVSAKHDEIVSAWGNLKDKSDVRKARLEDSYRLQRFIGDFRDHMSFINEMKVLIVSDELAKDVAGA…	SPTN1_HUMAN	Spectrin alpha chain, non-erythrocytic 1	Q13813	Homo sapiens	Cellular component organization	Cytoskeleton	Actin binding
	29	Peroxiredoxin-2-like isoform X1 [Exaiptasia pallida]	XP_020917834.1	27 kDa	0.00083	0.15252	0.14882	0.17297	0.41405	0.35612	0.34098	0.0741	0.0741	0.0741	0.267	0.226	0.226	2	2	2	6	5	5	2	2	2	5	4	4	(R)GLFIIDDK(G),(R)LIQAFQFTDK(H).	(K)GGIGQINLPILSDLTK(Q), (R)DYGVLLEDAGVALR(G),(R)GLFIIDDK(G),(R)LIQAFQFTDK(H).	c23742_g1_i2	MAARLIGRLAPQLKQICTRNITLSKPQNAAPLYHFTRRMLSLSRAAEMSKAVIQKPAPPFAGTAVNKQGEFIDIKLSDYKGKYVVLFFYPLDFTFVCPTEIIAFSNRVEEFKAINCEVIACSVDSQYSHLAWTNVPRKKGGIGTINMPILSDLTKQISKDYGVLLEDQGVALRGLFIIDDKGILRQITVNDLPVGRSVDETLRLIQAFQFTDKHGEVCPAGWRPGSDTIVPEPGKSDKYFSKAN	PRDX4_BOVIN	Peroxiredoxin-4	Q9BGI2	Bos taurus	Cell redox homeostasis	Cytosol	Oxidoreductase activity
	30	Superoxide dismutase [Cu-Zn]-like [Exaiptasia pallida]	XP_020895630.1	16 kDa	< 0.00010	0.12749	0.1244	0.14459	0.69263	0.76202	0.72964	0.0533	0.0533	0.0533	0.247	0.247	0.247	1	1	1	5	5	5	1	1	1	3	3	3	(K)TTGHAGGR(L)	(R)HVGDLGNIVAGADK(V),(R)SVVVHVGEDDLGR(G),(R)LACGVIGIAK(-).	unidentified	unidentified	SODC_HALRO	Superoxide dismutase [Cu-Zn]	P81926	Halocynthia roretzi	Cellular detoxification	Cytoplasm	Antioxidant activity
	31	Chitotriosidase-1-like [Exaiptasia pallida]	XP_020909717.1	50 kDa	0.0077	0.22017	0.21483	0.24969	0.12019	0.13223	0.059273	0.115	0.115	0.115	0.13	0.13	0.0508	4	4	4	2	2	0	3	3	3	2	2	0	(K)TLLAVGGWNHENYNSPFSR(M),(R)LLLTAAVAAGK(A),(K)IALGLGTYGR(A),(R)ESGFLAYYEICK(M)	(K)ILDLINLMAYDLR(G),(K)IALGLGTYGR(A),(R)ESGFLAYYEICK(M),(K)GLAGAMFWAIPLDDFSGNFCGQGR(Y)	unidentified	unidentified	CHIT1_HUMAN	Chitotriosidase-1	Q13231	Homo sapiens	Metabolic process	Extracellular region	Chitinase activity
	32	Vinculin-like [Exaiptasia pallida]	XP_020892500.1	97 kDa	0.87	0.061397	0.081241	0.12005	0.074686	0.082168	0.096039	0.053	0.053	0.0657	0.068	0.0714	0.0933	3	4	5	5	5	6	2	2	3	4	4	5	(K)TIESILDPVAQQVSQLVIFHEEGEDGR(A),(K)AVGAAVANLVK(V),(R)GILSGTSALLLTLDEAEVR(K).	(K)TIESILDPVAQQVSQLVIFHEEGEDGR(A),(R)AKDWIGDATCDASGLGEK(A),(K)KPATSFAGK(M),(K)MEQAQQWLQNPSGDHTGIGER(A),(R)NVQDLISPLAIEAK(S),(K)YMRDEEEGQPHSK(K)	c30299_g1_i1	MPVFHTKTIESILDPVAQQVSQLVIFHEEGEDGRAMPDLSTPIKAVGAAVANLVKVGQQTATNSKDKILRQEMPLAFTRVEESSTFLVEAAMILKNDPYSSVARKKLIDGARGILSGTSALLLTLDEAEVRRILHVCKSLLEYFPVAEMVEEMTDLVTFVTNLTPGTTSLAKQVEERAEELTHHEHRDILKSCIGKVKHLVPLLISAMKAFVKTPLGAGRAEAQENRNFIITKICAEITEIMRVLQLTSTEENKGDDPLYDMKKAMSVFDSKFDKAREWLGEPTCDAGGLGDQAVRECIQQGRDMASVCQDPQKNKIQRCCDDLDQLMSELETLRSQGKGTTPRGLELSREIDKQLGVLRNLMDEAIHHQGISGTKKPANTFVGKMEQVQQWLANPSGD…	VINC_DROME	Vinculin	O46037	Drosophila melanogaster	Cell adhesion	Membrane	Actin binding
	33	Alpha actin 1. predicted protein [Nematostella vectensis]	XP_001633290.1	103 kDa	0.0012	0.18873	0.20797	0.13596	0	0	0	0.0938	0.0938	0.0837	0	0	0	9	10	6	0	0	0	7	7	6	0	0	0	(K)MTLGMIWTIILR(F), (K)DGLLLWCQR(K), (K)AAPFNNWLESAR(E), (R)NINEVENQILTR(D), (K)QCLVSLGYNIK(E), (K)VTFQAFVDFMTR(E), (R)ETADSDTAEQVMESFR(I), (R)AVMTYVSSYYHALTSSQQADTAAK(R)	unidentified	c29371_g1_i1	MAEDEQEYYGYYYGEEDKGLLDPAWEKQQKKTFTAWCNSHLRKLGKTIETMEEDFRDGVCLLLLLESLSGDKLTAERGRLRFHRIANVNKALDFVASKGVKLVSIGAEEIVDGNLKMTLGMIWTIILRFAIQDIAIDDAFAKDGLLLWCQRKTAPYKNVKVTNFHTSFKDGLAFCALIHRHRPDLIEYEKLKKDDPMTNLNTAFDVAEQHLDIPKMLDPEDMIENERPDERAVMTYVSSYYHALTSSQQADTAAKRIGKVLTINRDNEKMMEDYETLASDLLDWINKTIPRFQNRETDGSLADMQKKLEELRNYRGGEKPPKVEDKGALETNFNTLQTKLRLSNRPAFLPTEGRMINDVNDAWGKLEAAEKDFEDWLLIEMRRMERLAHLVNKFKHKCD…	ACTN1_CHICK	Alpha-actinin-1	P05094	Gallus gallus	Cellular component organization	Membrane	Actin binding
	34	Ribokinase-like [Exaiptasia pallida]	XP_020909259.1	34 kDa	0.0027	0.11792	0.11506	0.13373	0.30313	0.40916	0.31932	0.0708	0.0708	0.0708	0.215	0.24	0.215	2	2	2	6	7	6	1	1	1	5	6	5	(K)NANVTTVFNPAPASPWLDIQFYR(L)	(K)FSMGFGGK(G),(K)GANQCVMASR(L),(K)VGDDTFGR(N),(K)NANVTTVFNPAPASPWLDIQFYR(L),(R)LSDVFCANESEAELLTGVPVK(T),(K)AVVMLLER(G).	c28955_g1_i1	MAADKGPFDVVVVGSCMTDLVSYVPRLPKAGETITGTKFSMGFGGKGANQCVMASRLGAKTAMIAKVGDDTFGRNHIQNFKHNKVNVDNVSTTTQAFTGVAPISVNSSGENSITIVSGANEYLEDADIKRARSAIVSSAVVVCQLEIQPQITQLALALAKNANVTTVFNPAPASPWLDIQFYRLSDIFCANESEAELLTGIPVKSIDDAEKVVVMLLERGAGKVVITLGAKGSVIGTQENPIPQHIPVTPVEATDTTGAGDAFIGALAFYLAKFKNLSFQEMVRRSNEVARTTVFKRGTQTSFPTRDSLPPSFFSNTNSSDNKSIR	RBSK_MOUSE	Ribokinase	Q8R1Q9	Mus musculus	Phosphorylation	Cytoplasm	Kinase activity
	35	Death-associated protein kinase 3-like [Exaiptasia pallida]	XP_020893050.1	38 kDa	0.17	0.10655	0.049816	0.18926	0.16401	0.18044	0.22576	0.0749	0.0419	0.0419	0.132	0.132	0.132	2	1	3	4	4	5	2	1	1	4	4	4	(R)ANEEDAAFVMR(Q),(K)IVHLDVRPANILVK(K)	(K)NMLEFLGEKPR(A),(R)ANEEDAAFVMR(Q),(K)IVHLDVRPANILVK(K),(K)LIDYGCAR(K)	c14394_g1_i1	MSNLAAKKFGPQTMELKKESPDNSYQIKAEVARGKYAVIKRCMDKKTKKNMMAKLIKYDSDTEKLAIQEFEIMRDLKNDKLLTARDGFHVRKYVIIMMDGVEAKNVLEFLGEKPRANEEDAAFVMRQTLDALKYLHGQKIVHLDVRPANILVKKDYTLKLIDYGCARRIKNDTGDLVDAIGVTEFAAPELLNVDPVCWAADMWSIGVMMYILLSATLPFTSEDEDEITQAVTAVDYEMPADKFGKATDEAKNLIKKCLVRVPEKRPTAVQVLEGDWLSNNNSQRRKTSDIPATKFKELNQALQDADKEEAVTASCTLRTFKEEEYESPDEDEE	DAPK3_RAT	Death-associated protein kinase 3	O88764	Rattus norvegicus	Apoptotic process	Cytoplasm	Kinase activity
	36	Catenin alpha-2-like [Exaiptasia pallida]	XP_020911078.1	142 kDa	0.69	0.055777	0.026595	0.03091	0.071303	0.032099	0.030735	0.0341	0.0248	0.0155	0.0813	0.0325	0.0325	4	2	2	7	3	3	3	2	1	7	3	3	(R)VDEVVTAEMENYQK(G),(R)YWSSAEIRPR(Y),(R)YRGPAIVAQIIPTPAAQAGQIK(I),(R)GPAIVAQIIPTPAAQAGQIK(I)	(K)AVVDNISDAFLETNLPLLMMIEAAK(A),(R)NIHSLAPQVVNAAR(T),(K)VALENMAVFK(D),(R)VDEVVTAEMENYQK(G),(K)GSMAFAGCTGPTPR(Y),(R)YWSSAEIRPR(Y),(R)MVLMATQGTTGTAVNDAK(G)	c31918_g1_i1	MSRTAYQASGDVKLEHQKVKWDPKTLEIRTHSVEKALEPLVHQVTTLVNQPKKKGTRVGKSKNAHKLAQDIEDATVRLIKTGETIAQDFPEIRDEMLAACKDCRGAGDTMRFAAKEFADDPCSSSKRANMIRAARALLSAVTRLLCVADMADVYRLLASLKLVERRLKDLEGVNNTADLLNSFKSLGNDLMDLAKLSGKRQADLKDPLRRDEMAAARAKLKDASKMLLSSSKAYVRHPDVGSAKANRDFVIQQMNEAVRSISGTAQATGPSQPHPMEMPGALAAALDDFDSQLAMDPASYSEKRTRPSLEDRLEKIISGAAKLADSVCTRDHTRDNIIAECNAVRQALQNLLSEYMSHSSGKKKHAPGGPLDQAIENMCNKTRNLRGQLNKAVVDNISD…	CTNA2_PONAB	Catenin alpha-2	Q5R416	Pongo abelii	Cell adhesion	Cytoskeleton	Actin binding
	37	Myosin-2 essential light chain-like [Exaiptasia pallida]	XP_020917237.1	19 kDa	0.27	0.36636	0.52073	0.41548	0.37651	0.41423	0.27228	0.227	0.227	0.227	0.233	0.273	0.163	3	4	3	4	4	3	3	3	3	4	4	3	(K)IDYDQIGDVLR(S),(R)SLGLNPTAGEVK(K),(R)VSFEEFLPIYHSAFQK(K)	(R)EAFSLFDR(K),(K)IDYDQIGDVLR(S),(R)SLGLNPTAGEVK(K),(R)VSFEEFLPIYHSAFQK(K)	c17273_g1_i1	MSTLSDDQIGEYREAFTLFDRKGDNKIDYDQIGDVLRSLGLNPTAGEVKKIEKDVGKKRVSFEEFLPIYHSAFQKKANPSLEEFIEGFRVFDRDGTGTVQAAELRNLLTTLGEKLSDEDVNTLFATVDDNSGYINYEDFVKVIITA	MLC2_DROME	Myosin-2 essential light chain	P54357	Drosophila melanogaster	Actin filament-based movement	Myosin complex	Metal ion binding
	38	Ras-related Rab-2. predicted protein [Nematostella vectensis]	XP_001628750.1	24 kDa	0.0057	0.70665	0.86726	1.008	0.38591	0.13727	0.21135	0.245	0.307	0.382	0.245	0.127	0.132	6	7	7	5	2	3	5	6	6	4	2	2	(K)YIIIGDTGVGK(S),(R)FQPVHDLTIGVEFGAR(M),(K)LQIWDTAGQESFR(S),(R)GAAGALLVYDITR(R),(R)DTFNHLTTWLEDAR(Q),(K)TAANVEEAFINTAK€	(K)YIIIGDTGVGK(S),(K)LQIWDTAGQESFR(S),(R)DTFNHLTTWLEDAR(Q),(K)TAANVEEAFINTAK€	c19136_g1_i1	MSYAYLFKYIIIGDTGVGKSCLLLQFTDKRFQPVHDLTIGVEFGARMITIDGKQIKLQIWDTAGQESFRSITRSYYRGAAGALLVYDITRRDTFNHLTTWLEDARQHSSSNMVIMLIGNKSDLEARRDVKKEEGEAFAREHGLIFMETSAKTAANVEEAFINTAKEIYQKIQEGVFDINNEANGIKLGPQHSPSNPSVPLGGSRSQDSGGCC	RAB2_LYMST	Ras-related protein Rab-2	Q05975	Lymnaea stagnalis	Protein transport	Golgi apparatus	Nucleotide binding
	39	Uncharacterized protein LOC110236688 [Exaiptasia pallida]	XP_020897889.1	56 kDa	0.0022	0.070402	0.033374	0.038789	0.16761	0.18441	0.14282	0.0372	0.0372	0.0372	0.0838	0.0838	0.0838	2	1	1	6	6	5	1	1	1	4	4	4	(K)VPATGTYSIEAAGASGGYDK(F)	(K)GKHECDSPSGFCK(D),(K)HECDSPSGFCK(D),(K)GQDHEGQVSVNK(G),(K)VPATGTYSIEAAGASGGYDK(F).	c28511_g1_i1	ISLHIWATSDTITMTRLILSLAFCCIVGFTQGFFLGGNDKDSIGIPVQIDKLGFRQDPKVYSHLVIPPWSRPFKPGYCMSWEWNTDKRYRDQRLAICQELTKGKHECDSPGGCRDKCPFSNGTYPYWRLRNAEDVPFLWVISSLQMYETPFSNKPLTSDPSRGYASSYFGPGYKPSNAFDNNQDTLWISNGAAPPGMQWIAFEFDRPVFVGSIRMALEEEKPERSPSMVYVEASCEKYFRNFVTMWVINNQRRESDKRYSVFGQAKFTTLGANGRLGPVSVGSNYKGQDHEGKVNVNKGVQMWKVPATGTYSIEAAGASGGYDKFSAGSGKFKGRGSRVKGNFKLKKGDVLKILVGQEGGNNPSSGGAGGGGGTFVVKEDNTPMIIAGGGGGVDKLKGE…	ALK_MOUSE	ALK tyrosine kinase receptor	P97793	Mus musculus	Phosphorylation	Membrane	Kinase activity
	40	Calmodulin-like isoform X2 [Exaiptasia pallida]	XP_020915341.1	17 kDa	0.00054	0.11625	0.11343	0.13184	1.0536	1.1592	1.4163	0.112	0.112	0.112	0.625	0.618	0.638	1	1	1	7	7	8	1	1	1	7	7	8	(K)EADTDGDGTVNYEEFIK(M)	(K)LTEEEIAEFK(E),(K)EAFMVFDKDGDGTVTIQELGTVMR(N),(K)DVDKDGSGCIDFDEFLK(L),(K)GVSYEDELK(A),(K)QVLDNLGER(L),(R)LSEEEVGEMIK(E),(R)LSEEEVGEMIKEADTDGDGTVNYEEFIK(M),(K)EADTDGDGTVNYEEFIK(M).	c13463_g1_i1	MVDSLTEEEIAEYKDAFSLFDKDGDGTVTISELGTVMRNLGQNPTEEEIKEMIKDVDEDGSGCIDFNEFLELMAKKTKGTSYEDELKAAFKIFDADGNGSITVQELKQVLDNLGERLTEEEVGEMIKEADTDGDGTVNYEEFIKMMLAMSGGGK	CALM_HETTR	Calmodulin	A8I1Q0	Heterocapsa triquetra	Signal transduction	Unknown	Metal ion binding
	41	Prolyl endopeptidase-like isoform X2 [Exaiptasia pallida]	XP_020895488.1	135 kDa	< 0.00010	0	0	0	0.063368	0.069716	0.066753	0	0	0	0.0609	0.0617	0.06	0	0	0	6	6	6	0	0	0	6	6	6	unidentified	(K)VFLDPNKLSDDGTTALAGR(T), (K)LSDDGTTALAGR(T), (K)ADGTETDSNLDQK(L), (K)QNLLVLGYLHDVK(S), (K)SVLHLHSLETGXR(L), (K)LIEEYSDIFAFIAR(N).	unidentified	unidentified	PPCE_HUMAN	Prolyl endopeptidase	P48147	Homo sapiens	Proteolysis	Cytoplasm	Peptidase activity
	42	Cytochrome c [Exaiptasia pallida]	XP_020906641.1	12 kDa	0.62	0.65048	0.36889	1.1339	0.70541	1.1239	0.7431	0.327	0.227	0.327	0.255	0.418	0.327	3	2	4	4	5	4	3	2	3	3	5	3	(K)TGPNLHGLFGR(K),(K)GITWGEDTLWIYLENPK(K),(R)ADLIAYLK(E).	(M)PEIPQGDATK(G),(K)TGPNLHGLFGR(K),(R)KTGQAPGFSYTSANQNK(G),(K)TGQAPGFSYTSANQNK(G),(K)GITWGEDTLWIYLENPKK(Y),(R)ADLIAYLK(E).	c25315_g1_i1	MSVPAGDATKGAKVFKQKCAQCHTVEKGGKHKTGPNLHGLFGRKTGQAHGFSYTTANQNKGITWGEDTLWIYLENPKKYIPGTKMVFAGLKKKTERADLIAYLKESTSS	CYC_PECGU	Cytochrome c	Q6QLW4	Pectinaria gouldii	Electron transport	Mitochondrion	Metal ion binding
	43	Probable protein disulfide-isomerase A6 [Exaiptasia pallida]	XP_020895514.1	48 kDa	0.00073	0.040241	0	0	0.20238	0.26917	0.25773	0.0386	0	0	0.145	0.145	0.198	0	0	0	6	7	7	0	0	0	4	4	6	unidentified	(K)VGAVDMDVHQSVGGPYNIR(G),(K)LGAVDATVHTVLGSR(Y),(R)YQVQGYPTIK(V),(R)SVEDYQGGR(T),(R)WGWLWSEAGAQPK(L),(K)LEEAFEVGGFGYPALVAVNSR(K).	unidentified	unidentified	PDIA6_RAT	Protein disulfide-isomerase A6	Q63081	Rattus norvegicus	Protein folding	Endoplasmic reticulum	Isomerase activity
	44	Gelsolin-like protein 1 [Orbicella faveolata]	XP_020605062.1	24 kDa	0.035	0.2768	0.16824	0.31391	0.37435	0.41185	0.39435	0.0773	0.0773	0.0773	0.203	0.203	0.203	3	2	3	4	4	4	1	1	1	2	2	2	(K)TVELDTFLNDKPVQHR(E).	(K)DSNLSLFGSDLEK(N), (K)ESTQDEYGTAAYK(T), (K)TVELDTFLNDKPVQHR(E).	c10141_g1_i1	MSGLQKAKKYDWKDSNLALFGSDLEKNVKKESAKGEPAWEGAGTKVGLQVWRIVKFKVTHWPKEDYGKFFNGDSYIVLHTYKKDPDSEELSYDVHFWIGKRSSQDEYGTAAYKTVELDTFLNDKPVQHREVQNHESDLFKS	GELS1_LUMTE	Gelsolin-like protein 1	Q7JQD3	Lumbricus terrestris	Cellular component organization	Cytoskeleton	Actin binding
	45	Catalase-like [Exaiptasia pallida]	XP_020893863.1	57 kDa	0.0078	0.033467	0	0.037954	0.16349	0.14558	0.2436	0.0314	0	0.0314	0.153	0.126	0.185	1	0	1	6	5	8	1	0	1	5	4	6	(K)GGGAFGYFEVTHDITK(Y)	(K)GGGAFGYFEVTHDITK(Y),(R)FSTVGGESGSADTVR(D),(R)DPILFPSFIHTQK(R),(R)ATQLAGSDPDYSNR(D),(K)SPYNPFDLTK(I),(K)NYFAEIEQSAFNPASMVPGIEASPDK(M).	unidentified	unidentified	CATA_HUMAN	Catalase	P04040	Homo sapiens	Metabolic process	Cytoplasm	Catalase activity
	46	Radixin-like [Exaiptasia pallida]	XP_020900767.1	67 kDa	0.1	0.028693	0.057364	0.066671	0.13732	0.070136	0.091765	0.0159	0.0442	0.0442	0.106	0.0655	0.0814	1	2	2	6	3	4	1	2	2	6	3	4	(K)IAQDLEMYGVNYFDIK(N),(K)IGFPWSEIR(N)	(K)QLFDQVIK(T),(R)EIWFYGLSYEDEK(G),(K)IAQDLEMYGVNYFDIK(N),(K)KAPDFIFFTAR(L),(K)APDFIFFTAR(L),(R)RKPDTIEVQQMR(K).	c30582_g1_i3	MPKSINVKVTTVDAELEFAIQSSTTGKQLFDQVVKTIGIREIWYFGLQFTDSKGYTAWLKLNKKVTAQDVKKESPLQFRFLVKFYPEDVSEEIIQNITTKLFFLQVKEGILNDSIYCPAETSVLLASYACQGKYDDYDEDKAKNLLKDKLLAQRVLDQHKLSKEEWANKIATWWKEHGDLMPIEAMMEYLKIAQDLEMYGVNYFDIKNKKGTDLVLGVDALGLNVYEKTDKLTPKIGFPWSEIRNISFNDKKFVIKPIDKKAPDFVFFTERLRINKRILALCMGNHEMYMRRRKDDTIEVQQMKSQSKEERASTVAEREKTKEEKKKTERKARELEETLEKYKGLTAKLREQEEEMKALDEKHQQSLLQLQQEMEAKNSDRDRMMEENQTLLIKLQDSQ…	MOES_BOVIN	Moesin	Q2HJ49	Bos taurus	T cell proliferation	Cytoskeleton	Actin binding
	47	Spectrin beta chain-like isoform X1 [Exaiptasia pallida]	XP_020898735.1	275 kDa	0.015	0.0069183	0.0067505	0.0078459	0.046059	0.027491	0.026322	0.0051	0.0051	0.0051	0.0472	0.0306	0.0336	1	1	1	9	5	5	1	1	1	8	5	5	(K)LILLLEILSGEK(L),(R)VHLENIGAHDIVDGNQK(I),(K)SIITYVSAYYHYFAK(M).	(K)HRPDLIDYEK(I),(K)DLDDFQVWLR(N),(R)LANEGHYAQDK(I),(R)GKDEASANDMLK(R),(R)SQDIGQDLAQVELLIEK(F),(R)VAATNALCDQLIGTGHSDAATIAEWK(D),(K)DGINESWANLLELIETR(K),(K)MGEELLAK(N).	c32124_g1_i2	MSVEIDVKHPLDRPSTDLLEVSRHRLEGLPTHMEDRDADVMRAFIDSMGTMGEVTADFSQVHGSEEEWMEQQSSARLFERSRIKVLADERERVQKKTFTKWINSHLQRVGARVNDLYHDLQDGRKLILLLEILSGEKLPKPSKGRMRIHNLENVEKCLVFLKKQRVHLENIGAHDIVDGNQKITLGLIWTIILRFQIQDIMIEGETKERRSAKDALLLWCQSKTVGYRNVTITNFTTSWRDGLAFNAIIHKHRPDLIEFEKINKVDAEQNLEQAFEVAETQLGITPLLDAEDVMVDFPDEKSIITYVSAYYHYFAKMKTVEVSGTRIGKVIERIKENEELINEYEKLATDLLEWIEMRIQTLADRDFANTLVGVQQQMLEFNQYRTQEKPPRFVEKGNL…	SPTB2_MOUSE	Spectrin beta chain, non-erythrocytic 1	Q62261	Mus musculus	Cellular component organization	Cytoskeleton	Actin binding
	48	Peptidyl-prolyl cis-trans isomerase FKBP2-like [Exaiptasia pallida]	XP_020909341.1	16 kDa	0.022	0.12381	0.26712	0.14041	1.1677	0.52418	0.93967	0.104	0.201	0.104	0.59	0.438	0.535	1	2	1	7	4	6	1	2	1	7	4	5	(K)GWDQGLLNMCEGEK(R),(K)IPGGATLIFEVELLK(I)	(K)GDSLHMHYTGTLEDGTK(F),(K)FDSSVDRK(E),(R)KEPFXFTLGVGQVIK(G),(K)EPFXFTLGVGQVIK(G),(K)GWDQGLLNMCEGEK(R),(K)LVIPSDLGYGDSGAPPK(I),(K)IPGGATLIFEVELLK(I).	c36785_g1_i1	MRILTVSLIVVVLALFVLETQAEKKAKTKKLQIGIKKRVKDCKQKSAKGDSLHMHYTGKLEDGTEFDSSIPRGEPFIFTLGTGQVIKGWDQGLLNMCEGEKRKLVIPSDLGYGDRGAPPKIPGGATLIFEVELLKIVKQDKSDL	FKBP2_HUMAN	Peptidyl-prolyl cis-trans isomerase FKBP2	P26885	Homo sapiens	Protein peptidyl-prolyl isomerization	Endoplasmic reticulum	Isomerase activity
	49	Thioredoxin domain-containing protein 3 homolog [Exaiptasia pallida]	XP_020901988.1	39 kDa	0.44	0.29347	0	0	0.20705	0.17456	0.16714	0.0977	0	0	0.115	0.0891	0.115	4	0	0	5	4	4	3	0	0	4	3	3	(R)TFIMVKPDGVQR(G),(R)GLVGEIIK(R),(R)VMLGETNPADSKPGTIR(G),(R)GDFCVHIGR(S).	(R)TFIMVKPDGVQR(G),(R)FMSSGPVVAMVWEGVGVVK(T),(R)GDYSIHIGR(N).	c23425_g1_i1	MALPSRLASQFRSSASLIRNGVTRRAFSSQSAGKSRSMFGNAAPFLIGATAATSTLLAAKYFYDNKHKYTVLQPVHAAARIVNKSERTFIMVKPDGVQQGLVGEIIKRFEQKGFKLVAMKFVHANEDHLRKHYEDLKALPFFPGLVKFMSSGPVVAMVWEGNGVVKTGRVMLGETNPADSKPGTIRGDFCVHIGRNIIHGSDSVESANKEIDLWFDKKELVDWKPNYYKFVYEDEN	NDK_CHICK	Nucleoside diphosphate kinase	O57535	Gallus gallus	Apoptotic process	Cytoplasm	Kinase activity
	50	Acidic mammalian chitinase-like [Exaiptasia pallida]	XP_020902061.1	47 kDa	0.0068	0.18112	0.28462	0.2054	0.059599	0.06557	0.062783	0.0703	0.096	0.0703	0.0328	0.0328	0.0328	4	6	4	2	2	2	3	4	3	2	2	2	(R)VCYFTNWAQYR(D),(K)YGFDGLDLDWEYPAHR(G),(R)FTVLCQELLDAFK(R),(R)FTVLCQELLDAFKR(H).	(R)FTVLCQELLDAFK(R),(R)FTVLCQELLDAFKR(H).	unidentified	unidentified	CHIT1_HUMAN	Chitotriosidase-1	Q13231	Homo sapiens	Metabolic process	Extracellular region	Chitinase activity
	51	Peptidyl-prolyl cis-rans isomerase B-like.predicted protein [Nematostella vectensis]	XP_001626713.1	22 kDa	0.033	0.44307	0.30049	0.34925	0.21727	0.23903	0.22888	0.118	0.118	0.118	0.158	0.158	0.158	4	3	3	1	1	1	2	2	2	1	1	1	(R)IEIGLFGK(A),(K)LQHYGAGWLSMANAGK(D)	(K)FTVLCQELLDAFK(R).	c10977_g1_i1	ILFTSSEQISRNSFLQNPVQNMNFLAFLSVFTLFVVAVNASKDVLVTKKVFFDITIGGKKAGRIEIGLFGKTVPKTAKNFFELATHEKGFGYKGSTFHRVIKDFMIQGGDFTNGDGTGGKSIYGEKFADENFKLQHYGAGWLSMANAGKDTNGSQFFITTTKTPWLDGRHVVFGKVVSGMDVVRKIENSKTNHSDKPTSEVKIADSGSLPVDKPFEVTMDDAQ	PPIB_CHICK	Peptidyl-prolyl cis-trans isomerase B	P24367	Gallus gallus	Protein folding	Endoplasmic reticulum	Isomerase activity
	52	Beta-hezosaminidae. uncharacterized protein LOC110250538 [Exaiptasia pallida]	XP_020912807.1	98 kDa	0.00013	0.10457	0.12453	0.11859	0	0	0.01454	0.0698	0.0953	0.0953	0	0	0.0163	5	6	5	0	0	0	4	5	5	0	0	0	(K)LHLHLTDDEGWR(L); (K)VVMTQATHLYFDHPYEPDPEER(G)	Unidentified	Unidentified	unidentified	A7RSQ4_NEMVE	Beta-N-acetylhexosaminidase	A7RSQ4	Nematostella vectensis	Metabolic process	Membrane	Beta-N-acetylhexosaminidase activity
	53	HSP70predicted protein [Nematostella vectensis]	XP_001622423.1	71 kDa	0.0015	0.37308	0.24639	0.37547	0	0	0	0.135	0.133	0.136	0	0	0	6	6	5	0	0	0	4	4	3	0	0	0	(K)APAIGIDLGTTYSCVGVFQHGK(V), (K)VEIIANDQGNR(T), (K)TFFAEEISSMVLNK(M), (K)DAGVISGLNVLR(I), (R)IINEPTAAAIAYGLDKK(V), (K)ELEGVCNPIITK(L), (K)SINPDEAVAYGAAVQAAILHGDK(S)	Unidentified	c27026_g1_i1	MAKAPAVGIDLGTTYSCVGVFQHGKVEIIANDQGNRTTPSYVAFTDTERLVGDPAKNQVAMNPINTVFDAKRLIGRRFEDPGVQDDMTHWPFQVISEGGRPKIRVEFKGETKTFFAEEISSMVLNKMKETAEAYLGTKVTDAVITVPAYFNDSQRQATKDAGVISGINVLRIINEPTAAAIAYGLDKKVGAERNVLIFDLGGGTFDVSILSIEEGIFEVKSTAGDTHLGGEDFDNKMVTHFVEEFKRKYKKNLTSNKRALRRLRTACERAKRTLSSSTQASIEIDSLFEGIDFYTSITRARFEELNSELFRKTKEPVEKSLRDAKLGKNEIHDIVLVGGSTRIPKIQSILREIFTDKELNKSINPDEAVAYGAAVQAAILSGDKHENVQDLLLLDVAPL…	HSP7D_MANSE	Heat shock 70 kDa protein cognate 4	Q9U639	Manduca sexta	Stress response	Nucleus	Nucleotide binding
	54	Ras-related protein Rab1A. predicted protein [Nematostella vectensis]	XP_001632230.1	23 kDa	0.024	0.18544	0.18094	0.097938	0.30303	0.44951	0.55798	0.107	0.107	0.0537	0.224	0.327	0.41	2	2	1	4	5	6	2	2	1	4	5	6	(K)LLLIGDSGVGK(S),(K)LQIWDTAGQER(F).	(K)LLLIGDSGVGK(S),(K)LQIWDTAGQER(F),(R)GAHGIIVVYDVTDQESFNNVK(Q),(R)YACENVNK(L),(K)EYAESLGVPFLETSAK(N),(K)NATNVEQAFMTMAAEIK(N).	c23411_g1_i1	MSTMNPEYDYLFKLLLIGDSGVGKSCLLLRFADDTYTESYISTIGVDFKIRTIELDGKTIKLQIWDTAGQERFRTITSSYYRGAHGIIVVYDVTDQESFNNVKQWLQEIDRYACENVNKLLVGNKCDLTTKKVVDFTTAKEYAESLGVPFLETSAKNATNVEQAFMTMAAEIKNRMGPSPSAQGPGSNVKINSSSPVKPSSGGCC	RAB1A_LYMST	Ras-related protein Rab-1A	Q05974	Lymnaea stagnalis	Protein transport	Golgi apparatus	Nucleotide binding
	55	Programmed cell death 6-interacting protein-like [Exaiptasia pallida]	XP_020896864.1	93 kDa	0.1	0.11079	0.08496	0.072763	0.078163	0.032623	0.047685	0.0455	0.0455	0.0359	0.0611	0.0263	0.0587	5	4	3	4	2	3	3	3	2	4	2	3	(R)GGVATIDTLMQDLPELLQR(N),(K)FYNDLTPILLR(F),(K)ISDLVFAR(K).	(K)NTFSEEILNENADAIADLNK(L),(R)ISFTWYDAFDK(G),(K)GLYGENVAR(M),(K)FYNDLTPILLR(F).	c29983_g1_i1	MAGWIVIPSKRTEAVDFKKPLEKFIKNTFSEEVLNENSDAIAELNKLRNTAVMQVPDKHEAALQPLLRYYDQLVAMEGKLPISESQIRVSFSWYDAFDKGSLFGSKKASISSSAYERLCLLYNIGALQSQIASSQNLHSEDGIKLAAKLFQNASGCFQMLKDSVFPQLHQVPTPDMSIEMLNALSSVMLAQGQEAIWHKTEKDNMKSAVIAKVAAQTSDLYREANQACQVSSVRQQLEKEWIAVLGAKQNYFLAIANYHQGLVAKDKGAYGENVARMKLAKDLSESAQKESLGLFETKAWLDRIKRTHAEADKDNNLIYHDMIPSNDKMAVIGRAALAKQLPLSKPASDNFMDMFPKLVPMAVHNALVAYESRKAEIINMEVGRLREGTQLINSVLASL…	PDC6I_XENLA	Programmed cell death 6-interacting protein	Q9W6C5	Xenopus laevis	Protein transport	Extracellular region	Unknown
	56	Neurocalcin homolog [Exaiptasia pallida]	XP_020893734.1	22 kDa	0.27	0.19163	0.30228	0.21733	0.69933	0.24046	0.33139	0.109	0.176	0.124	0.378	0.176	0.259	2	3	2	7	3	4	2	3	2	7	3	4	(K)LKPEELADLR(N),(K)IYGNFFPYGDASK(F),(K)LSLAEFIEGAK(S).	(R)NATQFNEQELQEWYK(G),(K)IYGNFFPYGDASK(F),(R)EFICALSVTSR(G),(R)QEMLEIVTAIYK(M),(K)MPEDESTPEK(R),(K)MPEDESTPEKR(T),(K)LSLAEFIEGAK(S).	c21860_g1_i1	MGKQNSKLKPEELADLRNATQFNEQELQEWYKGFLKDCPSGHLSVEEFKKIYGNFFPYGDASKFAEHVFRTFDQNGDGTIDFREFICALSVTSRGKLEQKLKWAFNMYDLDGNGYISRQEMLEIVKAIYKMVGSVMKMPEDESTPEKRTDKIFRQMDKNVDGKLSLAEFIEGAKSDPSIVRLLQCDQSAGAAQ	NECX_APLCA	Neurocalcin	Q16982	Aplysia californica	Unknown	Unknown	Metal ion binding
	57	Triosephosphate isomerase-like [Exaiptasia pallida]	XP_020915468.1	27 kDa	0.0012	0.072159	0.07041	0.081834	0.10808	0.11891	0.11386	0.0607	0.0607	0.0607	0.121	0.101	0.121	1	1	1	2	2	2	1	1	1	2	2	2	(K)VVIAYEPVWAIGTGK(T)	(K)VVIAYEPVWAIGTGK(T),(K)TATPQQAQEVHQQLR(G),(R)IIYGGSVNAK(N)	c13561_g1_i1	SILALLPRSFPSCSADRISRFSLCFLFLSFLLQKPRNKIMGRKFFVGGNWKMNGSKAKIDEILKNLHDSSLSAETEVVISPPALYLSYVRSSAKPEIGVAAQNCYKVASGAFTGEISPEMVKDLSCEWVILGHSERRNVFGENDELIGEKVSHALANDVKVIACIGELLAEREAGKTTEVVFRQIKAIADKVSDWSKVVIAYEPVWAIGTGKTATPQQAQEVHHQLRDWVKKNVSAVVAEGIRIIYGGSVNAKNCRELGAEPDIDGFLVGGASLKPEFVQIVNARL	TPIS_CULTA	Triosephosphate isomerase	P30741	Culex tarsalis	Metabolic process	Unknown	Isomerase activity
	58	Peptidyl-prolyl cis-trans isomerase B-like [Exaiptasia pallida]	XP_020904785.1	24 kDa	0.0017	0	0	0.090623	0.36991	0.30357	0.29067	0	0	0.0357	0.246	0.21	0.21	0	0	1	5	4	4	0	0	1	5	4	4	(R)IVIGLFGK(S)	(K)VFFDITIGGEK(S),(R)IVIGLFGK(S),(K)HYGPGYLSMANAGK(D),(K)DTNGSQFFITTVK(T),(K)ILEGMDVVR(K)	c18453_g1_i1	MVSRRMLPTGSLLKIMKALTVAGIVVGVIVFLLRPNESVAKTKKGPLVTSKVFFDIEIGKKPAGRIVIGLFGKTVPKTARNFEVLATGEKGFGYKGSLFHRVIKDFMIQGGDFVNKDGTGGRSIYGDRFDDENFKLKHYAAGYLSMANAGKDTNGSQFFITAVKTSWLDGKHVVFGKVLEGMGVVRKIENTALSGSKPVKDCTIVDSGTLPVDKPFNIEKE	PPIB_RAT	Peptidyl-prolyl cis-trans isomerase B	P24368	Rattus norvegicus	Protein folding	Endoplasmic reticulum	Isomerase activity
	59	Polyubiquitin C. predicted protein [Nematostella vectensis]	XP_001624503.1	26 kDa	0.45	0.25756	0.1572	0.1827	0.18171	0.19992	0.11973	0.148	0.109	0.109	0.135	0.166	0.0786	3	2	2	3	3	2	3	2	2	3	3	2	(K)TITLEVEPSDTIENVK(A),(R)TLSDYNIQK(E),(K)ESTLHLVLR(L)	(K)TITLEVEPSDTIENVK(A),(K)IQDKEGIPPDQQR(L),(K)ESTLHLVLR(L)	c11211_g1_i1	MQIFVKTLTGKTITLEVEPSDTIENVKTKIQDKEGIPPDQQRLIFAGKQLEDGRTLSDYNIQKESTLHLVLRLRGGVIEPSLRLLAQKYNCEKMICRKCYARLHPRATNCRKKKCGHSNNLRPKKKLK	RL40_DROME	Ubiquitin-60S ribosomal protein L40	P18101	Drosophila melanogaster	Translation	Ribosome	Structural constituent of ribosome
	60	Myosin heavy chain, striated muscle-like isoform X1 [Exaiptasia pallida]	XP_020901361.1	223 kDa	0.12	0.017203	0.016786	0.0096842	0.02463	0.041245	0.019318	0.017	0.017	0.0129	0.0216	0.0345	0.0216	2	2	1	4	6	3	2	2	1	4	5	3	(R)IGISVIQR(N),(R)LEMEKEELQTAVEEAEGALEAEEGK(V).	(R)IGISVIQR(N),(K)DKNIEQLNEELQQQDEAIAK(V),(K)NIEQLNEELQQQDEAIAK(V),(K)NLEADYDTLQENFEELEDGKADMQK(Q),(R)LNSELEDAIIDLEK(A),(K)GTNDELNELLESLKR(E).	c28414_g1_i2	MDIDPNDPVAMLRIDKKSMMAANKEFETKKWVWVTDEKEGYKAAEIKSTKGDKLMVETNDGKEMEVKKDDTEQMNPPKYEKTEDMANLTYLNEASVIHNLKQRYYGGLIYTYSGLFCVAINPYRRLPIYSEAIVFAYRGKRKTEMPPHIFSICDNAYQNMLQDRENQSMLITGESGAGKTENTKKVIQYLAHVSGGMSKADKEHKEKTGGSLEDQVIQTNPILEAYGNAKTIRNNNSSRFGKFIRCHFGPQGKLAGADIESYLLEKSRVVYQQEGERNYHIFYQILKGATKELLDDLLIESSRKDDYPFLERGSEIAEGIDDVEEFHITELAADTLGFTADEKKSMYKICASCLHWGNAKFKQRPREEQAEVSDAKDLDKVSFLMKLPGADFIKNIIKP…	MYS_ARGIR	Myosin heavy chain, striated muscle	P24733	Argopecten irradians	Unknown	Cytoplasm	Actin binding
	61	Adenylate kinase-like [Exaiptasia pallida]	XP_020916906.1	29 kDa	0.053	0.067598	0.065959	0	0.30014	0.52172	0.16876	0.0496	0.0496	0	0.16	0.191	0.107	1	1	0	5	6	3	1	1	0	4	5	2	(R)YCVCHLATGDMLR(A)	(R)YCVCHLATGDMLR(A),(K)TLLDAVVEFAIDDSLLVK(R),(R)SDDNEATLTK(R),(K)AFEAAHAR(F).	c23200_g1_i1	MAPPIPQRGTVFKTEPGADAKGKAELEEMVKKAEACERGVRAILLGPPGSGKGTQAPKLAERYCVCHLATGDMLRAVVASGSALGKKVKAVMDSGALVSDDLVVELIDDNLNKPECQNGWLLDGFPRTVTQAEKLDGLLEKRKSLLDAVVEFAIEDSLLVKRITGRLLHKPSGRTYHTEFNPPKAHMKDDLTGEPLERRSDDNEATLGKRLQAYHAQTAPLVHYYTRRGIHHKIDASKPPNLVTEEVLKAFEAAHARFGKST	KAD2_DANRE	Adenylate kinase 2, mitochondrial	Q1L8L9	Danio rerio	Phosphorylation	Mitochondrion	Kinase activity
	62	Small heat shock protein p36-like [Exaiptasia pallida]	XP_020903556.1	22 kDa	0.00011	0	0	0	0.5409	0.45847	0.43898	0	0	0	0.296	0.245	0.245	0	0	0	6	5	5	0	0	0	5	4	4	Unidentified	(K)ILISTVDVK(N),(K)NYKPEEISLR(V),(K)HGTESFEFHR(V),(R)VFQLPADVDPSSVSSR(I),(R)ITYDGLLHIEAFK(T).	Unidentified	Unidentified	L2EFL_DROME	Protein lethal(2)essential for life	P82147	Drosophila melanogaster	Stress response	Z disc	Developmental protein
	63	Golgi reassembly-stacking protein 2-like [Exaiptasia pallida]	XP_020893232.1	50 kDa	0.74	0.038605	0.12061	0.090446	0.087208	0.095944	0.091867	0.0441	0.111	0.0861	0.103	0.103	0.103	1	3	2	3	3	3	1	3	2	2	2	2	(M)GAGSSTEIPGGGSEGYHVLR(V),(R)EVSITPSNMWGGQGLLGVSIR(F),(K)LYVYNSETDGCR(E).	(K)AGLEPFFDFIVSIENTR(L),(R)TNTDYIIGADSVLHESDDLFQLIESHEGKPLK(L).	c22821_g1_i1	MGAGSSTEIPGGGSEGYHVLRVQENSPGYKAGLEPFFDFIVAIENTRLDQDNETLKEILKSNAEKPVKMLVYSSKTLKVREVSITPSNMWGGQGLLGVSIRFCSFDGANENVWHVLDVQPNSPADIAGLRSNTDYIIGADSVLHESDDLFQLIESHEGKALKLYVYNSETDGCREVTLTPNSNWGGEGSLGCGIGYGYLHRIPQKEEDSLPPVSSSPAAPSSDGFSEVPLVGITTAATTPQQTVLDQGMASLNLESSTANAAMNPLNTSLTMPSTVESASIINPTTQPTPAPVPLYQSPPLIPTLVGETPTKSEVSTPPVPSAVPLYNTPLMSASTPPQVYPAPAAPGVQAPYTANSFPITSPVNPYSIPTQSTATPDLKYSTPSGSSTVTATPSQLLT…	GORS2_HUMAN	Golgi reassembly-stacking protein 2	Q9H8Y8	Homo sapiens	Organelle organization	Golgi apparatus	Protein binding
	64	Ubiquitin-conjugating enzyme E2 L3-like [Exaiptasia pallida]	XP_020893608.1	18 kDa	< 0.00010	0.11244	0.10971	0.12752	0.4208	0.46295	0.44328	0.098	0.098	0.098	0.301	0.301	0.418	1	1	1	4	4	4	1	1	1	3	3	4	(K)IEIVFPAEYPFKPPK(I)	(K)IEIVFPAEYPFKPPK(I),(K)GQVCLPIISPENWKPATK(T),(K)TDQVIQALVALIHDPEPEHPLR(A),(R)ADIAEEYTK(D)	c17550_g1_i1	MAATRRLTKELKDIRASNLKIFQSLEVDETNILYWQGLIVPDAQPYNKGAFRIEIVFPAEYPFKPPKITFKTKIYHPNIDEKGQVCLPIISPENWKPATKTDQVIQALVVLVENPEPEHPLRGDLAEEYTKDKKKFMKNAEDFTKKHSESRPK	UB2L3_MOUSE	Ubiquitin-conjugating enzyme E2 L3	P68037	Mus musculus	Protein ubiquitination	Nucleus	Transferase activity
	65	Calpain-B-like isoform X1 [Exaiptasia pallida]	XP_020896918.1	76 kDa	0.015	0	0	0	0.09696	0.083505	0.038296	0	0	0	0.0752	0.0556	0.0421	0	0	0	5	4	2	0	0	0	4	3	2	Unidentified	(K)NEFWSSLLEK(A),(R)GRPTELVR(V),(K)ITNEQNSSLDAK(F),(R)QIFDDVCGDDDEIDAYELQR(L).	Unidentified	Unidentified	CANB_DROME	Calpain-B	Q9VT65	Drosophila melanogaster	Proteolysis	Cytoplasm	Peptidase activity
	66	AP-1 complex subunit beta-1-like [Exaiptasia pallida]	XP_020909636.1	104 kDa	0.7	0.037511	0.036602	0.042541	0.084581	0.044365	0.013723	0.0276	0.0276	0.0276	0.0776	0.0414	0.0128	2	2	2	6	3	1	2	2	2	6	3	1	(R)TVEGQDMLYQSLK(F),(K)MIPGNPTVQLSLK(T).	(K)GLEVSGTFSR(R),(K)AMQAMDGLAIQLNK(N),(R)MDPLTNIQIAFK(N),(K)LQANNIFTIAK(R),(R)TVEGQDMLYQSLK(F),(K)MIPGNPTVQLSLK(T).	c30283_g1_i1	MTDSKYFTTTKKGEIFELKAELNSDKKDRKKEAVKKVIASMTVGKDVSSLFPDVVNCMQTDNLELKKLVYLYLMNYAKSQPDMAIMAVNTFVKDCEDPNPLIRALAVRTMGCIRVDKITEYLCEPLRKCLKDEDPYVRKTAAVCVAKLHDINSQLVEDQGFLDSLKELLSDANPMVVANAVAALSEINDSSPTAAAMMDMDSQTINKLLTALNECTEWGQIFILDSLAQYTPKDEREAQSICERVTPRLSHANAAVVLSAIKVLMKYMEMMTPSSGFVQSVLKKLAPPLVTLLSSEAEVQYVALRNINLIVQKRPEILKNEMKVFFVKYNDPIYVKLEKLDIMIRLASETNIAQVLAELKEYATEVDVDFVRKSVRAIGRCAIKVEPSAERCVSTLLDL…	AP1B1_HUMAN	AP-1 complex subunit beta-1	Q10567	Homo sapiens	Protein transport	Golgi apparatus	Protein binding
	67	Actin, cytoplasmic-like [Orbicella faveolata]	XP_020600465.1	28 kDa	0.024	2.5216	3.2156	2.4888	1.5483	1.9572	1.874	0.601	0.7	0.581	0.542	0.549	0.581	0	3	3	2	2	2	0	2	2	1	1	1	(-)mFETFNSPAmYVAIQAVLSLYASGR(T), (M)FETFNSPAmYVAIQAVLSLYASGR(T), (R)TTGIVFDSGDGVSHTVPIYEGYALPHAILR(L), (R)DLTDYLmK(I), (R)GYSFTTTAER(E), (K)LcYVALDFEQEMQTAASSSSLEK(S), (K)SYELPDGQVITIGNER(F), (R)cPEAmFQPSFLGmESAGIHETTYNSImK(C), (R)KYSVWIGGSILASLSTFQQmWISK(Q), (K)YSVWIGGSILASLSTFQQmWISK(Q), (K)QEYDESGPSIVHR(K).	(M)FETFNSPAmYVAIQAVLSLYASGR(T), (R)TTGIVFDSGDGVSHTVPIYEGYALPHAILR(L), (R)DLTDYLmK(I), (R)GYSFTTTAER(E), (K)SYELPDGQVITIGNER(F), (R)KYSVWIGGSILASLSTFQQmWISK(Q), (K)YSVWIGGSILASLSTFQQmWISK(Q), (K)QEYDESGPSIVHR(K).	c30882_g1_i1	MEDEVAALVVDNGSGMCKAGFAGDDAPRAVFPSIVGRPRHQGVMVGMGQKDSYVGDEAQSKRGILSLKYPIEHGIVTNWDDMEKIWHHTFYNELRVAPEEHPVLLTEAPLNPKANREKMTQIMFETFNSPAMYVAIQAVLSLYASGRTTGIVFDSGDGVSHTVPIYEGYALPHAILRLDLAGRDLTDYLMKILTERGYSFTTTAEREIVRDIKEKLCYVALDFEQEMQTAASSSTLEKSYELPDGQVITIGNERFRCPESLFQPAFLGMESAGIHETCYNSIMKCDVDIRKDLYANTVLSGGSTMYPGIADRMQKEIANLAPPTMKIKIIAPPERKYSVWIGGSILASLSTFQQMWISKQEYDESGPSIVHRKCF	ACTA_STRPU	Actin, cytoskeletal 1A	P53472	Strongylocentrotus purpuratus	Unknown	Cytoskeleton	Nucleotide binding
	68	PDZ and LIM domain protein 7-like isoform X2 [Exaiptasia pallida]	XP_020893814.1	63 kDa	0.013	0.030592	0.029851	0.034694	0.068187	0.04873	0.07183	0.0174	0.0174	0.0174	0.0626	0.0452	0.0626	1	1	1	3	2	3	1	1	1	3	2	3	(R)LEGGGPWGFR(L)	(R)LEGGGPWGFR(L),(R)EGDTIVSINYEDTR(N),(K)NTGNTLDLSVLR(G).	c26413_g1_i1	MTMAEPEINIRLEGGGPWGFRLTGGKDFGSRLTVSKITPGGKASYNGLREHDQIFSINYEDTRNMTHMDAQEAIKQAGSTLDLSIRRGDSPKIGRGPLTMTETVHSGKVDHKYNAVPKPFGAPSFQPSRQTQPQPSGAQPAPTIRSGPPATAPKPSSPMAPAYSHYTGGPPRSNVPPPGRDYIDNDAAMRAKKKEIEDEMLSQRFKLSISDDGEVNYDEASQVPNWGHPPDPNVQSKSFKMLQRHLQQHEDDDLPPPPPEAYDDQDEEKVQSKSFQMLRSAVDSGESPPSVFNRDRGDRSKPSTTPMPNRPTVPITKSTPEPYAPPPMSRPGQTPPVALPGMARQEPSGQSSQPKIRTQRPQAPSYQHPSHPPSAPQPPRGPPQGGGHQHEIKRQPIKP…	ZASP_DROME	PDZ and LIM domain protein Zasp	A1ZA47	Drosophila melanogaster	Regulation of cell-matrix adhesion	Cytoskeleton	Actin binding
	69	Beta-hexosaminidase subunit beta-like [Orbicella faveolata]	XP_020612680.1	62 kDa	0.082	0.097566	0.13033	0.035007	0.021778	0.02396	0.022942	0.0631	0.0631	0.0353	0.0148	0.0148	0.0148	3	4	1	0	0	0	2	2	1	0	0	0	(K)FNVLHWHVVDDQSFPFVSK(T), (R)VIPEFDTPGHTFSWR(S).	Unidentified	c30952_g1_i1	MAELCNTLLVIFGLFCFALPSSTTKPSLSDPLNLQRYGGKQQILAEDYVKGSIWPKPQGQTPTGVKFSLLPKSFSFSIKGKTSDVLTDAVKRYMKLTFPDSGVTTKDDKLAEITSLEINVVNDYKPITLESDESYTLTINAPQSTLYAYEVWGALRGLETFSQVVYQDENDLYYAQENKIIDYPRFHYRGFMIDTSRHYLKPSIILKFLDAMSYGKFNVLHWHVVDDQSFPFVSKTFPSLSGQGAYNNKTHIFSDDDVKNVIEYARMRGIRVIPEFDTPGHTFSWRSIENLLTKCCDKQGKPTGGLGPIDPTIDSNYDFLKTFFGEVGSRYPDQYLHLGGDEVSFDCWKSNPNITAWMQKHGMGSNYSLLEQYYEQKLLNIVGGLKKQYIIWQEVVDNN…	HEXB_HUMAN	Beta-hexosaminidase subunit beta	P07686	Homo sapiens	Metabolic process	Extracellular region	Beta-N-acetylhexosaminidase activity
	70	Golgin subfamily B member 1-like [Exaiptasia pallida]	XP_020902350.1	350 kDa	0.00066	0	0	0	0.015564	0.021503	0.016395	0	0	0	0.0143	0.0156	0.0156	0	0	0	4	5	4	0	0	0	4	4	4	Unidentified	(R)VAELENLVHR(L), (R)LEYDNSELENK(Y), (K)ERDDAEVQIAGLYEK(L), (K)SELVQVQNQLK(D).	Unidentified	Unidentified	ANT1_ONCVO	Major antigen	P21249	Onchocerca volvulus	Unknown	Unknown	Unknown
	71	LOW QUALITY PROTEIN: talin-2-like [Exaiptasia pallida]	XP_020909070.1	267 kDa	0.097	0.021611	0.021087	0.01624	0.015247	0.016775	0.010643	0.0157	0.0157	0.00964	0.0125	0.0125	0.00844	3	3	2	3	3	2	3	3	2	3	3	2	(K)TLQFNPEATVAEALR(I),(K)TYGVTFFLVK(E),(K)ISQLIAGYIDIILK(K).	(K)LGGLDELQRG(Y),(K)TYGVTFFLVK(E),(K)DISNLYDDIAK(N).	c32098_g1_i1	MALSLKIQVVKNNSVKTLQFNPEATVAEALRIIRDKVPDASPGKAADYGLFLPSDDLAKGKWLEPARSLNFYPLKNGDSVEYKTKIRLIKIKFMDNNVKTLQIDDSHTAGQILETICAKMGISNPEEFSLLVEGKEEEKDEAEKTSTIRRDKSMKDVPIKRMEERDRKKMEQLKKKLHTEDDVRWLDHDKTLRELGVSDTDTVVMRRKYFYSDQNVDIKDPVQLNLLYVQCRDGIIDGTHPCTIEEASQLGAIQIQVQFGDFDEGKYKLIDLKEFLPKEYVKTKSVDKKIKEEHRKLSGLDELQARYRYVQLCRGLKTYGVTFFLVKEKMKGKNKLVPRLLGITKESILRVDERTKEVMKTWPLTTVRRWAASPNSFTLDFGDYTESYYSVQTNEGEKI…	TLN2_HUMAN	Talin-2	Q9Y4G6	Homo sapiens	Cell adhesion	Plasma membrane	Protein binding
	72	14-3-3 protein epsilon-like [Exaiptasia pallida]	XP_020916667.1	29 kDa	0.025	0.22219	0.13667	0.15885	0.098822	0.051453	0.049266	0.0703	0.0703	0.0703	0.0625	0.0312	0.0312	3	2	2	2	1	1	2	2	2	2	1	1	(R)NLLSVAYK(N),(K)DSTLIMQLLR(D)	(R)NLLSVAYK(N),(K)DILDLLEK(H)	c12347_g1_i1	MADRDDNIYMAKLAEQAERYDEMVAAMKNIALLNVDLTTEERNLLSVAYKNVIGARRASWRIISSIEQKEKSKGEDNPKLGMIVEYRLQIEKELNDICEEILDLLTNHLIESAASDESKVFYYKMKGDYYRYVAEFTKNDPKSEKLAADNSMEAYDEAQKIAVEKLGKTNPIRLGLALNYSVFYYEIQNDPQKACKLAKQAFDNAISELDKLSEDSYKDSTLIMQLLRDNLTLWTADHPSEEADRGESTVLQDVGNEDET	1433_DICDI	14-3-3-like protein	P54632	Dictyostelium discoideum	Unknown	Cytosol	Unknown
	73	Actin, cytoplasmic [Orbicella faveolata]	XP_020600429.1	42 kDa	0.0036	0	0	0	1.3352	1.7843	1.7085	0	0	0	0.516	0.545	0.566	0	0	0	5	5	4	0	0	0	3	3	3	Unidentified	(R)TTGIVFDSGDGVSHTVPIYEGYALPHAILR(L), (R)KDLYANTVLSGGSTmFPGIADR(M), (K)DLYANTVLSGGSTmFPGIADR(M).	Unidentified	Unidentified	ACTC_PISOC	Actin, cytoplasmic	P12716	Pisaster ochraceus	Cell motility	Cytoplasm	ATP binding
	74	Gelsolin-like protein 1, partial [Exaiptasia pallida]	XP_020894746.1	28 kDa	0.006	0.2301	0.22452	0.26095	0.16234	0.11239	0.10761	0.0645	0.0645	0.0645	0.109	0.109	0.109	3	3	3	3	2	2	1	1	1	2	2	2	(K)TVELDTLLDDKPVQHR(Q)	(K)TVELDTLLDDKPVQHR(Q),(R)QVQGFETDLFK(S)	c29531_g1_i1	HRFLLGVHTLLQDFKESRKVKEFENLKMSGLVKAKEYDLEDSNVENIGSDMDKYVRKEAAQTEEAWIGAGQKVGIQIWRIEDFKVVAWPKSKYGQFYGGDSYIILRTYKEHESEELQYDLHFWIGKESTQDEMGTAAYKTVELDTLLDDKPVQYREVESHESRMFKEYFKRITHLEGGVASGFNHVETNSDLPPPCIFELCGETDMDIEYSQVTKATWNSLHSYSAFVIIVGRNIIRFLGSKSNKNEKYGLAVFLNDFKSDYPRLREIGCIDGDDELNRKVALYQKKKEKKDEDGEDDNDDDD	GELS1_LUMTE	Gelsolin-like protein 1	Q7JQD3	Lumbricus terrestris	Cellular component organization	Cytoplasm	Actin binding
	75	LOW QUALITY PROTEIN: beta-hexosaminidase subunit beta-like [Exaiptasia pallida]	XP_020897599.1	77 kDa	0.081	0.078005	0.049679	0.028269	0	0	0	0.0303	0.0303	0.0166	0	0	0	3	2	1	0	0	0	2	2	1	0	0	0	(K)FLDAMSYGK(F), (K)VLPDTVVNVWK(G).	Unidentified	c30952_g1_i1	MAELCNTLLVIFGLFCFALPSSTTKPSLSDPLNLQRYGGKQQILAEDYVKGSIWPKPQGQTPTGVKFSLLPKSFSFSIKGKTSDVLTDAVKRYMKLTFPDSGVTTKDDKLAEITSLEINVVNDYKPITLESDESYTLTINAPQSTLYAYEVWGALRGLETFSQVVYQDENDLYYAQENKIIDYPRFHYRGFMIDTSRHYLKPSIILKFLDAMSYGKFNVLHWHVVDDQSFPFVSKTFPSLSGQGAYNNKTHIFSDDDVKNVIEYARMRGIRVIPEFDTPGHTFSWRSIENLLTKCCDKQGKPTGGLGPIDPTIDSNYDFLKTFFGEVGSRYPDQYLHLGGDEVSFDCWKSNPNITAWMQKHGMGSNYSLLEQYYEQKLLNIVGGLKKQYIIWQEVVDNN…	HEXB_HUMAN	Beta-hexosaminidase subunit beta	P07686	Homo sapiens	Metabolic process	Extracellular region	Beta-N-acetylhexosaminidase activity
	76	Protein disulfide-isomerase like 2-1-like [Exaiptasia pallida]	XP_020912038.1	41 kDa	0.056	0	0	0	0.069351	0.076298	0.073056	0	0	0	0.0603	0.0603	0.0603	0	0	0	2	2	2	0	0	0	2	2	2	Unidentified	(R)YGVSGFPTIK(F),(K)TNKDGEEYSGGR(S).	Unidentified	Unidentified	PDI22_ORYSJ	Protein disulfide isomerase-like 2-2	Q942L2	Oryza sativa subsp. japonica	Unknown	Extracellular region	Isomerase activity
	77	Titin-like [Exaiptasia pallida]	XP_020893048.1	1891 kDa	0.00011	0	0	0	0.00213	0.0023434	0.0022438	0	0	0	0.00214	0.00214	0.00214	0	0	0	3	3	3	0	0	0	3	3	3	Unidentified	(R)NDSGSSSSTANLVVK(E), (K)VPPEITLVLR(N), (K)mSSDGEQcTLK(I)	Unidentified	Unidentified	TITIN_HUMAN	Titin	Q8WZ42	Homo sapiens	Muscle contraction	Cytosol	Metal ion binding
	78	Protein CutA homolog [Exaiptasia pallida]	XP_020892660.1	17 kDa	0.033	0.26135	0.25501	0.29639	0.30542	0.33602	0.32174	0.089	0.089	0.089	0.178	0.24	0.24	2	2	2	3	3	3	1	1	1	2	3	3	(K)NHPYDVPEVISFK(I)	(R)IPDVTDYIK(K),(K)NHPYDVPEVISFK(I),(K)IDQGNPGYLDFVR(T).	c25877_g1_i1	MRFLSRGLNVCKTLLHISSKNTKMAQEFSSGVFSTAFITCPNLETAKALARGMVEQNLAACVNVIPNITSIYTWENKLEEDSEVLLIVKTRSSRVPGISDYIKKNHPYDVPEVISFKIDQGMPSYLDFLNTKTAEKKVE	CUTA_XENLA	Protein CutA homolog	Q66KY3	Xenopus laevis	Response to metal ion	Unknown	Unknown
	79	Alpha-adducin-like [Exaiptasia pallida]	XP_020895547.1	69 kDa	0.62	0.05712	0.02722	0.031637	0.084524	0.044337	0.020733	0.0179	0.0179	0.0179	0.0798	0.0619	0.044	2	1	1	4	2	1	1	1	1	3	2	1	(R)GSDTLNYSK(Q),(R)AMAAGVDNLLK(I).	(R)TSPEDEHFLLNPFGLLYSEVTASSLIK(V),(R)AMAAGVDNLLK(I),(R)NPDVFVGDKPK(A)	c30609_g1_i1	MSASKTGRAITDMKARRLSAPARSKAVKRPEDIVRDVRGLKLRQRVSLVLNDKVLREELEDIVENFVHNGPKHTENIRAYQDFLIPSYGGAGGGCVVTPIADIRGSDTLNYSKQERLLRCKLASVYRLVDIFGWSTGIYGHITARTSNEEGHYLVNPFGLLYSEITASSLVKVDHGVNVIDGGSTSLGVSKAALVLHSAIHEARKDIKCVVHLHQSDCVAVAATEFGLLPISIEGSVLGEIAYHNYEGILLDDEEKQAIVRDMGDTSKVMVLRNHGIVCCGETVEEAFDLAFWTVKACEQQVRAMAAGVDNLLKIDEQARKHDVNAHKNFSTNMSKTQWKAGELQFEAYMRMLDSRGYRTGHLYKNPDVFVGDKPSAREVTSPATTTSTRAQLFFTPEY…	ADDA_HUMAN	Alpha-adducin	P35611	Homo sapiens	Cellular component organization	Cytoskeleton	Protein binding
	80	Sorting nexin-6-like [Exaiptasia pallida]	XP_020891895.1	46 kDa	0.6	0.041816	0.084513	0.047422	0.13124	0.032457	0.064371	0.0274	0.0348	0.0348	0.0846	0.0199	0.0522	1	2	1	4	1	2	1	1	1	4	1	2	(K)MKQELEAEYLATFK(K),(K)TVAMHEVFLTR(I).	(K)ESEFSVV(E),(R)EHEEFVWLHDR(L),(K)LGEGENTMTK(E),(K)LGEGENTMTKEEFQK(M),(K)TVAMHEVFLTR(I).	c29834_g1_i1	MDAADSSDMLEDEKSRTQSVDLSTDTSLVVDISDALSERDRVKFTVHTKTTLPDFKESDFSVVREHEEFIWLHDRLVENEEYAGIIIPPAPPKPDFDVSREKLQKLGEGENTMTKEEFQKMKQELEAEYLATFKKTVAMHEVFLTRIASHPSLRKDSNFKVFLEYKGELNVRGKNKKEKLGGLFKGLAKGVDEVLLSSQKDVDEFFESEKKFLVEYHNKLKDSTRKGDQMTRSHKNCADTFIKISTGVAAMGTSEYTGLDKFLNKAADYFERARKLEGRVASDEDLKLVDLLRYYLRDTEAAKDLLYRRAKCLSEYENANKTLDKARLKNKEVAAAESAQQNASEKFDHMSEVARQELTDFKARRVQQFRKNLTELVELELKHAKAHNQLLKNTLAALK…	SNX6_MOUSE	Sorting nexin-6	Q6P8X1	Mus musculus	Protein transport	Endosome	Protein binding
	81	F-actin-capping protein subunit beta-like isoform X1 [Exaiptasia pallida]	XP_020898439.1	32 kDa	0.24	0	0.12401	0.14414	0.19877	0.098652	0.20939	0	0.14	0.14	0.204	0.0842	0.249	0	2	2	4	2	4	0	2	2	4	2	4	(R)LEIDANSAFDQYR(E),(R)EMYFEGGVSSVYLWDLDHGFAGVILIK(K),(K)LTSTAMLWLQTNK(A),(R)NTLNEIYFGK(T).	(K)NLSDLIDLVPSLCEDLLSSVDQPLK(I),(R)SPWSNTYDPPLDDGAVPSDR(L),(R)KLEIDANSAFDQYR(E),(K)AGSGIMNLGGSLTR(Q),(R)NTLNEIYFGK(T).	c31719_g2_i1	MTDRQLDCALDLMRRLPPQQIEKNLSDLIDLAPELCEDLLSSVDQPLKIAKDKETGKDYLLCDYNRDGDSYRSPWSNTYEPALDDGAVPSDRLRKLEIDANSAFDQYREMYFEGGVSSVYLWDLDHGFAGVILIKKAGDGSKKIKGCWDSIHVVEVQEKSSGRQAHYKLTSTAMLWLQTNKTGSGIMNLGGSLTRQIEIDSSVNDANPHIANIGKMVEEMENKMRNTLNEIYFGKTRDIVHSLRSVNSIQDQSKQKAMQAELFQTLKSRQK	CAPZB_CHICK	F-actin-capping protein subunit beta isoforms 1 and 2	P14315	Gallus gallus	Cell morphogenesis	Cytoskeleton	Actin binding
	82	Heat shock cognate 71 kDa protein-like [Orbicella faveolata]	XP_020632080.1	71 kDa	0.0019	0.25531	0.17816	0.28954	0	0	0	0.122	0.121	0.122	0	0	0	3	4	4	0	0	0	3	3	3	0	0	0	(K)VEIIANDQGNR(T),(R)TTPSYVAFTDTER(L), (K)NQVAmNPSNTIFDAK(R), (R)IINEPTAAAIAYGLDKK(V), (K)SINPDEAVAYGAAVQAAILSGDK(S),	Unidentified	c27026_g1_i1	MAKAPAVGIDLGTTYSCVGVFQHGKVEIIANDQGNRTTPSYVAFTDTERLVGDPAKNQVAMNPINTVFDAKRLIGRRFEDPGVQDDMTHWPFQVISEGGRPKIRVEFKGETKTFFAEEISSMVLNKMKETAEAYLGTKVTDAVITVPAYFNDSQRQATKDAGVISGINVLRIINEPTAAAIAYGLDKKVGAERNVLIFDLGGGTFDVSILSIEEGIFEVKSTAGDTHLGGEDFDNKMVTHFVEEFKRKYKKNLTSNKRALRRLRTACERAKRTLSSSTQASIEIDSLFEGIDFYTSITRARFEELNSELFRKTKEPVEKSLRDAKLGKNEIHDIVLVGGSTRIPKIQSILREIFTDKELNKSINPDEAVAYGAAVQAAILSGDKHENVQDLLLLDVAPL…	HSP7D_MANSE	Heat shock 70 kDa protein cognate 4	Q9U639	Manduca sexta	Stress response	Nucleus	Nucleotide binding
	83	HSP 70. predicted protein [Nematostella vectensis]	XP_001639786.1	70 kDa	0.00037	0.11815	0.11529	0.13399	0.039768	0.021374	0.020466	0.117	0.0762	0.0871	0.0358	0.0358	0.0358	4	4	4	0	0	0	4	3	3	0	0	0	(K)AVNPDEAVAIGAAIQGGVLAGDVK(D), (K)DVLLLDVTPLSLGIETLGGVFTK(L), (R)EQQIVIQSSGGLSK(D), (K)SQVFSTAADGQTQVEIK(V).	Unidentified	c31660_g2_i2	MALQRLREAAEKAKIELSSAVQTDINLPYITVDASGPKHMNLKLSRAKFESLVGDLINRTVGPCKKCLQDAEISKSDIGDVLLVGGMTRMPKVQSTVQDIFGRQPSKAVNPDEAVALGAAIQGGVLAGDVKDVLLLDVTPLSLGIETLGGVFTKLITRNTTIPTKKSQVFSTAADGQTQVEIKVHQGEREMAADNKLLGQFQLVGIPPAPRGVPQVEVTFDIDANGIVNVSARDKGTGREQQIVIQSSGGLSKDAIENMIKEAEKFAESDRQKKETTEAVNHAESMIHDTETKMEEFKDQLPSEETDKLKEEITKVREVLANKESESAETIRQAYSELQQKSLKLFEMAYKKMASERESTGSTDTSSESTDNDDKKKDES	GRP75_BOVIN	Stress-70 protein, mitochondrial	Q3ZCH0	Bos taurus	Protein refolding	Mitochondrion	Unfolded protein binding
	84	NADP-dependent malic enzyme-like [Exaiptasia pallida]	XP_020892524.1	69 kDa	< 0.00010	0.15368	0.14995	0.17428	0	0	0	0.127	0.105	0.105	0	0	0	5	5	5	0	0	0	4	4	4	0	0	0	(R)ILGLGDLGCCGMGIPVGK(L); (R)FGPTTLIQFEDFGNHNAFR(F); (K)ICTFNDDIQGTAAVAVAGILASLK(I); (K)AIFASGSPFDPVTLPDGR(H); (K)YIQLMALLER(N)	Unidentified	c25775_g1_i1	MLPAAVQKGVPTISSRVGSLRSFFFKESHWVRLAATRRIFTATTAYFRMTEEKRVNKIPTIRGTDIMHDSRLNKGLAFTLQERQILGIQGLLPPYMSDQDTQAKRVYAEMHRKTNDLDKYIQLMALLERNESLFFRVLFDHTEEIMPIVYTPTVGLACQEYGMIFRRPRGLFISIYDKGHVNEIVANWPIQDVKAIVMTDGERILGLGDLGCCGMGIPVGKLALYTVCGGINPKCCLPVMIDVGTNNQSLLDDPFYIGVRQKRDNSEAYDELIDEFINAALQRFGPTTLIQFEDFGNHNAFRFLEKYRNKICTFNDDIQGTAAVAVAGIIASLKVTKTKLSDQQIVFQGAGEAAIGIANLLVLAMRKEGLSEEEAKKKIWLVDSKGLVVKDRAVGGLNA…	MAOX_ANAPL	ADP-dependent malic enzyme	P28227	Anas platyrhynchos	Oxidation-reduction process	Cytoplasm	Oxidoreductase activity
	85	Calmodulin-like isoform X1 [Exaiptasia pallida]	XP_020916587.1	21 kDa	0.033	0	0	0	0.46265	0.25893	0.15262	0	0	0	0.183	0.128	0.128	0	0	0	5	3	2	0	0	0	4	3	2	Unidentified	(R)NGTICTHELR(N),(K)DGFISFDDLK(R),(K)DGFISFDDLKR(T),(R)VCYTEFVQFFQR(E).	Unidentified	Unidentified	CALM_RENRE	Calmodulin	P62184	Renilla reniformis	Signal transduction	Unknown	Metal ion binding
	86	Putative aminopeptidase W07G4.4, partial [Exaiptasia pallida]	XP_020897390.1	24 kDa	0.002	0.17685	0.27748	0.20057	0	0	0	0.103	0.147	0.0938	0	0	0	2	3	2	0	0	0	2	3	2	0	0	0	(R)LIQLEYVGEGK(I); (K)IDQTLLLVGK(G); (K)GITYDTGGADIK(A)	Unidentified	c27931_g1_i1	MADILNLPAPVETTSNPKDGKWDGVVLVCEDLDWKCEPIDFLKDPIKAAQKVDKSAGSDVLLFPLSEGPPFVIHAPTGPVNRDYDDVRRYSDAAVKGIQRAIKAGSKSPLLVVPPKNSFADAWPVTVLGGFHGLYVPLEIREDVPSKKQKVDKLGVFLRGKKENVDYVSALESGRLVCRDIGGSDPERMAAPNVETYVRKIFEGTPVKISVLSEESAFERDYPLLAAVNRCAKHVERHRGRLIQLEYVGEGNIDQTLLLVGKGITYDTGGADIKAGGVMAGMHRDKCGAAAVAGFFQILAKLKPKGIKVLGKMAMVRNSVGADCYVADEIITSAAGVRVRVGNTDAEGRMVMADPLHHSKLEALKEKNPHIITIATLTGHAIRAMGPNYSIVLDNGPAA…	YH24_CAEEL	Putative aminopeptidase W07G4.4	Q27245	Caenorhabditis elegans	Proteolysis	Cytoplasm	Peptidase activity
	87	Elongation factor 1-alpha. predicted protein [Nematostella vectensis]	XP_001625311.1	52 kDa	0.0061	0.21101	0.11588	0.13468	0	0	0	0.0869	0.0466	0.0466	0	0	0	5	3	3	0	0	0	4	2	2	0	0	0	(R)GITIDIALWK(F); (K)YYVTVIDAPGHR(D); (R)LPLQDVYK(I); (K)IGGIGTVPVGR(V); (K)STTTGHLIYK(C).	Unidentified	c18587_g1_i1	MPPKGKGGEEGGKKGEKPHINIVVIGHVDSGKSTTTGHLIYKCGGIDKRAIEKFEKEAAEMGKGSFKYAWVLDKLKAERERGITIDIALWKFETNKYYVTVIDAPGHRDFIKNMITGTSQADCAVLIVASGTGEFEAGISKNGQTREHALLAFTLGVKQMIVACNKMDNTEPPYSEARFKEIEKEVSSYLKKIGYNPKKIHFLPISGWHGDNMLEKSEKMPWWNGFELFNKSAGAKTGSTLFDALDDINMPDRPTDKALRLPLQDVYKIGGIGTVPVGRVETGILKPGMLVTFAPVNLTTEVKSVEMHHTALTEALPGDNVGFNVKNLSVKDIKRGFVAGDSKNDPPKNIGFFDAQVIVLNHPGEIHNGYSPVLDCHTAHIACKFHEIKNKGDKRSGKV…	EF1A_APIME	Elongation factor 1-alpha	P19039	Apis mellifera	Translation	Cytoplasm	Nucleotide binding
	88	LOW QUALITY PROTEIN: arylsulfatase J-like [Exaiptasia pallida]	XP_020906513.1	56 kDa	< 0.00010	0	0	0	0.13467	0.14816	0.14187	0	0	0	0.138	0.138	0.138	0	0	0	5	5	5	0	0	0	4	4	4	Unidentified	(K)YPIHTGMQHSVILASQPYGLGLDETLLPQYLK(K),(R)GFDSFYGYWCGK(K),(R)GAGFVHSPLIK(K),(K)LLHVTDWLPTLYVR(A).	Unidentified	Unidentified	ARSJ_MOUSE	Arylsulfatase J	Q8BM89	Mus musculus	Unknown	Extracellular region	Metal ion binding
	89	Catenin delta 2. uncharacterized protein LOC110246590 [Exaiptasia pallida]	XP_020908604.1	213 kDa	0.086	0.027191	0.017554	0.030837	0.019184	0.0069293	0.013371	0.0168	0.0115	0.0168	0.0194	0.00839	0.0136	3	2	3	3	1	2	3	2	3	3	1	2	(K)FTVDTVDIGK(V),(K)FTVETVDIGK(I)	(K)FTVDTVDIGK(V),(K)GIFVEEVDVLPAEGER(T),(K)LDQVTVEVPSR(S)	c31592_g1_i1	MKFFTKVLQERGINDSRDDQDPLYSKNSKMEPGNVTGQSNTLVSPDWEKELMDADLTPGSHGQTVKKVVTRTEVRTVRTVDGRIVEDEYDPGTERVDIERYGYGGKTVNGDGPSTPRKSAGSQSSMDGYRSPRGTGARGGYSSADEGRRVPASNGPSGYMSDSYATPQAVQRTPSQGSAQGEPQYVRTAVQTTSMSLPRSHGPSPGPRGPGTATMPRTSSSGRPSTTYNLSIKVGDVKGTGTDGNVYIQLFGEKGNTAKIQLRQAGDTRNRFEKGRTYKFTVDTVDIGKVDRIKLSHDHTGYGSGFYVEEVEIEIPDRQDRVKFPCRCWLAQDVDDGKIEREMFPVPQLPNTSYTMSVKLGEVLSPDTNLHVQLFGETGETSKIMLRPVGTSFNRFEKG…	CTND2_HUMAN	Catenin delta-2	Q9UQB3	Homo sapiens	Cell adhesion	Cell junction	Protein binding
	90	Elongation factor 2-like [Exaiptasia pallida]	XP_020903118.1	93 kDa	0.62	0.041722	0.04071	0.023251	0.060965	0.032384	0.031008	0.0443	0.0443	0.0144	0.0743	0.0311	0.0431	2	2	1	4	2	2	2	2	1	4	2	2	(R)GFNQFVLDPIYK(L),(R)YTEPIPDVPCGNIVGLVGVDQYLVK(T)	(R)KIWAFGPEGTGPNLLVDMTK(G),(K)EGPQCEENVR(G),(K)AHLPVNESFGFTADLR(S),(K)GLSEGVPALDNYLDKL(-).	c26671_g1_i1	MSVIAHVDHGKSTLTDSLVSKAGIIAGAKAGETRFTDTRKDEQERCITIKSTAISMYYELSEDDIQHVPGGNKEERGFLINLIDSPGHVDFSSEVTAALRVTDGALVVVDSISGVCVQTETVLRQAIAERIKPVLFLNKMDRALLELQLEKEDLYQTFTRIVESVNVIIATYSDEDGPMGDITVSPEKGTVGFGSGLHGWAFSLKQFAEIYATKFKIEPKKLMNRLWGNSFYSAKEKKWKKEFAEGYVRGFNQFVLDPIYKVFDSVMNFKKDETQKLIDKLNIKLSVPEKEMEGKPLMKAMMRRWLPAGDTMLQMITMHLPSPVVSQNYRMELLYEGPKDDPIALGIKNCDPKAELCLYVSKMVPTTDKGRFYAFGRVFSGTVATGQKVRIMGPKYVPG…	EF2_CAEEL	Elongation factor 2	P29691	Caenorhabditis elegans	Translation	Cytoplasm	Nucleotide binding
	91	Protocadherin-like protein [Exaiptasia pallida]	XP_020900069.1	478 kDa	0.077	0	0	0	0.0056296	0.009322	0.0059304	0	0	0	0.00458	0.00756	0.00458	0	0	0	2	3	2	0	0	0	2	3	2	Unidentified	(R)LTYSLSGGDGK(F),(R)ASVGVPLAVVR(A),(K)LSAIGIDECAK(E)	Unidentified	Unidentified	PCDL_ACRMI	Protocadherin-like protein	B8V7Q1	Acropora millepora	Cell adhesion	Membrane	Metal ion binding
	92	Protein DJ-1-like [Exaiptasia pallida]	XP_020895378.1	20 kDa	0.017	0.099392	0	0	0.24804	0.5406	0.37945	0.0479	0	0	0.213	0.287	0.287	0	0	0	3	5	4	0	0	0	2	3	3	Unidentified	(K)GSALIILADGAEEMETVITADVLR(R),(R)GPGTSFEFGIELVR(A),(R)GPGTSFEFGIELVR(A),(R)GDDGEADKLAGPMLLK(-).	Unidentified	Unidentified	PARK7_RAT	Parkinson disease protein 7 homolog	O88767	Rattus norvegicus	Protein stabilization	Cytoplasm	Protein binding
	93	Chitinase-3-like protein 1 [Exaiptasia pallida]	XP_020902240.1	54 kDa	0.66	0.15639	0.24355	0.083446	0.14225	0.1565	0.11623	0.144	0.144	0.0903	0.0924	0.0924	0.0595	1	2	1	3	3	3	1	1	1	3	3	3	(R)VCYYTNWSQYRPK(G),(K)TQIAVGGWTHEEK(D),(K)TQIAVGGWTHEEKDSPFSK(M),(R)LLLTAAVAAGLWTIK(G),(K)GAYDIEGISKPLDWINVMTYDLHGTWEYK(T),(K)TGHHTAMGPDGDKLTLXFAIWYWMNNR(D).	(K)YEENDFDLYKR(I),(K)TQIAVGGWTHEEKDSPFSK(M),(K)FGFDGLDLDWEYPGMR(G),(R)EAFEAEAK(A),(K)IVLGLATYGR(A).	Unidentified	Unidentified	CHIA_MOUSE	Acidic mammalian chitinase	Q91XA9	Mus musculus	Metabolic process	Extracellular region	Chitinase activity
	94	Adapter molecule crk-like [Exaiptasia pallida]	XP_020893922.1	30 kDa	0.00035	0	0	0	0.21927	0.171	0.23098	0	0	0	0.184	0.149	0.149	0	0	0	4	3	4	0	0	0	3	3	3	Unidentified	(K)TPGTFLVR(E),(R)ESSTIPGDYVLSVSESSK(V),(K)GTFYQIGEQTFTTLPEIIEFYK(R)	Unidentified	Unidentified	CRK_CHICK	Adapter molecule crk	Q04929	Gallus gallus	Signal transduction	Membrane	Ephrin receptor binding
	95	ADP-ribosylation factor 1 isoform X2 [Exaiptasia pallida]	XP_020917327.1	20 kDa	0.045	0	0	0	0.61419	0.3798	0.15446	0	0	0	0.481	0.282	0.105	0	0	0	6	4	2	0	0	0	6	4	2	Unidentified	(K)LFSGLFGK(K),(R)ILMVGLDAAGK(T),(K)LGEIVTTIPTIGFNVETVEYK(N),(K)NISFTVWDVGGQDK(I),(R)MLNEDELRDAVLLVFANK(Q),(K)QDLPNAMNAQEVTDK(L).	Unidentified	Unidentified	ARF1_DROME	ADP-ribosylation factor 1	P61209	Drosophila melanogaster	Protein transport	Golgi apparatus	Nucleotide binding
	96	Retinal dehydrogenase 1-like [Exaiptasia pallida]	XP_020916234.1	53 kDa	< 0.00010	0.074705	0.072893	0.084721	0	0	0	0.0451	0.0451	0.0451	0	0	0	2	2	2	0	0	0	2	2	2	0	0	0	(K)IFINNEFVDAVSK(K), (R)ILELIESGK(T).	Unidentified	c27302_g1_i1	MNIPEVKYTKLFINNEFVDAVSKKTFPTINPTTEEKICDVAEADKADVDIAVKAAKEAFKLGSPWRTMDASQRGRLLYKLGTLIERDAEYLSRLESLDGGKVVSESAGDMNATINCFKYYAGWADKTNGKTIPADGQLFTYTRNEPVGVVGAITPWNFPLMLASLKIAPALACGCVVILKPAEQTPLTAVYLGSLIKEAGIPPGVVNILPGYGPTAGAAISEHMEVDKVTFTGSTEIGRIIQKAAAMSNLKRVSLELGGKSPNIVFADADLDQAVQGCFVGLFFNQGQCCCAGSRVFVEEGIYDDFVKKLVEMAVARKVGQPLLKETQQGPQIDSDQFKKILELIESGKTEGAKLECGGGRHSDKGYFIEPTVFSDVQDHMRIAKEEIFGPVMQVFKFK…	AL1A1_CHICK	Retinal dehydrogenase 1	P27463	Gallus gallus	Oxidation-reduction process	Cytoplasm	Oxidoreductase activity
	97	Uncharacterized protein LOC110250314 [Exaiptasia pallida]	XP_020912576.1	52 kDa	0.00031	0	0	0	0.1137	0.090918	0.087054	0	0	0	0.0602	0.0387	0.0387	0	0	0	4	3	3	0	0	0	4	3	3	Unidentified	(K)SIISTFPK(K),(K)KITDIGTFFK(Y),(K)ITDIGTFFK(Y),(R)MELPGSQMSK(T).	Unidentified	Unidentified	SYR_MYCBO	Arginine--tRNA ligase	P67570	Mycobacterium bovis	tRNA aminoacylation for protein translation	Cytoplasm	Aminoacyl-tRNA ligase activity
	98	Inorganic pyrophosphatase-like [Exaiptasia pallida]	XP_020895431.1	38 kDa	0.0011	0	0	0	0.11586	0.12747	0.16991	0	0	0	0.0742	0.0742	0.0742	0	0	0	3	3	4	0	0	0	2	2	2	Unidentified	(K)TLVNMVVEVPR(W),(K)HMPGLLDATVDWFK(I).	Unidentified	Unidentified	IPYR_DROME	Inorganic pyrophosphatase	O77460	Drosophila melanogaster	Phosphate-containing compound metabolic process	Cytoplasm	Inorganic diphosphatase activity
	99	Cathepsin Z-like [Exaiptasia pallida]	XP_020898172.1	33 kDa	< 0.00010	0	0	0	0.13625	0.1499	0.14353	0	0	0	0.0878	0.0878	0.0878	0	0	0	3	3	3	0	0	0	2	2	2	Unidentified	(K)YAHETGIPDETCNNYQAK(D),(K)GVEYWIVR(N).	Unidentified	Unidentified	CATZ_BOVIN	Cathepsin Z	P05689	Bos taurus	Proteolysis	Lysosome	Cysteine-type peptidase activity
	100	NADP-specific glutamate dehydrogenase like. uncharacterized protein LOC110066880 [Orbicella faveolata]	XP_020629795.1	55 kDa	0.0076	0.15394	0.19356	0.27837	0	0	0	0.0465	0.0646	0.105	0	0	0	1	2	3	0	0	0	1	2	3	0	0	0	(R)VEFNSAIGPYK(G), (R)FHPTVNLGILK(F), (R)HIGPNTDVPAGDIGVGGR(E).	Unidentified	c27917_g1_i2	MMLRVLNRRGVSVLSRVGIVRCVSTTTPTLAQATDKSKDKEQYKFTSIDGFMDFVAKKNPGELEFHQAVHEVVTSIWDHLSENPYYNKHNVLERIVEPERVVIFRVPWRDDKGQINVNKGYRVEFNSAIGPYKGGLRFHPTVNLGILKFLGFEQVFKNSLTTLPLGGGKGGSDFDPKGKSDNEVMNFCQSFMSELQRHIGPNTDVPAGDIGVGGREIGYMFGQYKRIRNEFTGVLTGKSHGWGGSLLRPEATGYGLVYFTAEMLGTKGESLKGKTVTVSGSGNVAQFATEKVTQMGGKVVTLSDSSGTIYDPDGITKEKLAYVTDLKNVQRGRISEYALKYGVKFYEGKRPWFIKCDVALPCATQNEVDEEDAQTLVDNGCTCVAEGANMPTEPKAIEI…	DHE3_BACTN	Glutamate dehydrogenase	P94598	Bacteroides thetaiotaomicron	Metabolic process	Cytosol	Oxidoreductase activity
	101	Xylose isomerase-like isoform X2 [Exaiptasia pallida]	XP_020915860.1	52 kDa	0.018	0.077059	0.11641	0.087391	0.054367	0.028984	0.027752	0.0592	0.0833	0.0592	0.0548	0.0263	0.0263	2	3	2	2	1	1	2	3	2	2	1	1	(K)LGVPYWTFHDR(D),(K)LGAENFVFWGGR(E),(K)HQYDYDAQTVIGFLK(T)	(R)DVAPEGETLAETNANLDEITDLALELQK(K),(K)LLWATCNLFANPR(Y),(K)LGAENFVFWGGR(E)	c21124_g1_i1	MSSFAPSTKRAKIASSEVSERDYFKGIPKIEFKPDAGATDVLCYKHYNAKEVINGKTMEEWLRFSVCYWHTFRGTGADPFGFPTLTRPWEDGTNSMENAKRRLRVAFEFFSKLGVPYWTFHDRDIAPEGETLAETNANLDEITDLALELQKKTGVKLLWATCNLFAHTRYMNGAATNPDAHVFAYAAAQVKKGLEIAKKLGAENFVFWGGREGYHTMLNTDVKRELDHMANFFRMVIAYKKKIGFTGQLLIEPKPKEPTKHQYDYDAQTVIGFLKTYGLDKDFKLNIEPNHTTLAGHSYEHDVVVASKYGLLGSIDSNTGSPDLGWDTDQFPMDVKNCTFVMKAVIEQDGLAPGGLNFDCKVRRESTDVQDMFIAHIGAMDSFARGLKSAVKLIEEGKL…	XYLA_HORVU	Xylose isomerase	Q40082	Hordeum vulgare	Metabolic process	Unknown	Isomerase activity
	102	Gamma aminobutyric acid receptor-associates protein like 2. predicted protein [Nematostella vectensis]	XP_001637976.1	14 kDa	0.28	0.14593	0.54229	0.37217	0	0	0	0.145	0.214	0.145	0	0	0	1	3	2	2	2	1	1	2	1	0	0	0	(K)FLVPSDLTVAQFMYIIR(K),(K)AMFLFVNK(V)	(K)FLVPSDLTVAQFMYIIR(K),(K)AMFLFVNK(V)	c30000_g2_i1	MKWAFKEEHSLESRCQESSKIRSKYPDRIPVVVEKAPKSSIQDIDKRKFLVPSDLTVAQFMYIIRKRIQLPPEKAMFLFVNKVLPTTSSTMGAIYEEHKDEDGFLYIAYSGENTFGN	GBRL2_RAT	Gamma-aminobutyric acid receptor-associated protein-like 2	P60522	Rattus norvegicus	Autophagy	Cytosol	Protein binding
	103	Acidic mammalian chitinase-like [Exaiptasia pallida]	XP_020902237.1	35 kDa	0.014	0.72751	0.49945	0.37607	0.081236	0.089375	0.13447	0.343	0.234	0.21	0.0729	0.0729	0.1	4	4	1	1	1	1	2	2	1	1	1	1	(R)LLLTAAVAAGLWTIK(G),(K)GAYDIEGISKPLDWINVMTYDLHGTWESK(T),(K)TGHHTAMGPEGDKLTLPFAIWYWMNNR(D),(R)DTWEKPGIR(N),(K)IVLGLGTYGR(A),(K)YTGAEGFLAYFEICK(L),(K)LGLTVVHK(N).	(R)EAFEAEAK(A),(R)DTWEKPGIR(N),(R)AFGLANPANNGLDAAR(D).	Unidentified	Unidentified	CHIA_HUMAN	Acidic mammalian chitinase	Q9BZP6	Homo sapiens	Metabolic process	Extracellular region	Chitinase activity
	104	Muscle-specific protein 20-like [Exaiptasia pallida]	XP_020895643.1	21 kDa	< 0.00010	0	0	0	0.3292	0.36218	0.34679	0	0	0	0.19	0.19	0.144	0	0	0	4	4	3	0	0	0	4	4	3	Unidentified	(R)VWIEAVLGDK(V),(R)LAIALGAK(I),(K)VNEQNMPFK(Q),(K)QMENISNFLK(H).	Unidentified	Unidentified	MYPH_ECHGR	Myophilin	Q24799	Echinococcus granulosus	Unknown	Unknown	Unknown
	105	Mesencephalic astrocyte-derived neurotrophic factor homolog [Exaiptasia pallida]	XP_020898099.1	20 kDa	0.013	0	0	0	0.3602	0.70938	0.37945	0	0	0	0.25	0.25	0.203	0	0	0	4	6	4	0	0	0	3	5	3	Unidentified	(K)DKECEVCIK(F),(K)VKDSLTSEEEGDYK(K),(K)DSLTSEEEGDYK(K),(K)SKDAQICELQYEQK(I),(K)ILNDFDETCQGCVEK(S).	Unidentified	Unidentified	ARMET_DROSI	Mesencephalic astrocyte-derived neurotrophic factor homolog	B4QX46	Drosophila simulans	Unknown	Extracellular region	Developmental protein
	106	Myosin regulatory light polypeptide 9-like [Exaiptasia pallida]	XP_020892193.1	19 kDa	0.071	0	0	0	0.66685	0.28044	0.16437	0	0	0	0.339	0.281	0.246	0	0	0	6	3	2	0	0	0	5	3	2	Unidentified	(K)EAFNMIDQNR(D),(R)DGFISKDDLAATFDSLGK(L),(K)DDLAATFDSLGK(L),(K)LVKDDYLEEMLNEASGPINFTMFLTLFGEK(I),(K)DDYLEEMLNEASGPINFTMFLTLFGEK(I).	Unidentified	Unidentified	SQH_DROME	Myosin regulatory light chain sqh	P40423	Drosophila melanogaster	Myosin II filament assembly	Cytoplasm	Metal ion binding
	107	Fibronectin type III domain-containing protein-like [Exaiptasia pallida]	XP_020907185.1	141 kDa	0.13	0	0	0	0.029271	0.043436	0	0	0	0	0.023	0.0293	0	0	0	0	3	4	0	0	0	0	3	4	0	Unidentified	(K)AIVTDGAMYK(C),(K)CVAYTDTK(Q),(K)QGTSVDSPITK(A).	Unidentified	Unidentified	FP_ACRMI	Fibronectin type III domain-containing protein	B8VIW9	Acropora millepora	Unknown	Membrane	Unknown
	108	Selenium-binding protein 1-like [Exaiptasia pallida]	XP_020898889.1	54 kDa	0.00092	0	0	0	0.11034	0.1565	0.11623	0	0	0	0.15	0.15	0.15	0	0	0	4	5	4	0	0	0	4	4	4	Unidentified	(K)SPTYSQVIHR(L),(K)VQTIDLGVGTIPLEIR(F),(R)FLHDPNQAQGYVGCALSSTIVR(F),(K)KVEGWALPEMPGLITDILISLDDK(Y).	Unidentified	Unidentified	SBP1_XENTR	Methanethiol oxidase	Q569D5	Xenopus tropicalis	Oxidation-reduction process	Cytoplasm	Oxidoreductase activity
	109	Collagen alpha. uncharacterized protein LOC110252824 isoform X1 [Exaiptasia pallida]	XP_020915325.1	206 kDa	0.0005	0	0	0	0.026746	0.029425	0.020965	0	0	0	0.0389	0.0234	0.0186	0	0	0	4	4	3	0	0	0	4	4	3	Unidentified	(K)LVQDDCTCSSDCGSGYK(C),(K)VLVLLTDGR(Q),(R)AAAIIYSDDPILSIDFDLFNTQEGFLDGVDKLPYIMQR(T),(K)NSFAQTICR(K).	Unidentified	Unidentified	CO6A6_HUMAN	Collagen alpha-6(VI) chain	A6NMZ7	Homo sapiens	Cell adhesion	Extracellular region	Extracellular matrix structural constituent
	110	Citrate synthase, mitochondrial-like [Exaiptasia pallida]	XP_020899677.1	53 kDa	0.057	0	0	0	0.14566	0.090301	0.11894	0	0	0	0.123	0.0699	0.0953	0	0	0	5	3	4	0	0	0	5	3	4	Unidentified	(K)EQVVNLSHEWAAK(A),(K)FVQAYNSGVPK(A),(R)YVFDDSMELIAK(L),(K)LPTLAAYIYR(N),(R)ALGVLASLVWDR(A)	Unidentified	Unidentified	CISY_DANRE	Citrate synthase, mitochondrial	Q7ZVY5	Danio rerio	Metabolic process	Mitochondrion	Transferase activity
	111	Plastin-1-like [Exaiptasia pallida]	XP_020908682.1	72 kDa	0.0013	0	0	0	0.059072	0.042356	0.040556	0	0	0	0.0547	0.0391	0.0391	0	0	0	3	2	2	0	0	0	3	2	2	Unidentified	(K)YSSAHAGSQFLDFLSK(K),(K)MSPEELLLR(W).	Unidentified	Unidentified	PLSI_MOUSE	Plastin-1	Q3V0K9	Mus musculus	Cellular component organization	Cytoplasm	Actin binding
	112	Arginine kinase. predicted protein [Nematostella vectensis]	XP_001641325.1	79 kDa	< 0.00010	0.075371	0.073544	0.085477	0	0	0	0.0537	0.0537	0.0537	0	0	0	3	3	3	0	0	0	3	3	3	0	0	0	(K)GSDIGSVFSR(L), (R)VVGVLTSLTGDLAGK(Y).	Unidentified	c31555_g3_i1	MEKGSDIGSVFSRLCRAVNEIDKKLGFQHTKKHGYLTSCPSNLGTGMRASVHVKIPHAKEHPDFDNILTKYHIQARGIHGEHSESTGEDAGVYDISNRRRLGLSEVQCVQDMYDGVKALMELEKEAIAKKRSVFPEVLKNPEVKSLLRKYLTPELFDSLKDKKTAKGISLYDCINSGVVNLDSSAGVYAGDEESYTLFAPLFDKIVEDYHSPYKLANKHTSDMNPEKVDAPNLDPEGTYIRSTRIRVARNLKGYALTPGLTRNERLDIERKVVGVLSSLTGDLAGKYHPLTGMDEATRQKLVDDHFLFKKGDR	KARG_ANTJA	Arginine kinase	O15992	Anthopleura japonica	Phosphorylation	Unknown	Kinase activity
	113	Elongation factor Tu-like. uncharacterized protein LOC110250626 isoform X2 [Exaiptasia pallida]	XP_020912889.1	49 kDa	< 0.00010	0	0	0	0.05693	0.062633	0.059971	0	0	0	0.0554	0.0554	0.0554	0	0	0	2	2	2	0	0	0	2	2	2	Unidentified	(K)TTLTAAITK(I),(K)LLDXGEAGDNLGALIR(G).	Unidentified	Unidentified	EFTU_PICGU	Elongation factor Tu, mitochondrial	A5DN78	Meyerozyma guilliermondii	Translation	Mitochondrion	Elongation factor
	114	Puromycin-sensitive aminopeptidase-like [Exaiptasia pallida]	XP_020896508.1	146 kDa	0.37	0.026495	0.012784	0.014858	0.018693	0.04206	0.019691	0.021	0.0101	0.0101	0.0202	0.0349	0.021	2	1	1	2	4	2	2	1	1	2	4	2	(K)YCAVTQFEPTDAR(R),(K)FALEVAVKTLPFYK(E)	(K)FALEVAVK(T),(K)EYFGISYPLPK(M),(R)ETALLIDPENSSSATK(Q),(R)TVQQSLENVR(L)	c31007_g1_i1	MNCTLLRFSLCSKLLLRPLSLSFSFSSTQFPVIHKVSLTFTSRFTTMSRKPFERLPANVVPKNYDLTLQPSLTEFTFSGKQVVEVEVTKATNKVVLNSLDIKISSVKFTAGSVDLSAGDISYSKEDETATILFSSELPVGKGNLYLDFTGELNDKMKGFYRSKYLDDGKEKYCAVTQFEPTDARRAFPCWDEPAQKATFDVTLVVPKDLVALSNMNVVEEKQADDDKSLKVVKYARTPVMSTYLLAFVVGEYDYVEDKDKDGVLVRVYTPKGKAVQGKFALEVAVQTLPFYKDYFGISYPLPKMDLIAIADFAAGAMENWGLVTYRETALLIDPENSSSAAKQWVALVVGHEIAHQWFGNLVTMEWWTHLWLNEGFATWIEYLCVDHCFPEYDIWTQFV…	PSA_MOUSE	Puromycin-sensitive aminopeptidase	Q11011	Mus musculus	Proteolysis	Cytoplasm	Metallopeptidase activity
	115	Ras-related protein Rab-11A [Exaiptasia pallida]	XP_020898934.1	25 kDa	0.0019	0.16986	0.26583	0.19264	0	0	0	0.106	0.261	0.106	0	0	0	2	3	2	0	0	0	2	3	2	0	0	0	(K)VVLIGDSGVGK(S),(K)STIGVEFATR(S),(R)GAVGALLVYDIAK(H),(K)NGLSFIETSALDSTNVEVAFQNILTEIYHIVSQK(Q).	Unidentified	c31046_g4_i1	MGTKDDEYDYLFKVVLIGDSGVGKSNLLSRFTRNEFNLESKSTIGVEFATRSIQVDGKTIKAQIWDTAGQERYRAITSAYYRGAVGALLVYDIAKHLTYENVERWLKELRDHADSNIVIMLVGNKSDLRHLRAVPTDEAKAFAEKNGLSFIETSALDSTNVEVAFQNILTEIYHIVSQKQIHDSPTSDGSHPSNNVQTIHVAPTTDEDRKKKVQCCNA	RB11A_RAT	Ras-related protein Rab-11A	P62494	Rattus norvegicus	Protein transport	Endosome	Nucleotide binding
	116	Glucose-6-phosphate isomerase-like [Exaiptasia pallida]	XP_020910035.1	62 kDa	0.01	0.097197	0.12983	0.071592	0	0	0	0.0485	0.0754	0.0485	0	0	0	3	4	2	0	0	0	2	3	2	0	0	0	(K)TFTTIETITNATTAK(T), (R)NMFAFWDWVGGR(Y), (R)FAAYFQQGDMESNGK(F)	Unidentified	c26781_g1_i1	MSSPDSKKQKKMSSLMISAEWAALQQHYHSKASVLHMRELFESDPNRFKKFSIQLDTPKDGKLLVDYSKNIVNDETMKLLFDLARSRGVESMRDKMFSGEKINFTENRAVLHVALRNRSNKPILVDGKDVMGDVNGVLQHMREFSEAVRSGTWKGHTGKSITDVVNIGIGGSDLGPLMVTEALQPFGQKGLNVHFVSNIDGTHIAKTLAKLNPETSLFIIASKTFTTIETITNATTAKTWLLKSLKEKSAVSKHFVALSTNEQKVTDFGIDKKNMFAFWDWVGGRYSLWSAIGLSIAIYIGMDNFEALLSGAHTMDNHFCSAPLEKNLPVILAVLGIWYNNFFGTQTHGLFPYDQYMHRFAAYFQQGDMESNGKYVTRFAEEVDYSTGPIVWGEPGTNG…	G6PI_PIG	Glucose-6-phosphate isomerase	P08059	Sus scrofa	Metabolic process	Cytoplasm	Isomerase activity
	117	Flagellin. hypothetical protein NEMVEDRAFT_v1g225978, partial [Nematostella vectensis]	XP_001617566.1	30 kDa	< 0.00010	0	0	0	0.15218	0.16743	0.16031	0	0	0	0.087	0.087	0.087	0	0	0	3	3	3	0	0	0	2	2	2	Unidentified	(R)NLSTSGSSLATTIQR(L),(K)DDAAGLAISER(F).	Unidentified	Unidentified	FLA_TATMI	Flagellin	P53606	Tatlockia micdadei	Cell motility	Extracellular region	Structural molecule activity
	118	Collagen alpha 5. uncharacterized protein LOC110240827 [Exaiptasia pallida]	XP_020902303.1	1238 kDa	0.0078	0	0	0	0.0043475	0.004783	0.0022839	0	0	0	0.00402	0.00402	0.00294	0	0	0	4	4	2	0	0	0	3	3	2	Unidentified	(K)ALGPSGIAPPGAYVPK(C), (K)KPQcDSQSGLTEcQLER(Q), (R)ALGVLGVAPPGR(F).	Unidentified	Unidentified	CO6A4_MOUSE	Collagen alpha-4(VI) chain	A2AX52	Mus musculus	Cell adhesion	Extracellular region	Collagen binding
	119	Superoxide dismutase [Mn], mitochondrial-like [Exaiptasia pallida]	XP_020892835.1	25 kDa	0.043	0.078444	0.076542	0.088961	0.26989	0.12992	0.19934	0.0402	0.0402	0.0402	0.232	0.165	0.232	1	1	1	4	2	3	1	1	1	3	2	3	(K)DFGSFENFK(X)	(K)HTLPDLAYDYDALEPTINTEIMR(L),(K)HHATYVNNLNVAEEK(Y),(K)AIYDVIDWTNVADR(Y).	c27625_g1_i1	MLSRAKSGFQCMQKLSPAVLNVLVRAKHTLPDLAYDYDALEPTINTDIMRLHHSKHHQTYVNNLNVAEEKFAEAQAKGDLAATIALQPALKFNGGGHLNHTIFWTNLSPNGGGEPTGELMEAIKRDFGSFENFKERFNAATIAVQGSGWGWLGYDKVNKRLAISTCVNQDPLQATTGHIPLLGIDVWEHAYYLQYKNVRPDYVKAIYDVVDWTNVADRYQAATN	SODM_MACNE	Superoxide dismutase [Mn], mitochondrial	Q5FB30	Macaca nemestrina	Oxidation-reduction process	Mitochondrion	Oxidoreductase activity
	120	Endoplasmin-like [Exaiptasia pallida]	XP_020907283.1	101 kDa	0.12	0	0	0	0.056146	0.014714	0.028633	0	0	0	0.0745	0.0161	0.0275	0	0	0	4	1	2	0	0	0	4	1	2	Unidentified	(K)YSQFINFPIYLWTSK(V),(R)GIVDSDDLPLNVSR(E),(K)LGVIEDHSNR(T),(K)KGYEVLYLIEPVDEYCMQSLPEFEGK(K)	Unidentified	Unidentified	ENPL_RAT	Endoplasmin	Q66HD0	Rattus norvegicus	Protein folding	Endoplasmic reticulum	Unfolded protein binding
	121	Disks large homolog 1-like isoform X1 [Exaiptasia pallida]	XP_020892827.1 (+3)	97 kDa	0.55	0.019676	0.039043	0.045378	0.02823	0.031058	0.029738	0.0183	0.0469	0.0469	0.024	0.024	0.04	1	2	2	2	2	2	1	2	2	2	2	2	(K)GLGFSIAGGHGNQHVPGDNGIYITK(I), (R)LQVAQLYPIAIFIKPK(S).	(K)IIDGGAAQQDGR(L), (K)ELVTIVISR(I), (K)GAGSTVTITAQYKPEEYNQFEAK(I).	c29719_g1_i1	MPVHKEDADRALELLEKYHEKLTKPQDRALRGAIERVIRIFQSRLFLALLDIQEFYEATLLDGSKSPQQKAYETLEVAEKWETRPVDSDQGDVSHPHYSNDKVNSTPRDERAPETQRSEPQPYTPVSFTSQIPSESLPLAPESVDGPDKKEKEIPSSDEDHEYLDITLKRGGAGLGFSIAGGTDNPHIDDDFGIYITKVIKGGAAAQDGRLRVNDCITAVNETTTVNVNHQQAVDALKAAGEHVTLAVKRKKDKGKTPHREEIILSKGSKGLGFSIAGGHGNQHVPGDNGIYITKIIDGGAAQQDRRLQVGDKIISVNDKNLEDVSHEDAVQVLKATKEKVIIVISRLAGFNGEDTSVPTPVAPVTPAVTPAVQETTQTSPPEAPKTGENGSLTNSLPP…	DLG1_XENTR	Disks large homolog 1	Q28C55	Xenopus tropicalis	Cell adhesion	Membrane	Unknown
	122	Tyrosine-protein phosphatase non-receptor type 11-like [Exaiptasia pallida]	XP_020898511.1	63 kDa	0.075	0.062323	0.0936	0.034448	0	0	0	0.061	0.061	0.0341	0	0	0	2	3	1	0	0	0	2	2	1	0	0	0	(K)IQNSGDYYDLYGGE(K), (K)FATLSELVQYYTENPGQLR(E).	Unidentified	c29926_g1_i1	MPSRRWFHSNISGLDAEKLLTERGLDGSYLVRPSKSNPGDFTLSVRRNGEVTHIKIQNSGDYYDLYGGEKFATLSELVQYYTENPGQLREKNGQLIEMKYPLNSADPTTERWFHGHMSSKEAETVLLDKGKNGSFLVRESQGRPGNYVLTVRCDDKITHVMIRNHGNGQYDVGGGEKFDDLTELVEHYKKNPMVEKSGTVVHLRNPFNATRINAACIEDRVKELQKENKNVTGKAGFYEEFEVLQKQECKHLYSRKEGERPENKSKKRYKNILPFDHSRVLLKGRDPNVVGSDYLNANYINGEAQGTEKQYIAAQGCLPATVEDFWAGVYQENSRIIVMTTKEVERGRNKCTRYWPDPETVKDVGKYHVKHVKETELPDYVLSQFELTTDDDFIPRTIY…	PTN11_HUMAN	Tyrosine-protein phosphatase non-receptor type 11	Q06124	Homo sapiens	Dephosphorylation	Cytoplasm	Protein binding
	123	Glyoxylate reductase/hydroxypyruvate reductase-like [Exaiptasia pallida]	XP_020910639.1	35 kDa	< 0.00010	0	0	0	0.12901	0.14194	0.1359	0	0	0	0.0621	0.0621	0.0621	0	0	0	3	3	3	0	0	0	3	3	3	Unidentified	(K)DAIFCLLTEK(I),(K)VVATMSVGYDHVDTK(E),(R)RIVEAAAEAK(N),(R)IVEAAAEAK(N).	Unidentified	Unidentified	GRHPR_HUMAN	Glyoxylate reductase/hydroxypyruvate reductase	Q9UBQ7	Homo sapiens	Oxidation-reduction process	Extracellular exosome	Oxidoreductase activity
	124	Expansin like 1 isoform X2. uncharacterized protein LOC110251213 [Exaiptasia pallida]	XP_020913561.1	38 kDa	0.13	0	0	0	0.035594	0.081689	0.12244	0	0	0	0.0329	0.0685	0.121	0	0	0	1	2	3	0	0	0	1	2	3	Unidentified	(K)ISFVAVDCPTVPGQAGNIQFR(F),(R)FQGSNPWYIK(L),(K)IPTAGLEAVIGGR(F).	Unidentified	Unidentified	YOAJ_BACSU	Expansin-YoaJ	O34918	Bacillus subtilis	Unknown	Extracellular region	Unknown
	125	Myophilin-like isoform X1 [Exaiptasia pallida]	XP_020915418.1 (+1)	19 kDa	0.0025	0	0	0	0.2549	0.17167	0.16437	0	0	0	0.144	0.144	0.144	0	0	0	3	2	2	0	0	0	2	2	2	Unidentified	(K)MQENISNFLK(A),(K)QNVGQVISCLQALSR(V).	Unidentified	Unidentified	MYPH_ECHGR	Myophilin	Q24799	Echinococcus granulosus	Unknown	Unknown	Unknown
	126	Heat shock protein HSP 90-alpha-like [Exaiptasia pallida]	XP_020896728.1	84 kDa	0.0048	0	0	0	0.068482	0.036229	0.053057	0	0	0	0.0468	0.0468	0.0468	0	0	0	4	2	3	0	0	0	2	2	2	Unidentified	(R)YHSSTSGDEMTSLK(D),(R)GFEVLYMVEPIDEYAVQQLK(E)	Unidentified	Unidentified	H90A1_DANRE	Heat shock protein HSP 90-alpha 1	Q90474	Danio rerio	Stress response	Cytosol	Chaperone
	127	Myosin light chain kinase. uncharacterized protein LOC110245270 [Exaiptasia pallida]	XP_020907189.1 (+1)	41 kDa	0.0021	0	0	0	0.10892	0.16641	0.11474	0	0	0	0.072	0.072	0.072	0	0	0	3	4	3	0	0	0	2	2	2	Unidentified	(K)SVQGVKPDEHPDLK(Y), (K)HIAGEYFIAIQR(R).	Unidentified	Unidentified	HTP1_SAPPC	RxLR effector protein Htp1	D3JZP7	Saprolegnia parasitica	Unknown	Extracellular region	Unknown
	128	Ribonuclease UK114-like [Exaiptasia pallida]	XP_020893771.1	15 kDa	0.032	0	0	0	0.34192	0.37618	0.21538	0	0	0	0.225	0.225	0.225	0	0	0	3	3	2	0	0	0	2	2	2	Unidentified	(K)TMYISGQLGLDPK(T),(K)QALTNMGHILEAGGSAFNK(V).	Unidentified	Unidentified	RIDA_CAPHI	2-iminobutanoate/2-iminopropanoate deaminase	P80601	Capra hircus	Metabolic process	Cytoplasm	Nucleotide binding
	129	Histone H2B-like [Exaiptasia pallida]	XP_020896800.1 (+4)	25 kDa	0.48	0	0	0	0.11925	0.1312	0.058839	0	0	0	0.117	0.117	0.0495	0	0	0	2	2	1	0	0	0	2	2	1	Unidentified	(K)QVHPDTGISSK(A),(K)AMSIMNSFVQDVFER(I)	Unidentified	Unidentified	H2B_RHASC	Histone H2B	Q75VN4	Zhangixalus schlegelii	Transcription	Nucleosome	Nucleotide binding
	130	Predicted protein [Nematostella vectensis]	XP_001634494.1	268 kDa	0.013	0.021584	0.03553	0.01622	0	0	0	0.0139	0.0235	0.0139	0	0	0	3	5	2	0	0	0	2	4	2	0	0	0	(R)HRPDLIEFEK(L); (K)EEVGATVEAVQELIK(K); (R)EVDDLELWIADK(E); (K)DGINESWADLLELIETR(T)	Unidentified	c32124_g1_i2	MSVEIDVKHPLDRPSTDLLEVSRHRLEGLPTHMEDRDADVMRAFIDSMGTMGEVTADFSQVHGSEEEWMEQQSSARLFERSRIKVLADERERVQKKTFTKWINSHLQRVGARVNDLYHDLQDGRKLILLLEILSGEKLPKPSKGRMRIHNLENVEKCLVFLKKQRVHLENIGAHDIVDGNQKITLGLIWTIILRFQIQDIMIEGETKERRSAKDALLLWCQSKTVGYRNVTITNFTTSWRDGLAFNAIIHKHRPDLIEFEKINKVDAEQNLEQAFEVAETQLGITPLLDAEDVMVDFPDEKSIITYVSAYYHYFAKMKTVEVSGTRIGKVIERIKENEELINEYEKLATDLLEWIEMRIQTLADRDFANTLVGVQQQMLEFNQYRTQEKPPRFVEKGNL…	SPTB2_MOUSE	Spectrin beta chain, non-erythrocytic 1	Q62261	Mus musculus	Cellular component organization	Membrane	Protein binding
	131	40S ribosomal protein S4-like, partial [Exaiptasia pallida]	XP_020902294.1	33 kDa	0.011	0	0	0	0.19025	0.20931	0.090759	0	0	0	0.148	0.148	0.0756	0	0	0	4	4	2	0	0	0	4	4	2	Unidentified	(K)GVPYLVTHDAR(T),(K)FDTGNMAMIVGGR(N),(K)DATGHQFATR(L),(R)LTNVFIIGK(G).	Unidentified	Unidentified	RS4_IXOSC	40S ribosomal protein S4	Q4PMB3	Ixodes scapularis	Translation	Ribosome	Nucleotide binding
	132	Predicted protein [Nematostella vectensis]	XP_001636825.1	97 kDa	0.18	0.04006	0.039089	0.045431	0.04311	0.047429	0.045414	0.0255	0.0255	0.0255	0.0394	0.0394	0.0394	1	1	1	2	2	2	1	1	1	2	2	2	(K)YCAVTQFEPTDAR(R),(R)YEGGFLLSR(L)	(R)ETALLIDPENSSSATK(Q),(R)AGLNQYLNK(F),(R)YEGGFLLSR(L)	Unidentified	Unidentified	PSA_MOUSE	Puromycin-sensitive aminopeptidase	Q11011	Mus musculus	Proteolysis	Cytoplasm	Peptidase activity
	133	Glutamyl aminopeptidase-like isoform X1 [Exaiptasia pallida]	XP_020909182.1	123 kDa	0.22	0.015572	0	0.01766	0.033841	0.012087	0.023453	0.0216	0	0.0216	0.0207	0.0122	0.0122	1	0	1	3	1	2	1	0	1	2	1	1	(K)QWVATVVAHELAHQWFGNLVTmK(W)	(R)HIATTHFEPTDAR(A),(K)MMDQFLLDK(A).	c32035_g1_i1	QLLFIHVLMDEGYSPDNEGWSSSDSFEDIDNVSLLPDIERKPNRIRRRRVRFLRDRSCEFSIRRMCSRRTLVYTSITAVLLVSVVLISVFVKPSTSEEFEETKPEKRSETQDEPQKKEDIKSEKPYLDHEGNKFGWQNIRLPTNLVPLKYRVELHPNITTFKFTGTVDMLVKCVNNTDKIFFHAKHMEITTIKVAKIKKKGDELEVLTIKKITRSKELEMQSIQVNEELQADQDYIVFVEFKAPLSDKLFGFYKSSYKNKRGEIRYLATTHFEPTDARAAFPCFDEPALKAKFEIIIIRDQHHTALSNMPLRKTEKLKDGLLKDYFEETVKMSTYLIAFVVCDFKHLSDRTQSGTLVRVWAPPDDIEEARFALSEAKKILFYYEKFFKVNFPLPKLDLI…	AMPE_BOVIN	Glutamyl aminopeptidase	Q32LQ0	Bos taurus	Proteolysis	Membrane	Peptidase activity
	134	Lysosomal aspartic protease-like [Exaiptasia pallida]	XP_020899502.1	43 kDa	< 0.00010	0	0	0	0.066488	0.073149	0.07004	0	0	0	0.0716	0.0716	0.0716	0	0	0	2	2	2	0	0	0	2	2	2	Unidentified	(K)VVFDTGSSNLWVPSK(K),(K)LVPSAVFSFYLNR(D)	Unidentified	Unidentified	ASPP_AEDAE	Lysosomal aspartic protease	Q03168	Aedes aegypti	Proteolysis	Lysosome	Peptidase activity
	135	Disintegrin and metalloproteinase domain-containing protein 10-like [Exaiptasia pallida]	XP_020910720.1	79 kDa	0.0027	0	0	0	0.034882	0.058762	0.056265	0	0	0	0.0281	0.0407	0.0435	0	0	0	2	3	3	0	0	0	2	3	3	Unidentified	(R)ISEVTFAHELGHGFGSQHDPEGTCSPGGK(N),(K)GDCSLSICTK(Y),(K)NPGKDECLAAK(K),(K)GYCDVFAVCR(M)	Unidentified	Unidentified	ADA10_PIG	Disintegrin and metalloproteinase domain-containing protein 10	O77633	Sus scrofa	Proteolysis	Membrane	Peptidase activity
	136	Prostasin-like [Exaiptasia pallida]	XP_020912686.1	45 kDa	0.0015	0.042971	0.04193	0.048733	0.062856	0.069153	0.066214	0.0455	0.0455	0.0455	0.0732	0.0732	0.0732	1	1	1	2	2	2	1	1	1	2	2	2	(K)HPFYDAYNNHDYDVALLK(M)	(K)GAWPWQITMNYK(N),(K)GGIDACQGDSGGPLVCK(T)	c26944_g1_i1	MVIRVILVLSFFCGVAANAPSLDELNELFKQEHVRNKRSDCVDQMQYCSSYKAYCNDPAYKDYLKKECKKTCNFCVKPCVDRFPKCTVYLSSCAIDSYRKSLEYYCSKTCGFCKVPTTTQAPTTLPRTEKPIEHGDIKCGTKGKGNTRIVGGTRAKKGAWPWQITMNYKNNKAAKTPHWCGGSVVAKQWIVTAAHCFVYGDNPSDYTVVMGEHDLNVTDGYEQKIDIERIIKHPFYDAYNNHDYDVALIKLKSNLTFNDRVRPVCLPSNDYPAGANCYISGWGHLFESGHGPWVLHQAMVPLVSRNVCQKSFDDLRYKLTARMRCAGNGIGGIDACQGDSGGPLVCKTGDTWYLMGAISWGIGCARKNRYGVYSDMTDLKYWVQGTIHAD	KLKB1_BOVIN	Plasma kallikrein	Q2KJ63	Bos taurus	Proteolysis	Extracellular region	Peptidase activity
	137	Protein lin-7 homolog C-like [Exaiptasia pallida]	XP_020913341.1	21 kDa	0.007	0.32126	0.19345	0.22484	0	0	0	0.118	0.169	0.169	0	0	0	3	2	2	1	0	0	0	2	2	0	0	0	(K)TDEGLGFNVMGGR(E), (K)RGDQLLSVNGVSVEGENHER(A), (R)EQNSPIYISR(I).	Unidentified	c23174_g1_i1	MASTEPLTLARDVNRAIELLQKLQSSGDIPSKKLQALKKVLESEFCQAIREVYEHVYETVDIQGSPELRAQATAKATIAAFAASEGHAHPRVVELPKTDEGLGFNVMGGREQNSPIYISRIIPGGVADRHGGLKRGDQLLSVNGVSVEGENHERAVDLLKAAQGKVRLVVKYTPKLLEEMEARFNSQRGSKKR	LIN7B_HUMAN	Protein lin-7 homolog B	Q9HAP6	Homo sapiens	Exocytosis	Membrane	Protein binding
	138	Lamin-L(I)-like [Exaiptasia pallida]	XP_020904780.1	65 kDa	< 0.00010	0	0	0	0.042649	0.046922	0.044928	0	0	0	0.0523	0.0523	0.0523	0	0	0	2	2	2	0	0	0	2	2	2	Unidentified	(K)QIQTWGSGNEVR(T),(R)TALVNAGGEELATLSEEK(V)	Unidentified	Unidentified	LAML1_XENLA	Lamin-L(I)	P09010	Xenopus laevis	Unknown	Nucleus	Unknown
	139	Phosphomethylethanolamine N-methyltransferase-like [Exaiptasia pallida]	XP_020900254.1	31 kDa	< 0.00010	0	0	0	0.094206	0.10364	0.099239	0	0	0	0.0674	0.0674	0.0674	0	0	0	2	2	2	0	0	0	2	2	2	Unidentified	(R)DTILHIADKETLFTNFLK(W),(K)ETLFTNFLK(W)	Unidentified	Unidentified	PEAM3_ARATH	Phosphoethanolamine N-methyltransferase 3	Q9C6B9	Arabidopsis thaliana	Metabolic process	Cytoplasm	Transferase activity
	140	Glutaredoxin-3-like [Exaiptasia pallida]	XP_020913610.1	37 kDa	0.88	0.052463	0.051191	0.059497	0.077339	0.040722	0.038991	0.0399	0.0399	0.0399	0.0736	0.0399	0.0399	1	1	1	2	1	1	1	1	1	2	1	1	(K)YEISAVPTFLLFK(N)	(K)YEISAVPTFLLFK(N),(R)INGANAPELTK(K)	c8468_g1_i1	YHITSNMAAVNEVISSAQFDKILSDSSRALTVVYFFAPWSPQYGQMSDVVQVLSKDNPHVTFVKLEAEKVPEVSYKYEISAVPTFLLFKNQKVVDRINGANAPELTKKVEHHSSIITPPQVNDEPPIAKEDINTRLKNIINSSPCMLFMKGTPEEPKCGFSRQVVEVLKNVCADYGSFDILKDDDVRQGLKKYSNWPTYPQLYVNGELVGGLDIIKEMAESGDLQSMLPKKQDLKSRLESLINSSPVMLFMKGNQDTPRCGFSRQMVGILAKYNPKIPLKTFDILQDNEVREGLKKHSNWPTYPQLYSKGELIGGLDIVRELDENGELEDALGIKE	GLRX3_XENTR	Glutaredoxin-3	Q28ID3	Xenopus tropicalis	Oxidation-reduction process	Cytosol	Oxidoreductase activity
	141	Failed axon connections homolog [Exaiptasia pallida]	XP_020907479.1	45 kDa	0.005	0.088402	0.13415	0.10025	0	0	0	0.0376	0.0927	0.0627	0	0	0	2	3	2	0	0	0	1	2	2	0	0	0	(R)AVAHAFSTMAEENTYWSLAYYR(W), (K)YYSNLAPVVK(D), (K)HTKDEIYGIAEADLR(A).	Unidentified	c18643_g3_i1	MSTEVESVPQEQPEVAVEAAKPDENHVEENKPAEEAEAAEKIEDAVVDGESKKEENGSVPPKVILHQHPPCNNIPSFLPASLKLETFLRMHKIPYENKYVHKLGSDKVKLPFIEYEGDKVQDANFCIKYLNNKFELNPDGHLTEEQRAIGHAFSTMAEENTYWSLAYYRWVDNFSETKKYYSNLAPVVKDVRPKLDQSKCIKCMQAHGIGKHTKDEIYGIAEADLRAISAFLGEKEFFMDGEPSVIDCTMFGLLASIVDGAPESPQAKLIKEEMKNLEKFCDTMKLNYWLDWGDICNDENAEEFKPKSRLSFKNKKKRAKSTDGKEGESDKAEEKEEEKKEGEEAAAASEEAAPEKEEGAASGETATPEEGAKPEETKKEEAEAEPSKEPEKEKEEEEK…	FAXC_HUMAN	Failed axon connections homolog	Q5TGI0	Homo sapiens	Unknown	Membrane	Unknown
	142	Translation elongation factor 2-like [Orbicella faveolata]	XP_020628913.1	94 kDa	0.0031	0.06329	0.061756	0.097383	0	0	0	0.0619	0.0619	0.0726	0	0	0	2	2	3	0	0	0	2	2	3	0	0	0	(K)GFLINLIDSPGHVDFSSEVTAALR(V), (R)ALLELQLEK(E), (R)GFNQFVLDPIYK(M), (K)AYLPVNESFGFTADLR(S).	Unidentified	c26671_g1_i1	MSVIAHVDHGKSTLTDSLVSKAGIIAGAKAGETRFTDTRKDEQERCITIKSTAISMYYELSEDDIQHVPGGNKEERGFLINLIDSPGHVDFSSEVTAALRVTDGALVVVDSISGVCVQTETVLRQAIAERIKPVLFLNKMDRALLELQLEKEDLYQTFTRIVESVNVIIATYSDEDGPMGDITVSPEKGTVGFGSGLHGWAFSLKQFAEIYATKFKIEPKKLMNRLWGNSFYSAKEKKWKKEFAEGYVRGFNQFVLDPIYKVFDSVMNFKKDETQKLIDKLNIKLSVPEKEMEGKPLMKAMMRRWLPAGDTMLQMITMHLPSPVVSQNYRMELLYEGPKDDPIALGIKNCDPKAELCLYVSKMVPTTDKGRFYAFGRVFSGTVATGQKVRIMGPKYVPG…	EF2_CAEEL	Elongation factor 2	P29691	Caenorhabditis elegans	Protein biosynthesis	Ribonucleoprotein complex	Elongation factor
	143	Predicted protein [Nematostella vectensis]	XP_001638214.1	96 kDa	0.0075	0.040583	0.039599	0.070217	0	0	0	0.0389	0.0389	0.0389	0	0	0	2	2	3	0	0	0	2	2	2	0	0	0	(K)HGSIIYHPSLLPR(H), (K)AGFSIFWADDGLDTGPILLQK(S).	Unidentified	c31953_g1_i1	MAQLKIAIIGQSQFGLEVYKRLRSKGHEIVGVFTIPDVNGKPDILAIGAEEDGVQVFKFPRWRVKGKPIEDVVNQYTQCGAELNVMPFCSQFIPMNVIDFPKHGSIIYHPSILPRHRGASAINWTLMEGDKRGGFTIFWADDGLDTGPILLQKIVDIDRNDTVDTLYNRFLYPEGIKGMVEAVELIADGKAPKIPQTEDGATYDKIWKKKEVAKINWGLPAAALHNFIRGNDKLPGAWATIDGEQVTFYSSNLGPRKRVPQGTEIYIDGHDKAAIVHKDGMTLFGSDGKMLTVKTLQLADGRMVSASKYGLEEEETVALELTDDEKVIVDKIKTIWAGILANPDINDETDFFKAGAGSMDVARLVEEVKQKCAVVLESEEVYLNTGFEAFVRLSILRSR…	AL1L1_XENLA	Cytosolic 10-formyltetrahydrofolate dehydrogenase	Q6GNL7	Xenopus laevis	Oxidation-reduction process	Cytoplasm	Oxidoreductase activity
	144	Short-chain collagen C4-like [Exaiptasia pallida]	XP_020912364.1	34 kDa	0.012	0	0	0	0.039955	0.092161	0.088244	0	0	0	0.0475	0.0854	0.0854	0	0	0	1	2	2	0	0	0	1	2	2	Unidentified	(R)TSCPSGANLVYK(G),(K)MMIPATYECPAGWSK(E)	Unidentified	Unidentified	CAS4_EPHMU	Short-chain collagen C4	P18503	Ephydatia muelleri	Unknown	Extracellular region	Unknown
	145	Glutathione S-transferase Mu 3-like [Exaiptasia pallida]	XP_020903965.1	14 kDa	0.51	0.14113	0	0.16005	0.2231	0.10954	0.10489	0.131	0	0.131	0.238	0.107	0.107	1	0	1	2	1	1	1	0	1	2	1	1	(K)ITFVDFVMYELLDQHK(V)	(R)LLLNYVGEEFEDR(K),(K)ITFVDFVMYELLDQHK(V)	c27898_g1_i1	MAPVFAYWDIRGLAQPIRLLLHYSEVEFEDKRYSCGPAPDYSRECWMKDKFTLGLDFPNLPYYIDGDIKITQSNAIVRHIARKKNLCGETEKEKVIVDMMENQLMDFRNGFVGLCYNVKGYDDAKPKYLENVVPKIKAFADFLGEKKFLVGDKITFVDFVMYELLDQHKVFDASLLEPHANLKAYLERIEALPAIAEYMKSDKFITRPINNTVAKWR	GSTM3_HUMAN	Glutathione S-transferase Mu 3	P21266	Homo sapiens	Metabolic process	Cytosol	Transferase activity
	146	Predicted protein [Nematostella vectensis]	XP_001631110.1 (+5)	21 kDa	0.047	0.09394	0.091663	0	0.14317	0.15751	0.15082	0.0652	0.0652	0	0.125	0.125	0.125	1	1	0	2	2	2	1	1	0	2	2	2	(K)INVNEIFYDLVR(Q)	(K)LVVLGSGGVGK(S),(K)INVNEIFYDLVR(Q).	c31585_g1_i1	MREYKLVVLGSGGVGKSALTVQFVQGIFVEKYDPTIEDSYRKQVEVDAQQCMLEILDTAGTEQFTAMRDLYMKNGQGFVLVYSITAQSTFNDLQDLREQILRVKDTDDVPMVLVGNKCDLEDERVVGKDQGQNLAKQFSNCTFLETSAKLKINVNEIFYDLVRQINRKTPEAKNKKKKKGCVLL	RAP1B_RAT	Ras-related protein Rap-1b	Q62636	Rattus norvegicus	Cell communication	Cell junction	Nucleotide binding
	147	Dihydropteridine reductase-like [Exaiptasia pallida]	XP_020908985.1	26 kDa	0.02	0	0.073834	0	0.18171	0.12505	0.11973	0	0.0615	0	0.16	0.111	0.111	0	1	0	3	2	2	0	1	0	3	2	2	(K)QSVWTSLIASSIAAK(H).	(K)GALGATCVTYFK(A),(K)SWTEQDQEVQKR(M),(K)QSVWTSLIASSIAAK(H).	Unidentified	Unidentified	DHPR_BOVIN	Dihydropteridine reductase	Q3T0Z7	Bos taurus	Oxidation-reduction process	Cytoplasm	Oxidoreductase activity
	148	Lipoxygenase homology domain-containing protein 1-like isoform X1 [Exaiptasia pallida]	XP_020908668.1	290 kDa	0.095	0	0	0	0.0046316	0.010248	0.0098127	0	0	0	0.00503	0.0089	0.0116	0	0	0	1	2	2	0	0	0	1	2	2	Unidentified	(K)IVLRPTGGPTDTFQEGK(V),(K)FAVETVDIGDLTK(V)	Unidentified	Unidentified	LOXH1_HUMAN	Lipoxygenase homology domain-containing protein 1	Q8IVV2	Homo sapiens	Oxidation-reduction process	Cell projection	Catalase activity
	149	Lethal(2) giant larvae protein homolog 1-like isoform X1 [Exaiptasia pallida]	XP_020899312.1 (+1)	131 kDa	0.91	0	0.014174	0.016474	0	0.02283	0.010796	0	0.0102	0.0102	0	0.0178	0.0135	0	1	1	0	2	1	0	1	1	0	2	1	(R)IQELHFLPEQGR(I),(R)CIYFVDTFLK(D)	(K)ISVCSLSMK(T),(K)VEWHDNYIFFAGGMPR(A)	c30500_g1_i1	MLKLVRRYRGKSTDAHIKDKLGQELFAFNKTIEHGFPHKPSALAHDPQLQLLAIGTEDGTLRIYGKPGVQLTACHEEETRIQELHFLPEQGRIISVCDDGEQNSIHLWEVNKKEGKSVLEEVKTCTLEGRLKKISVCCLSMKTNRLLLGTEGGNIYLLDINSFELQEYVIYQDVVMQSVEEENKTNAGSVEAIQEHPEDSKKILIGYKKGLIVLWNHESCNVQHTFPNSIDLESISWNEAGDKFISSHADGSQSIWSVPKSEAITTEETSTPFGPFPCKAITKVEWQDNTILFAGGMPRASYGDKNTISLMQGSSTQVVFDFSSRVIDFLVISNPDTNKPACLAVLCEQEFVVIDLQTKEQGYPTFLQPYLICLHSSPITTSFHCRGCSNELWDQINAA…	L2GL1_RAT	Lethal(2) giant larvae protein homolog 1	Q8K4K5	Rattus norvegicus	Exocytosis	Cytoskeleton	Protein binding
	150	Alpha-L-fucosidase-like [Exaiptasia pallida]	XP_020907650.1	54 kDa	0.0088	0	0	0	0.052024	0.057236	0.026591	0	0	0	0.0501	0.0327	0.0327	0	0	0	2	2	1	0	0	0	2	1	1	Unidentified	(K)DTVVVNDR(W),(K)FEDATTLDKPSWGFR(R).	Unidentified	Unidentified	FUCO_BRAFL	Alpha-L-fucosidase	C3YWU0	Branchiostoma floridae	Metabolic process	Extracellular region	Glycosidase
	151	Uncharacterized protein LOC110245611 [Exaiptasia pallida]	XP_020907554.1	55 kDa	< 0.00010	0	0	0	0.050395	0.055444	0.053088	0	0	0	0.0405	0.0405	0.0405	0	0	0	2	2	2	0	0	0	2	2	2	Unidentified	(K)NQPTYGDNPTAR(N), (R)VELIVDGR(A).	Unidentified	Unidentified	ECDE_ASPRU	Putative glycosyl hydrolase ecdE	K0E4E1	Aspergillus rugulosus	Metabolic process	Unknown	Glycosidase
	152	PREDICTED: rab GDP dissociation inhibitor alpha-like [Acropora digitifera]	XP_015780141.1	37 kDa	0.0089	0.10789	0.10528	0.19174	0	0	0	0.0388	0.0388	0.0567	0	0	0	2	2	3	0	0	0	1	1	2	0	0	0	(K)VPADEKEALATSLmGIFEK(R), (K)EALATSLmGIFEK(R).	Unidentified	c24410_g1_i1	MDEEYDVIVLGTGLKECILSGLLSVNGKKVLHMDREKYYGGETASLSPLEELFKKFGKTGEVQDKYGKGRDWNVDLVPKFLMAGGELVQMLILSGVTRYLEFKSIKGSYVYKGSKIYKVPADEKEALATSLMGIFEKRRFRKFLIFTNDYDSDDSKTWGGIDPKKSTMQDVYDKFGLDVNTADFTGHSLALYTNDDYKSQPCGPTLSKIKLYSESLARYGTSPYLYPLYGLGELPQGFARLSAIYGGTYMLDKPIEGIVYDDNGQVTGVTSQGETARTKIVVSDTSYFPDKTKKVGQVVRCICILDHTVANTKDAESLQIIIPQNQVGRKSDIYVAVLSSANNVAAKGFYLAFVTTTVETNNPEAELKPGLDLLGPVLEKFVDVVDLKEPIDDGSKSKV…	GDIA_BOVIN	Rab GDP dissociation inhibitor alpha	P21856	Bos taurus	Protein transport	Cytoplasm	Nucleotide binding
	153	Lysosomal alpha-mannosidase-like [Exaiptasia pallida]	XP_020913027.1	102 kDa	0.027	0	0	0	0.026818	0.014521	0.043055	0	0	0	0.0321	0.0188	0.0653	0	0	0	2	1	3	0	0	0	2	1	3	Unidentified	(R)IAWHIDPFGHSNEQASLFAQMSFDGFFFGR(I),(R)QVFSPFISQVVR(L),(K)MLLEPILSFTENPSTVK(X)	Unidentified	Unidentified	MA2B1_MACFA	Lysosomal alpha-mannosidase	Q60HE9	Macaca fascicularis	Metabolic process	Lysosome	Alpha-mannosidase activity
	154	Cathepsin L1-like [Exaiptasia pallida]	XP_020904698.1	36 kDa	0.016	0.11176	0.052151	0.060613	0	0	0	0.157	0.0615	0.0615	0	0	0	2	1	1	0	0	0	2	1	1	0	0	0	(K)QCGSCWAFSATGSLEGQHFK(K), (K)LVSLSEQNLVDCSTSFGNHGCQGGLMDNAFR(Y).	Unidentified	c29945_g1_i1	MLSVLFLVVLVAVAQSSPFGEEDLQWKAWKSFHAKKYTTESEEGQRRAIWRNNLEIIKAHNTGKHSYTMAMNQFGDLTATEFKYLFLGYRAGNSTRGSTFMPPSNVVLPATVDWRTKGYVTPVKNQKQCGSCWAFSATGSLEGQHFKKTGKLVSLSEQNLVDCSTSYGNHGCQGGLMDNAFRYIKANGGIDTEASYPYEARNERCRFKSSDVGATDTGFTDVQSGSEEALQQAVASVGPISVAIDAGHSSFQMYHSGVYDEPNCSSTQLDHGVLAVGYGTYQGKDYWLVKNSWASSWGMEGYIMMSRNKNNQCGIATQASYPLV	CATL2_HUMAN	Cathepsin L2	O60911	Homo sapiens	Proteolysis	Lysosome	Peptidase activity
	155	LOW QUALITY PROTEIN: matrilysin-like [Orbicella faveolata]	XP_020631312.1	30 kDa	0.0017	0.13838	0.21405	0.15693	0	0	0	0.0906	0.0906	0.0453	0	0	0	2	3	2	0	0	0	2	2	1	0	0	0	(K)YWADVSGLSFSR(A), (K)VLAHAFFPSDGR(A).	Unidentified	c55106_g1_i1	ESGSRIRRYKLGSKWGKKHLTYFVEYGRDLSSGEQDRIFARALKYWADVSGLSFSRASSASSADLKISFGARTHGGSSERTCAYPFDGPGKVLAHAFFPSNGRAHFDEDERYTDGTSSGTNLLWVATHEFGHSLGLHHSDVRNAVMYPYYTGYVPNFRLQQDDVNGIQAHYGK	HE_HEMPU	50 kDa hatching enzyme	P91953	Hemicentrotus pulcherrimus	Proteolysis	Extracellular matrix	Peptidase activity
	156	Zinc metalloproteinase nas-13-like [Exaiptasia pallida]	XP_020913648.1	68 kDa	0.043	0	0	0	0.063083	0.022049	0.090785	0	0	0	0.0848	0.0294	0.0848	0	0	0	3	1	4	0	0	0	3	1	3	Unidentified	(K)NSGECGNNAGWMSSNCPK(S),(R)VCGEPDSDCKDDMPVACEEWAK(R),(R)YECSNNPIWMNK(N)	Unidentified	Unidentified	NAS15_CAEEL	Zinc metalloproteinase nas-15	P55115	Caenorhabditis elegans	Proteolysis	Extracellular region	Peptidase activity
	157	Transcriptional enhancer factor TEF-1-like [Exaiptasia pallida]	XP_020893953.1	50 kDa	0.0068	0.080314	0.12149	0.1412	0	0	0	0.0519	0.0745	0.0948	0	0	0	2	3	3	0	0	0	1	2	2	0	0	0	(K)HLFVHLGPNTNFTDPLLEAVDIR(Q), (K)GPQSVFFLVK(F), (K)YMMNSVLENFTILQVVTNR(E).	Unidentified	c2264_g1_i1	MTNSADEGKAKSPVDMANDAEGVWSPDIEQSFQEALAIYPPCGRRKIILSDEGKMYGRNELIARYIKLRTGKTRTRKQVSSHLQVLARKKVSSHIQVLARKTAKDIQGKFKDQAARDKALQTMASMSSAQIVSASVIHNKNMSGASGFSGNENQSYQYWQQPGSNQQAAGYGSVNQSPYGSPIQPGIQGGNVVSTATASSSAGAVVNSQDEIVRSTTFGDTRTVVTSPPSGAASWASNRQASHMPLRLLEFSAFLEQQTMDPETYHKHLFVHLGPNTNFTDPLLEAVDIRQIYDKFPEKKGGLKELYDKGPQSVFFLVKFWADLNTSIHDEAGAFYGVSSTYESSENMTITCSTKVCSFGKQVVEKVETEYGHFENGSFLYRIHRSPMCEYMINFIHKL…	TEAD1_HUMAN	Transcriptional enhancer factor TEF-1	P28347	Homo sapiens	Transcription	Nucleus	Protein binding
	158	Glyceraldehyde-3-phosphate dehydrogenase-like [Exaiptasia pallida]	XP_020895288.1	36 kDa	0.0049	0.1125	0.10977	0.060994	0	0	0	0.0751	0.0751	0.042	0	0	0	2	2	1	0	0	0	2	2	1	0	0	0	(R)VPVPDVSVVDLTVR(L), (K)AGLALNDNFVK(L).	Unidentified	c21744_g1_i1	YLSNRRRLLLCKTSAPSRKDKILPRHLIKMTIKFGINGFGRIGRLVCRASLERDDVQLVAVNDPFLDAEYMAYLFKYDSTHGRFKGDVKVVDGKLVINGKTVEVYANKDPTTIPWGKHGADTVVESTGVFTTIEKAGAHLKGGAKKVIISAPSADAPMFVMGVNEEKYEPSMNVVSNASCTTNCLAPIAKVVNDNFGIVEGLMTTIHAYTATQKTVDGPSGKKWRDGRGAHQNVIPASTGAAKAVGKVIPELNGKLTGMAFRVPVPDVSVVDLTVRLKNGASYDQIKSAVKKASESKEMGRFLGYTEDDVVSSDFIGNTTSSIFDAKAGLSLNDNFVKLVAWYDNEYGYSHRVIDLLVYMAKRA	G3P_RHIMI	Glyceraldehyde-3-phosphate dehydrogenase	Q8NK47	Rhizomucor miehei	Metabolic process	Cytoplasm	Oxidoreductase activity
	159	Prolyl tripeptidyl peptidase 5 isofrom X1. uncharacterized protein LOC110247304 [Exaiptasia pallida]	XP_020909392.1	12 kDa	0.029	0	0	0	0.11574	0.12734	0.27796	0	0	0	0.139	0.139	0.194	0	0	0	1	1	2	0	0	0	1	1	2	Unidentified	(R)IDPLDKGFVYWSEGLPEEGGR(I),(K)GFVYWSEGLPEEGGR(I).	Unidentified	Unidentified	SYC_BURTA	Cysteine--tRNA ligase	Q2SX78	Burkholderia thailandensis	Translation	Cytoplasm	Ligase activity
	160	Cubilin-like [Exaiptasia pallida]	XP_020916045.1	185 kDa	0.0058	0	0	0	0.014651	0.0079891	0.015433	0	0	0	0.0126	0.0054	0.0126	0	0	0	2	1	2	0	0	0	2	1	2	Unidentified	(K)YVYIESTGR(S),(R)FCGFYPFGFGVK(V)	Unidentified	Unidentified	CUBN_RAT	Cubilin	O70244	Rattus norvegicus	Lipid metabolism	Membrane	Protein binding
	161	Chaperonin GroEL. hypothetical protein NEMVEDRAFT_v1g149214, partial [Nematostella vectensis]	XP_001620090.1	35 kDa	0.0036	0	0	0	0.082063	0.090285	0.1359	0	0	0	0.0336	0.0336	0.0336	0	0	0	2	2	3	0	0	0	1	2	2	Unidentified	(K)DRVDDALHAT(A),(R)VDDALHAT(A)	Unidentified	Unidentified	CH60_GRAFK	60 kDa chaperonin	A0M7D9	Gramella forsetii	Protein folding	Cytoplasm	Chaperone
	162	Peroxiredoxin-4-like [Exaiptasia pallida]	XP_020914260.1	29 kDa	0.13	0.14419	0.22352	0.077272	0.10173	0	0.050639	0.0873	0.127	0.0317	0.0833	0	0.0317	1	2	0	1	0	0	1	2	0	1	0	0	(K)YPLLSDLNQQISK(D),(K)DYGVLLENEGHTLR(G),(R)GLFIIDDK(G)	(R)GLFIIDDK(G),(K)HGEVCPAGWKPGK(D),(R)LVQAFQYTDK(H)	c20800_g1_i1	MASLVILSILLAFFTSQSFANKVEDEDQCRTYAGGQVYPERTRIPEHAMHWSKARISKPAPFWEGNAVVNGEFKALKLSDFLGKYLVFFFYPLDFTFVCPTEIIAFSDRIDEFRAINAEVVACSVDSVFTHLAWINTPRKEGGLGKLKYPLLSDLNQQISKDYGVLLENEGHTLRGLFIIDDKGILRQITMNDLPVGRSVDETLRLVQAFQYTDKHGEVCPAGWKPGKDTIIPDPKEKVKYFEKQAEKKSEL	PRDX4_MOUSE	Peroxiredoxin-4	O08807	Mus musculus	Oxidation-reduction process	Cytoplasm	Peroxiredoxin activity
	163	Heat shock protein beta-6-like [Exaiptasia pallida]	XP_020903552.1	22 kDa	0.013	0	0	0	0.062182	0.14711	0.14085	0	0	0	0.08	0.13	0.08	0	0	0	1	2	2	0	0	0	1	2	1	Unidentified	(K)HHSEGEFGSETSEFHR(T),(K)DVDMDSVVSK(L)	Unidentified	Unidentified	HSPB2_RAT	Heat shock protein beta-2	O35878	Rattus norvegicus	Stress response	Cytoplasm	Unknown
	164	Predicted protein [Nematostella vectensis]	XP_001639268.1 (+2)	25 kDa	< 0.00010	0.16577	0.16175	0.18799	0	0	0	0.0982	0.0982	0.0982	0	0	0	2	2	2	0	0	0	2	2	2	0	0	0	(K)LSILYPATTGR(N), (R)VIDSLQLTATK(K).	Unidentified	c26896_g1_i1	MVNLGDIFPDFKAESSDGTIQFHQFIEGTWAILFSHPADYTPVCTTELGRVSQLAGEFKKRGVKMIALSCDDVDSHKGWIKDVNAYSGEGFPYPILADPKRELAVQLGMVDPDEKDAKGLPLTCRAVFIIGPDKRLKLSILYPATTGRNFNEILRVIDSLQLTATKKVATPVDWKSGEDCMVLPSISQEDAAKLFPKGVKIKEVPSGKQYLRYTPQPE	PRDX6_CHICK	Peroxiredoxin-6	Q5ZJF4	Gallus gallus	Oxidation-reduction process	Lysosome	Oxidoreductase activity
	165	CUB and peptidase domain-containing protein 2-like [Exaiptasia pallida]	XP_020897972.1	34 kDa	0.083	0	0	0	0.040491	0.044548	0.1409	0	0	0	0.0314	0.0314	0.101	0	0	0	1	1	3	0	0	0	1	1	3	Unidentified	(R)IVGGTEAPK(G),(K)GAWPWQAQLR(S),(K)RPYGMAHDISLLK(L)	Unidentified	Unidentified	CPP1_ACRMI	CUB and peptidase domain-containing protein 1	B8V7S0	Acropora millepora	Proteolysis	Cytoplasm	Peptidase activity
	166	Predicted protein, partial [Nematostella vectensis]	XP_001629218.1	47 kDa	0.024	0.13252	0.083249	0.046736	0	0	0	0.0951	0.0557	0.0186	0	0	0	2	2	1	0	0	0	2	2	1	0	0	0	(K)DLWLVEFFAPWCGHCQR(L),(R)TGIDEFLR(T),(R)GDSLPELSSIEAWDGK(D)	Unidentified	c27374_g1_i1	MDVHQSVGGPYGIRGFPTIKIFGANKNSPKDYNGPRTAQGVADAAMSAAKEAVSQRLSGGGRSSGGGRQGGGSGGSGKNAVVELTDANFEKEVLNSKDLWLVEFFAPWCGHCQRLAPEWAKAASELEGKVKVGAVDATVHTVTASRYQVQGYPSIKVFAAGVKDSHSVEDYQGGRTASDIVQFALEKMAASIEPPEIEQAVESKVLAGNCNEKPLCVISFLPHILDSGAEGRNKYLSVLKELGEKYKKNLWGWLWSEAGAQQKLEESLEIGGFGYPALVAVNARKKKYATLRGSFDRTGIDEFLRTVAVGRGATSALKGDSLPELSTVEAWDGKDGQLPQEEDIDLSDVDLDDEGDKKKEEL	PDIA6_RAT	Protein disulfide-isomerase A6	Q63081	Rattus norvegicus	Protein folding	Endoplasmic reticulum	Isomerase activity
	167	Predicted protein [Nematostella vectensis]	XP_001642026.1	62 kDa	0.16	0.064074	0.03045	0	0	0	0	0.0504	0.0198	0	0	0	0	2	1	0	0	0	0	2	1	0	0	0	0	(R)AALLEWPHAVGIALDTK(G), (R)GDLGIEIPAEK(V).	Unidentified	c31736_g1_i1	MSAKGARAEYVHYVEQRHKHWMGSRASSYLEYLCELDIDREPVTIRNSGLICTIGPASRSVETIVQLIENGLNIARLNFSHGTHEYHKETIANIRRAALIEWPHAVGIALDTKGPEIRTGLLKGGGSAEISLKKGQKLKLSTNKDMFDKGDENTIFVDYANISKVVPIGGIVYVDDGLISLKVTDKGADFMMTEVQNDGNLGSKKGVNLPNCEVDLPAVSEQDKKDIAFAMEEDLDMIFASFIRKPSDIEEIRQLLGDKAKAIKIVAKIENHEGVRRFNEIVDAADGIMVARGDLGIEIPAEKVFLAQKMMISRCNRVGKPVICATQMLESMVVNPRPTRAEASDVANAILDGADCVMLSGETAKGRYPVNAVRMMHSICREAEAAIFSKQLFDELRHS…	KPYM_HUMAN	Pyruvate kinase PKM	P14618	Homo sapiens	Metabolic process	Cytoplasm	Kinase activity
	168	Myosin-10-like [Exaiptasia pallida]	XP_020901392.1	228 kDa	0.14	0	0	0	0.011874	0	0.018896	0	0	0	0.0198	0	0.0183	0	0	0	2	0	3	0	0	0	2	0	3	Unidentified	(R)ELEQELESLKSELEESIDTTAAATEMR(T),(K)TLETQLTEANIR(L).	Unidentified	Unidentified	MYH10_MOUSE	Myosin-10	Q61879	Mus musculus	Cell adhesion	Cytoskeleton	Actin binding
	169	Drebrin-like protein isoform X1 [Exaiptasia pallida]	XP_020895566.1 (+1)	66 kDa	0.46	0.059922	0.028524	0	0.020624	0	0.021726	0.0382	0.0226	0	0.026	0	0.026	2	1	0	0	0	0	2	1	0	0	0	0	(K)TWQDIFDDK(S), (K)SSTNWAVFGYEGK(T).	Unidentified	c30729_g1_i1	MAVDLKKNRSELLKTWQDIFDDKSSTNWAVFGYEGKTNTLKVQETGEDGIEELADELNDGKILYAGIKVTDPNTNLPKIVFINWQGEGVPSTRKGGCANHVRDIENLFRGAHVIINARNEDDVEESVILEKVKKASGAAYSAHKEKPQKAEPILPVGSVYKRTNVTKEIDVNKRDKFWGSEEKKEQERIEEEKKKKIQERQESERKRKEREAKEAEKREVEYRERSKSIEEQRKHARELEEQKKEEEKRRWESQRAEDESQDREQKARADSLRKERMKEAESLIAKGKTEKPAFEERKAPPPAPKKKPPAALPQKRAAVPPPQPKPKREPEPEVEPEPEPTPEPEPAITRATIMPVPKRPPDSDEEPEEEDWGDEPAQQEIPHTQAEPDDSTYEEVPEP…	DBNL_DROME	Drebrin-like protein	Q9VU84	Drosophila melanogaster	Cell migration	Cytoskeleton	Actin binding
	170	Ornithine aminotransferase, mitochondrial-like [Exaiptasia pallida]	XP_020909112.1	47 kDa	0.94	0	0.039828	0.04629	0.059599	0.031682	0	0	0.0255	0.0255	0.0626	0.0371	0	0	1	1	2	1	0	0	1	1	2	1	0	(K)IVFAEGNFWGR(T)	(R)AFYNNVLGEYEEFVTK(L),(K)IVFAEGNFWGR(T)	Unidentified	Unidentified	OAT_HUMAN	Ornithine aminotransferase, mitochondrial	P04181	Homo sapiens	Metabolic process	Mitochondrion	Transferase activity
	171	Calponin-3-like [Exaiptasia pallida]	XP_020907072.1	16 kDa	< 0.00010	0	0	0	0.19625	0.21591	0.20673	0	0	0	0.167	0.167	0.167	0	0	0	2	2	2	0	0	0	2	2	2	Unidentified	(K)HGDKDEFAASLK(N),(K)QNVWGVVLALR(A)	Unidentified	Unidentified	MYPH_ECHGR	Myophilin	Q24799	Echinococcus granulosus	Unknown	Unknown	Unknown
	172	Neural cell adhesion molecule 1-like [Exaiptasia pallida]	XP_020911328.1	89 kDa	< 0.00010	0	0	0	0.031025	0.034133	0.032683	0	0	0	0.029	0.029	0.029	0	0	0	2	2	2	0	0	0	2	2	2	Unidentified	(K)STVQFDTTNSR(Y),(R)YSITGNCINIAK(L)	Unidentified	Unidentified	NCAM1_MOUSE	Neural cell adhesion molecule 1	P13595	Mus musculus	Cell adhesion	Membrane	Protein binding
	173	Major vault protein-like [Exaiptasia pallida]	XP_020915905.1	95 kDa	< 0.00010	0.04112	0.040123	0.046633	0	0	0	0.0377	0.0377	0.0377	0	0	0	2	2	2	0	0	0	2	2	2	0	0	0	(R)IPPYYYIHVLDQNTNVTK(V), (R)LAQDPFPLFPGEVLK(H), (R)VAGDEWLFEGPGTLIPR(K).	Unidentified	c29565_g1_i1	MSSRATEGESIYRIPPYYYIHVLDQNTNVTKVEVGPKTFIRQDNEKVIVGPEKMITIPPRHYCIIENPVMRDPKEGKVIVDEYGQIRLRHADQEIRLAQDPFPLFPGEVLKLGCTPLRIVMANSALRLRAVLDFEDESGEKRVAGDEWLFEGPGTLIPRKEVEVIETVRATVIQANQAIKLRARKETRDREGHLRVTGEIWLVRRVGAYLPGAYEEVVAVVDAFVLTDKLALHLVATGTFKDVYGITRKNGEEWLITKDEAEAHIPDVYEEVKGLVDITTLNNRQYCVIQNPIGKDGKPQLGQKKLVKGEKSFFLMPGECLERGTQDVYILGEDEGLILKCNEAFTDTDEDEEEITRRPGDRWMIRGPSEYIPPVEVEVIDRRKAIPLDNNEGIYVRDI…	MVP_STRPU	Major vault protein	Q5EAJ7	Strongylocentrotus purpuratus	Protein transport	Nucleus	Ribonucleoprotein
	174	Calretinin-like [Exaiptasia pallida]	XP_020905743.1	26 kDa	0.0074	0	0	0	0.11208	0.057965	0.11807	0	0	0	0.0955	0.0455	0.0864	0	0	0	2	1	2	0	0	0	2	1	2	Unidentified	(K)LDSTSFYETFR(K),(K)EVMSSVDFMK(I)	Unidentified	Unidentified	CALB2_BOVIN	Calretinin	Q3ZBY3	Bos taurus	Unknown	Unknown	Metal ion binding
	175	Macrophage migration inhibitory factor homolog [Exaiptasia pallida]	XP_020893764.1	13 kDa	0.16	0	0	0	0.243	0.1183	0	0	0	0	0.224	0.112	0	0	0	0	2	1	0	0	0	0	2	1	0	Unidentified	(M)PYLQIQTNIPAAK(I),(K)EPTAIVQLTNIGR(H)	Unidentified	Unidentified	MIFH_TRITR	Macrophage migration inhibitory factor homolog	P81748	Trichuris trichiura	Signal transduction	Extracellular region	Isomerase activity
	176	Laminin subunit alpha-like [Exaiptasia pallida]	XP_020913308.1	246 kDa	0.12	0	0	0	0	0.0059961	0.011558	0	0	0	0	0.0058	0.0116	1	1	1	0	1	2	0	0	0	0	1	2	Unidentified	(R)AGVASGLANCDER(T),(R)GCQDCQCDISGVR(G)	Unidentified	Unidentified	LAMA_DROME	Laminin subunit alpha	Q00174	Drosophila melanogaster	Cell adhesion	Extracellular region	Protein binding
	177	Isochorismatase domain-containing protein 2-like [Exaiptasia pallida]	XP_020900581.1	22 kDa	0.31	0.19163	0.086895	0	0	0.069124	0	0.127	0.0558	0	0	0.0761	0	2	1	0	0	0	0	2	1	0	0	0	0	(K)IPILATEQYPK(G), (R)NYEVHILADGVSSR(T).	Unidentified	c25037_g1_i1	MAARLGRLATESTAFLLCDMQEKFRPSIRYFPEIIKVAQRMVTAGNIMKIPIIATEQYPKGLGSTVSDIDTSEFKEKIFPKTVFSMVIPEVEEELKKMPNVKSVVLFGIETQVCILQTTLDLLERNYEVHILADGVSSRTMVERMFALDRLRQSGAFITTSESVLFMLLGNSKHPNFKEVQALVKTAAPDSGLLSKV	ISOC2_XENLA	Isochorismatase domain-containing protein 2	Q5PQ71	Xenopus laevis	Unknown	Unknown	Unknown
	178	PREDICTED: uncharacterized protein LOC107355583 isoform X1 [Acropora digitifera]	XP_015777656.1 (+1)	68 kDa	0.02	0.057698	0.086494	0.03195	0	0	0	0.0408	0.0425	0.0255	0	0	0	2	3	1	0	0	0	2	3	1	0	0	0	(R)KEEYmSAVGLAmLFDR(S), (K)EEYmSAVGLAmLFDR(S), (R)AmWDEWDLR(E).	Unidentified	c20714_g1_i1	MAFRQRIRKMNKKIREVGEDRKALMHNELFVLDNSLRESTVGQLRGHTIENKWKIYNEIKKIGYQNIIVASFSHMTRLGDTFCQQLAYEGEDFSKLWAFSEFLESIDKSRVPNTEAVPIGLKKCRDLGLYNVIIEFDLVYKGIDYTKFTAEKICQLCSDRMKWIRENLSPDARILFNLRDFSDAMKKEPERQFHVINYLSSLPKSERPFGLIYEESGKYLPEEVGAWTAAVREEMDDCGFKEGHLLVHVHEQWGASVTTQLECIANGADGVWASLCEEGASMGHCSSTMTLMNMIRIGNKRVLEQYNCTKLREAAINVQKITTGKPPHAKQPVYGERALDMVFGMPNFAPDKKTFNMAEFFGEEPVMRMTTLASKSMVVTRLKRLFGEDPQFTEERAQR…	CIMA_AQUAE	(R)-citramalate synthase	O66682	Aquifex aeolicus	Metabolic process	Unknown	Transferase activity
	179	Hephaestin-like protein [Exaiptasia pallida]	XP_020906986.1	126 kDa	0.024	0	0	0	0.010665	0.02377	0.011235	0	0	0	0.0134	0.0259	0.0134	0	0	0	1	2	1	0	0	0	1	2	1	Unidentified	(K)DANTGLVGPLIVCK(R),(R)GDVYDLFPGVFATVK(M)	Unidentified	Unidentified	HEPHL_ACRMI	Hephaestin-like protein	B3EWZ9	Acropora millepora	Oxidation-reduction process	Membrane	Oxidoreductase activity
	180	High mobility group protein B1-like [Exaiptasia pallida]	XP_020911699.1	43 kDa	0.026	0	0	0	0.031505	0.071961	0.033188	0	0	0	0.0373	0.0667	0.0373	0	0	0	1	2	1	0	0	0	1	2	1	Unidentified	(K)RPLSAYLYFTK(E),(K)RNPTAYFIFLSEFR(K)	Unidentified	Unidentified	HMGB3_BOVIN	High mobility group protein B3	Q32L31	Bos taurus	Translation	Nucleus	Nucleotide binding
	181	C3 and PZP-like alpha-2-macroglobulin domain-containing protein 8 isoform X1 [Exaiptasia pallida]	XP_020898336.1 (+1)	190 kDa	0.023	0	0	0	0.0070742	0.015699	0.0074521	0	0	0	0.00761	0.0158	0.00819	0	0	0	1	2	1	0	0	0	1	2	1	Unidentified	(R)FFKPGLPFYGQLR(V),(K)AAPGSTVALAGVDK(S)	Unidentified	Unidentified	A2MG_BOVIN	Alpha-2-macroglobulin	Q7SIH1	Bos taurus	Regulation of proteolysis	Extracellular region	Protease inhibitor
	182	Pyruvate kinase PKM-like [Exaiptasia pallida]	XP_020901568.1	61 kDa	0.012	0.03161	0.063351	0.035849	0	0	0	0.0236	0.0399	0.0236	0	0	0	1	2	1	0	0	0	1	2	1	0	0	0	(R)NSGIICTIGPASR(S), (R)LDFALNMGK(T).	Unidentified	c31736_g1_i1	MSAKGARAEYVHYVEQRHKHWMGSRASSYLEYLCELDIDREPVTIRNSGLICTIGPASRSVETIVQLIENGLNIARLNFSHGTHEYHKETIANIRRAALIEWPHAVGIALDTKGPEIRTGLLKGGGSAEISLKKGQKLKLSTNKDMFDKGDENTIFVDYANISKVVPIGGIVYVDDGLISLKVTDKGADFMMTEVQNDGNLGSKKGVNLPNCEVDLPAVSEQDKKDIAFAMEEDLDMIFASFIRKPSDIEEIRQLLGDKAKAIKIVAKIENHEGVRRFNEIVDAADGIMVARGDLGIEIPAEKVFLAQKMMISRCNRVGKPVICATQMLESMVVNPRPTRAEASDVANAILDGADCVMLSGETAKGRYPVNAVRMMHSICREAEAAIFSKQLFDELRHS…	KPYM_HUMAN	Pyruvate kinase PKM	P14618	Homo sapiens	Metabolic process	Cytoplasm	Kinase activity
	183	DNA-directed RNA plymerase subunit beta. hypothetical protein NEMVEDRAFT_v1g225894, partial [Nematostella vectensis]	XP_001617672.1	44 kDa	0.026	0	0	0	0.030939	0.070623	0.032592	0	0	0	0.0222	0.042	0.0222	0	0	0	1	2	1	0	0	0	1	2	1	Unidentified	(R)KGLADTALK(T),(R)DITGGLPR(V)	Unidentified	Unidentified	RPOC_CYTH3	DNA-directed RNA polymerase subunit beta	Q11QA6	Cytophaga hutchinsonii	Transcription	Nucleus	Transferase activity
	184	Gamma-glutamyltranspeptidase 1-like [Exaiptasia pallida]	XP_020898660.1	69 kDa	0.13	0	0	0	0.06211	0	0.042595	0	0	0	0.058	0	0.0338	0	0	0	3	0	2	0	0	0	2	0	1	Unidentified	(K)EINAEGGIFSVDDLK(E),(R)YIPTTLAQVFMNYYWFGDSLK(D)	Unidentified	Unidentified	GGT1_PIG	Glutathione hydrolase 1 proenzyme	P20735	Sus scrofa	Metabolic process	Membrane	Transferase activity
	185	Predicted protein [Nematostella vectensis]	XP_001641545.1 (+2)	24 kDa	0.2	0	0	0	0.058282	0.13727	0.061395	0	0	0	0.0648	0.116	0.0509	0	0	0	1	2	1	0	0	0	1	2	1	Unidentified	(K)LVLLGESAVGK(S),(K)TAMNVNDIFLAIAK(K)	Unidentified	Unidentified	RAB5C_CANLF	Ras-related protein Rab-5C	P51147	Canis lupus familiaris	Protein transport	Endosome	Nucleotide binding
	186	Poly(U)-specific endoribonuclease-B-like [Exaiptasia pallida]	XP_020917145.1	33 kDa	0.027	0	0	0	0.042043	0.097211	0.044289	0	0	0	0.0424	0.0919	0.0424	0	0	0	1	2	1	0	0	0	1	2	1	Unidentified	(R)EVVTQEEINENR(I),(R)DSSGFEHVFVGETR(D)	Unidentified	Unidentified	ENDUB_DANRE	Poly(U)-specific endoribonuclease-B	Q503V9	Danio rerio	Endocytosis	Endosome	Nucleotide binding
	187	Calnexin-like [Exaiptasia pallida]	XP_020910870.1	65 kDa	0.019	0	0	0	0.020838	0.022925	0.045007	0	0	0	0.028	0.028	0.0717	0	0	0	1	1	2	0	0	0	1	1	2	Unidentified	(K)LIADGEGFSPETFTDK(S),(R)YTIMFGPDK(C),(K)THLFTLVVKPDNTFEVLVDQESVSK(G)	Unidentified	Unidentified	CALX_MOUSE	Calnexin	P35564	Mus musculus	Protein folding	Endoplasmic reticulum	Chaperone
	188	Serpin B6-like [Exaiptasia pallida]	XP_020902588.1	44 kDa	0.88	0.043518	0.042463	0	0.030703	0	0.067086	0.0256	0.0256	0	0.0256	0	0.0563	1	1	0	1	0	2	1	1	0	1	0	2	(R)ATLVNAIYFK(G)	(R)ATLVNAIYFK(G),(K)ADFTGITVGPEK(L)	c26903_g1_i1	MSAVATAVNQFAVDLHAVLKSQEKFLGDNLFYSPTSLSIALGMVYSGARGSTAEQIANGFHWKSLEVEKLNESMKSFSDALTSSNTASNELNTANRLFLQQGFEVIQEFTDCCKKFYDAETALVDYKKDFEGARKLINTWVEEKTKDKIKELLPSGSLNSLTRATLVNAIYFKGIWEKQFEKAHTYDSTFFTSLNKEMKIKMMFQKSKFKFLEARNLDCQLLEMPYTGGDLSMVILLPNEIEGLSKLEEKLTYDALQGALTSVTKARPLEVEVSIPKFSMTRQFELKEILQRMGMGDMFDQVESNFTGLIKGPGKLYVSEVFHKAFVDVNEEGTEAAAATAAVMMTRMMVRPPPSFTADHPFLFLIRHCKSDAILFLGRVAKPESKE	ILEU_XENTR	Leukocyte elastase inhibitor	Q5I0S8	Xenopus tropicalis	Regulation of proteolysis	Extracellular region	Protease inhibitor
	189	Unconventional myosin-XVIIIa-like isoform X1 [Exaiptasia pallida]	XP_020914889.1 (+1)	249 kDa	0.37	0	0	0	0	0.011946	0.011438	0	0	0	0	0.0142	0.0142	0	0	0	0	2	2	0	0	0	0	2	2	Unidentified	(R)mSGDFGFALR(R), (K)TVHFVEPVGPNTATGILPGDR(L).	Unidentified	Unidentified	MY18A_HUMAN	Unconventional myosin-XVIIIa	Q92614	Homo sapiens	Cellular component organization	Cytoskeleton	Protein binding
	190	Inactive tyrosine-protein kinase 7-like [Exaiptasia pallida]	XP_020896825.1	114 kDa	0.012	0	0	0	0.023943	0.012986	0.012434	0	0	0	0.0204	0.0107	0.0107	0	0	0	2	1	1	0	0	0	2	1	1	Unidentified	(K)INSQNALVFK(K),(K)EALGGDNLPSR(F)	Unidentified	Unidentified	PTK7_MOUSE	Inactive tyrosine-protein kinase 7	Q8BKG3	Mouse	Phosphorylation	Membrane	Kinase activity
	191	Lipoxygenase homology domain-containing protein 1-like isoform X1 [Orbicella faveolata]	XP_020601065.1 (+1)	273 kDa	0.011	0	0	0	0.0099041	0.0054159	0.0051858	0	0	0	0.0074	0.0037	0.0037	0	0	0	2	1	1	0	0	0	2	1	1	Unidentified	(R)LYTVSANIR(D), (K)SPDVGEITK(L).	Unidentified	Unidentified	LOXH1_HUMAN	Lipoxygenase homology domain-containing protein 1	Q8IVV2	Homo sapiens	Cellular detoxification	Cell projection	Antioxidant activity
	192	A disintegrin and metalloproteinase with thrombospondin motifs 16-like [Exaiptasia pallida]	XP_020906830.1	105 kDa	0.018	0	0	0	0.01282	0.014104	0.027427	0	0	0	0.0125	0.00935	0.0218	0	0	0	1	1	2	0	0	0	1	1	2	Unidentified	(K)LYDWVYNPK(R),(K)TCNDGSLGQQSR(E)	Unidentified	Unidentified	ATS16_HUMAN	A disintegrin and metalloproteinase with thrombospondin motifs 16	Q8TE57	Homo sapiens	Proteolysis	Extracellular region	Peptidase activity
	193	Elongation factor 1-gamma-like [Exaiptasia pallida]	XP_020896757.1	49 kDa	0.026	0	0	0	0.027931	0.063532	0.029423	0	0	0	0.0238	0.0618	0.0238	0	0	0	1	2	1	0	0	0	1	2	1	Unidentified	(K)VPAFETSDGK(Y),(K)VYMNEETDVSIPYFWK(N)	Unidentified	Unidentified	EF1G_MOUSE	Elongation factor 1-gamma	Q9D8N0	Mus musculus	Protein biosynthesis	Cytoplasm	Elongation factor
	194	Extended synaptotagmin-3-like isoform X1 [Exaiptasia pallida]	XP_020906060.1 (+2)	87 kDa	0.16	0.045017	0.021557	0	0	0	0	0.0401	0.0207	0	0	0	0	2	1	0	0	0	0	2	1	0	0	0	0	(R)GVIDDVVASFVVLPNR(I), (K)TIQDSISPVWEEPFR(F).	Unidentified	c19120_g1_i1	MSKKPPEISEGKNPAPTSASIQNQSPGKTEEAAKPMALGSDEMMIVKVLLGFLKYAGAALLIWIFGWFGFGFTWIIIGSLIFTFWMKNQEKKTKKKNIARDVAKHEETAVEARIDELPAWVFFPDVERAEWLNKMIVQLWPYINDMVIKILKEKVEPEIQKNVPGFLSSIYFDELSLGDQPPRIGGIKTYTQNVKRSEIIMDVDLIYAGNSDIRLSVKGISVGIEDLQLRGTLRVILSPLIPTSPLVGGISVFFLNRPDIDFDLTNLLNILDIPGLSDILRGVIDDVVASFVVLPNRITVPLTDIDPYKLKFPLPDGVLRIHVIEAKDLVKKDIGVFKKGSSDPYAVIKVGAQTFKTETKDETLNPKWDEVFEVFVDNSQGQKIKIHLFDQDKTSDDES…	ESYT3_XENTR	Extended synaptotagmin-3	Q5M7N9	Xenopus tropicalis	Lipid transport	Membrane	Lipid binding
	195	Catenin beta-like [Exaiptasia pallida]	XP_020895849.1	82 kDa	0.042	0.023328	0.046431	0.082568	0	0	0	0.0377	0.0606	0.0539	0	0	0	1	2	3	0	0	0	1	2	3	0	0	0	(K)LLGSQVEAVVFYAITTLHNLLLHQEGAK(M), (R)MDDIVEGTVGALHILSR(E), (K)LIILASGGPAELVR(I), (R)FGGIEALVR(T).	Unidentified	c31556_g1_i1	METGHMGLPRGEMNKNAQTTMWHQQYHDSGIMSGATTTAHSVKGDEDDDYMKTTHMSFEWEQSFTDQEMQAMNEQFVSTRSQRIRQAMFPETLEEGMQIPSTQFDATSATAVQRLAEPSLMLKQAVVNLINYQDDADLATRAIPELTKLLNDEDQVVVGQAAMMVHQLSKKDASRHAIMNSPQMVAALVRALNNATDVETTRCAAGTLHNLSHHRQGLLSIFKSGGIPALVKLLGSQVEAVVFYAITTLHNLLLHQEGAKMAVRLAGGLQKMVALLGRTNVKFLAIVTDCLHVLAYGNQESKLIILASGGPAELVRIMKSYTYEKLLFTTSRVLKVLSVDTDNKMAIVEAGGMQALAMHLGHQSNRLVQNCLWTLRNLSDAATKEEGLDNLLQMLVQLL…	CTNB_URECA	Catenin beta	P35224	Urechis caupo	Cell adhesion	Cytoskeleton	Protein binding
	196	Laminin subunit beta-1-like [Exaiptasia pallida]	XP_020906917.1	192 kDa	0.0058	0	0	0	0.014152	0.0077195	0.014908	0	0	0	0.00576	0.00576	0.0121	0	0	0	1	1	2	0	0	0	1	1	2	Unidentified	(K)EQEECSYCDSR(N),(R)TSAANSEIDR(L)	Unidentified	Unidentified	LAMB1_HUMAN	Laminin subunit beta-1	P07942	Homo sapiens	Cell adhesion	Extracellular region	Structural molecule activity
	197	Laminin subunit alpha-2-like [Exaiptasia pallida]	XP_020913156.1	186 kDa	0.023	0	0	0	0.0072268	0.016041	0.0076129	0	0	0	0.00836	0.0143	0.00836	0	0	0	1	2	1	0	0	0	1	2	1	Unidentified	(R)NIINIAGGIADTLK(S),(K)GDFIVLELVK(G)	Unidentified	Unidentified	LAMA4_HUMAN	Laminin subunit alpha-4	Q16363	Homo sapiens	Cell adhesion	Extracellular region	Structural molecule activity
	198	Allograft inflammatory factor 1-like [Exaiptasia pallida]	XP_020916259.1	17 kDa	0.53	0	0	0.13008	0.17767	0.089027	0	0	0	0.0541	0.223	0.0541	0	0	0	0	2	1	0	0	0	0	2	1	0	Unidentified	(K)MIAEVDTNNSGTIHYNEFLTMMLGK(K),(K)LILMFEEK(K)	Unidentified	Unidentified	AIF1_HUMAN	Allograft inflammatory factor 1	P55008	Homo sapiens	Actin filament polymerization	Cytoplasm	Protein binding
	199	Eukaryotic translation initiation factor 3 subunit B-like [Exaiptasia pallida]	XP_020904265.1	84 kDa	0.16	0.022678	0.045113	0	0	0	0	0.0206	0.0385	0	0	0	0	1	2	0	0	0	0	1	2	0	0	0	0	(K)TSILWNSPQEPIMVK(E), (K)VDNGYFIWSFQGK(L).	Unidentified	c30024_g1_i1	MADEKSHEDEKSDVEGEETPQNDEKMVNGDENDSEFDDPEGFVDDITEEELLGDIISQRPKEIEGTESIVVVDNVPVIGQERSEKLKNVIRKVFSKFGKIVTEYYPLLDGQTKGYIFLEFSNANDAARAVKTANGYKLDKHHVFAVNHFEDFMKLLDPKEDWKPPAKQSYNQQENLRSWLQDPDCNDQYSVIHGEKTSILWNSPQEPLMVKERPNWTETYVLWSPKGTYLSTFHGQGVALWGGEEFKRIMRFSHPGVQLIDFSPCERYLVSFSPIPSSSEDPSGIIIWDIRTGQKRRGFLSGDTSQWPAFKWSHDGKYFARMGTDSISVYETPSFGLIDKKSLKVEGVKDFQWSPSNNYIAYWTPEDKDTPARVTIMEIPDRKEIRVKNLFNVSDCKLY…	EIF3B_HUMAN	Eukaryotic translation initiation factor 3 subunit B	P55884	Homo sapiens	Protein biosynthesis	Cytosol	Nucleotide binding
	200	Calcineurin subunit B type 1 [Exaiptasia pallida]	XP_020907153.1	19 kDa	0.019	0.22404	0.10048	0.11678	0	0	0	0.335	0.171	0.171	0	0	0	2	1	1	0	0	0	2	1	1	0	0	0	(R)KLDLDNSGALSVEEFMSLPELQQNPLVQR(V), (R)VIDIFDSDGNGEVDFKEFIEGVSQFSVK(G).	Unidentified	c29154_g1_i1	MGNEASLPSDMVTHFDADEIRRLGKRFRKLDLDNSGALSVEEFMSLPELQQNPLVQRVIDIFDSDGNGEVDFKEFIEGVSQFSVKGDKESKLRFAFRIYDMDNDGLISNGELFQVLKMMVGNNLKETQLQQIVDKTILNADKDGDGKICFSEFCAIVGNMDVHKKMVVDV	CANB1_RAT	Calcineurin subunit B type 1	P63100	Rattus norvegicus	Actin filament polymerization	Cytoplasm	Protein binding
	201	Propionyl-CoA carboxylase beta chain, mitochondrial-like isoform X1 [Exaiptasia pallida]	XP_020909523.1 (+1)	63 kDa	0.012	0.030647	0.061371	0.034756	0	0	0	0.0298	0.0491	0.0193	0	0	0	1	2	1	0	0	0	1	2	1	0	0	0	(R)IQEGVESLAGYADIFQR(N), (R)EFVDFLPLSNK(D).	Unidentified	Unidentified	Unidentified	PCCB_PIG	Propionyl-CoA carboxylase beta chain, mitochondrial	P79384	Sus scrofa	Metabolic process	Mitochondrion	Ligase activity
	END OF FILE
		Proteins exclusively identified in Anthopleura dowii				Quantitative Value (emPAI)						Percent Coverage						Exclusive Unique Spectrum Count						Exclusive Unique Peptide Count
		Refseq_Cnidaria				Anthopleura	Anthopleura	Anthopleura	Lebrunia	Lebrunia	Lebrunia	Anthopleura	Anthopleura	Anthopleura	Lebrunia	Lebrunia	Lebrunia	Anthopleura	Anthopleura	Anthopleura	Lebrunia	Lebrunia	Lebrunia	Anthopleura	Anthopleura	Anthopleura	Lebrunia	Lebrunia	Lebrunia	Tryptic peptide sequence		Anthopleura transcriptome		Uniprot
	Santos_20170717_Refseq_Cnidaria_20170801_AD1-3_LD1-3_SCAFF4	Identified Proteins (202)	Accession Number	Molecular Weight	T-Test (p-value): (p < 0.05)	AD1	AD2	AD3	LD1	LD2	LD3	AD1	AD2	AD3	LD1	LD2	LD3	AD1	AD2	AD3	LD1	LD2	LD3	AD1	AD2	AD3	LD1	LD2	LD3	Anthopleura	Lebrunia	Code	Sequence	Code	Name protein	Accession Number	Species	GO-Biological process	GO-Cellular component	GO-Molecular function
1	8	HSP-70. predicted protein [Nematostella vectensis]		72 kDa	0.00099	0.4129	0.28124	0.37193	0.018792	0.020675	0.019796	0.179	0.203	0.197	0.0244	0.0244	0.0244	6	7	5	0	0	0	4	5	4	0	0	0	(K)VEIIANDQGNR(T), (R)IINEPTAAAIAYGLDKK(V), (K)STAGDTHLGGEDFDNK(M), (R)TLSSSTQASIEIDSLFEGIDFYTSITR(A), (K)SINPDEAVAYGAAVQAAILHGDKDDTVK(D), (R)GVPQIEVTFDIDANGILNVSAVDK(S), (K)NSLESYAYSMK(S), (K)FELTGIPPAPR(G).	unidentified	c27026_g1_i1	MAKAPAVGIDLGTTYSCVGVFQHGKVEIIANDQGNRTTPSYVAFTDTERLVGDPAKNQVAMNPINTVFDAKRLIGRRFEDPGVQDDMTHWPFQVISEGGRPKIRVEFKGETKTFFAEEISSMVLNKMKETAEAYLGTKVTDAVITVPAYFNDSQRQATKDAGVISGINVLRIINEPTAAAIAYGLDKKVGAERNVLIFDLGGGTFDVSILSIEEGIFEVKSTAGDTHLGGEDFDNKMVTHFVEEFKRKYKKNLTSNKRALRRLRTACERAKRTLSSSTQASIEIDSLFEGIDFYTSITRARFEELNSELFRKTKEPVEKSLRDAKLGKNEIHDIVLVGGSTRIPKIQSILREIFTDKELNKSINPDEAVAYGAAVQAAILSGDKHENVQDLLLLDVAPL…	HSP7D_MANSE	Heat shock 70 kDa protein cognate 4	Q9U639	Manduca sexta	Stress response	Nucleus	Nucleotide binding
2	13	Malate dehydrogenase, mitochondrial-like [Exaiptasia pallida]	XP_020897635.1	36 kDa	0.0058	0.40796	0.39807	0.67971	0	0	0	0.182	0.182	0.214	0	0	0	6	6	8	0	0	0	4	4	5	0	0	0	(K)VAVLGAAGGIGQPMSLLLK(Q); (K)VTSHQGPDELK(G); (R)DDLFNTNASIVQNLAEACAK(Y); (R)ILGVTTLDIVR(A); (R)IQNAGTEVVNAK(A)	unidentified	c26403_g1_i1	MLSRAVTRPQGVTTLARLSRQFSSTTQRQSKVAVLGAAGGIGQPMSLLLKQSPLVSHLALYDIVNTPGVAADLSHISTPAKVTSHQGPDELKVALEGCDIVAIPAGVPRKPGMTRDDLFNTNASIVQNLAEACAKYCPKAIICIIANPVNSTVPIASEVYKKAGVYDPERILGVTTLDIVRANTFVAEAKGLNVNDVSVPVIGGHSGVTILPLLSQATPKMSFTQEETEKLTDRIQNAGTEVVNAKAGAGSATLSMAYAGNQFIASVLEALSGKAGVVQCAFIKSDETDASYFATPLELGKNGVTKNLGMGQLSEYETKKLEEVLPELKKNIAKGEAFVNK	MDHM_PIG	Malate dehydrogenase, mitochondrial	P00346	Sus scrofa	Metabolic process	Mitochondrion	Oxidoreductase
3	33	Alpha actin 1. predicted protein [Nematostella vectensis]	XP_001633290.1	103 kDa	0.0012	0.18873	0.20797	0.13596	0	0	0	0.0938	0.0938	0.0837	0	0	0	9	10	6	0	0	0	7	7	6	0	0	0	(K)MTLGMIWTIILR(F), (K)DGLLLWCQR(K), (K)AAPFNNWLESAR(E), (R)NINEVENQILTR(D), (K)QCLVSLGYNIK(E), (K)VTFQAFVDFMTR(E), (R)ETADSDTAEQVMESFR(I), (R)AVMTYVSSYYHALTSSQQADTAAK(R)	unidentified	c29371_g1_i1	MAEDEQEYYGYYYGEEDKGLLDPAWEKQQKKTFTAWCNSHLRKLGKTIETMEEDFRDGVCLLLLLESLSGDKLTAERGRLRFHRIANVNKALDFVASKGVKLVSIGAEEIVDGNLKMTLGMIWTIILRFAIQDIAIDDAFAKDGLLLWCQRKTAPYKNVKVTNFHTSFKDGLAFCALIHRHRPDLIEYEKLKKDDPMTNLNTAFDVAEQHLDIPKMLDPEDMIENERPDERAVMTYVSSYYHALTSSQQADTAAKRIGKVLTINRDNEKMMEDYETLASDLLDWINKTIPRFQNRETDGSLADMQKKLEELRNYRGGEKPPKVEDKGALETNFNTLQTKLRLSNRPAFLPTEGRMINDVNDAWGKLEAAEKDFEDWLLIEMRRMERLAHLVNKFKHKCD…	ACTN1_CHICK	Alpha-actinin-1	P05094	Gallus gallus	Cellular component organization	Membrane	Actin binding
4	52	Beta-hezosaminidae. uncharacterized protein LOC110250538 [Exaiptasia pallida]	XP_020912807.1	98 kDa	0.00013	0.10457	0.12453	0.11859	0	0	0.01454	0.0698	0.0953	0.0953	0	0	0.0163	5	6	5	0	0	0	4	5	5	0	0	0	(K)LHLHLTDDEGWR(L); (K)VVMTQATHLYFDHPYEPDPEER(G)	Unidentified	Unidentified	unidentified	A7RSQ4_NEMVE	Beta-N-acetylhexosaminidase	A7RSQ4	Nematostella vectensis	Metabolic process	Membrane	Beta-N-acetylhexosaminidase activity
5	53	HSP70predicted protein [Nematostella vectensis]	XP_001622423.1	71 kDa	0.0015	0.37308	0.24639	0.37547	0	0	0	0.135	0.133	0.136	0	0	0	6	6	5	0	0	0	4	4	3	0	0	0	(K)APAIGIDLGTTYSCVGVFQHGK(V), (K)VEIIANDQGNR(T), (K)TFFAEEISSMVLNK(M), (K)DAGVISGLNVLR(I), (R)IINEPTAAAIAYGLDKK(V), (K)ELEGVCNPIITK(L), (K)SINPDEAVAYGAAVQAAILHGDK(S)	Unidentified	c27026_g1_i1	MAKAPAVGIDLGTTYSCVGVFQHGKVEIIANDQGNRTTPSYVAFTDTERLVGDPAKNQVAMNPINTVFDAKRLIGRRFEDPGVQDDMTHWPFQVISEGGRPKIRVEFKGETKTFFAEEISSMVLNKMKETAEAYLGTKVTDAVITVPAYFNDSQRQATKDAGVISGINVLRIINEPTAAAIAYGLDKKVGAERNVLIFDLGGGTFDVSILSIEEGIFEVKSTAGDTHLGGEDFDNKMVTHFVEEFKRKYKKNLTSNKRALRRLRTACERAKRTLSSSTQASIEIDSLFEGIDFYTSITRARFEELNSELFRKTKEPVEKSLRDAKLGKNEIHDIVLVGGSTRIPKIQSILREIFTDKELNKSINPDEAVAYGAAVQAAILSGDKHENVQDLLLLDVAPL…	HSP7D_MANSE	Heat shock 70 kDa protein cognate 4	Q9U639	Manduca sexta	Stress response	Nucleus	Nucleotide binding
6	69	Beta-hexosaminidase subunit beta-like [Orbicella faveolata]	XP_020612680.1	62 kDa	0.082	0.097566	0.13033	0.035007	0.021778	0.02396	0.022942	0.0631	0.0631	0.0353	0.0148	0.0148	0.0148	3	4	1	0	0	0	2	2	1	0	0	0	(K)FNVLHWHVVDDQSFPFVSK(T), (R)VIPEFDTPGHTFSWR(S).	Unidentified	c30952_g1_i1	MAELCNTLLVIFGLFCFALPSSTTKPSLSDPLNLQRYGGKQQILAEDYVKGSIWPKPQGQTPTGVKFSLLPKSFSFSIKGKTSDVLTDAVKRYMKLTFPDSGVTTKDDKLAEITSLEINVVNDYKPITLESDESYTLTINAPQSTLYAYEVWGALRGLETFSQVVYQDENDLYYAQENKIIDYPRFHYRGFMIDTSRHYLKPSIILKFLDAMSYGKFNVLHWHVVDDQSFPFVSKTFPSLSGQGAYNNKTHIFSDDDVKNVIEYARMRGIRVIPEFDTPGHTFSWRSIENLLTKCCDKQGKPTGGLGPIDPTIDSNYDFLKTFFGEVGSRYPDQYLHLGGDEVSFDCWKSNPNITAWMQKHGMGSNYSLLEQYYEQKLLNIVGGLKKQYIIWQEVVDNN…	HEXB_HUMAN	Beta-hexosaminidase subunit beta	P07686	Homo sapiens	Metabolic process	Extracellular region	Beta-N-acetylhexosaminidase activity
7	75	LOW QUALITY PROTEIN: beta-hexosaminidase subunit beta-like [Exaiptasia pallida]	XP_020897599.1	77 kDa	0.081	0.078005	0.049679	0.028269	0	0	0	0.0303	0.0303	0.0166	0	0	0	3	2	1	0	0	0	2	2	1	0	0	0	(K)FLDAMSYGK(F), (K)VLPDTVVNVWK(G).	Unidentified	c30952_g1_i1	MAELCNTLLVIFGLFCFALPSSTTKPSLSDPLNLQRYGGKQQILAEDYVKGSIWPKPQGQTPTGVKFSLLPKSFSFSIKGKTSDVLTDAVKRYMKLTFPDSGVTTKDDKLAEITSLEINVVNDYKPITLESDESYTLTINAPQSTLYAYEVWGALRGLETFSQVVYQDENDLYYAQENKIIDYPRFHYRGFMIDTSRHYLKPSIILKFLDAMSYGKFNVLHWHVVDDQSFPFVSKTFPSLSGQGAYNNKTHIFSDDDVKNVIEYARMRGIRVIPEFDTPGHTFSWRSIENLLTKCCDKQGKPTGGLGPIDPTIDSNYDFLKTFFGEVGSRYPDQYLHLGGDEVSFDCWKSNPNITAWMQKHGMGSNYSLLEQYYEQKLLNIVGGLKKQYIIWQEVVDNN…	HEXB_HUMAN	Beta-hexosaminidase subunit beta	P07686	Homo sapiens	Metabolic process	Extracellular region	Beta-N-acetylhexosaminidase activity
8	82	Heat shock cognate 71 kDa protein-like [Orbicella faveolata]	XP_020632080.1	71 kDa	0.0019	0.25531	0.17816	0.28954	0	0	0	0.122	0.121	0.122	0	0	0	3	4	4	0	0	0	3	3	3	0	0	0	(K)VEIIANDQGNR(T),(R)TTPSYVAFTDTER(L), (K)NQVAmNPSNTIFDAK(R), (R)IINEPTAAAIAYGLDKK(V), (K)SINPDEAVAYGAAVQAAILSGDK(S),	Unidentified	c27026_g1_i1	MAKAPAVGIDLGTTYSCVGVFQHGKVEIIANDQGNRTTPSYVAFTDTERLVGDPAKNQVAMNPINTVFDAKRLIGRRFEDPGVQDDMTHWPFQVISEGGRPKIRVEFKGETKTFFAEEISSMVLNKMKETAEAYLGTKVTDAVITVPAYFNDSQRQATKDAGVISGINVLRIINEPTAAAIAYGLDKKVGAERNVLIFDLGGGTFDVSILSIEEGIFEVKSTAGDTHLGGEDFDNKMVTHFVEEFKRKYKKNLTSNKRALRRLRTACERAKRTLSSSTQASIEIDSLFEGIDFYTSITRARFEELNSELFRKTKEPVEKSLRDAKLGKNEIHDIVLVGGSTRIPKIQSILREIFTDKELNKSINPDEAVAYGAAVQAAILSGDKHENVQDLLLLDVAPL…	HSP7D_MANSE	Heat shock 70 kDa protein cognate 4	Q9U639	Manduca sexta	Stress response	Nucleus	Nucleotide binding
9	83	HSP 70. predicted protein [Nematostella vectensis]	XP_001639786.1	70 kDa	0.00037	0.11815	0.11529	0.13399	0.039768	0.021374	0.020466	0.117	0.0762	0.0871	0.0358	0.0358	0.0358	4	4	4	0	0	0	4	3	3	0	0	0	(K)AVNPDEAVAIGAAIQGGVLAGDVK(D), (K)DVLLLDVTPLSLGIETLGGVFTK(L), (R)EQQIVIQSSGGLSK(D), (K)SQVFSTAADGQTQVEIK(V).	Unidentified	c31660_g2_i2	MALQRLREAAEKAKIELSSAVQTDINLPYITVDASGPKHMNLKLSRAKFESLVGDLINRTVGPCKKCLQDAEISKSDIGDVLLVGGMTRMPKVQSTVQDIFGRQPSKAVNPDEAVALGAAIQGGVLAGDVKDVLLLDVTPLSLGIETLGGVFTKLITRNTTIPTKKSQVFSTAADGQTQVEIKVHQGEREMAADNKLLGQFQLVGIPPAPRGVPQVEVTFDIDANGIVNVSARDKGTGREQQIVIQSSGGLSKDAIENMIKEAEKFAESDRQKKETTEAVNHAESMIHDTETKMEEFKDQLPSEETDKLKEEITKVREVLANKESESAETIRQAYSELQQKSLKLFEMAYKKMASERESTGSTDTSSESTDNDDKKKDES	GRP75_BOVIN	Stress-70 protein, mitochondrial	Q3ZCH0	Bos taurus	Protein refolding	Mitochondrion	Unfolded protein binding
10	84	NADP-dependent malic enzyme-like [Exaiptasia pallida]	XP_020892524.1	69 kDa	< 0.00010	0.15368	0.14995	0.17428	0	0	0	0.127	0.105	0.105	0	0	0	5	5	5	0	0	0	4	4	4	0	0	0	(R)ILGLGDLGCCGMGIPVGK(L); (R)FGPTTLIQFEDFGNHNAFR(F); (K)ICTFNDDIQGTAAVAVAGILASLK(I); (K)AIFASGSPFDPVTLPDGR(H); (K)YIQLMALLER(N)	Unidentified	c25775_g1_i1	MLPAAVQKGVPTISSRVGSLRSFFFKESHWVRLAATRRIFTATTAYFRMTEEKRVNKIPTIRGTDIMHDSRLNKGLAFTLQERQILGIQGLLPPYMSDQDTQAKRVYAEMHRKTNDLDKYIQLMALLERNESLFFRVLFDHTEEIMPIVYTPTVGLACQEYGMIFRRPRGLFISIYDKGHVNEIVANWPIQDVKAIVMTDGERILGLGDLGCCGMGIPVGKLALYTVCGGINPKCCLPVMIDVGTNNQSLLDDPFYIGVRQKRDNSEAYDELIDEFINAALQRFGPTTLIQFEDFGNHNAFRFLEKYRNKICTFNDDIQGTAAVAVAGIIASLKVTKTKLSDQQIVFQGAGEAAIGIANLLVLAMRKEGLSEEEAKKKIWLVDSKGLVVKDRAVGGLNA…	MAOX_ANAPL	ADP-dependent malic enzyme	P28227	Anas platyrhynchos	Oxidation-reduction process	Cytoplasm	Oxidoreductase activity
11	86	Putative aminopeptidase W07G4.4, partial [Exaiptasia pallida]	XP_020897390.1	24 kDa	0.002	0.17685	0.27748	0.20057	0	0	0	0.103	0.147	0.0938	0	0	0	2	3	2	0	0	0	2	3	2	0	0	0	(R)LIQLEYVGEGK(I); (K)IDQTLLLVGK(G); (K)GITYDTGGADIK(A)	Unidentified	c27931_g1_i1	MADILNLPAPVETTSNPKDGKWDGVVLVCEDLDWKCEPIDFLKDPIKAAQKVDKSAGSDVLLFPLSEGPPFVIHAPTGPVNRDYDDVRRYSDAAVKGIQRAIKAGSKSPLLVVPPKNSFADAWPVTVLGGFHGLYVPLEIREDVPSKKQKVDKLGVFLRGKKENVDYVSALESGRLVCRDIGGSDPERMAAPNVETYVRKIFEGTPVKISVLSEESAFERDYPLLAAVNRCAKHVERHRGRLIQLEYVGEGNIDQTLLLVGKGITYDTGGADIKAGGVMAGMHRDKCGAAAVAGFFQILAKLKPKGIKVLGKMAMVRNSVGADCYVADEIITSAAGVRVRVGNTDAEGRMVMADPLHHSKLEALKEKNPHIITIATLTGHAIRAMGPNYSIVLDNGPAA…	YH24_CAEEL	Putative aminopeptidase W07G4.4	Q27245	Caenorhabditis elegans	Proteolysis	Cytoplasm	Peptidase activity
12	87	Elongation factor 1-alpha. predicted protein [Nematostella vectensis]	XP_001625311.1	52 kDa	0.0061	0.21101	0.11588	0.13468	0	0	0	0.0869	0.0466	0.0466	0	0	0	5	3	3	0	0	0	4	2	2	0	0	0	(R)GITIDIALWK(F); (K)YYVTVIDAPGHR(D); (R)LPLQDVYK(I); (K)IGGIGTVPVGR(V); (K)STTTGHLIYK(C).	Unidentified	c18587_g1_i1	MPPKGKGGEEGGKKGEKPHINIVVIGHVDSGKSTTTGHLIYKCGGIDKRAIEKFEKEAAEMGKGSFKYAWVLDKLKAERERGITIDIALWKFETNKYYVTVIDAPGHRDFIKNMITGTSQADCAVLIVASGTGEFEAGISKNGQTREHALLAFTLGVKQMIVACNKMDNTEPPYSEARFKEIEKEVSSYLKKIGYNPKKIHFLPISGWHGDNMLEKSEKMPWWNGFELFNKSAGAKTGSTLFDALDDINMPDRPTDKALRLPLQDVYKIGGIGTVPVGRVETGILKPGMLVTFAPVNLTTEVKSVEMHHTALTEALPGDNVGFNVKNLSVKDIKRGFVAGDSKNDPPKNIGFFDAQVIVLNHPGEIHNGYSPVLDCHTAHIACKFHEIKNKGDKRSGKV…	EF1A_APIME	Elongation factor 1-alpha	P19039	Apis mellifera	Translation	Cytoplasm	Nucleotide binding
13	96	Retinal dehydrogenase 1-like [Exaiptasia pallida]	XP_020916234.1	53 kDa	< 0.00010	0.074705	0.072893	0.084721	0	0	0	0.0451	0.0451	0.0451	0	0	0	2	2	2	0	0	0	2	2	2	0	0	0	(K)IFINNEFVDAVSK(K), (R)ILELIESGK(T).	Unidentified	c27302_g1_i1	MNIPEVKYTKLFINNEFVDAVSKKTFPTINPTTEEKICDVAEADKADVDIAVKAAKEAFKLGSPWRTMDASQRGRLLYKLGTLIERDAEYLSRLESLDGGKVVSESAGDMNATINCFKYYAGWADKTNGKTIPADGQLFTYTRNEPVGVVGAITPWNFPLMLASLKIAPALACGCVVILKPAEQTPLTAVYLGSLIKEAGIPPGVVNILPGYGPTAGAAISEHMEVDKVTFTGSTEIGRIIQKAAAMSNLKRVSLELGGKSPNIVFADADLDQAVQGCFVGLFFNQGQCCCAGSRVFVEEGIYDDFVKKLVEMAVARKVGQPLLKETQQGPQIDSDQFKKILELIESGKTEGAKLECGGGRHSDKGYFIEPTVFSDVQDHMRIAKEEIFGPVMQVFKFK…	AL1A1_CHICK	Retinal dehydrogenase 1	P27463	Gallus gallus	Oxidation-reduction process	Cytoplasm	Oxidoreductase activity
14	100	NADP-specific glutamate dehydrogenase like. uncharacterized protein LOC110066880 [Orbicella faveolata]	XP_020629795.1	55 kDa	0.0076	0.15394	0.19356	0.27837	0	0	0	0.0465	0.0646	0.105	0	0	0	1	2	3	0	0	0	1	2	3	0	0	0	(R)VEFNSAIGPYK(G), (R)FHPTVNLGILK(F), (R)HIGPNTDVPAGDIGVGGR(E).	Unidentified	c27917_g1_i2	MMLRVLNRRGVSVLSRVGIVRCVSTTTPTLAQATDKSKDKEQYKFTSIDGFMDFVAKKNPGELEFHQAVHEVVTSIWDHLSENPYYNKHNVLERIVEPERVVIFRVPWRDDKGQINVNKGYRVEFNSAIGPYKGGLRFHPTVNLGILKFLGFEQVFKNSLTTLPLGGGKGGSDFDPKGKSDNEVMNFCQSFMSELQRHIGPNTDVPAGDIGVGGREIGYMFGQYKRIRNEFTGVLTGKSHGWGGSLLRPEATGYGLVYFTAEMLGTKGESLKGKTVTVSGSGNVAQFATEKVTQMGGKVVTLSDSSGTIYDPDGITKEKLAYVTDLKNVQRGRISEYALKYGVKFYEGKRPWFIKCDVALPCATQNEVDEEDAQTLVDNGCTCVAEGANMPTEPKAIEI…	DHE3_BACTN	Glutamate dehydrogenase	P94598	Bacteroides thetaiotaomicron	Metabolic process	Cytosol	Oxidoreductase activity
15	112	Arginine kinase. predicted protein [Nematostella vectensis]	XP_001641325.1	79 kDa	< 0.00010	0.075371	0.073544	0.085477	0	0	0	0.0537	0.0537	0.0537	0	0	0	3	3	3	0	0	0	3	3	3	0	0	0	(K)GSDIGSVFSR(L), (R)VVGVLTSLTGDLAGK(Y).	Unidentified	c31555_g3_i1	MEKGSDIGSVFSRLCRAVNEIDKKLGFQHTKKHGYLTSCPSNLGTGMRASVHVKIPHAKEHPDFDNILTKYHIQARGIHGEHSESTGEDAGVYDISNRRRLGLSEVQCVQDMYDGVKALMELEKEAIAKKRSVFPEVLKNPEVKSLLRKYLTPELFDSLKDKKTAKGISLYDCINSGVVNLDSSAGVYAGDEESYTLFAPLFDKIVEDYHSPYKLANKHTSDMNPEKVDAPNLDPEGTYIRSTRIRVARNLKGYALTPGLTRNERLDIERKVVGVLSSLTGDLAGKYHPLTGMDEATRQKLVDDHFLFKKGDR	KARG_ANTJA	Arginine kinase	O15992	Anthopleura japonica	Phosphorylation	Unknown	Kinase activity
16	102	Gamma aminobutyric acid receptor-associates protein like 2. predicted protein [Nematostella vectensis]	XP_001637976.1	14 kDa	0.28	0.14593	0.54229	0.37217	0	0	0	0.145	0.214	0.145	0	0	0	1	3	2	2	2	1	1	2	1	0	0	0	(K)FLVPSDLTVAQFMYIIR(K),(K)AMFLFVNK(V)	(K)FLVPSDLTVAQFMYIIR(K),(K)AMFLFVNK(V)	c30000_g2_i1	MKWAFKEEHSLESRCQESSKIRSKYPDRIPVVVEKAPKSSIQDIDKRKFLVPSDLTVAQFMYIIRKRIQLPPEKAMFLFVNKVLPTTSSTMGAIYEEHKDEDGFLYIAYSGENTFGN	GBRL2_RAT	Gamma-aminobutyric acid receptor-associated protein-like 2	P60522	Rattus norvegicus	Autophagy	Cytosol	Protein binding
17	115	Ras-related protein Rab-11A [Exaiptasia pallida]	XP_020898934.1	25 kDa	0.0019	0.16986	0.26583	0.19264	0	0	0	0.106	0.261	0.106	0	0	0	2	3	2	0	0	0	2	3	2	0	0	0	(K)VVLIGDSGVGK(S),(K)STIGVEFATR(S),(R)GAVGALLVYDIAK(H),(K)NGLSFIETSALDSTNVEVAFQNILTEIYHIVSQK(Q).	Unidentified	c31046_g4_i1	MGTKDDEYDYLFKVVLIGDSGVGKSNLLSRFTRNEFNLESKSTIGVEFATRSIQVDGKTIKAQIWDTAGQERYRAITSAYYRGAVGALLVYDIAKHLTYENVERWLKELRDHADSNIVIMLVGNKSDLRHLRAVPTDEAKAFAEKNGLSFIETSALDSTNVEVAFQNILTEIYHIVSQKQIHDSPTSDGSHPSNNVQTIHVAPTTDEDRKKKVQCCNA	RB11A_RAT	Ras-related protein Rab-11A	P62494	Rattus norvegicus	Protein transport	Endosome	Nucleotide binding
18	116	Glucose-6-phosphate isomerase-like [Exaiptasia pallida]	XP_020910035.1	62 kDa	0.01	0.097197	0.12983	0.071592	0	0	0	0.0485	0.0754	0.0485	0	0	0	3	4	2	0	0	0	2	3	2	0	0	0	(K)TFTTIETITNATTAK(T), (R)NMFAFWDWVGGR(Y), (R)FAAYFQQGDMESNGK(F)	Unidentified	c26781_g1_i1	MSSPDSKKQKKMSSLMISAEWAALQQHYHSKASVLHMRELFESDPNRFKKFSIQLDTPKDGKLLVDYSKNIVNDETMKLLFDLARSRGVESMRDKMFSGEKINFTENRAVLHVALRNRSNKPILVDGKDVMGDVNGVLQHMREFSEAVRSGTWKGHTGKSITDVVNIGIGGSDLGPLMVTEALQPFGQKGLNVHFVSNIDGTHIAKTLAKLNPETSLFIIASKTFTTIETITNATTAKTWLLKSLKEKSAVSKHFVALSTNEQKVTDFGIDKKNMFAFWDWVGGRYSLWSAIGLSIAIYIGMDNFEALLSGAHTMDNHFCSAPLEKNLPVILAVLGIWYNNFFGTQTHGLFPYDQYMHRFAAYFQQGDMESNGKYVTRFAEEVDYSTGPIVWGEPGTNG…	G6PI_PIG	Glucose-6-phosphate isomerase	P08059	Sus scrofa	Metabolic process	Cytoplasm	Isomerase activity
19	122	Tyrosine-protein phosphatase non-receptor type 11-like [Exaiptasia pallida]	XP_020898511.1	63 kDa	0.075	0.062323	0.0936	0.034448	0	0	0	0.061	0.061	0.0341	0	0	0	2	3	1	0	0	0	2	2	1	0	0	0	(K)IQNSGDYYDLYGGE(K), (K)FATLSELVQYYTENPGQLR(E).	Unidentified	c29926_g1_i1	MPSRRWFHSNISGLDAEKLLTERGLDGSYLVRPSKSNPGDFTLSVRRNGEVTHIKIQNSGDYYDLYGGEKFATLSELVQYYTENPGQLREKNGQLIEMKYPLNSADPTTERWFHGHMSSKEAETVLLDKGKNGSFLVRESQGRPGNYVLTVRCDDKITHVMIRNHGNGQYDVGGGEKFDDLTELVEHYKKNPMVEKSGTVVHLRNPFNATRINAACIEDRVKELQKENKNVTGKAGFYEEFEVLQKQECKHLYSRKEGERPENKSKKRYKNILPFDHSRVLLKGRDPNVVGSDYLNANYINGEAQGTEKQYIAAQGCLPATVEDFWAGVYQENSRIIVMTTKEVERGRNKCTRYWPDPETVKDVGKYHVKHVKETELPDYVLSQFELTTDDDFIPRTIY…	PTN11_HUMAN	Tyrosine-protein phosphatase non-receptor type 11	Q06124	Homo sapiens	Dephosphorylation	Cytoplasm	Protein binding
20	130	Predicted protein [Nematostella vectensis]	XP_001634494.1	268 kDa	0.013	0.021584	0.03553	0.01622	0	0	0	0.0139	0.0235	0.0139	0	0	0	3	5	2	0	0	0	2	4	2	0	0	0	(R)HRPDLIEFEK(L); (K)EEVGATVEAVQELIK(K); (R)EVDDLELWIADK(E); (K)DGINESWADLLELIETR(T)	Unidentified	c32124_g1_i2	MSVEIDVKHPLDRPSTDLLEVSRHRLEGLPTHMEDRDADVMRAFIDSMGTMGEVTADFSQVHGSEEEWMEQQSSARLFERSRIKVLADERERVQKKTFTKWINSHLQRVGARVNDLYHDLQDGRKLILLLEILSGEKLPKPSKGRMRIHNLENVEKCLVFLKKQRVHLENIGAHDIVDGNQKITLGLIWTIILRFQIQDIMIEGETKERRSAKDALLLWCQSKTVGYRNVTITNFTTSWRDGLAFNAIIHKHRPDLIEFEKINKVDAEQNLEQAFEVAETQLGITPLLDAEDVMVDFPDEKSIITYVSAYYHYFAKMKTVEVSGTRIGKVIERIKENEELINEYEKLATDLLEWIEMRIQTLADRDFANTLVGVQQQMLEFNQYRTQEKPPRFVEKGNL…	SPTB2_MOUSE	Spectrin beta chain, non-erythrocytic 1	Q62261	Mus musculus	Cellular component organization	Membrane	Protein binding
21	137	Protein lin-7 homolog C-like [Exaiptasia pallida]	XP_020913341.1	21 kDa	0.007	0.32126	0.19345	0.22484	0	0	0	0.118	0.169	0.169	0	0	0	3	2	2	1	0	0	0	2	2	0	0	0	(K)TDEGLGFNVMGGR(E), (K)RGDQLLSVNGVSVEGENHER(A), (R)EQNSPIYISR(I).	Unidentified	c23174_g1_i1	MASTEPLTLARDVNRAIELLQKLQSSGDIPSKKLQALKKVLESEFCQAIREVYEHVYETVDIQGSPELRAQATAKATIAAFAASEGHAHPRVVELPKTDEGLGFNVMGGREQNSPIYISRIIPGGVADRHGGLKRGDQLLSVNGVSVEGENHERAVDLLKAAQGKVRLVVKYTPKLLEEMEARFNSQRGSKKR	LIN7B_HUMAN	Protein lin-7 homolog B	Q9HAP6	Homo sapiens	Exocytosis	Membrane	Protein binding
22	141	Failed axon connections homolog [Exaiptasia pallida]	XP_020907479.1	45 kDa	0.005	0.088402	0.13415	0.10025	0	0	0	0.0376	0.0927	0.0627	0	0	0	2	3	2	0	0	0	1	2	2	0	0	0	(R)AVAHAFSTMAEENTYWSLAYYR(W), (K)YYSNLAPVVK(D), (K)HTKDEIYGIAEADLR(A).	Unidentified	c18643_g3_i1	MSTEVESVPQEQPEVAVEAAKPDENHVEENKPAEEAEAAEKIEDAVVDGESKKEENGSVPPKVILHQHPPCNNIPSFLPASLKLETFLRMHKIPYENKYVHKLGSDKVKLPFIEYEGDKVQDANFCIKYLNNKFELNPDGHLTEEQRAIGHAFSTMAEENTYWSLAYYRWVDNFSETKKYYSNLAPVVKDVRPKLDQSKCIKCMQAHGIGKHTKDEIYGIAEADLRAISAFLGEKEFFMDGEPSVIDCTMFGLLASIVDGAPESPQAKLIKEEMKNLEKFCDTMKLNYWLDWGDICNDENAEEFKPKSRLSFKNKKKRAKSTDGKEGESDKAEEKEEEKKEGEEAAAASEEAAPEKEEGAASGETATPEEGAKPEETKKEEAEAEPSKEPEKEKEEEEK…	FAXC_HUMAN	Failed axon connections homolog	Q5TGI0	Homo sapiens	Unknown	Membrane	Unknown
23	142	Translation elongation factor 2-like [Orbicella faveolata]	XP_020628913.1	94 kDa	0.0031	0.06329	0.061756	0.097383	0	0	0	0.0619	0.0619	0.0726	0	0	0	2	2	3	0	0	0	2	2	3	0	0	0	(K)GFLINLIDSPGHVDFSSEVTAALR(V), (R)ALLELQLEK(E), (R)GFNQFVLDPIYK(M), (K)AYLPVNESFGFTADLR(S).	Unidentified	c26671_g1_i1	MSVIAHVDHGKSTLTDSLVSKAGIIAGAKAGETRFTDTRKDEQERCITIKSTAISMYYELSEDDIQHVPGGNKEERGFLINLIDSPGHVDFSSEVTAALRVTDGALVVVDSISGVCVQTETVLRQAIAERIKPVLFLNKMDRALLELQLEKEDLYQTFTRIVESVNVIIATYSDEDGPMGDITVSPEKGTVGFGSGLHGWAFSLKQFAEIYATKFKIEPKKLMNRLWGNSFYSAKEKKWKKEFAEGYVRGFNQFVLDPIYKVFDSVMNFKKDETQKLIDKLNIKLSVPEKEMEGKPLMKAMMRRWLPAGDTMLQMITMHLPSPVVSQNYRMELLYEGPKDDPIALGIKNCDPKAELCLYVSKMVPTTDKGRFYAFGRVFSGTVATGQKVRIMGPKYVPG…	EF2_CAEEL	Elongation factor 2	P29691	Caenorhabditis elegans	Protein biosynthesis	Ribonucleoprotein complex	Elongation factor
24	143	Predicted protein [Nematostella vectensis]	XP_001638214.1	96 kDa	0.0075	0.040583	0.039599	0.070217	0	0	0	0.0389	0.0389	0.0389	0	0	0	2	2	3	0	0	0	2	2	2	0	0	0	(K)HGSIIYHPSLLPR(H), (K)AGFSIFWADDGLDTGPILLQK(S).	Unidentified	c31953_g1_i1	MAQLKIAIIGQSQFGLEVYKRLRSKGHEIVGVFTIPDVNGKPDILAIGAEEDGVQVFKFPRWRVKGKPIEDVVNQYTQCGAELNVMPFCSQFIPMNVIDFPKHGSIIYHPSILPRHRGASAINWTLMEGDKRGGFTIFWADDGLDTGPILLQKIVDIDRNDTVDTLYNRFLYPEGIKGMVEAVELIADGKAPKIPQTEDGATYDKIWKKKEVAKINWGLPAAALHNFIRGNDKLPGAWATIDGEQVTFYSSNLGPRKRVPQGTEIYIDGHDKAAIVHKDGMTLFGSDGKMLTVKTLQLADGRMVSASKYGLEEEETVALELTDDEKVIVDKIKTIWAGILANPDINDETDFFKAGAGSMDVARLVEEVKQKCAVVLESEEVYLNTGFEAFVRLSILRSR…	AL1L1_XENLA	Cytosolic 10-formyltetrahydrofolate dehydrogenase	Q6GNL7	Xenopus laevis	Oxidation-reduction process	Cytoplasm	Oxidoreductase activity
25	152	PREDICTED: rab GDP dissociation inhibitor alpha-like [Acropora digitifera]	XP_015780141.1	37 kDa	0.0089	0.10789	0.10528	0.19174	0	0	0	0.0388	0.0388	0.0567	0	0	0	2	2	3	0	0	0	1	1	2	0	0	0	(K)VPADEKEALATSLmGIFEK(R), (K)EALATSLmGIFEK(R).	Unidentified	c24410_g1_i1	MDEEYDVIVLGTGLKECILSGLLSVNGKKVLHMDREKYYGGETASLSPLEELFKKFGKTGEVQDKYGKGRDWNVDLVPKFLMAGGELVQMLILSGVTRYLEFKSIKGSYVYKGSKIYKVPADEKEALATSLMGIFEKRRFRKFLIFTNDYDSDDSKTWGGIDPKKSTMQDVYDKFGLDVNTADFTGHSLALYTNDDYKSQPCGPTLSKIKLYSESLARYGTSPYLYPLYGLGELPQGFARLSAIYGGTYMLDKPIEGIVYDDNGQVTGVTSQGETARTKIVVSDTSYFPDKTKKVGQVVRCICILDHTVANTKDAESLQIIIPQNQVGRKSDIYVAVLSSANNVAAKGFYLAFVTTTVETNNPEAELKPGLDLLGPVLEKFVDVVDLKEPIDDGSKSKV…	GDIA_BOVIN	Rab GDP dissociation inhibitor alpha	P21856	Bos taurus	Protein transport	Cytoplasm	Nucleotide binding
26	154	Cathepsin L1-like [Exaiptasia pallida]	XP_020904698.1	36 kDa	0.016	0.11176	0.052151	0.060613	0	0	0	0.157	0.0615	0.0615	0	0	0	2	1	1	0	0	0	2	1	1	0	0	0	(K)QCGSCWAFSATGSLEGQHFK(K), (K)LVSLSEQNLVDCSTSFGNHGCQGGLMDNAFR(Y).	Unidentified	c29945_g1_i1	MLSVLFLVVLVAVAQSSPFGEEDLQWKAWKSFHAKKYTTESEEGQRRAIWRNNLEIIKAHNTGKHSYTMAMNQFGDLTATEFKYLFLGYRAGNSTRGSTFMPPSNVVLPATVDWRTKGYVTPVKNQKQCGSCWAFSATGSLEGQHFKKTGKLVSLSEQNLVDCSTSYGNHGCQGGLMDNAFRYIKANGGIDTEASYPYEARNERCRFKSSDVGATDTGFTDVQSGSEEALQQAVASVGPISVAIDAGHSSFQMYHSGVYDEPNCSSTQLDHGVLAVGYGTYQGKDYWLVKNSWASSWGMEGYIMMSRNKNNQCGIATQASYPLV	CATL2_HUMAN	Cathepsin L2	O60911	Homo sapiens	Proteolysis	Lysosome	Peptidase activity
27	155	LOW QUALITY PROTEIN: matrilysin-like [Orbicella faveolata]	XP_020631312.1	30 kDa	0.0017	0.13838	0.21405	0.15693	0	0	0	0.0906	0.0906	0.0453	0	0	0	2	3	2	0	0	0	2	2	1	0	0	0	(K)YWADVSGLSFSR(A), (K)VLAHAFFPSDGR(A).	Unidentified	c55106_g1_i1	ESGSRIRRYKLGSKWGKKHLTYFVEYGRDLSSGEQDRIFARALKYWADVSGLSFSRASSASSADLKISFGARTHGGSSERTCAYPFDGPGKVLAHAFFPSNGRAHFDEDERYTDGTSSGTNLLWVATHEFGHSLGLHHSDVRNAVMYPYYTGYVPNFRLQQDDVNGIQAHYGK	HE_HEMPU	50 kDa hatching enzyme	P91953	Hemicentrotus pulcherrimus	Proteolysis	Extracellular matrix	Peptidase activity
28	157	Transcriptional enhancer factor TEF-1-like [Exaiptasia pallida]	XP_020893953.1	50 kDa	0.0068	0.080314	0.12149	0.1412	0	0	0	0.0519	0.0745	0.0948	0	0	0	2	3	3	0	0	0	1	2	2	0	0	0	(K)HLFVHLGPNTNFTDPLLEAVDIR(Q), (K)GPQSVFFLVK(F), (K)YMMNSVLENFTILQVVTNR(E).	Unidentified	c2264_g1_i1	MTNSADEGKAKSPVDMANDAEGVWSPDIEQSFQEALAIYPPCGRRKIILSDEGKMYGRNELIARYIKLRTGKTRTRKQVSSHLQVLARKKVSSHIQVLARKTAKDIQGKFKDQAARDKALQTMASMSSAQIVSASVIHNKNMSGASGFSGNENQSYQYWQQPGSNQQAAGYGSVNQSPYGSPIQPGIQGGNVVSTATASSSAGAVVNSQDEIVRSTTFGDTRTVVTSPPSGAASWASNRQASHMPLRLLEFSAFLEQQTMDPETYHKHLFVHLGPNTNFTDPLLEAVDIRQIYDKFPEKKGGLKELYDKGPQSVFFLVKFWADLNTSIHDEAGAFYGVSSTYESSENMTITCSTKVCSFGKQVVEKVETEYGHFENGSFLYRIHRSPMCEYMINFIHKL…	TEAD1_HUMAN	Transcriptional enhancer factor TEF-1	P28347	Homo sapiens	Transcription	Nucleus	Protein binding
29	158	Glyceraldehyde-3-phosphate dehydrogenase-like [Exaiptasia pallida]	XP_020895288.1	36 kDa	0.0049	0.1125	0.10977	0.060994	0	0	0	0.0751	0.0751	0.042	0	0	0	2	2	1	0	0	0	2	2	1	0	0	0	(R)VPVPDVSVVDLTVR(L), (K)AGLALNDNFVK(L).	Unidentified	c21744_g1_i1	YLSNRRRLLLCKTSAPSRKDKILPRHLIKMTIKFGINGFGRIGRLVCRASLERDDVQLVAVNDPFLDAEYMAYLFKYDSTHGRFKGDVKVVDGKLVINGKTVEVYANKDPTTIPWGKHGADTVVESTGVFTTIEKAGAHLKGGAKKVIISAPSADAPMFVMGVNEEKYEPSMNVVSNASCTTNCLAPIAKVVNDNFGIVEGLMTTIHAYTATQKTVDGPSGKKWRDGRGAHQNVIPASTGAAKAVGKVIPELNGKLTGMAFRVPVPDVSVVDLTVRLKNGASYDQIKSAVKKASESKEMGRFLGYTEDDVVSSDFIGNTTSSIFDAKAGLSLNDNFVKLVAWYDNEYGYSHRVIDLLVYMAKRA	G3P_RHIMI	Glyceraldehyde-3-phosphate dehydrogenase	Q8NK47	Rhizomucor miehei	Metabolic process	Cytoplasm	Oxidoreductase activity
30	164	Predicted protein [Nematostella vectensis]	XP_001639268.1 (+2)	25 kDa	< 0.00010	0.16577	0.16175	0.18799	0	0	0	0.0982	0.0982	0.0982	0	0	0	2	2	2	0	0	0	2	2	2	0	0	0	(K)LSILYPATTGR(N), (R)VIDSLQLTATK(K).	Unidentified	c26896_g1_i1	MVNLGDIFPDFKAESSDGTIQFHQFIEGTWAILFSHPADYTPVCTTELGRVSQLAGEFKKRGVKMIALSCDDVDSHKGWIKDVNAYSGEGFPYPILADPKRELAVQLGMVDPDEKDAKGLPLTCRAVFIIGPDKRLKLSILYPATTGRNFNEILRVIDSLQLTATKKVATPVDWKSGEDCMVLPSISQEDAAKLFPKGVKIKEVPSGKQYLRYTPQPE	PRDX6_CHICK	Peroxiredoxin-6	Q5ZJF4	Gallus gallus	Oxidation-reduction process	Lysosome	Oxidoreductase activity
31	166	Predicted protein, partial [Nematostella vectensis]	XP_001629218.1	47 kDa	0.024	0.13252	0.083249	0.046736	0	0	0	0.0951	0.0557	0.0186	0	0	0	2	2	1	0	0	0	2	2	1	0	0	0	(K)DLWLVEFFAPWCGHCQR(L),(R)TGIDEFLR(T),(R)GDSLPELSSIEAWDGK(D)	Unidentified	c27374_g1_i1	MDVHQSVGGPYGIRGFPTIKIFGANKNSPKDYNGPRTAQGVADAAMSAAKEAVSQRLSGGGRSSGGGRQGGGSGGSGKNAVVELTDANFEKEVLNSKDLWLVEFFAPWCGHCQRLAPEWAKAASELEGKVKVGAVDATVHTVTASRYQVQGYPSIKVFAAGVKDSHSVEDYQGGRTASDIVQFALEKMAASIEPPEIEQAVESKVLAGNCNEKPLCVISFLPHILDSGAEGRNKYLSVLKELGEKYKKNLWGWLWSEAGAQQKLEESLEIGGFGYPALVAVNARKKKYATLRGSFDRTGIDEFLRTVAVGRGATSALKGDSLPELSTVEAWDGKDGQLPQEEDIDLSDVDLDDEGDKKKEEL	PDIA6_RAT	Protein disulfide-isomerase A6	Q63081	Rattus norvegicus	Protein folding	Endoplasmic reticulum	Isomerase activity
32	167	Predicted protein [Nematostella vectensis]	XP_001642026.1	62 kDa	0.16	0.064074	0.03045	0	0	0	0	0.0504	0.0198	0	0	0	0	2	1	0	0	0	0	2	1	0	0	0	0	(R)AALLEWPHAVGIALDTK(G), (R)GDLGIEIPAEK(V).	Unidentified	c31736_g1_i1	MSAKGARAEYVHYVEQRHKHWMGSRASSYLEYLCELDIDREPVTIRNSGLICTIGPASRSVETIVQLIENGLNIARLNFSHGTHEYHKETIANIRRAALIEWPHAVGIALDTKGPEIRTGLLKGGGSAEISLKKGQKLKLSTNKDMFDKGDENTIFVDYANISKVVPIGGIVYVDDGLISLKVTDKGADFMMTEVQNDGNLGSKKGVNLPNCEVDLPAVSEQDKKDIAFAMEEDLDMIFASFIRKPSDIEEIRQLLGDKAKAIKIVAKIENHEGVRRFNEIVDAADGIMVARGDLGIEIPAEKVFLAQKMMISRCNRVGKPVICATQMLESMVVNPRPTRAEASDVANAILDGADCVMLSGETAKGRYPVNAVRMMHSICREAEAAIFSKQLFDELRHS…	KPYM_HUMAN	Pyruvate kinase PKM	P14618	Homo sapiens	Metabolic process	Cytoplasm	Kinase activity
33	169	Drebrin-like protein isoform X1 [Exaiptasia pallida]	XP_020895566.1 (+1)	66 kDa	0.46	0.059922	0.028524	0	0.020624	0	0.021726	0.0382	0.0226	0	0.026	0	0.026	2	1	0	0	0	0	2	1	0	0	0	0	(K)TWQDIFDDK(S), (K)SSTNWAVFGYEGK(T).	Unidentified	c30729_g1_i1	MAVDLKKNRSELLKTWQDIFDDKSSTNWAVFGYEGKTNTLKVQETGEDGIEELADELNDGKILYAGIKVTDPNTNLPKIVFINWQGEGVPSTRKGGCANHVRDIENLFRGAHVIINARNEDDVEESVILEKVKKASGAAYSAHKEKPQKAEPILPVGSVYKRTNVTKEIDVNKRDKFWGSEEKKEQERIEEEKKKKIQERQESERKRKEREAKEAEKREVEYRERSKSIEEQRKHARELEEQKKEEEKRRWESQRAEDESQDREQKARADSLRKERMKEAESLIAKGKTEKPAFEERKAPPPAPKKKPPAALPQKRAAVPPPQPKPKREPEPEVEPEPEPTPEPEPAITRATIMPVPKRPPDSDEEPEEEDWGDEPAQQEIPHTQAEPDDSTYEEVPEP…	DBNL_DROME	Drebrin-like protein	Q9VU84	Drosophila melanogaster	Cell migration	Cytoskeleton	Actin binding
34	173	Major vault protein-like [Exaiptasia pallida]	XP_020915905.1	95 kDa	< 0.00010	0.04112	0.040123	0.046633	0	0	0	0.0377	0.0377	0.0377	0	0	0	2	2	2	0	0	0	2	2	2	0	0	0	(R)IPPYYYIHVLDQNTNVTK(V), (R)LAQDPFPLFPGEVLK(H), (R)VAGDEWLFEGPGTLIPR(K).	Unidentified	c29565_g1_i1	MSSRATEGESIYRIPPYYYIHVLDQNTNVTKVEVGPKTFIRQDNEKVIVGPEKMITIPPRHYCIIENPVMRDPKEGKVIVDEYGQIRLRHADQEIRLAQDPFPLFPGEVLKLGCTPLRIVMANSALRLRAVLDFEDESGEKRVAGDEWLFEGPGTLIPRKEVEVIETVRATVIQANQAIKLRARKETRDREGHLRVTGEIWLVRRVGAYLPGAYEEVVAVVDAFVLTDKLALHLVATGTFKDVYGITRKNGEEWLITKDEAEAHIPDVYEEVKGLVDITTLNNRQYCVIQNPIGKDGKPQLGQKKLVKGEKSFFLMPGECLERGTQDVYILGEDEGLILKCNEAFTDTDEDEEEITRRPGDRWMIRGPSEYIPPVEVEVIDRRKAIPLDNNEGIYVRDI…	MVP_STRPU	Major vault protein	Q5EAJ7	Strongylocentrotus purpuratus	Protein transport	Nucleus	Ribonucleoprotein
35	177	Isochorismatase domain-containing protein 2-like [Exaiptasia pallida]	XP_020900581.1	22 kDa	0.31	0.19163	0.086895	0	0	0.069124	0	0.127	0.0558	0	0	0.0761	0	2	1	0	0	0	0	2	1	0	0	0	0	(K)IPILATEQYPK(G), (R)NYEVHILADGVSSR(T).	Unidentified	c25037_g1_i1	MAARLGRLATESTAFLLCDMQEKFRPSIRYFPEIIKVAQRMVTAGNIMKIPIIATEQYPKGLGSTVSDIDTSEFKEKIFPKTVFSMVIPEVEEELKKMPNVKSVVLFGIETQVCILQTTLDLLERNYEVHILADGVSSRTMVERMFALDRLRQSGAFITTSESVLFMLLGNSKHPNFKEVQALVKTAAPDSGLLSKV	ISOC2_XENLA	Isochorismatase domain-containing protein 2	Q5PQ71	Xenopus laevis	Unknown	Unknown	Unknown
36	178	PREDICTED: uncharacterized protein LOC107355583 isoform X1 [Acropora digitifera]	XP_015777656.1 (+1)	68 kDa	0.02	0.057698	0.086494	0.03195	0	0	0	0.0408	0.0425	0.0255	0	0	0	2	3	1	0	0	0	2	3	1	0	0	0	(R)KEEYmSAVGLAmLFDR(S), (K)EEYmSAVGLAmLFDR(S), (R)AmWDEWDLR(E).	Unidentified	c20714_g1_i1	MAFRQRIRKMNKKIREVGEDRKALMHNELFVLDNSLRESTVGQLRGHTIENKWKIYNEIKKIGYQNIIVASFSHMTRLGDTFCQQLAYEGEDFSKLWAFSEFLESIDKSRVPNTEAVPIGLKKCRDLGLYNVIIEFDLVYKGIDYTKFTAEKICQLCSDRMKWIRENLSPDARILFNLRDFSDAMKKEPERQFHVINYLSSLPKSERPFGLIYEESGKYLPEEVGAWTAAVREEMDDCGFKEGHLLVHVHEQWGASVTTQLECIANGADGVWASLCEEGASMGHCSSTMTLMNMIRIGNKRVLEQYNCTKLREAAINVQKITTGKPPHAKQPVYGERALDMVFGMPNFAPDKKTFNMAEFFGEEPVMRMTTLASKSMVVTRLKRLFGEDPQFTEERAQR…	CIMA_AQUAE	(R)-citramalate synthase	O66682	Aquifex aeolicus	Metabolic process	Unknown	Transferase activity
37	182	Pyruvate kinase PKM-like [Exaiptasia pallida]	XP_020901568.1	61 kDa	0.012	0.03161	0.063351	0.035849	0	0	0	0.0236	0.0399	0.0236	0	0	0	1	2	1	0	0	0	1	2	1	0	0	0	(R)NSGIICTIGPASR(S), (R)LDFALNMGK(T).	Unidentified	c31736_g1_i1	MSAKGARAEYVHYVEQRHKHWMGSRASSYLEYLCELDIDREPVTIRNSGLICTIGPASRSVETIVQLIENGLNIARLNFSHGTHEYHKETIANIRRAALIEWPHAVGIALDTKGPEIRTGLLKGGGSAEISLKKGQKLKLSTNKDMFDKGDENTIFVDYANISKVVPIGGIVYVDDGLISLKVTDKGADFMMTEVQNDGNLGSKKGVNLPNCEVDLPAVSEQDKKDIAFAMEEDLDMIFASFIRKPSDIEEIRQLLGDKAKAIKIVAKIENHEGVRRFNEIVDAADGIMVARGDLGIEIPAEKVFLAQKMMISRCNRVGKPVICATQMLESMVVNPRPTRAEASDVANAILDGADCVMLSGETAKGRYPVNAVRMMHSICREAEAAIFSKQLFDELRHS…	KPYM_HUMAN	Pyruvate kinase PKM	P14618	Homo sapiens	Metabolic process	Cytoplasm	Kinase activity
38	194	Extended synaptotagmin-3-like isoform X1 [Exaiptasia pallida]	XP_020906060.1 (+2)	87 kDa	0.16	0.045017	0.021557	0	0	0	0	0.0401	0.0207	0	0	0	0	2	1	0	0	0	0	2	1	0	0	0	0	(R)GVIDDVVASFVVLPNR(I), (K)TIQDSISPVWEEPFR(F).	Unidentified	c19120_g1_i1	MSKKPPEISEGKNPAPTSASIQNQSPGKTEEAAKPMALGSDEMMIVKVLLGFLKYAGAALLIWIFGWFGFGFTWIIIGSLIFTFWMKNQEKKTKKKNIARDVAKHEETAVEARIDELPAWVFFPDVERAEWLNKMIVQLWPYINDMVIKILKEKVEPEIQKNVPGFLSSIYFDELSLGDQPPRIGGIKTYTQNVKRSEIIMDVDLIYAGNSDIRLSVKGISVGIEDLQLRGTLRVILSPLIPTSPLVGGISVFFLNRPDIDFDLTNLLNILDIPGLSDILRGVIDDVVASFVVLPNRITVPLTDIDPYKLKFPLPDGVLRIHVIEAKDLVKKDIGVFKKGSSDPYAVIKVGAQTFKTETKDETLNPKWDEVFEVFVDNSQGQKIKIHLFDQDKTSDDES…	ESYT3_XENTR	Extended synaptotagmin-3	Q5M7N9	Xenopus tropicalis	Lipid transport	Membrane	Lipid binding
39	195	Catenin beta-like [Exaiptasia pallida]	XP_020895849.1	82 kDa	0.042	0.023328	0.046431	0.082568	0	0	0	0.0377	0.0606	0.0539	0	0	0	1	2	3	0	0	0	1	2	3	0	0	0	(K)LLGSQVEAVVFYAITTLHNLLLHQEGAK(M), (R)MDDIVEGTVGALHILSR(E), (K)LIILASGGPAELVR(I), (R)FGGIEALVR(T).	Unidentified	c31556_g1_i1	METGHMGLPRGEMNKNAQTTMWHQQYHDSGIMSGATTTAHSVKGDEDDDYMKTTHMSFEWEQSFTDQEMQAMNEQFVSTRSQRIRQAMFPETLEEGMQIPSTQFDATSATAVQRLAEPSLMLKQAVVNLINYQDDADLATRAIPELTKLLNDEDQVVVGQAAMMVHQLSKKDASRHAIMNSPQMVAALVRALNNATDVETTRCAAGTLHNLSHHRQGLLSIFKSGGIPALVKLLGSQVEAVVFYAITTLHNLLLHQEGAKMAVRLAGGLQKMVALLGRTNVKFLAIVTDCLHVLAYGNQESKLIILASGGPAELVRIMKSYTYEKLLFTTSRVLKVLSVDTDNKMAIVEAGGMQALAMHLGHQSNRLVQNCLWTLRNLSDAATKEEGLDNLLQMLVQLL…	CTNB_URECA	Catenin beta	P35224	Urechis caupo	Cell adhesion	Cytoskeleton	Protein binding
40	199	Eukaryotic translation initiation factor 3 subunit B-like [Exaiptasia pallida]	XP_020904265.1	84 kDa	0.16	0.022678	0.045113	0	0	0	0	0.0206	0.0385	0	0	0	0	1	2	0	0	0	0	1	2	0	0	0	0	(K)TSILWNSPQEPIMVK(E), (K)VDNGYFIWSFQGK(L).	Unidentified	c30024_g1_i1	MADEKSHEDEKSDVEGEETPQNDEKMVNGDENDSEFDDPEGFVDDITEEELLGDIISQRPKEIEGTESIVVVDNVPVIGQERSEKLKNVIRKVFSKFGKIVTEYYPLLDGQTKGYIFLEFSNANDAARAVKTANGYKLDKHHVFAVNHFEDFMKLLDPKEDWKPPAKQSYNQQENLRSWLQDPDCNDQYSVIHGEKTSILWNSPQEPLMVKERPNWTETYVLWSPKGTYLSTFHGQGVALWGGEEFKRIMRFSHPGVQLIDFSPCERYLVSFSPIPSSSEDPSGIIIWDIRTGQKRRGFLSGDTSQWPAFKWSHDGKYFARMGTDSISVYETPSFGLIDKKSLKVEGVKDFQWSPSNNYIAYWTPEDKDTPARVTIMEIPDRKEIRVKNLFNVSDCKLY…	EIF3B_HUMAN	Eukaryotic translation initiation factor 3 subunit B	P55884	Homo sapiens	Protein biosynthesis	Cytosol	Nucleotide binding
41	200	Calcineurin subunit B type 1 [Exaiptasia pallida]	XP_020907153.1	19 kDa	0.019	0.22404	0.10048	0.11678	0	0	0	0.335	0.171	0.171	0	0	0	2	1	1	0	0	0	2	1	1	0	0	0	(R)KLDLDNSGALSVEEFMSLPELQQNPLVQR(V), (R)VIDIFDSDGNGEVDFKEFIEGVSQFSVK(G).	Unidentified	c29154_g1_i1	MGNEASLPSDMVTHFDADEIRRLGKRFRKLDLDNSGALSVEEFMSLPELQQNPLVQRVIDIFDSDGNGEVDFKEFIEGVSQFSVKGDKESKLRFAFRIYDMDNDGLISNGELFQVLKMMVGNNLKETQLQQIVDKTILNADKDGDGKICFSEFCAIVGNMDVHKKMVVDV	CANB1_RAT	Calcineurin subunit B type 1	P63100	Rattus norvegicus	Actin filament polymerization	Cytoplasm	Protein binding
42	201	Propionyl-CoA carboxylase beta chain, mitochondrial-like isoform X1 [Exaiptasia pallida]	XP_020909523.1 (+1)	63 kDa	0.012	0.030647	0.061371	0.034756	0	0	0	0.0298	0.0491	0.0193	0	0	0	1	2	1	0	0	0	1	2	1	0	0	0	(R)IQEGVESLAGYADIFQR(N), (R)EFVDFLPLSNK(D).	Unidentified	Unidentified	Unidentified	PCCB_PIG	Propionyl-CoA carboxylase beta chain, mitochondrial	P79384	Sus scrofa	Metabolic process	Mitochondrion	Ligase activity
		Proteins exclusively identified in Lebrunia neglecta				Quantitative Value (emPAI)						Percent Coverage						Exclusive Unique Spectrum Count						Exclusive Unique Peptide Count
		Refseq_Cnidaria				Anthopleura	Anthopleura	Anthopleura	Lebrunia	Lebrunia	Lebrunia	Anthopleura	Anthopleura	Anthopleura	Lebrunia	Lebrunia	Lebrunia	Anthopleura	Anthopleura	Anthopleura	Lebrunia	Lebrunia	Lebrunia	Anthopleura	Anthopleura	Anthopleura	Lebrunia	Lebrunia	Lebrunia	Tryptic peptide sequence		Anthopleura transcriptome		Uniprot
	Santos_20170717_Refseq_Cnidaria_20170801_AD1-3_LD1-3_SCAFF4	Identified Proteins (202)	Accession Number	Molecular Weight	T-Test (p-value): (p < 0.05)	AD1	AD2	AD3	LD1	LD2	LD3	AD1	AD2	AD3	LD1	LD2	LD3	AD1	AD2	AD3	LD1	LD2	LD3	AD1	AD2	AD3	LD1	LD2	LD3	Anthopleura	Lebrunia	Code	Sequence	Code	Name protein	Accession Number	Species	GO-Biological process	GO-Cellular component	GO-Molecular function
1	11	Vitellogenin 1. uncharacterized protein LOC110237419 [Exaiptasia pallida]	XP_020898659.1	168 kDa	< 0.00010	0	0	0	0.10711	0.11784	0.11283	0	0	0	0.057	0.057	0.057	0	0	0	12	12	12	0	0	0	7	7	7	unidentified	(R)GIANMLQIAPK(A),(K)AEEYHTFTPYSELGGK(V),(R)IVSELTVHLR(M),(R)QCYISYGALVNR(L),(R)MAIVELMLDR(Q),(K)MNVPQSYIPR(N),(R)GLCGDNNGEDYQELR(G).	unidentified	unidentified	VIT_ACITR	Vitellogenin	Q90243	Acipenser transmontanus	Lipid transport	Unknown	Nutrient reservoir activity
2	23	Calmodulin-like [Exaiptasia pallida]	XP_020915374.1	35 kDa	0.00059	0	0	0	0.43567	0.32551	0.45895	0	0	0	0.211	0.185	0.218	0	0	0	8	6	8	0	0	0	5	4	4	unidentified	(K)GMMKVDEFK(S),(R)LTNNDIEQMISVLDPAK(K),(R)LTNNDIEQMISVLDPAKK(G),(K)MFDKDGDGTIDTDELEEVMK(S),(K)SIGEKPSR(K),(K)ELEDMINDVDKDGLGYIK(F).	unidentified	unidentified	CALL3_RAT	Calmodulin-like protein 3	Q5U206	Rattus norvegicus	Signal transduction	Unknown	Metal ion binding
3	26	Disulfide isomerase 2. uncharacterized protein LOC110243164 [Exaiptasia pallida]	XP_020904893.1	148 kDa	0.00064	0	0	0	0.057715	0.07491	0.082895	0	0	0	0.0387	0.0455	0.0683	0	0	0	6	7	8	0	0	0	5	6	7	unidentified	(K)NDPPVLLAK(V),(K)HGVSGYPTLK(I),(K)VHGLAGHMTQDNQDQFNKPLCVVYYNVDYK(L),(K)VMNYAIAK(S),(K)FLQXYFDGK(L),(K)LKDVEDIVIAK(M),(K)VEGFPTIYWAPK(N),(R)EVSDFITFLK(S).	unidentified	unidentified	PDIA3_HUMAN	rotein disulfide-isomerase A3	P30101	Homo sapiens	Oxidation-reduction process	Endoplasmic reticulum	Isomerase
4	41	Prolyl endopeptidase-like isoform X2 [Exaiptasia pallida]	XP_020895488.1	135 kDa	< 0.00010	0	0	0	0.063368	0.069716	0.066753	0	0	0	0.0609	0.0617	0.06	0	0	0	6	6	6	0	0	0	6	6	6	unidentified	(K)VFLDPNKLSDDGTTALAGR(T), (K)LSDDGTTALAGR(T), (K)ADGTETDSNLDQK(L), (K)QNLLVLGYLHDVK(S), (K)SVLHLHSLETGXR(L), (K)LIEEYSDIFAFIAR(N).	unidentified	unidentified	PPCE_HUMAN	Prolyl endopeptidase	P48147	Homo sapiens	Proteolysis	Cytoplasm	Peptidase activity
5	43	Probable protein disulfide-isomerase A6 [Exaiptasia pallida]	XP_020895514.1	48 kDa	0.00073	0.040241	0	0	0.20238	0.26917	0.25773	0.0386	0	0	0.145	0.145	0.198	0	0	0	6	7	7	0	0	0	4	4	6	unidentified	(K)VGAVDMDVHQSVGGPYNIR(G),(K)LGAVDATVHTVLGSR(Y),(R)YQVQGYPTIK(V),(R)SVEDYQGGR(T),(R)WGWLWSEAGAQPK(L),(K)LEEAFEVGGFGYPALVAVNSR(K).	unidentified	unidentified	PDIA6_RAT	Protein disulfide-isomerase A6	Q63081	Rattus norvegicus	Protein folding	Endoplasmic reticulum	Isomerase activity
6	45	Catalase-like [Exaiptasia pallida]	XP_020893863.1	57 kDa	0.0078	0.033467	0	0.037954	0.16349	0.14558	0.2436	0.0314	0	0.0314	0.153	0.126	0.185	1	0	1	6	5	8	1	0	1	5	4	6	(K)GGGAFGYFEVTHDITK(Y)	(K)GGGAFGYFEVTHDITK(Y),(R)FSTVGGESGSADTVR(D),(R)DPILFPSFIHTQK(R),(R)ATQLAGSDPDYSNR(D),(K)SPYNPFDLTK(I),(K)NYFAEIEQSAFNPASMVPGIEASPDK(M).	unidentified	unidentified	CATA_HUMAN	Catalase	P04040	Homo sapiens	Metabolic process	Cytoplasm	Catalase activity
7	62	Small heat shock protein p36-like [Exaiptasia pallida]	XP_020903556.1	22 kDa	0.00011	0	0	0	0.5409	0.45847	0.43898	0	0	0	0.296	0.245	0.245	0	0	0	6	5	5	0	0	0	5	4	4	Unidentified	(K)ILISTVDVK(N),(K)NYKPEEISLR(V),(K)HGTESFEFHR(V),(R)VFQLPADVDPSSVSSR(I),(R)ITYDGLLHIEAFK(T).	Unidentified	Unidentified	L2EFL_DROME	Protein lethal(2)essential for life	P82147	Drosophila melanogaster	Stress response	Z disc	Developmental protein
8	65	Calpain-B-like isoform X1 [Exaiptasia pallida]	XP_020896918.1	76 kDa	0.015	0	0	0	0.09696	0.083505	0.038296	0	0	0	0.0752	0.0556	0.0421	0	0	0	5	4	2	0	0	0	4	3	2	Unidentified	(K)NEFWSSLLEK(A),(R)GRPTELVR(V),(K)ITNEQNSSLDAK(F),(R)QIFDDVCGDDDEIDAYELQR(L).	Unidentified	Unidentified	CANB_DROME	Calpain-B	Q9VT65	Drosophila melanogaster	Proteolysis	Cytoplasm	Peptidase activity
9	70	Golgin subfamily B member 1-like [Exaiptasia pallida]	XP_020902350.1	350 kDa	0.00066	0	0	0	0.015564	0.021503	0.016395	0	0	0	0.0143	0.0156	0.0156	0	0	0	4	5	4	0	0	0	4	4	4	Unidentified	(R)VAELENLVHR(L), (R)LEYDNSELENK(Y), (K)ERDDAEVQIAGLYEK(L), (K)SELVQVQNQLK(D).	Unidentified	Unidentified	ANT1_ONCVO	Major antigen	P21249	Onchocerca volvulus	Unknown	Unknown	Unknown
10	73	Actin, cytoplasmic [Orbicella faveolata]	XP_020600429.1	42 kDa	0.0036	0	0	0	1.3352	1.7843	1.7085	0	0	0	0.516	0.545	0.566	0	0	0	5	5	4	0	0	0	3	3	3	Unidentified	(R)TTGIVFDSGDGVSHTVPIYEGYALPHAILR(L), (R)KDLYANTVLSGGSTmFPGIADR(M), (K)DLYANTVLSGGSTmFPGIADR(M).	Unidentified	Unidentified	ACTC_PISOC	Actin, cytoplasmic	P12716	Pisaster ochraceus	Cell motility	Cytoplasm	ATP binding
11	76	Protein disulfide-isomerase like 2-1-like [Exaiptasia pallida]	XP_020912038.1	41 kDa	0.056	0	0	0	0.069351	0.076298	0.073056	0	0	0	0.0603	0.0603	0.0603	0	0	0	2	2	2	0	0	0	2	2	2	Unidentified	(R)YGVSGFPTIK(F),(K)TNKDGEEYSGGR(S).	Unidentified	Unidentified	PDI22_ORYSJ	Protein disulfide isomerase-like 2-2	Q942L2	Oryza sativa subsp. japonica	Unknown	Extracellular region	Isomerase activity
12	77	Titin-like [Exaiptasia pallida]	XP_020893048.1	1891 kDa	0.00011	0	0	0	0.00213	0.0023434	0.0022438	0	0	0	0.00214	0.00214	0.00214	0	0	0	3	3	3	0	0	0	3	3	3	Unidentified	(R)NDSGSSSSTANLVVK(E), (K)VPPEITLVLR(N), (K)mSSDGEQcTLK(I)	Unidentified	Unidentified	TITIN_HUMAN	Titin	Q8WZ42	Homo sapiens	Muscle contraction	Cytosol	Metal ion binding
13	85	Calmodulin-like isoform X1 [Exaiptasia pallida]	XP_020916587.1	21 kDa	0.033	0	0	0	0.46265	0.25893	0.15262	0	0	0	0.183	0.128	0.128	0	0	0	5	3	2	0	0	0	4	3	2	Unidentified	(R)NGTICTHELR(N),(K)DGFISFDDLK(R),(K)DGFISFDDLKR(T),(R)VCYTEFVQFFQR(E).	Unidentified	Unidentified	CALM_RENRE	Calmodulin	P62184	Renilla reniformis	Signal transduction	Unknown	Metal ion binding
14	88	LOW QUALITY PROTEIN: arylsulfatase J-like [Exaiptasia pallida]	XP_020906513.1	56 kDa	< 0.00010	0	0	0	0.13467	0.14816	0.14187	0	0	0	0.138	0.138	0.138	0	0	0	5	5	5	0	0	0	4	4	4	Unidentified	(K)YPIHTGMQHSVILASQPYGLGLDETLLPQYLK(K),(R)GFDSFYGYWCGK(K),(R)GAGFVHSPLIK(K),(K)LLHVTDWLPTLYVR(A).	Unidentified	Unidentified	ARSJ_MOUSE	Arylsulfatase J	Q8BM89	Mus musculus	Unknown	Extracellular region	Metal ion binding
15	91	Protocadherin-like protein [Exaiptasia pallida]	XP_020900069.1	478 kDa	0.077	0	0	0	0.0056296	0.009322	0.0059304	0	0	0	0.00458	0.00756	0.00458	0	0	0	2	3	2	0	0	0	2	3	2	Unidentified	(R)LTYSLSGGDGK(F),(R)ASVGVPLAVVR(A),(K)LSAIGIDECAK(E)	Unidentified	Unidentified	PCDL_ACRMI	Protocadherin-like protein	B8V7Q1	Acropora millepora	Cell adhesion	Membrane	Metal ion binding
16	92	Protein DJ-1-like [Exaiptasia pallida]	XP_020895378.1	20 kDa	0.017	0.099392	0	0	0.24804	0.5406	0.37945	0.0479	0	0	0.213	0.287	0.287	0	0	0	3	5	4	0	0	0	2	3	3	Unidentified	(K)GSALIILADGAEEMETVITADVLR(R),(R)GPGTSFEFGIELVR(A),(R)GPGTSFEFGIELVR(A),(R)GDDGEADKLAGPMLLK(-).	Unidentified	Unidentified	PARK7_RAT	Parkinson disease protein 7 homolog	O88767	Rattus norvegicus	Protein stabilization	Cytoplasm	Protein binding
17	94	Adapter molecule crk-like [Exaiptasia pallida]	XP_020893922.1	30 kDa	0.00035	0	0	0	0.21927	0.171	0.23098	0	0	0	0.184	0.149	0.149	0	0	0	4	3	4	0	0	0	3	3	3	Unidentified	(K)TPGTFLVR(E),(R)ESSTIPGDYVLSVSESSK(V),(K)GTFYQIGEQTFTTLPEIIEFYK(R)	Unidentified	Unidentified	CRK_CHICK	Adapter molecule crk	Q04929	Gallus gallus	Signal transduction	Membrane	Ephrin receptor binding
18	95	ADP-ribosylation factor 1 isoform X2 [Exaiptasia pallida]	XP_020917327.1	20 kDa	0.045	0	0	0	0.61419	0.3798	0.15446	0	0	0	0.481	0.282	0.105	0	0	0	6	4	2	0	0	0	6	4	2	Unidentified	(K)LFSGLFGK(K),(R)ILMVGLDAAGK(T),(K)LGEIVTTIPTIGFNVETVEYK(N),(K)NISFTVWDVGGQDK(I),(R)MLNEDELRDAVLLVFANK(Q),(K)QDLPNAMNAQEVTDK(L).	Unidentified	Unidentified	ARF1_DROME	ADP-ribosylation factor 1	P61209	Drosophila melanogaster	Protein transport	Golgi apparatus	Nucleotide binding
19	97	Uncharacterized protein LOC110250314 [Exaiptasia pallida]	XP_020912576.1	52 kDa	0.00031	0	0	0	0.1137	0.090918	0.087054	0	0	0	0.0602	0.0387	0.0387	0	0	0	4	3	3	0	0	0	4	3	3	Unidentified	(K)SIISTFPK(K),(K)KITDIGTFFK(Y),(K)ITDIGTFFK(Y),(R)MELPGSQMSK(T).	Unidentified	Unidentified	SYR_MYCBO	Arginine--tRNA ligase	P67570	Mycobacterium bovis	tRNA aminoacylation for protein translation	Cytoplasm	Aminoacyl-tRNA ligase activity
20	98	Inorganic pyrophosphatase-like [Exaiptasia pallida]	XP_020895431.1	38 kDa	0.0011	0	0	0	0.11586	0.12747	0.16991	0	0	0	0.0742	0.0742	0.0742	0	0	0	3	3	4	0	0	0	2	2	2	Unidentified	(K)TLVNMVVEVPR(W),(K)HMPGLLDATVDWFK(I).	Unidentified	Unidentified	IPYR_DROME	Inorganic pyrophosphatase	O77460	Drosophila melanogaster	Phosphate-containing compound metabolic process	Cytoplasm	Inorganic diphosphatase activity
21	99	Cathepsin Z-like [Exaiptasia pallida]	XP_020898172.1	33 kDa	< 0.00010	0	0	0	0.13625	0.1499	0.14353	0	0	0	0.0878	0.0878	0.0878	0	0	0	3	3	3	0	0	0	2	2	2	Unidentified	(K)YAHETGIPDETCNNYQAK(D),(K)GVEYWIVR(N).	Unidentified	Unidentified	CATZ_BOVIN	Cathepsin Z	P05689	Bos taurus	Proteolysis	Lysosome	Cysteine-type peptidase activity
22	104	Muscle-specific protein 20-like [Exaiptasia pallida]	XP_020895643.1	21 kDa	< 0.00010	0	0	0	0.3292	0.36218	0.34679	0	0	0	0.19	0.19	0.144	0	0	0	4	4	3	0	0	0	4	4	3	Unidentified	(R)VWIEAVLGDK(V),(R)LAIALGAK(I),(K)VNEQNMPFK(Q),(K)QMENISNFLK(H).	Unidentified	Unidentified	MYPH_ECHGR	Myophilin	Q24799	Echinococcus granulosus	Unknown	Unknown	Unknown
23	105	Mesencephalic astrocyte-derived neurotrophic factor homolog [Exaiptasia pallida]	XP_020898099.1	20 kDa	0.013	0	0	0	0.3602	0.70938	0.37945	0	0	0	0.25	0.25	0.203	0	0	0	4	6	4	0	0	0	3	5	3	Unidentified	(K)DKECEVCIK(F),(K)VKDSLTSEEEGDYK(K),(K)DSLTSEEEGDYK(K),(K)SKDAQICELQYEQK(I),(K)ILNDFDETCQGCVEK(S).	Unidentified	Unidentified	ARMET_DROSI	Mesencephalic astrocyte-derived neurotrophic factor homolog	B4QX46	Drosophila simulans	Unknown	Extracellular region	Developmental protein
24	106	Myosin regulatory light polypeptide 9-like [Exaiptasia pallida]	XP_020892193.1	19 kDa	0.071	0	0	0	0.66685	0.28044	0.16437	0	0	0	0.339	0.281	0.246	0	0	0	6	3	2	0	0	0	5	3	2	Unidentified	(K)EAFNMIDQNR(D),(R)DGFISKDDLAATFDSLGK(L),(K)DDLAATFDSLGK(L),(K)LVKDDYLEEMLNEASGPINFTMFLTLFGEK(I),(K)DDYLEEMLNEASGPINFTMFLTLFGEK(I).	Unidentified	Unidentified	SQH_DROME	Myosin regulatory light chain sqh	P40423	Drosophila melanogaster	Myosin II filament assembly	Cytoplasm	Metal ion binding
25	107	Fibronectin type III domain-containing protein-like [Exaiptasia pallida]	XP_020907185.1	141 kDa	0.13	0	0	0	0.029271	0.043436	0	0	0	0	0.023	0.0293	0	0	0	0	3	4	0	0	0	0	3	4	0	Unidentified	(K)AIVTDGAMYK(C),(K)CVAYTDTK(Q),(K)QGTSVDSPITK(A).	Unidentified	Unidentified	FP_ACRMI	Fibronectin type III domain-containing protein	B8VIW9	Acropora millepora	Unknown	Membrane	Unknown
26	108	Selenium-binding protein 1-like [Exaiptasia pallida]	XP_020898889.1	54 kDa	0.00092	0	0	0	0.11034	0.1565	0.11623	0	0	0	0.15	0.15	0.15	0	0	0	4	5	4	0	0	0	4	4	4	Unidentified	(K)SPTYSQVIHR(L),(K)VQTIDLGVGTIPLEIR(F),(R)FLHDPNQAQGYVGCALSSTIVR(F),(K)KVEGWALPEMPGLITDILISLDDK(Y).	Unidentified	Unidentified	SBP1_XENTR	Methanethiol oxidase	Q569D5	Xenopus tropicalis	Oxidation-reduction process	Cytoplasm	Oxidoreductase activity
27	109	Collagen alpha. uncharacterized protein LOC110252824 isoform X1 [Exaiptasia pallida]	XP_020915325.1	206 kDa	0.0005	0	0	0	0.026746	0.029425	0.020965	0	0	0	0.0389	0.0234	0.0186	0	0	0	4	4	3	0	0	0	4	4	3	Unidentified	(K)LVQDDCTCSSDCGSGYK(C),(K)VLVLLTDGR(Q),(R)AAAIIYSDDPILSIDFDLFNTQEGFLDGVDKLPYIMQR(T),(K)NSFAQTICR(K).	Unidentified	Unidentified	CO6A6_HUMAN	Collagen alpha-6(VI) chain	A6NMZ7	Homo sapiens	Cell adhesion	Extracellular region	Extracellular matrix structural constituent
28	110	Citrate synthase, mitochondrial-like [Exaiptasia pallida]	XP_020899677.1	53 kDa	0.057	0	0	0	0.14566	0.090301	0.11894	0	0	0	0.123	0.0699	0.0953	0	0	0	5	3	4	0	0	0	5	3	4	Unidentified	(K)EQVVNLSHEWAAK(A),(K)FVQAYNSGVPK(A),(R)YVFDDSMELIAK(L),(K)LPTLAAYIYR(N),(R)ALGVLASLVWDR(A)	Unidentified	Unidentified	CISY_DANRE	Citrate synthase, mitochondrial	Q7ZVY5	Danio rerio	Metabolic process	Mitochondrion	Transferase activity
29	111	Plastin-1-like [Exaiptasia pallida]	XP_020908682.1	72 kDa	0.0013	0	0	0	0.059072	0.042356	0.040556	0	0	0	0.0547	0.0391	0.0391	0	0	0	3	2	2	0	0	0	3	2	2	Unidentified	(K)YSSAHAGSQFLDFLSK(K),(K)MSPEELLLR(W).	Unidentified	Unidentified	PLSI_MOUSE	Plastin-1	Q3V0K9	Mus musculus	Cellular component organization	Cytoplasm	Actin binding
30	113	Elongation factor Tu-like. uncharacterized protein LOC110250626 isoform X2 [Exaiptasia pallida]	XP_020912889.1	49 kDa	< 0.00010	0	0	0	0.05693	0.062633	0.059971	0	0	0	0.0554	0.0554	0.0554	0	0	0	2	2	2	0	0	0	2	2	2	Unidentified	(K)TTLTAAITK(I),(K)LLDXGEAGDNLGALIR(G).	Unidentified	Unidentified	EFTU_PICGU	Elongation factor Tu, mitochondrial	A5DN78	Meyerozyma guilliermondii	Translation	Mitochondrion	Elongation factor
31	117	Flagellin. hypothetical protein NEMVEDRAFT_v1g225978, partial [Nematostella vectensis]	XP_001617566.1	30 kDa	< 0.00010	0	0	0	0.15218	0.16743	0.16031	0	0	0	0.087	0.087	0.087	0	0	0	3	3	3	0	0	0	2	2	2	Unidentified	(R)NLSTSGSSLATTIQR(L),(K)DDAAGLAISER(F).	Unidentified	Unidentified	FLA_TATMI	Flagellin	P53606	Tatlockia micdadei	Cell motility	Extracellular region	Structural molecule activity
32	118	Collagen alpha 5. uncharacterized protein LOC110240827 [Exaiptasia pallida]	XP_020902303.1	1238 kDa	0.0078	0	0	0	0.0043475	0.004783	0.0022839	0	0	0	0.00402	0.00402	0.00294	0	0	0	4	4	2	0	0	0	3	3	2	Unidentified	(K)ALGPSGIAPPGAYVPK(C), (K)KPQcDSQSGLTEcQLER(Q), (R)ALGVLGVAPPGR(F).	Unidentified	Unidentified	CO6A4_MOUSE	Collagen alpha-4(VI) chain	A2AX52	Mus musculus	Cell adhesion	Extracellular region	Collagen binding
33	120	Endoplasmin-like [Exaiptasia pallida]	XP_020907283.1	101 kDa	0.12	0	0	0	0.056146	0.014714	0.028633	0	0	0	0.0745	0.0161	0.0275	0	0	0	4	1	2	0	0	0	4	1	2	Unidentified	(K)YSQFINFPIYLWTSK(V),(R)GIVDSDDLPLNVSR(E),(K)LGVIEDHSNR(T),(K)KGYEVLYLIEPVDEYCMQSLPEFEGK(K)	Unidentified	Unidentified	ENPL_RAT	Endoplasmin	Q66HD0	Rattus norvegicus	Protein folding	Endoplasmic reticulum	Unfolded protein binding
34	123	Glyoxylate reductase/hydroxypyruvate reductase-like [Exaiptasia pallida]	XP_020910639.1	35 kDa	< 0.00010	0	0	0	0.12901	0.14194	0.1359	0	0	0	0.0621	0.0621	0.0621	0	0	0	3	3	3	0	0	0	3	3	3	Unidentified	(K)DAIFCLLTEK(I),(K)VVATMSVGYDHVDTK(E),(R)RIVEAAAEAK(N),(R)IVEAAAEAK(N).	Unidentified	Unidentified	GRHPR_HUMAN	Glyoxylate reductase/hydroxypyruvate reductase	Q9UBQ7	Homo sapiens	Oxidation-reduction process	Extracellular exosome	Oxidoreductase activity
35	124	Expansin like 1 isoform X2. uncharacterized protein LOC110251213 [Exaiptasia pallida]	XP_020913561.1	38 kDa	0.13	0	0	0	0.035594	0.081689	0.12244	0	0	0	0.0329	0.0685	0.121	0	0	0	1	2	3	0	0	0	1	2	3	Unidentified	(K)ISFVAVDCPTVPGQAGNIQFR(F),(R)FQGSNPWYIK(L),(K)IPTAGLEAVIGGR(F).	Unidentified	Unidentified	YOAJ_BACSU	Expansin-YoaJ	O34918	Bacillus subtilis	Unknown	Extracellular region	Unknown
36	125	Myophilin-like isoform X1 [Exaiptasia pallida]	XP_020915418.1 (+1)	19 kDa	0.0025	0	0	0	0.2549	0.17167	0.16437	0	0	0	0.144	0.144	0.144	0	0	0	3	2	2	0	0	0	2	2	2	Unidentified	(K)MQENISNFLK(A),(K)QNVGQVISCLQALSR(V).	Unidentified	Unidentified	MYPH_ECHGR	Myophilin	Q24799	Echinococcus granulosus	Unknown	Unknown	Unknown
37	126	Heat shock protein HSP 90-alpha-like [Exaiptasia pallida]	XP_020896728.1	84 kDa	0.0048	0	0	0	0.068482	0.036229	0.053057	0	0	0	0.0468	0.0468	0.0468	0	0	0	4	2	3	0	0	0	2	2	2	Unidentified	(R)YHSSTSGDEMTSLK(D),(R)GFEVLYMVEPIDEYAVQQLK(E)	Unidentified	Unidentified	H90A1_DANRE	Heat shock protein HSP 90-alpha 1	Q90474	Danio rerio	Stress response	Cytosol	Chaperone
38	127	Myosin light chain kinase. uncharacterized protein LOC110245270 [Exaiptasia pallida]	XP_020907189.1 (+1)	41 kDa	0.0021	0	0	0	0.10892	0.16641	0.11474	0	0	0	0.072	0.072	0.072	0	0	0	3	4	3	0	0	0	2	2	2	Unidentified	(K)SVQGVKPDEHPDLK(Y), (K)HIAGEYFIAIQR(R).	Unidentified	Unidentified	HTP1_SAPPC	RxLR effector protein Htp1	D3JZP7	Saprolegnia parasitica	Unknown	Extracellular region	Unknown
39	128	Ribonuclease UK114-like [Exaiptasia pallida]	XP_020893771.1	15 kDa	0.032	0	0	0	0.34192	0.37618	0.21538	0	0	0	0.225	0.225	0.225	0	0	0	3	3	2	0	0	0	2	2	2	Unidentified	(K)TMYISGQLGLDPK(T),(K)QALTNMGHILEAGGSAFNK(V).	Unidentified	Unidentified	RIDA_CAPHI	2-iminobutanoate/2-iminopropanoate deaminase	P80601	Capra hircus	Metabolic process	Cytoplasm	Nucleotide binding
40	129	Histone H2B-like [Exaiptasia pallida]	XP_020896800.1 (+4)	25 kDa	0.48	0	0	0	0.11925	0.1312	0.058839	0	0	0	0.117	0.117	0.0495	0	0	0	2	2	1	0	0	0	2	2	1	Unidentified	(K)QVHPDTGISSK(A),(K)AMSIMNSFVQDVFER(I)	Unidentified	Unidentified	H2B_RHASC	Histone H2B	Q75VN4	Zhangixalus schlegelii	Transcription	Nucleosome	Nucleotide binding
41	131	40S ribosomal protein S4-like, partial [Exaiptasia pallida]	XP_020902294.1	33 kDa	0.011	0	0	0	0.19025	0.20931	0.090759	0	0	0	0.148	0.148	0.0756	0	0	0	4	4	2	0	0	0	4	4	2	Unidentified	(K)GVPYLVTHDAR(T),(K)FDTGNMAMIVGGR(N),(K)DATGHQFATR(L),(R)LTNVFIIGK(G).	Unidentified	Unidentified	RS4_IXOSC	40S ribosomal protein S4	Q4PMB3	Ixodes scapularis	Translation	Ribosome	Nucleotide binding
42	132	Predicted protein [Nematostella vectensis]	XP_001636825.1	97 kDa	0.18	0.04006	0.039089	0.045431	0.04311	0.047429	0.045414	0.0255	0.0255	0.0255	0.0394	0.0394	0.0394	1	1	1	2	2	2	1	1	1	2	2	2	(K)YCAVTQFEPTDAR(R),(R)YEGGFLLSR(L)	(R)ETALLIDPENSSSATK(Q),(R)AGLNQYLNK(F),(R)YEGGFLLSR(L)	Unidentified	Unidentified	PSA_MOUSE	Puromycin-sensitive aminopeptidase	Q11011	Mus musculus	Proteolysis	Cytoplasm	Peptidase activity
43	134	Lysosomal aspartic protease-like [Exaiptasia pallida]	XP_020899502.1	43 kDa	< 0.00010	0	0	0	0.066488	0.073149	0.07004	0	0	0	0.0716	0.0716	0.0716	0	0	0	2	2	2	0	0	0	2	2	2	Unidentified	(K)VVFDTGSSNLWVPSK(K),(K)LVPSAVFSFYLNR(D)	Unidentified	Unidentified	ASPP_AEDAE	Lysosomal aspartic protease	Q03168	Aedes aegypti	Proteolysis	Lysosome	Peptidase activity
44	135	Disintegrin and metalloproteinase domain-containing protein 10-like [Exaiptasia pallida]	XP_020910720.1	79 kDa	0.0027	0	0	0	0.034882	0.058762	0.056265	0	0	0	0.0281	0.0407	0.0435	0	0	0	2	3	3	0	0	0	2	3	3	Unidentified	(R)ISEVTFAHELGHGFGSQHDPEGTCSPGGK(N),(K)GDCSLSICTK(Y),(K)NPGKDECLAAK(K),(K)GYCDVFAVCR(M)	Unidentified	Unidentified	ADA10_PIG	Disintegrin and metalloproteinase domain-containing protein 10	O77633	Sus scrofa	Proteolysis	Membrane	Peptidase activity
45	138	Lamin-L(I)-like [Exaiptasia pallida]	XP_020904780.1	65 kDa	< 0.00010	0	0	0	0.042649	0.046922	0.044928	0	0	0	0.0523	0.0523	0.0523	0	0	0	2	2	2	0	0	0	2	2	2	Unidentified	(K)QIQTWGSGNEVR(T),(R)TALVNAGGEELATLSEEK(V)	Unidentified	Unidentified	LAML1_XENLA	Lamin-L(I)	P09010	Xenopus laevis	Unknown	Nucleus	Unknown
46	139	Phosphomethylethanolamine N-methyltransferase-like [Exaiptasia pallida]	XP_020900254.1	31 kDa	< 0.00010	0	0	0	0.094206	0.10364	0.099239	0	0	0	0.0674	0.0674	0.0674	0	0	0	2	2	2	0	0	0	2	2	2	Unidentified	(R)DTILHIADKETLFTNFLK(W),(K)ETLFTNFLK(W)	Unidentified	Unidentified	PEAM3_ARATH	Phosphoethanolamine N-methyltransferase 3	Q9C6B9	Arabidopsis thaliana	Metabolic process	Cytoplasm	Transferase activity
47	144	Short-chain collagen C4-like [Exaiptasia pallida]	XP_020912364.1	34 kDa	0.012	0	0	0	0.039955	0.092161	0.088244	0	0	0	0.0475	0.0854	0.0854	0	0	0	1	2	2	0	0	0	1	2	2	Unidentified	(R)TSCPSGANLVYK(G),(K)MMIPATYECPAGWSK(E)	Unidentified	Unidentified	CAS4_EPHMU	Short-chain collagen C4	P18503	Ephydatia muelleri	Unknown	Extracellular region	Unknown
48	147	Dihydropteridine reductase-like [Exaiptasia pallida]	XP_020908985.1	26 kDa	0.02	0	0.073834	0	0.18171	0.12505	0.11973	0	0.0615	0	0.16	0.111	0.111	0	1	0	3	2	2	0	1	0	3	2	2	(K)QSVWTSLIASSIAAK(H).	(K)GALGATCVTYFK(A),(K)SWTEQDQEVQKR(M),(K)QSVWTSLIASSIAAK(H).	Unidentified	Unidentified	DHPR_BOVIN	Dihydropteridine reductase	Q3T0Z7	Bos taurus	Oxidation-reduction process	Cytoplasm	Oxidoreductase activity
49	148	Lipoxygenase homology domain-containing protein 1-like isoform X1 [Exaiptasia pallida]	XP_020908668.1	290 kDa	0.095	0	0	0	0.0046316	0.010248	0.0098127	0	0	0	0.00503	0.0089	0.0116	0	0	0	1	2	2	0	0	0	1	2	2	Unidentified	(K)IVLRPTGGPTDTFQEGK(V),(K)FAVETVDIGDLTK(V)	Unidentified	Unidentified	LOXH1_HUMAN	Lipoxygenase homology domain-containing protein 1	Q8IVV2	Homo sapiens	Oxidation-reduction process	Cell projection	Catalase activity
50	150	Alpha-L-fucosidase-like [Exaiptasia pallida]	XP_020907650.1	54 kDa	0.0088	0	0	0	0.052024	0.057236	0.026591	0	0	0	0.0501	0.0327	0.0327	0	0	0	2	2	1	0	0	0	2	1	1	Unidentified	(K)DTVVVNDR(W),(K)FEDATTLDKPSWGFR(R).	Unidentified	Unidentified	FUCO_BRAFL	Alpha-L-fucosidase	C3YWU0	Branchiostoma floridae	Metabolic process	Extracellular region	Glycosidase
51	151	Uncharacterized protein LOC110245611 [Exaiptasia pallida]	XP_020907554.1	55 kDa	< 0.00010	0	0	0	0.050395	0.055444	0.053088	0	0	0	0.0405	0.0405	0.0405	0	0	0	2	2	2	0	0	0	2	2	2	Unidentified	(K)NQPTYGDNPTAR(N), (R)VELIVDGR(A).	Unidentified	Unidentified	ECDE_ASPRU	Putative glycosyl hydrolase ecdE	K0E4E1	Aspergillus rugulosus	Metabolic process	Unknown	Glycosidase
52	153	Lysosomal alpha-mannosidase-like [Exaiptasia pallida]	XP_020913027.1	102 kDa	0.027	0	0	0	0.026818	0.014521	0.043055	0	0	0	0.0321	0.0188	0.0653	0	0	0	2	1	3	0	0	0	2	1	3	Unidentified	(R)IAWHIDPFGHSNEQASLFAQMSFDGFFFGR(I),(R)QVFSPFISQVVR(L),(K)MLLEPILSFTENPSTVK(X)	Unidentified	Unidentified	MA2B1_MACFA	Lysosomal alpha-mannosidase	Q60HE9	Macaca fascicularis	Metabolic process	Lysosome	Alpha-mannosidase activity
53	156	Zinc metalloproteinase nas-13-like [Exaiptasia pallida]	XP_020913648.1	68 kDa	0.043	0	0	0	0.063083	0.022049	0.090785	0	0	0	0.0848	0.0294	0.0848	0	0	0	3	1	4	0	0	0	3	1	3	Unidentified	(K)NSGECGNNAGWMSSNCPK(S),(R)VCGEPDSDCKDDMPVACEEWAK(R),(R)YECSNNPIWMNK(N)	Unidentified	Unidentified	NAS15_CAEEL	Zinc metalloproteinase nas-15	P55115	Caenorhabditis elegans	Proteolysis	Extracellular region	Peptidase activity
54	159	Prolyl tripeptidyl peptidase 5 isofrom X1. uncharacterized protein LOC110247304 [Exaiptasia pallida]	XP_020909392.1	12 kDa	0.029	0	0	0	0.11574	0.12734	0.27796	0	0	0	0.139	0.139	0.194	0	0	0	1	1	2	0	0	0	1	1	2	Unidentified	(R)IDPLDKGFVYWSEGLPEEGGR(I),(K)GFVYWSEGLPEEGGR(I).	Unidentified	Unidentified	SYC_BURTA	Cysteine--tRNA ligase	Q2SX78	Burkholderia thailandensis	Translation	Cytoplasm	Ligase activity
55	160	Cubilin-like [Exaiptasia pallida]	XP_020916045.1	185 kDa	0.0058	0	0	0	0.014651	0.0079891	0.015433	0	0	0	0.0126	0.0054	0.0126	0	0	0	2	1	2	0	0	0	2	1	2	Unidentified	(K)YVYIESTGR(S),(R)FCGFYPFGFGVK(V)	Unidentified	Unidentified	CUBN_RAT	Cubilin	O70244	Rattus norvegicus	Lipid metabolism	Membrane	Protein binding
56	161	Chaperonin GroEL. hypothetical protein NEMVEDRAFT_v1g149214, partial [Nematostella vectensis]	XP_001620090.1	35 kDa	0.0036	0	0	0	0.082063	0.090285	0.1359	0	0	0	0.0336	0.0336	0.0336	0	0	0	2	2	3	0	0	0	1	2	2	Unidentified	(K)DRVDDALHAT(A),(R)VDDALHAT(A)	Unidentified	Unidentified	CH60_GRAFK	60 kDa chaperonin	A0M7D9	Gramella forsetii	Protein folding	Cytoplasm	Chaperone
57	163	Heat shock protein beta-6-like [Exaiptasia pallida]	XP_020903552.1	22 kDa	0.013	0	0	0	0.062182	0.14711	0.14085	0	0	0	0.08	0.13	0.08	0	0	0	1	2	2	0	0	0	1	2	1	Unidentified	(K)HHSEGEFGSETSEFHR(T),(K)DVDMDSVVSK(L)	Unidentified	Unidentified	HSPB2_RAT	Heat shock protein beta-2	O35878	Rattus norvegicus	Stress response	Cytoplasm	Unknown
58	165	CUB and peptidase domain-containing protein 2-like [Exaiptasia pallida]	XP_020897972.1	34 kDa	0.083	0	0	0	0.040491	0.044548	0.1409	0	0	0	0.0314	0.0314	0.101	0	0	0	1	1	3	0	0	0	1	1	3	Unidentified	(R)IVGGTEAPK(G),(K)GAWPWQAQLR(S),(K)RPYGMAHDISLLK(L)	Unidentified	Unidentified	CPP1_ACRMI	CUB and peptidase domain-containing protein 1	B8V7S0	Acropora millepora	Proteolysis	Cytoplasm	Peptidase activity
59	168	Myosin-10-like [Exaiptasia pallida]	XP_020901392.1	228 kDa	0.14	0	0	0	0.011874	0	0.018896	0	0	0	0.0198	0	0.0183	0	0	0	2	0	3	0	0	0	2	0	3	Unidentified	(R)ELEQELESLKSELEESIDTTAAATEMR(T),(K)TLETQLTEANIR(L).	Unidentified	Unidentified	MYH10_MOUSE	Myosin-10	Q61879	Mus musculus	Cell adhesion	Cytoskeleton	Actin binding
60	170	Ornithine aminotransferase, mitochondrial-like [Exaiptasia pallida]	XP_020909112.1	47 kDa	0.94	0	0.039828	0.04629	0.059599	0.031682	0	0	0.0255	0.0255	0.0626	0.0371	0	0	1	1	2	1	0	0	1	1	2	1	0	(K)IVFAEGNFWGR(T)	(R)AFYNNVLGEYEEFVTK(L),(K)IVFAEGNFWGR(T)	Unidentified	Unidentified	OAT_HUMAN	Ornithine aminotransferase, mitochondrial	P04181	Homo sapiens	Metabolic process	Mitochondrion	Transferase activity
61	171	Calponin-3-like [Exaiptasia pallida]	XP_020907072.1	16 kDa	< 0.00010	0	0	0	0.19625	0.21591	0.20673	0	0	0	0.167	0.167	0.167	0	0	0	2	2	2	0	0	0	2	2	2	Unidentified	(K)HGDKDEFAASLK(N),(K)QNVWGVVLALR(A)	Unidentified	Unidentified	MYPH_ECHGR	Myophilin	Q24799	Echinococcus granulosus	Unknown	Unknown	Unknown
62	172	Neural cell adhesion molecule 1-like [Exaiptasia pallida]	XP_020911328.1	89 kDa	< 0.00010	0	0	0	0.031025	0.034133	0.032683	0	0	0	0.029	0.029	0.029	0	0	0	2	2	2	0	0	0	2	2	2	Unidentified	(K)STVQFDTTNSR(Y),(R)YSITGNCINIAK(L)	Unidentified	Unidentified	NCAM1_MOUSE	Neural cell adhesion molecule 1	P13595	Mus musculus	Cell adhesion	Membrane	Protein binding
63	174	Calretinin-like [Exaiptasia pallida]	XP_020905743.1	26 kDa	0.0074	0	0	0	0.11208	0.057965	0.11807	0	0	0	0.0955	0.0455	0.0864	0	0	0	2	1	2	0	0	0	2	1	2	Unidentified	(K)LDSTSFYETFR(K),(K)EVMSSVDFMK(I)	Unidentified	Unidentified	CALB2_BOVIN	Calretinin	Q3ZBY3	Bos taurus	Unknown	Unknown	Metal ion binding
64	175	Macrophage migration inhibitory factor homolog [Exaiptasia pallida]	XP_020893764.1	13 kDa	0.16	0	0	0	0.243	0.1183	0	0	0	0	0.224	0.112	0	0	0	0	2	1	0	0	0	0	2	1	0	Unidentified	(M)PYLQIQTNIPAAK(I),(K)EPTAIVQLTNIGR(H)	Unidentified	Unidentified	MIFH_TRITR	Macrophage migration inhibitory factor homolog	P81748	Trichuris trichiura	Signal transduction	Extracellular region	Isomerase activity
65	176	Laminin subunit alpha-like [Exaiptasia pallida]	XP_020913308.1	246 kDa	0.12	0	0	0	0	0.0059961	0.011558	0	0	0	0	0.0058	0.0116	1	1	1	0	1	2	0	0	0	0	1	2	Unidentified	(R)AGVASGLANCDER(T),(R)GCQDCQCDISGVR(G)	Unidentified	Unidentified	LAMA_DROME	Laminin subunit alpha	Q00174	Drosophila melanogaster	Cell adhesion	Extracellular region	Protein binding
66	179	Hephaestin-like protein [Exaiptasia pallida]	XP_020906986.1	126 kDa	0.024	0	0	0	0.010665	0.02377	0.011235	0	0	0	0.0134	0.0259	0.0134	0	0	0	1	2	1	0	0	0	1	2	1	Unidentified	(K)DANTGLVGPLIVCK(R),(R)GDVYDLFPGVFATVK(M)	Unidentified	Unidentified	HEPHL_ACRMI	Hephaestin-like protein	B3EWZ9	Acropora millepora	Oxidation-reduction process	Membrane	Oxidoreductase activity
67	180	High mobility group protein B1-like [Exaiptasia pallida]	XP_020911699.1	43 kDa	0.026	0	0	0	0.031505	0.071961	0.033188	0	0	0	0.0373	0.0667	0.0373	0	0	0	1	2	1	0	0	0	1	2	1	Unidentified	(K)RPLSAYLYFTK(E),(K)RNPTAYFIFLSEFR(K)	Unidentified	Unidentified	HMGB3_BOVIN	High mobility group protein B3	Q32L31	Bos taurus	Translation	Nucleus	Nucleotide binding
68	181	C3 and PZP-like alpha-2-macroglobulin domain-containing protein 8 isoform X1 [Exaiptasia pallida]	XP_020898336.1 (+1)	190 kDa	0.023	0	0	0	0.0070742	0.015699	0.0074521	0	0	0	0.00761	0.0158	0.00819	0	0	0	1	2	1	0	0	0	1	2	1	Unidentified	(R)FFKPGLPFYGQLR(V),(K)AAPGSTVALAGVDK(S)	Unidentified	Unidentified	A2MG_BOVIN	Alpha-2-macroglobulin	Q7SIH1	Bos taurus	Regulation of proteolysis	Extracellular region	Protease inhibitor
69	183	DNA-directed RNA plymerase subunit beta. hypothetical protein NEMVEDRAFT_v1g225894, partial [Nematostella vectensis]	XP_001617672.1	44 kDa	0.026	0	0	0	0.030939	0.070623	0.032592	0	0	0	0.0222	0.042	0.0222	0	0	0	1	2	1	0	0	0	1	2	1	Unidentified	(R)KGLADTALK(T),(R)DITGGLPR(V)	Unidentified	Unidentified	RPOC_CYTH3	DNA-directed RNA polymerase subunit beta	Q11QA6	Cytophaga hutchinsonii	Transcription	Nucleus	Transferase activity
70	184	Gamma-glutamyltranspeptidase 1-like [Exaiptasia pallida]	XP_020898660.1	69 kDa	0.13	0	0	0	0.06211	0	0.042595	0	0	0	0.058	0	0.0338	0	0	0	3	0	2	0	0	0	2	0	1	Unidentified	(K)EINAEGGIFSVDDLK(E),(R)YIPTTLAQVFMNYYWFGDSLK(D)	Unidentified	Unidentified	GGT1_PIG	Gluta	P20735	Sus scrofa	Metabolic process	Membrane	Transferase activity
71	185	Predicted protein [Nematostella vectensis]	XP_001641545.1 (+2)	24 kDa	0.2	0	0	0	0.058282	0.13727	0.061395	0	0	0	0.0648	0.116	0.0509	0	0	0	1	2	1	0	0	0	1	2	1	Unidentified	(K)LVLLGESAVGK(S),(K)TAMNVNDIFLAIAK(K)	Unidentified	Unidentified	RAB5C_CANLF	Ras-related protein Rab-5C	P51147	Canis lupus familiaris	Protein transport	Endosome	Nucleotide binding
72	186	Poly(U)-specific endoribonuclease-B-like [Exaiptasia pallida]	XP_020917145.1	33 kDa	0.027	0	0	0	0.042043	0.097211	0.044289	0	0	0	0.0424	0.0919	0.0424	0	0	0	1	2	1	0	0	0	1	2	1	Unidentified	(R)EVVTQEEINENR(I),(R)DSSGFEHVFVGETR(D)	Unidentified	Unidentified	ENDUB_DANRE	Poly(U)-specific endoribonuclease-B	Q503V9	Danio rerio	Endocytosis	Endosome	Nucleotide binding
73	187	Calnexin-like [Exaiptasia pallida]	XP_020910870.1	65 kDa	0.019	0	0	0	0.020838	0.022925	0.045007	0	0	0	0.028	0.028	0.0717	0	0	0	1	1	2	0	0	0	1	1	2	Unidentified	(K)LIADGEGFSPETFTDK(S),(R)YTIMFGPDK(C),(K)THLFTLVVKPDNTFEVLVDQESVSK(G)	Unidentified	Unidentified	CALX_MOUSE	Calnexin	P35564	Mus musculus	Protein folding	Endoplasmic reticulum	Chaperone
74	189	Unconventional myosin-XVIIIa-like isoform X1 [Exaiptasia pallida]	XP_020914889.1 (+1)	249 kDa	0.37	0	0	0	0	0.011946	0.011438	0	0	0	0	0.0142	0.0142	0	0	0	0	2	2	0	0	0	0	2	2	Unidentified	(R)mSGDFGFALR(R), (K)TVHFVEPVGPNTATGILPGDR(L).	Unidentified	Unidentified	MY18A_HUMAN	Unconventional myosin-XVIIIa	Q92614	Homo sapiens	Cellular component organization	Cytoskeleton	Protein binding
75	190	Inactive tyrosine-protein kinase 7-like [Exaiptasia pallida]	XP_020896825.1	114 kDa	0.012	0	0	0	0.023943	0.012986	0.012434	0	0	0	0.0204	0.0107	0.0107	0	0	0	2	1	1	0	0	0	2	1	1	Unidentified	(K)INSQNALVFK(K),(K)EALGGDNLPSR(F)	Unidentified	Unidentified	PTK7_MOUSE	Inactive tyrosine-protein kinase 7	Q8BKG3	Mouse	Phosphorylation	Membrane	Kinase activity
76	191	Lipoxygenase homology domain-containing protein 1-like isoform X1 [Orbicella faveolata]	XP_020601065.1 (+1)	273 kDa	0.011	0	0	0	0.0099041	0.0054159	0.0051858	0	0	0	0.0074	0.0037	0.0037	0	0	0	2	1	1	0	0	0	2	1	1	Unidentified	(R)LYTVSANIR(D), (K)SPDVGEITK(L).	Unidentified	Unidentified	LOXH1_HUMAN	Lipoxygenase homology domain-containing protein 1	Q8IVV2	Homo sapiens	Cellular detoxification	Cell projection	Antioxidant activity
77	192	A disintegrin and metalloproteinase with thrombospondin motifs 16-like [Exaiptasia pallida]	XP_020906830.1	105 kDa	0.018	0	0	0	0.01282	0.014104	0.027427	0	0	0	0.0125	0.00935	0.0218	0	0	0	1	1	2	0	0	0	1	1	2	Unidentified	(K)LYDWVYNPK(R),(K)TCNDGSLGQQSR(E)	Unidentified	Unidentified	ATS16_HUMAN	A disintegrin and metalloproteinase with thrombospondin motifs 16	Q8TE57	Homo sapiens	Proteolysis	Extracellular region	Peptidase activity
78	193	Elongation factor 1-gamma-like [Exaiptasia pallida]	XP_020896757.1	49 kDa	0.026	0	0	0	0.027931	0.063532	0.029423	0	0	0	0.0238	0.0618	0.0238	0	0	0	1	2	1	0	0	0	1	2	1	Unidentified	(K)VPAFETSDGK(Y),(K)VYMNEETDVSIPYFWK(N)	Unidentified	Unidentified	EF1G_MOUSE	Elongation factor 1-gamma	Q9D8N0	Mus musculus	Protein biosynthesis	Cytoplasm	Elongation factor
79	196	Laminin subunit beta-1-like [Exaiptasia pallida]	XP_020906917.1	192 kDa	0.0058	0	0	0	0.014152	0.0077195	0.014908	0	0	0	0.00576	0.00576	0.0121	0	0	0	1	1	2	0	0	0	1	1	2	Unidentified	(K)EQEECSYCDSR(N),(R)TSAANSEIDR(L)	Unidentified	Unidentified	LAMB1_HUMAN	Laminin subunit beta-1	P07942	Homo sapiens	Cell adhesion	Extracellular region	Structural molecule activity
80	197	Laminin subunit alpha-2-like [Exaiptasia pallida]	XP_020913156.1	186 kDa	0.023	0	0	0	0.0072268	0.016041	0.0076129	0	0	0	0.00836	0.0143	0.00836	0	0	0	1	2	1	0	0	0	1	2	1	Unidentified	(R)NIINIAGGIADTLK(S),(K)GDFIVLELVK(G)	Unidentified	Unidentified	LAMA4_HUMAN	Laminin subunit alpha-4	Q16363	Homo sapiens	Cell adhesion	Extracellular region	Structural molecule activity
81	198	Allograft inflammatory factor 1-like [Exaiptasia pallida]	XP_020916259.1	17 kDa	0.53	0	0	0.13008	0.17767	0.089027	0	0	0	0.0541	0.223	0.0541	0	0	0	0	2	1	0	0	0	0	2	1	0	Unidentified	(K)MIAEVDTNNSGTIHYNEFLTMMLGK(K),(K)LILMFEEK(K)	Unidentified	Unidentified	AIF1_HUMAN	Allograft inflammatory factor 1	P55008	Homo sapiens	Actin filament polymerization	Cytoplasm	Protein binding
		Proteins identified in both Anthopleura and Lebrunia species				Quantitative Value (emPAI)						Percent Coverage						Exclusive Unique Spectrum Count						Exclusive Unique Peptide Count
		Refseq_Cnidaria				Anthopleura	Anthopleura	Anthopleura	Lebrunia	Lebrunia	Lebrunia	Anthopleura	Anthopleura	Anthopleura	Lebrunia	Lebrunia	Lebrunia	Anthopleura	Anthopleura	Anthopleura	Lebrunia	Lebrunia	Lebrunia	Anthopleura	Anthopleura	Anthopleura	Lebrunia	Lebrunia	Lebrunia	Tryptic peptide sequence		Anthopleura transcriptome		Uniprot
	Santos_20170717_Refseq_Cnidaria_20170801_AD1-3_LD1-3_SCAFF4	Identified Proteins (202)	Accession Number	Molecular Weight	T-Test (p-value): (p < 0.05)	AD1	AD2	AD3	LD1	LD2	LD3	AD1	AD2	AD3	LD1	LD2	LD3	AD1	AD2	AD3	LD1	LD2	LD3	AD1	AD2	AD3	LD1	LD2	LD3	Anthopleura	Lebrunia	Code	Sequence	Code	Name protein	Accession Number	Species	GO-Biological process	GO-Cellular component	GO-Molecular function
1	1	Filamin-A-like [Exaiptasia pallida]	XP_020896073.1	349 kDa	0.00022	0.22401	0.24082	0.27989	0.52817	0.55275	0.50286	0.114	0.12	0.116	0.278	0.276	0.267	35	38	38	89	86	83	26	28	27	67	66	61	(K)QALLAWVK(S),(R)VDELSMMTYVSYFPEAK(L),(K)KPADFTVFXQGAGR(G),(K)VEQEVSVK(D),(R)APFTVDTR(G),(R)GAGDGELDVFVEGPLGEEK(V),(R)GAGDGELDVFVEGPLGEEKVDIK(N),(K)GAGIDSLGFAVEGPAQAEIK(C),(K)GAGEGGLGLTIEGPSEAK(I),(K)VKVEGPGIEPGIR(A),(K)VEGPGIEPGIR(A),(R)AGEPADIDIDTR(L),(K)VDVLPPTDASK(C),(R)AGPPFDASK(V),(R)DAGPGGLSLAIEGPSK(A),(R)LLLNGDNTLGVAFTPR(E),(R)DAGYGGLGLSIEGPSK(A),(K)AEINCVDNEDGTCSVDYLPTEPGK(Y),(R)GEFTVWT…	(K)QALLAWVK(S),(R)VDELSMMTYVSYFPEAK(L),(R)LGVTVFGPGK(V),(R)APFTVDTR(G),(R)GAGDGELDVFVEGPLGEEK(V),(K)GVAGKPCHFTVETK(G),(K)GAGIDSLGFAVEGPAQAEIK(C),(K)YAVHVTCGDDDIPK(S),(K)SPFMVPISPAGDASK(A),(K)GPGLEPQGICAGAPAEFTVFTK(D),(K)GAGEGGLGLTIEGPSEAK(I),(K)DLGDGSCDVDYWPNEPGDYMINILFADQHIPGSPFK(A),(K)VKVEGPGIEPGIR(A),(K)VEGPGIEPGIR(A),(R)AGEPADIDIDTR(L),(R)LAGDAPLEVTVVDELNSPVK(C),(R)LAGDAPLEVTVVDELNSPVKCDIEEEE…	c31886_g1_i1	MDPSRMDDFEMPDSDPTAADAEWKKIQQNTFTRWCNEHIKCVNQYIYNLETDLCDGLKLIALLQVLSHKKLPRHNKKPVFKSQKIENVSIALKFIEDENIRLVNIDASDIVKGNLKLILGLVWTLILKYQISMPYLEDDEDEGGGGSKMTPKQALLAWVKSKMPESVPMDNFTTHWNNGIAIACLVDAVAPGLLPECEDLDPKDRLQNAQQAMKLAQDWLDIPQVLDPADMVNPKVDELSMMTYVSYFPEAKLKPGAPLRPRVHPASKCYAKGPGIEPRGLVVKKPADFTVFTQGAGRGRLGVSVIGPGKVEQEVSVKDNEDHTYSCQYVPQKPGKYDVHVKWNGRHIPKSPFRVEVSSDLDAGKAYAKGPGLAPTGVVAGKYTDFTVFTKGAGEGKVT…	FLNA_MOUSE	Filamin-A	Q8BTM8	Mus musculus	Cellular component organization	Cytoskeleton	Actin binding
2	2	Major antigen-like [Exaiptasia pallida]	XP_020895143.1	326 kDa	0.00029	0.042035	0.011431	0.026836	0.61397	0.76857	0.60478	0.0159	0.00673	0.0124	0.189	0.199	0.182	7	2	4	92	100	88	5	2	4	66	70	63	(K)SLLQSSEDEK(H),(R)YYEIETLYK(A),(K)INELENLLAR(V),(K)ISILEQQIR(D),(R)ERNEELEDELTVLQHR(I),(R)NEELEDELTVLQHR(I)	(K)LQMEIDNLK(R),(K)LQMEIDNLKR(Q),(R)LMDKETENEMLK(R),(K)ETENEMLK(R),(K)ETENEMLKR(E),(R)ADKIDLQK(R),(R)DALRDEIAVLQAK(L),(R)KYEASLINSQK(Q),(K)YEASLINSQK(Q),(K)KNSDLEDR(L),(R)VENGDLQR(E),(R)LKQLENEVSR(Y),(K)ISDLESLYEVTAK(E),(K)TNLAPLEK(R),(R)SENSRDDLER(Q),(K)NANLEAQLDAAQK(A),(K)TIDDMKNTIR(Q),(K)EMQADLNEANK(R),(K)EMQADLNEANKR(A),(K)DAFEKDATIEALK(S),(K)DATIEALK(S),(K)SLLQSSEDEK(H),(K)SLLQSSEDEKHK(L),(R…	Unidentified	Unidentified	CIP1_ARATH	COP1-interactive protein 1	F4JZY1	Arabidopsis thaliana	Response to stress	Cytoskeleton	Actin binding
3	3	Actin, cytoplasmic-like [Exaiptasia pallida]	XP_020916414.1	42 kDa	0.002	3.9622	5.0006	4.1165	1.4731	1.6207	2.0598	0.622	0.628	0.593	0.572	0.521	0.593	27	30	26	20	20	23	16	17	16	15	14	15	(K)AGFAGDDAPR(A),(K)DSYVGDEAQSK(R),(K)IWHHTFYNELR(V),(R)VAPEEHPVLLTEAPLNPK(A),(R)EKMTQIMFETFNSPAMYVAIQAVLSLYASGR(T),(K)MTQIMFETFNSPAMYVAIQAVLSLYASGR(T),(R)DLTDYLMK(I),(R)GYSFTTTAER(E),(K)LCYVALDFEQEMQTAAASSSLEK(S),(K)SYELPDGQVITIGNER(F),(R)CPEAMFQPSFLGMESAGIHETTYNSIMK(C),(R)KDLYANTVLSGGSTMYPGIADR(M),(K)DLYANTVLSGGSTMYPGIADR(M),(K)EIANLAPPTMK(I),(R)KYSVWIGGSILASLSTFQQMWISK(Q),(K)YSVWIGGSILASLSTFQQ…	(K)AGFAGDDAPR(A),(R)AVFPSIVGRPR(H),(K)DSYVGDEAQSK(R),(K)IWHHTFYNELR(V),(R)VAPEEHPVLLTEAPLNPK(A),(K)MTQIMFETFNSPAMYVAIQAVLSLYASGR(T),(R)TTGIVMDSGDGVSHTVPIYEGYALPHAILR(L),(R)DLTDYLMK(I),(R)GYSFTTTAER(E),(K)LCYVALDFEQEMQTAAASSSLEK(S),(K)SYELPDGQVITIGNER(F),(R)KDLYANTVLSGGSTMYPGIADR(M),(K)DLYANTVLSGGSTMYPGIADR(M),(K)EIANLAPPTMK(I),(R)KYSVWIGGSILASLSTFQQMWISK(Q),(K)YSVWIGGSILASLSTFQQMWISK(Q)	c22293_g1_i1	MGDEEVAALVVDNGSGMCKAGFAGDDAPRAVFPSIVGRPKMPGIMVGMDQKDSYVGDEAQSKRGVLTLKYPIEHGIVTNWDDMEKIWHHTFYNELRVAPEEHPVLLTEAPLNPKANRERMTQIMFETFNVPAMYVAIQAVLSLYASGRTTGIVMDSGDGVSHTVPIYEGYALPHAILRLDLAGRDLTEYMMKILTERGYSFT	ACT_ACHBI	Actin	P26182	Achlya bisexualis	Unknown	Cytoskeleton	Nucleotide binding
4	4	Filamin A- predicted protein [Nematostella vectensis]	XP_001639010.1	364 kDa	0.00049	0.25747	0.25857	0.31782	0.067398	0.07415	0.062079	0.112	0.123	0.118	0.0683	0.0716	0.0653	21	22	23	4	5	3	12	13	13	4	4	3	(K)QALLAWVK(S),(K)LAQDWLDIPQVLDPADMVNPK(V),(K)VDELSMMTYVSYFPEAK(L),(R)VEVSSDLDAGK(A),(K)GPGLAPTGVVAGK(Y),(R)APFTVDTR(G),(R)GAGDGELDVFVEGPLGEEK(V),(R)GAGDGELDVFVEGPLGEEKVDIK(N),(K)AYGPGLER(G),(K)GAGEGGLGLTIEGPSEAK(I),(K)GAGAGGLSLAIEGPSEAK(L),(K)FADEHIPGSPFTAK(A),(R)AGPPFDASK(V),(K)EPCEFTVVTR(D),(R)HVQNSPFSVMVQAQR(I),(K)DNTLGVSFVPVEPGEHK(I),(K)TLSAVFIPNETGEHIINVK(K),(K)HVTGSPFSVMVSGPGPADASK(V),(R)D…	(K)FIEDENIR(L),(K)QALLAWVK(S),(K)VDELSMMTYVSYFPEAK(L),(R)APFTVDTR(G),(R)GAGDGELDVFVEGPLGEEK(V),(K)AYGPGLER(G),(K)GAGEGGLGLTIEGPSEAK(I),(K)HVPGSPFK(V),(K)FADEHIPGSPFTAK(A),(R)AGPPFDASK(V),(K)EPCEFTVVTR(D),(R)DAGYGGLGLSIEGPSK(A),(K)AEINCVDNEDGTCSVDYLPTEPGK(Y),(R)DAGPGGLAIAVEGPAK(A),(K)EFGDHLVNVK(F),(K)MNCTENQDGTYQVTYYPVVAGEYTISIK(F),(R)AVLGQPNSFTVNASNAGR(G),(R)GSLMVGVEGPAIPAK(E),(K)HIPGSPFHVTV(-).	c31886_g1_i1	MDPSRMDDFEMPDSDPTAADAEWKKIQQNTFTRWCNEHIKCVNQYIYNLETDLCDGLKLIALLQVLSHKKLPRHNKKPVFKSQKIENVSIALKFIEDENIRLVNIDASDIVKGNLKLILGLVWTLILKYQISMPYLEDDEDEGGGGSKMTPKQALLAWVKSKMPESVPMDNFTTHWNNGIAIACLVDAVAPGLLPECEDLDPKDRLQNAQQAMKLAQDWLDIPQVLDPADMVNPKVDELSMMTYVSYFPEAKLKPGAPLRPRVHPASKCYAKGPGIEPRGLVVKKPADFTVFTQGAGRGRLGVSVIGPGKVEQEVSVKDNEDHTYSCQYVPQKPGKYDVHVKWNGRHIPKSPFRVEVSSDLDAGKAYAKGPGLAPTGVVAGKYTDFTVFTKGAGEGKVT…	FLNA_MOUSE	Filamin-A	Q8BTM8	Mus musculus	Cellular component organization	Cytoskeleton	Actin binding
5	5	Fructose-bisphosphate aldolase C-like [Exaiptasia pallida]	XP_020893763.1	39 kDa	0.0071	0.45182	0.44087	0.25671	0.78151	0.85981	1.0465	0.214	0.214	0.169	0.331	0.322	0.339	7	7	4	13	13	15	6	6	4	10	10	10	(R)IAEAIVAPGK(G),(K)GILAADESTGTMGK(R),(K)ADDGTPFVK(I),(K)ENANVLAR(Y),(R)YATICQQNGLVPIVEPEVLCDGEHTLER(A),(R)ALQASALK(A).	(R)IAEAIVAPGK(G),(K)GILAADESTGTMGK(R),(K)DAISGVILFEETLYQK(A),(K)ADDGTPFVK(I),(R)ISDKTPSELAMK(E),(K)TPSELAMKENANVLAR(Y),(R)YATICQQNGLVPIVEPEVLCDGEHTLER(A),(R)AQTVTEAVLSHQYK(A),(K)KPWALTFSFGR(A),(R)ALQASALK(A).	c26015_g1_i1	MDAPLTPELKAELKRIAEAIVAPGKGILAADESTGTMGKRLANIGVENSEENRRQYRQLLFTSGPEMPKSISGVILFEETLYQKADDGTPFVKLIRDQGIIPGIKVDKGVVPLAGTVGEGTTQGLDGLSARCEQYKKDGCDFAKWRCVLKITDHTPSELAMKENANVLARYATICQQNGIVPIVEPEVLCDGEHTLERAQKVTEAVLSAQYKALVDHHVYLEGSLLKPNMVTPGQSCPNKSTPEQCARATVEALQRTVPTAVPGITFLSGGQSEEQASVHLNAINQYPGKKPWKLTFSFGRALQASALKAWVGKKENIKAGQAEFLKRAKANGEAAKGEYKGGASLAGDQSLFVANHQY	ALDOC_CARAU	Fructose-bisphosphate aldolase C	P53448	Carassius auratus	Metabolic process	Unknown	Lyase
6	6	Protein disulfide-isomerase 2-like [Exaiptasia pallida]	XP_020900534.1	58 kDa	0.85	0.27714	0.2251	0.16462	0.19553	0.21512	0.28102	0.108	0.0923	0.0769	0.158	0.165	0.177	7	6	4	7	7	9	5	4	3	7	7	8	(R)ANQLPLVTEFSDETAPK(I),(K)QLAPIWDK(L),(K)MDSTANEVEGVK(V),(K)VQSFPTIK(F),(K)EGDVVDYNGGR(T)	(K)EVAVIGFFADK(E),(K)EVAVIGFFADKESEAAK(A),(R)NDYDGKYDADEIQK(F),(R)ANQLPLVTEFSDETAPK(I),(R)IMEFFGIQTK(E),(R)LINLADDDMTK(Y),(K)QLAPIWDK(L),(K)MDSTANEVEGVK(V),(K)EGDVVDYNGGR(T)	c27447_g1_i1	GKPSISGPYCWLIVLFLSLPSTEKSLLKTLSSNHSKMKPLVVLFLTYLALAHSEEIQEEEDVLVLTEKNFDEAIAANKHILVEFYAPWCGHCKALAPEYAKAAGQLKKEESPIKLAKVDATAQSKLGEKFQVQGYPTIKFFKDGKPSEYGGGRTHPEIVAWLNKKTGPPAKPLASAEEVQKFLEKEVAVVGFFKDQESDAAKAFLSAADGIDDVEFAIVSDAAIASEHKVDGDKIVLFKKFDEGRNDYDGEYEFEKIQKFVKANQLPLVTEFSDETAPKIFGGEVKHHILLFANKKSDDFKTHHDAFSASAKGFKGKVLFVFVNGEVEDNLRIMEFFGISAKDLPTVRLINLADDEMTKFKPESSDITTEVTSKFVQDFLDKKIKPHLLTQDVPADWDA…	PDI2_CAEEL	Protein disulfide-isomerase 2	Q17770	Caenorhabditis elegans	Protein folding	Endoplasmic reticulum	Isomerase
7	7	78 kDa glucose-regulated protein-like [Exaiptasia pallida]	XP_020917618.1	75 kDa	0.0067	0.20514	0.16777	0.23265	0.098861	0.10876	0.10414	0.121	0.0962	0.133	0.105	0.104	0.104	7	6	7	5	5	5	6	5	6	5	5	5	(K)VGTVIGIDLGTTYSCVGVFK(N),(R)VEIIANDQGNR(I),(R)ITPSYVAFTPEGER(L),(K)VTHAVVTVPAYFNDAQR(R),(R)IINEPTAAAIAYGMDK(K),(K)ITITNDQNR(L),(K)ELEDVVQPIVSK(L).	(K)SQIFSTAADNQQTVTIQVFEGERPMTK(D),(K)FDLNNIPPAPR(G),(K)ITITNDQNR(L),(K)NELESYTYSLK(N),(K)KELEDVVQPIVSK(L).	c23602_g1_i1	MKYFSVVFTVALATSVLLVNGEEKKEEKKSEKEKVGTVIGIDLGTTYSCVGVFKNGRVEIIANDQGNRITPSYVAFTPEGERLIGDGAKNQLTSNPENTIFDIKRLIGRNWDDPSVKHDLKYFPFKVVEKNKKPHVQVSTSTGTKTFTAEEISAMVLGKMKETAEAYLGKKVTHAVVTVPAYFNDAQRQATKDAGVIAGLNVMRIINEPTAAAIAYGMDKKEGEKNILVFDLGGGTFDVSLLTIDNGVFEVVATNGDTHLGGEDFDQRVMEHFIKLYKKKKGKDIRKDNRAVQKLRREVEKAKRALSAQHQARIEIESFFEGEDFSEMLTRARFEELNMDLFKSTLKPVRKVLEDADLKKNEIQEIVLVGGSTRIPKVQQLVKDYFNGKEPSRGINPDE…	BIP_CHICK	Endoplasmic reticulum chaperone BiP	Q90593	Gallus gallus	Protein folding	Endoplasmic reticulum	Chaperone
8	9	Alpha-enolase-like isoform X1 [Exaiptasia pallida]	XP_020909891.1	52 kDa	< 0.00010	0.49375	0.41933	0.41908	0.02606	0	0.027452	0.195	0.176	0.159	0.0314	0	0.0314	10	9	8	0	0	0	7	6	5	0	0	0	(R)AAVPSGASTGIYEALELR(D); (K)LGANAILGVSLAVCK(A); (K)TVILPVPAFNVINGGSHAGNK(L); (K)LAMQEFMLLPTGASSFR(E); (R)MGSEIYQNLK(K); (K)DGKYDLDFK(N); (K)VSIQIVGDDLTVTNPK(R); (K)ACNCLLLK(V)	unidentified	c30804_g1_i1	MANVTKVHAREIFDSRGNPTVEVEITTSKGMFRAAVPSGASTGIYEALELRDKEPGRFLGKGVKKAVDNVNSTIGPALISKALEVTDQKGIDEFMLQLDGTENKAKLGANAILGVSLAVCKAGAAHKGVPLYKYISELAGNKTVILPVPAFNVINGGSHAGNKLAMQEFMLLPTGASSFREAMRMGSEIYQNLKKVVKEKYGIDATNVGDEGGFAPNIQDNREGLELLKVAIEKAGYTGKIDIGMDVAASEFHKDGKYDLDFKNKNSDPSKWVTSEALRDIYLGFIKDYPVVSIEDAYDQDHWDAWTDLTGKVSIQIVGDDLTVTNPKRIQTAIDKKACNCLLLKVNQIGSVTESINACKLAQKNGWGVMVSHRSGETEDTFIADLVVGLCAGQIKTGA…	ENOA_HUMAN	Alpha-enolase	P06733	Homo sapiens	Metabolic process	Cytosol	Lyase
9	10	Calmodulin beta. predicted protein [Nematostella vectensis]	XP_001638581.1	17 kDa	0.018	2.4302	1.4733	1.3168	3.2603	2.9143	3.4344	0.658	0.584	0.47	0.792	0.718	0.792	9	7	6	12	11	12	6	4	3	9	10	11	(K)EAFSLFDKDGDGTITTK(E),(R)SLGQNPTEAELQDMINEVDADGNGTIDFPEFLTMMAR(K),(K)MKDTDSEEEIR(E),(R)VFDKDGNGFISAAELR(H),(K)DGNGFISAAELR(H),(K)LTDEEVDEMIR(E),(R)EADIDGDGQVNYEEFVK(M)	(K)EAFSLFDK(D),(K)EAFSLFDKDGDGTITTK(E),(K)DGDGTITTK(E),(R)SLGQNPTEAELQDMINEVDADGNGTIDFPEFLTMMAR(K),(K)MKDTDSEEEIR(E),(K)DTDSEEEIR(E),(R)VFDKDGNGFISAAELR(H),(K)DGNGFISAAELR(H),(R)HVMTNLGEK(L),(K)LTDEEVDEMIR(E),(R)EADIDGDGQVNYEEFVK(M)	c18884_g1_i1	MADQLTEEQIAEFKEAFSLFDKDGDGTITTKELGTVMRSLGQNPTEAELQDMINEVDADGNGTIDFPEFLTMMARKMKDTDSEEEIREAFRVFDKDGNGFISAAELRHVMTNLGEKLTDEEVDEMIREADIDGDGQVNYEEFVKMMTSK	CALM_METSE	Calmodulin	Q95NR9	Metridium senile	Signal transduction	Unknown	Metal ion binding
10	12	Filamin-A-like isoform X1 [Orbicella faveolata]	XP_020621878.1	322 kDa	0.0012	0.095273	0.099673	0.11585	0.048292	0.05313	0.046011	0.0505	0.0502	0.0478	0.0328	0.0365	0.0298	5	4	4	1	1	0	4	3	3	1	1	0	(K)LIALLQVLSHK(K), (K)YTDFTVFTK(G), (K)FGGDHIPGSPFK(V), (K)CVAAGPGLER(G).	(K)YTDFTVFTK(G)	c31886_g1_i1	MDPSRMDDFEMPDSDPTAADAEWKKIQQNTFTRWCNEHIKCVNQYIYNLETDLCDGLKLIALLQVLSHKKLPRHNKKPVFKSQKIENVSIALKFIEDENIRLVNIDASDIVKGNLKLILGLVWTLILKYQISMPYLEDDEDEGGGGSKMTPKQALLAWVKSKMPESVPMDNFTTHWNNGIAIACLVDAVAPGLLPECEDLDPKDRLQNAQQAMKLAQDWLDIPQVLDPADMVNPKVDELSMMTYVSYFPEAKLKPGAPLRPRVHPASKCYAKGPGIEPRGLVVKKPADFTVFTQGAGRGRLGVSVIGPGKVEQEVSVKDNEDHTYSCQYVPQKPGKYDVHVKWNGRHIPKSPFRVEVSSDLDAGKAYAKGPGLAPTGVVAGKYTDFTVFTKGAGEGKVT…	FLNA_MOUSE	Filamin-A	Q8BTM8	Mus musculus	Actin cytoskeleton organization	Cytoskeleton	Actin binding
11	14	Ras-related protein Rab-7a [Exaiptasia pallida]	XP_020907141.1	23 kDa	0.91	0.92063	0.71281	1.0441	0.803	1.0767	0.8459	0.429	0.38	0.429	0.517	0.551	0.517	7	6	7	8	9	8	7	6	7	8	9	8	(K)VIILGDSGVGK(T),(K)ATIGADFLTK(E),(R)LVTMQIWDTAGQER(F),(R)FQSLGVAFYR(G),(K)TLDSWRDEFLIQASPR(D),(R)DPENFPFVVLGNK(I),(K)EAINVEQAFQTIAK(N).	(K)VIILGDSGVGK(T),(K)ATIGADFLTK(E),(R)LVTMQIWDTAGQER(F),(R)FQSLGVAFYR(G),(R)GADCCVLVFDVTQPNTFK(T),(K)TLDSWRDEFLIQASPR(D),(R)DPENFPFVVLGNK(I),(K)NNIPYFETSAK(E),(K)EAINVEQAFQTIAK(N).	c20951_g1_i1	MASRKKVLLKVIILGDSGVGKTSLMNQYVNKKFSNQYKATIGADFLTKEVMVDDRLVTMQIWDTAGQERFQSLGVAFYRGADCCVLVFDVTQPNTFKTLDSWRDEFLIQASPRDPENFPFVVLGNKIDLENRAVSAKRAQAWCHSKNDIPYFETSAKEAINVEQAFQTIAKNALAQETDVELYNDFPDQIKLSNDSKQKSDGCPC	RAB7A_RAT	Ras-related protein Rab-7a	P09527	Rattus norvegicus	Autophagy	Lysosome	Hydrolase
12	15	Chitinase3- like. uncharacterized protein LOC110054708 [Orbicella faveolata]	XP_020616724.1	175 kDa	0.0017	0.13182	0.11583	0.091598	0.023524	0.025881	0.024781	0.0839	0.0661	0.0445	0.0223	0.0223	0.0178	11	10	7	3	3	3	9	8	5	3	3	3	(K)TQIAVGGWTHEEK(D), (R)LLLTAAVAAGLWTIK(G),(R)GVmFWAIDLDDFSGQHcGQGK(Y), (R)GVMFWAIDLDDFSGQHcGQGK(Y), (R)FTLLcNELR(A), (R)VcYYTNWSQYRPK(G), (K)TGHHTAmGPEGDKLTLPFAIWYWmNNR(D), (R)DTWEKPGIR(N), (K)IVLGLGTYGR(A),(K)YTGAEGFLAYFEIcK(M).	(K)FGFDGLDLDWEYPGmR(G), (K)IVLGLATYGR(A), (R)FTLLcNELR(A).	unidentified	unidentified	CHI10_DROME	Probable chitinase 10	Q9W5U2	Drosophila melanogaster	Metabolic process	Extracellular region	Hydrolase
13	16	Probable chitinase 10 [Exaiptasia pallida]	XP_020902099.1	107 kDa	0.001	0.2809	0.201	0.23362	0.039106	0.028248	0.041195	0.0901	0.089	0.0787	0.0404	0.0238	0.0352	12	9	9	3	2	3	7	6	6	3	2	3	(R)VCYHTNWSQYR(Q),(K)INQNNELAMYEWNDDKLYPR(F),(K)VFIDSVIR(V),(R)LLLTAAVSAGK(N),(K)IALGLGTYGR(S),(K)IGQILDLINLMAYDLR(G),(K)IVLGLGTYGR(A),(K)GLAGAMFWALDLDDFSGQSCGKGNYPLMNAVK(K).	(K)ILDLINLMAYDLR(G),(K)IALGLGTYGR(S),(R)NELAMYEWNDDKLYPR(F).	unidentified	unidentified	CHI10_DROME	Probable chitinase 11	Q9W5U3	Drosophila melanogaster	Metabolic process	Extracellular region	Hydrolase
14	17	Heat shock cognate 71 kDa protein-like [Exaiptasia pallida]	XP_020917426.1	71 kDa	0.041	0.292	0.14402	0.20561	0.081395	0.089549	0.085744	0.112	0.094	0.112	0.0971	0.074	0.0971	7	3	5	4	4	4	4	2	4	4	4	4	(K)APAVGIDLGTTYSCVGVFQHGK(V),(K)VEIIANDQGNR(T),(K)DAGVIAGINVMR(I),(R)IINEPTAAAIAYGLDK(K),(R)IINEPTAAAIAYGLDKK(V),(K)SINPDEAVAYGAAVQAAILHGDK(D),(K)FELTGIPPAPR(G)	(R)IINEPTAAAIAYGLDK(K),(R)GVPQIDVTFDVDANGILNVSAVDK(S),(K)NSLESYAYNMK(Q),(K)QTIEDDKVK(D),(K)EIEQVCSPVITK(L)	c27026_g1_i1	MAKAPAVGIDLGTTYSCVGVFQHGKVEIIANDQGNRTTPSYVAFTDTERLVGDPAKNQVAMNPINTVFDAKRLIGRRFEDPGVQDDMTHWPFQVISEGGRPKIRVEFKGETKTFFAEEISSMVLNKMKETAEAYLGTKVTDAVITVPAYFNDSQRQATKDAGVISGINVLRIINEPTAAAIAYGLDKKVGAERNVLIFDLGGGTFDVSILSIEEGIFEVKSTAGDTHLGGEDFDNKMVTHFVEEFKRKYKKNLTSNKRALRRLRTACERAKRTLSSSTQASIEIDSLFEGIDFYTSITRARFEELNSELFRKTKEPVEKSLRDAKLGKNEIHDIVLVGGSTRIPKIQSILREIFTDKELNKSINPDEAVAYGAAVQAAILSGDKHENVQDLLLLDVAPL…	HSP7D_MANSE	Heat shock 70 kDa protein cognate 4	Q9U639	Manduca sexta	Stress response	Nucleus	Nucleotide binding
15	18	Actin, cytoplasmic like. predicted protein [Nematostella vectensis]	XP_001637076.1	42 kDa	0.0004	5.1248	5.4398	5.8119	1.6218	1.9608	2.4688	0.675	0.68	0.709	0.517	0.547	0.568	8	7	6	4	4	6	3	3	3	2	2	2	(K)AGFAGDDAPR(A),(K)DSYVGDEAQSK(R),(K)IWHHTFYNELR(V),(R)VAPEEHPVLLTEAPLNPK(A),(R)EKMTQIMFETFNSPAMYVAIQAVLSLYASGR(T),(K)MTQIMFETFNSPAMYVAIQAVLSLYASGR(T),(R)TTGIVMDSGDGVTHTVPIYEGYALPHAILR(L),(R)DLTDYLMK(I),(R)GYSFTTTAER(E),(K)LCYVALDFEQEMQTAASSSSLEK(S),(K)SYELPDGQVITIGNER(F),(R)CPEAMFQPSFLGMESAGIHETTYNSIMK(C),(R)KDLYANTVLSGGSTMYPGIADR(M),(K)DLYANTVLSGGSTMYPGIADR(M),(R)KYSVWIGGSILASLSTFQQMWISK(Q),(K…	(K)AGFAGDDAPR(A),(R)AVFPSIVGRPR(H),(K)DSYVGDEAQSK(R),(K)IWHHTFYNELR(V),(R)VAPEEHPVLLTEAPLNPK(A),(K)MTQIMFETFNSPAMYVAIQAVLSLYASGR(T),(R)TTGIVMDSGDGVTHTVPIYEGYALPHAILR(L),(R)DLTDYLMK(I),(R)GYSFTTTAER(E),(K)SYELPDGQVITIGNER(F),(R)KDLYANTVLSGGSTMYPGIADR(M),(K)DLYANTVLSGGSTMYPGIADR(M),(R)KYSVWIGGSILASLSTFQQMWISK(Q),(K)YSVWIGGSILASLSTFQQMWISK(Q),(K)QEYDESGPSIVHR(K)	c30882_g1_i1	MEDEVAALVVDNGSGMCKAGFAGDDAPRAVFPSIVGRPRHQGVMVGMGQKDSYVGDEAQSKRGILSLKYPIEHGIVTNWDDMEKIWHHTFYNELRVAPEEHPVLLTEAPLNPKANREKMTQIMFETFNSPAMYVAIQAVLSLYASGRTTGIVFDSGDGVSHTVPIYEGYALPHAILRLDLAGRDLTDYLMKILTERGYSFTTTAEREIVRDIKEKLCYVALDFEQEMQTAASSSTLEKSYELPDGQVITIGNERFRCPESLFQPAFLGMESAGIHETCYNSIMKCDVDIRKDLYANTVLSGGSTMYPGIADRMQKEIANLAPPTMKIKIIAPPERKYSVWIGGSILASLSTFQQMWISKQEYDESGPSIVHRKCF	ACTA_STRPU	Actin, cytoskeletal 1A	P53472	Strongylocentrotus purpuratus	Unknown	Cytoskeleton	Nucleotide binding
16	19	EGF and laminin G domain-containing protein-like [Exaiptasia pallida]	XP_020893090.1	131 kDa	0.018	0.014539	0.028724	0	0.053893	0.085118	0.10747	0.00943	0.0172	0	0.0609	0.0678	0.0995	1	2	0	5	7	9	1	2	0	5	6	9	(R)DIISGANFK(G),(R)GRFEGCISGVK(V).	(R)FHSVEIQFR(G),(K)YPPEEGSKPESVIR(D),(R)DIMYKPNFISAQTVALASEYCR(Q),(K)HNYWWGGSGPDHPGK(C),(R)GDCIGGGNYWCNCDASR(D),(R)GILFHQGDK(T),(R)VDVWFNIK(E),(K)EVIIGSTGR(G),(R)GRFEGCISGVK(V),(K)VKEETVEPIK(W).	c31850_g1_i1	MARIVVTLLLWSSCLIPFSLAADTEGYFDGNAYAEYLLHRKPVKSSTNTIKLSFRTVQPNGLLLHGDSTGDEFGDYFTLELIGGKLRFALSFGRHQGIDDMRNITLGDELADNRYHSVVIEHNGRETWLKLDTTTKGEKHRRIETRYKELYLDDFFFIGGAHDFRRLRDIISGANFKGCMKGVEFNDRKLLQSLGGDATTLRKYGVKDNCPAEIDYTPITLNGRSSQFSTSINPRSNELKGRLKFRTYKNKGTLLSQAKSDGKGFELSYQPEAVELKVYIKDSPTTVSVRQVFKYRTVDKGMWHDVDFEISAARISLTVNTINDKRPPGSDFPQNFFTGSALVGGEFTGCIWDLTLNGGKFDPNTQKNNPDIQIDVCNITDFCFPSICKNFGKCSQDGK…	ELP_ACRMI	EGF and laminin G domain-containing protein	B8UU78	Acropora millepora	Unknown	Membrane	Unknown
17	20	Glutamate dehydrogenae like. uncharacterized protein LOC110241264 [Exaiptasia pallida]	XP_020902796.1	49 kDa	0.00015	0.27692	0.32629	0.31404	0.088268	0.097111	0.092984	0.0933	0.0933	0.0933	0.0644	0.0578	0.0644	6	7	6	3	3	3	5	5	5	3	3	3	(R)FHPTVNLSILK(F),(K)FLGFEQVLK(N),(R)EIGFLFGQYK(R),(R)IRNEFTGVLTGK(G),(R)NEFTGVLTGK(G).	(K)FLGFEQVLK(N),(K)KNSLTTLPMGGGK(G),(R)EIGFLFGQYK(R),(K)LAFVMELK(N),(K)YNCEFHEGK(R).	c27917_g1_i1	MMLRVLNRRGVSVLSRVGIVRCVSTTTPTLAQATDKSKDKEQYKFTSIDGFMDFVAKKNPGELEFHQAVHEVVTSIWDHLSENPYYNKHNVLERIVEPERVVIFRVPWRDDKGQINVNKGYRVEFNSAIGPYKGGLRFHPTVNLSILKFLGFEQVLKNSLTTLSMGGGKGGSNFDPKGKSDSEVMSFCQSFMSELQRHIGPNRDVPAGDIGVGGREIGFLFGQYKRLRNEFTGVLTGKGIAWGGSLVRPEATGYGLLYFVNEMLTNKGQSLKDKIITVSGSGNVAQYAVEKALELGGKVVSLSDSNGTVYDPNGIDKAKLAYVMELKNVKRGRIKEYAAKYNVEYHEGKRPWSIKCDIALPCATQNELNKSDAEMLVKNGCTLVGEGANMPTEPEAIKV…	DHE4_PRERU	NAD(P)-specific glutamate dehydrogenase	P95544	Prevotella ruminicola	Metabolic process	Cytoplasm	Oxidoreductase
18	21	Protein singed-like [Exaiptasia pallida]	XP_020902867.1	54 kDa	0.093	0.074058	0.15365	0.17858	0.21359	0.19515	0.30846	0.05	0.05	0.05	0.14	0.108	0.179	2	4	4	7	6	8	2	2	2	6	5	7	(K)WNIGLVNHASR(Y),(K)FSLEFHQTNLAFR(D).	(K)WNIGLVNHASR(Y),(R)YLTVETFGFK(L),(K)GNLCCEATER(E),(K)YAIVASNNK(Y),(K)FSLEFHQTNLAFR(D),(K)YLTAVGTGR(L),(K)ETVTKDELFVIEDSHPQCSFIGCNDR(R),(K)SPNGCYLK(G).	c30379_g1_i2	MPETAKWNIGLVNHASRYLTVETFGFTLNADGTSLRKKQMWVLEQDSDEGVYFKCHLGRYLTADPKGNLACEATEREPNARFTIVTKDGKWALKSAHNEYFGATGDQLKCVAKIGKTELWTVHLAMHPQVNLKSVLRKRYAHLDEASQDIKVSEIIPWGADAMVTLKFVDGSYAIVASNDKYLQSNGDLSDELTDECKFSIEFHQTNIAFRDHKGKYLTAVGPGRLQSKKDTVTKDELYILEDSHPQCSFIGHSDRRISIKQSMDVTANQAEMTDTEIFQVIFNKENNKVSFLSNNEKYWVANGGVATASSSEITPKAEFELEWHGNQIAFKANSGKYLTSKANGQLLDGTDEVSATGLFTVELVNRPLLVLRGEFGFVGCKGTTNRLECNRANYDVFH…	FSCN1_HUMAN	Fascin	Q16658	Homo sapiens	Cell migration	Cytoskeleton	Actin binding
19	22	Transaldolase-like [Exaiptasia pallida]	XP_020909935.1	36 kDa	0.01	0.32298	0.39653	0.46087	0.22787	0.19139	0.18326	0.158	0.195	0.195	0.176	0.124	0.127	5	6	6	5	4	4	4	5	5	4	3	3	(K)YKPTDGTTNPSLLLAASK(M),(R)LSFDVEGSIAK(A),(K)LSSTWEGIQAAR(I),(K)SVTAIYNYYK(K),(R)WLLNEDAMATEK(L)	(K)TFTTVVADTGDIQAIGK(Y),(K)YKPTDGTTNPSLLLAASK(M),(K)LSSTWEGIQAAR(I),(K)SVTAIYNYYK(K)	c21742_g1_i1	MVLPIPRLSWLLLRCLSTNISWKMLCSSGKKNGSTVEEQVTAAMDKLYVSFGTEILKIIPGRVSTEVDARLSFDVEGSIAKAKKFIELYKQQGIGKERVLIKLSSTWEGIQAARILEKENGIHCNLTLLFSFAQAVACAEAGVTLISPFVGRILDWFVKNTNQKYEPQDEPGVKSVTAIYNYYKKFGYKTVVMGASFRNTGEIVELAGCDNLTISPSLLEKLQNSKETVTRKVSVEEAQKLEITKVELDEKKFRWLLNEDAMATEKLAEGIRKFAADSVKLEDMIKEQLQAS	TALDO_MOUSE	Transaldolase	Q93092	Mus musculus	Metabolic process	Cytoplasm	Transferase activity
20	24	Calreticulin-like [Exaiptasia pallida]	XP_020900968.1	52 kDa	0.036	0.16269	0.11534	0.041981	0.22132	0.202	0.23314	0.0697	0.0697	0.0494	0.196	0.175	0.196	4	3	1	7	6	7	3	2	1	6	5	6	(K)NLHGDSPYMIMFGPDICGPGTK(K),(K)KVHVIFNYK(G),(K)VHVIFNYK(G).	(K)FYGDAEKDK(G),(K)FEKPFSNEGK(D),(K)HEQNIDCGGGYAK(I),(K)NLHGDSPYMIMFGPDICGPGTK(K),(K)KPEDWDDKK(Q),(K)KPEDWDDEIDGEWEAPMIDNPDYK(G).	c23438_g1_i1	MFLHRLVLLSLVSYVFSTDYFVEKFEDKSWEDRWVQSTKKGAEAGKFLLTAGKFYGDAEKDKGIKTSEDARFYAVSSKFDKPFSNEGKDLVIQFTVKHEQNIDCGGGYIKVFSSDLDQKNMHGDSPYLIMFGPDICGPGTKKVHVIFNYKGKNLLTKKEIRCKDDEMTHLYTLIVKSDNTYEVRIDGEKVESGELEQDWDFLPPKKIKDPEAKKPEDWDDNKKIDDPEDKKPEDWDKPQNIPDPDAKKPEDWDDEIDGEWEPPMIDNPEYKGEWKPKQIDNPNYKGEWVHPEIDNPDYSEDKDLYLYKDIGAVGFDLWQVKAGTIFDNVLVTDSVESSEEYAKEFEKTKEGEKKMKDKQDEEDRKKQEEEDKKKKEEEDSKKKEEEDEEDEEEAEDKKD…	CALR_MOUSE	Calreticulin	P14211	Mus musculus	Protein folding	Cytoplasm	Chaperone
21	25	Gelsolin-like protein 1 isoform X1 [Exaiptasia pallida]	XP_020908549.1	42 kDa	0.019	0.095822	0.044982	0.10867	0.19028	0.16091	0.15407	0.0786	0.0352	0.0596	0.127	0.127	0.127	2	1	2	5	4	4	2	1	2	4	4	4	(K)DSNLALFGSDLEK(N),(K)TVELDTFLDDKPVQHR(E),(K)GGADTGFNR(V)	(K)KDPNSEELSYDVHFWIGK(E),(K)DPNSEELSYDVHFWIGK(E),(K)ESTQDEYGTAAYK(T),(K)TVELDTFLDDKPVQHR€	c22668_g1_i1	MSGLRKAKKYDWKDSNLALFGSDLEKNIKKESAKGEPAWKNAGTKVGLQIWRIVNFKVVDWPKSKYGQFYDGDSYIILNTYKKDPSSDALSYDVHFWIGRYSTQDEYGTAAYKTVELDTLLDDKPVQHRQVMNHESDLFKSYFKEIIYLNGGADSGFNIETPESYKPRLLEFRKVDNKMYVTEKPLKKSSMSNGDVYLIDMGLTVIQWNGKESSPFERIEAQKLQQKLESDRNGKVKSEQLDEQDINNLDESLKNVIPDGDAPPDEEPPRGRQPFEKVLNRLSDSSGQLKFTEVSRGSGVKRSQLSSDDVFILETQTECFVWTGKGASIEERKKCMQYAHHYIQRSVNPFNPITVVKEGNESDNFNRAF	GELS1_LUMTE	Gelsolin-like protein 1	Q7JQD3	Lumbricus terrestris	Cellular component organization	Cytoskeleton	Actin binding
22	27	Gelsolin-like protein 1 [Orbicella faveolata]	XP_020605066.1	18 kDa	0.9	0.24297	0.10829	0.27555	0.28216	0.18859	0.18058	0.191	0.0855	0.204	0.191	0.191	0.191	1	1	2	1	1	1	1	1	2	1	1	1	(K)KDPSSEELDYDVHFWIGK(Y), (K)YSTQDEYGTAAYK(T), (K)TVELDTFLDDKPVQHRE	(K)YSTQDEYGTAAYK(T), (K)TVELDTFLDDKPVQHRE	c22668_g1_i1	MSGLRKAKKYDWKDSNLALFGSDLEKNIKKESAKGEPAWKNAGTKVGLQIWRIVNFKVVDWPKSKYGQFYDGDSYIILNTYKKDPSSDALSYDVHFWIGRYSTQDEYGTAAYKTVELDTLLDDKPVQHRQVMNHESDLFKSYFKEIIYLNGGADSGFNIETPESYKPRLLEFRKVDNKMYVTEKPLKKSSMSNGDVYLIDMGLTVIQWNGKESSPFERIEAQKLQQKLESDRNGKVKSEQLDEQDINNLDESLKNVIPDGDAPPDEEPPRGRQPFEKVLNRLSDSSGQLKFTEVSRGSGVKRSQLSSDDVFILETQTECFVWTGKGASIEERKKCMQYAHHYIQRSVNPFNPITVVKEGNESDNFNRAF	GELS1_LUMTE	Gelsolin-like protein 1	Q7JQD3	Lumbricus terrestris	Cellular component organization	Cytoskeleton	Actin binding
23	28	Spectrin alpha chain, non-erythrocytic 1-like [Exaiptasia pallida]	XP_020904938.1	279 kDa	0.61	0.049369	0.034009	0.023442	0.04531	0.027053	0.015362	0.0373	0.0327	0.0245	0.0431	0.0286	0.0137	7	5	3	9	5	3	6	5	3	9	5	3	(R)ITYINDLADQLAEEGHPDIELISLK(Q),(K)HQAFEAELNANR(N),(R)SAEQLEAWMATR(E),(R)NVDDEESWIK(E),(K)NTLVGSDDYGDTLAAVQGLLK(K),(K)TGYLDYQEFK(S)	(R)DADEVETWINEK(L),(K)EAIATVEELGR(D),(K)VTALGQEAGR(L),(R)LQEIHPENAEEISAK(Q),(R)EKEPIASSTNTGR(D),(K)DVASAEALIDR(H),(R)DSTFQAYDEFGR(E),(R)VADIESAGNK(L),(K)QEAFLADDNLGDSLDSVEALIK(K),(K)EHYASPDIQEK(L).	c32142_g1_i1	MTAVQAREIPILETVEDIQERREHVLRRYADFKDAARVRRRRLEDAKRYFQFKRDADEVEAWINEKLQIACDENYRDPTNLQDKLQKHQAFEAEISAHSYAITELQTTGEEMISESHYASELIRERLDSLIKLWELLLCKSAEKGRMLLFAQKRVHYLREVEEVMSWIHEKEAIATVEELGRDLEHVIVLQKKFDDFFKDLQANESRITYINDLADQLAEEGHPDIELISLKQREVNEAWERLKRLALLRKEKLESAQEIHNFYRDADETKNWINEKDKVLSSDDYGKDLASVNALLRKHEAMERDLAAVEDKVTALGQEAGRLQEIHPENADEVSAKHDEIVSAWGNLKDKSDVRKARLEDSYRLQRFIGDFRDHMSFINEMKVLIVSDELAKDVAGA…	SPTN1_HUMAN	Spectrin alpha chain, non-erythrocytic 1	Q13813	Homo sapiens	Cellular component organization	Cytoskeleton	Actin binding
24	29	Peroxiredoxin-2-like isoform X1 [Exaiptasia pallida]	XP_020917834.1	27 kDa	0.00083	0.15252	0.14882	0.17297	0.41405	0.35612	0.34098	0.0741	0.0741	0.0741	0.267	0.226	0.226	2	2	2	6	5	5	2	2	2	5	4	4	(R)GLFIIDDK(G),(R)LIQAFQFTDK(H).	(K)GGIGQINLPILSDLTK(Q), (R)DYGVLLEDAGVALR(G),(R)GLFIIDDK(G),(R)LIQAFQFTDK(H).	c23742_g1_i2	MAARLIGRLAPQLKQICTRNITLSKPQNAAPLYHFTRRMLSLSRAAEMSKAVIQKPAPPFAGTAVNKQGEFIDIKLSDYKGKYVVLFFYPLDFTFVCPTEIIAFSNRVEEFKAINCEVIACSVDSQYSHLAWTNVPRKKGGIGTINMPILSDLTKQISKDYGVLLEDQGVALRGLFIIDDKGILRQITVNDLPVGRSVDETLRLIQAFQFTDKHGEVCPAGWRPGSDTIVPEPGKSDKYFSKAN	PRDX4_BOVIN	Peroxiredoxin-4	Q9BGI2	Bos taurus	Cell redox homeostasis	Cytosol	Oxidoreductase activity
25	30	Superoxide dismutase [Cu-Zn]-like [Exaiptasia pallida]	XP_020895630.1	16 kDa	< 0.00010	0.12749	0.1244	0.14459	0.69263	0.76202	0.72964	0.0533	0.0533	0.0533	0.247	0.247	0.247	1	1	1	5	5	5	1	1	1	3	3	3	(K)TTGHAGGR(L)	(R)HVGDLGNIVAGADK(V),(R)SVVVHVGEDDLGR(G),(R)LACGVIGIAK(-).	unidentified	unidentified	SODC_HALRO	Superoxide dismutase [Cu-Zn]	P81926	Halocynthia roretzi	Cellular detoxification	Cytoplasm	Antioxidant activity
26	31	Chitotriosidase-1-like [Exaiptasia pallida]	XP_020909717.1	50 kDa	0.0077	0.22017	0.21483	0.24969	0.12019	0.13223	0.059273	0.115	0.115	0.115	0.13	0.13	0.0508	4	4	4	2	2	0	3	3	3	2	2	0	(K)TLLAVGGWNHENYNSPFSR(M),(R)LLLTAAVAAGK(A),(K)IALGLGTYGR(A),(R)ESGFLAYYEICK(M)	(K)ILDLINLMAYDLR(G),(K)IALGLGTYGR(A),(R)ESGFLAYYEICK(M),(K)GLAGAMFWAIPLDDFSGNFCGQGR(Y)	unidentified	unidentified	CHIT1_HUMAN	Chitotriosidase-1	Q13231	Homo sapiens	Metabolic process	Extracellular region	Chitinase activity
27	32	Vinculin-like [Exaiptasia pallida]	XP_020892500.1	97 kDa	0.87	0.061397	0.081241	0.12005	0.074686	0.082168	0.096039	0.053	0.053	0.0657	0.068	0.0714	0.0933	3	4	5	5	5	6	2	2	3	4	4	5	(K)TIESILDPVAQQVSQLVIFHEEGEDGR(A),(K)AVGAAVANLVK(V),(R)GILSGTSALLLTLDEAEVR(K).	(K)TIESILDPVAQQVSQLVIFHEEGEDGR(A),(R)AKDWIGDATCDASGLGEK(A),(K)KPATSFAGK(M),(K)MEQAQQWLQNPSGDHTGIGER(A),(R)NVQDLISPLAIEAK(S),(K)YMRDEEEGQPHSK(K)	c30299_g1_i1	MPVFHTKTIESILDPVAQQVSQLVIFHEEGEDGRAMPDLSTPIKAVGAAVANLVKVGQQTATNSKDKILRQEMPLAFTRVEESSTFLVEAAMILKNDPYSSVARKKLIDGARGILSGTSALLLTLDEAEVRRILHVCKSLLEYFPVAEMVEEMTDLVTFVTNLTPGTTSLAKQVEERAEELTHHEHRDILKSCIGKVKHLVPLLISAMKAFVKTPLGAGRAEAQENRNFIITKICAEITEIMRVLQLTSTEENKGDDPLYDMKKAMSVFDSKFDKAREWLGEPTCDAGGLGDQAVRECIQQGRDMASVCQDPQKNKIQRCCDDLDQLMSELETLRSQGKGTTPRGLELSREIDKQLGVLRNLMDEAIHHQGISGTKKPANTFVGKMEQVQQWLANPSGD…	VINC_DROME	Vinculin	O46037	Drosophila melanogaster	Cell adhesion	Membrane	Actin binding
28	34	Ribokinase-like [Exaiptasia pallida]	XP_020909259.1	34 kDa	0.0027	0.11792	0.11506	0.13373	0.30313	0.40916	0.31932	0.0708	0.0708	0.0708	0.215	0.24	0.215	2	2	2	6	7	6	1	1	1	5	6	5	(K)NANVTTVFNPAPASPWLDIQFYR(L)	(K)FSMGFGGK(G),(K)GANQCVMASR(L),(K)VGDDTFGR(N),(K)NANVTTVFNPAPASPWLDIQFYR(L),(R)LSDVFCANESEAELLTGVPVK(T),(K)AVVMLLER(G).	c28955_g1_i1	MAADKGPFDVVVVGSCMTDLVSYVPRLPKAGETITGTKFSMGFGGKGANQCVMASRLGAKTAMIAKVGDDTFGRNHIQNFKHNKVNVDNVSTTTQAFTGVAPISVNSSGENSITIVSGANEYLEDADIKRARSAIVSSAVVVCQLEIQPQITQLALALAKNANVTTVFNPAPASPWLDIQFYRLSDIFCANESEAELLTGIPVKSIDDAEKVVVMLLERGAGKVVITLGAKGSVIGTQENPIPQHIPVTPVEATDTTGAGDAFIGALAFYLAKFKNLSFQEMVRRSNEVARTTVFKRGTQTSFPTRDSLPPSFFSNTNSSDNKSIR	RBSK_MOUSE	Ribokinase	Q8R1Q9	Mus musculus	Phosphorylation	Cytoplasm	Kinase activity
29	35	Death-associated protein kinase 3-like [Exaiptasia pallida]	XP_020893050.1	38 kDa	0.17	0.10655	0.049816	0.18926	0.16401	0.18044	0.22576	0.0749	0.0419	0.0419	0.132	0.132	0.132	2	1	3	4	4	5	2	1	1	4	4	4	(R)ANEEDAAFVMR(Q),(K)IVHLDVRPANILVK(K)	(K)NMLEFLGEKPR(A),(R)ANEEDAAFVMR(Q),(K)IVHLDVRPANILVK(K),(K)LIDYGCAR(K)	c14394_g1_i1	MSNLAAKKFGPQTMELKKESPDNSYQIKAEVARGKYAVIKRCMDKKTKKNMMAKLIKYDSDTEKLAIQEFEIMRDLKNDKLLTARDGFHVRKYVIIMMDGVEAKNVLEFLGEKPRANEEDAAFVMRQTLDALKYLHGQKIVHLDVRPANILVKKDYTLKLIDYGCARRIKNDTGDLVDAIGVTEFAAPELLNVDPVCWAADMWSIGVMMYILLSATLPFTSEDEDEITQAVTAVDYEMPADKFGKATDEAKNLIKKCLVRVPEKRPTAVQVLEGDWLSNNNSQRRKTSDIPATKFKELNQALQDADKEEAVTASCTLRTFKEEEYESPDEDEE	DAPK3_RAT	Death-associated protein kinase 3	O88764	Rattus norvegicus	Apoptotic process	Cytoplasm	Kinase activity
30	36	Catenin alpha-2-like [Exaiptasia pallida]	XP_020911078.1	142 kDa	0.69	0.055777	0.026595	0.03091	0.071303	0.032099	0.030735	0.0341	0.0248	0.0155	0.0813	0.0325	0.0325	4	2	2	7	3	3	3	2	1	7	3	3	(R)VDEVVTAEMENYQK(G),(R)YWSSAEIRPR(Y),(R)YRGPAIVAQIIPTPAAQAGQIK(I),(R)GPAIVAQIIPTPAAQAGQIK(I)	(K)AVVDNISDAFLETNLPLLMMIEAAK(A),(R)NIHSLAPQVVNAAR(T),(K)VALENMAVFK(D),(R)VDEVVTAEMENYQK(G),(K)GSMAFAGCTGPTPR(Y),(R)YWSSAEIRPR(Y),(R)MVLMATQGTTGTAVNDAK(G)	c31918_g1_i1	MSRTAYQASGDVKLEHQKVKWDPKTLEIRTHSVEKALEPLVHQVTTLVNQPKKKGTRVGKSKNAHKLAQDIEDATVRLIKTGETIAQDFPEIRDEMLAACKDCRGAGDTMRFAAKEFADDPCSSSKRANMIRAARALLSAVTRLLCVADMADVYRLLASLKLVERRLKDLEGVNNTADLLNSFKSLGNDLMDLAKLSGKRQADLKDPLRRDEMAAARAKLKDASKMLLSSSKAYVRHPDVGSAKANRDFVIQQMNEAVRSISGTAQATGPSQPHPMEMPGALAAALDDFDSQLAMDPASYSEKRTRPSLEDRLEKIISGAAKLADSVCTRDHTRDNIIAECNAVRQALQNLLSEYMSHSSGKKKHAPGGPLDQAIENMCNKTRNLRGQLNKAVVDNISD…	CTNA2_PONAB	Catenin alpha-2	Q5R416	Pongo abelii	Cell adhesion	Cytoskeleton	Actin binding
31	37	Myosin-2 essential light chain-like [Exaiptasia pallida]	XP_020917237.1	19 kDa	0.27	0.36636	0.52073	0.41548	0.37651	0.41423	0.27228	0.227	0.227	0.227	0.233	0.273	0.163	3	4	3	4	4	3	3	3	3	4	4	3	(K)IDYDQIGDVLR(S),(R)SLGLNPTAGEVK(K),(R)VSFEEFLPIYHSAFQK(K)	(R)EAFSLFDR(K),(K)IDYDQIGDVLR(S),(R)SLGLNPTAGEVK(K),(R)VSFEEFLPIYHSAFQK(K)	c17273_g1_i1	MSTLSDDQIGEYREAFTLFDRKGDNKIDYDQIGDVLRSLGLNPTAGEVKKIEKDVGKKRVSFEEFLPIYHSAFQKKANPSLEEFIEGFRVFDRDGTGTVQAAELRNLLTTLGEKLSDEDVNTLFATVDDNSGYINYEDFVKVIITA	MLC2_DROME	Myosin-2 essential light chain	P54357	Drosophila melanogaster	Actin filament-based movement	Myosin complex	Metal ion binding
32	38	Ras-related Rab-2. predicted protein [Nematostella vectensis]	XP_001628750.1	24 kDa	0.0057	0.70665	0.86726	1.008	0.38591	0.13727	0.21135	0.245	0.307	0.382	0.245	0.127	0.132	6	7	7	5	2	3	5	6	6	4	2	2	(K)YIIIGDTGVGK(S),(R)FQPVHDLTIGVEFGAR(M),(K)LQIWDTAGQESFR(S),(R)GAAGALLVYDITR(R),(R)DTFNHLTTWLEDAR(Q),(K)TAANVEEAFINTAK€	(K)YIIIGDTGVGK(S),(K)LQIWDTAGQESFR(S),(R)DTFNHLTTWLEDAR(Q),(K)TAANVEEAFINTAK€	c19136_g1_i1	MSYAYLFKYIIIGDTGVGKSCLLLQFTDKRFQPVHDLTIGVEFGARMITIDGKQIKLQIWDTAGQESFRSITRSYYRGAAGALLVYDITRRDTFNHLTTWLEDARQHSSSNMVIMLIGNKSDLEARRDVKKEEGEAFAREHGLIFMETSAKTAANVEEAFINTAKEIYQKIQEGVFDINNEANGIKLGPQHSPSNPSVPLGGSRSQDSGGCC	RAB2_LYMST	Ras-related protein Rab-2	Q05975	Lymnaea stagnalis	Protein transport	Golgi apparatus	Nucleotide binding
33	39	Uncharacterized protein LOC110236688 [Exaiptasia pallida]	XP_020897889.1	56 kDa	0.0022	0.070402	0.033374	0.038789	0.16761	0.18441	0.14282	0.0372	0.0372	0.0372	0.0838	0.0838	0.0838	2	1	1	6	6	5	1	1	1	4	4	4	(K)VPATGTYSIEAAGASGGYDK(F)	(K)GKHECDSPSGFCK(D),(K)HECDSPSGFCK(D),(K)GQDHEGQVSVNK(G),(K)VPATGTYSIEAAGASGGYDK(F).	c28511_g1_i1	ISLHIWATSDTITMTRLILSLAFCCIVGFTQGFFLGGNDKDSIGIPVQIDKLGFRQDPKVYSHLVIPPWSRPFKPGYCMSWEWNTDKRYRDQRLAICQELTKGKHECDSPGGCRDKCPFSNGTYPYWRLRNAEDVPFLWVISSLQMYETPFSNKPLTSDPSRGYASSYFGPGYKPSNAFDNNQDTLWISNGAAPPGMQWIAFEFDRPVFVGSIRMALEEEKPERSPSMVYVEASCEKYFRNFVTMWVINNQRRESDKRYSVFGQAKFTTLGANGRLGPVSVGSNYKGQDHEGKVNVNKGVQMWKVPATGTYSIEAAGASGGYDKFSAGSGKFKGRGSRVKGNFKLKKGDVLKILVGQEGGNNPSSGGAGGGGGTFVVKEDNTPMIIAGGGGGVDKLKGE…	ALK_MOUSE	ALK tyrosine kinase receptor	P97793	Mus musculus	Phosphorylation	Membrane	Kinase activity
34	40	Calmodulin-like isoform X2 [Exaiptasia pallida]	XP_020915341.1	17 kDa	0.00054	0.11625	0.11343	0.13184	1.0536	1.1592	1.4163	0.112	0.112	0.112	0.625	0.618	0.638	1	1	1	7	7	8	1	1	1	7	7	8	(K)EADTDGDGTVNYEEFIK(M)	(K)LTEEEIAEFK(E),(K)EAFMVFDKDGDGTVTIQELGTVMR(N),(K)DVDKDGSGCIDFDEFLK(L),(K)GVSYEDELK(A),(K)QVLDNLGER(L),(R)LSEEEVGEMIK(E),(R)LSEEEVGEMIKEADTDGDGTVNYEEFIK(M),(K)EADTDGDGTVNYEEFIK(M).	c13463_g1_i1	MVDSLTEEEIAEYKDAFSLFDKDGDGTVTISELGTVMRNLGQNPTEEEIKEMIKDVDEDGSGCIDFNEFLELMAKKTKGTSYEDELKAAFKIFDADGNGSITVQELKQVLDNLGERLTEEEVGEMIKEADTDGDGTVNYEEFIKMMLAMSGGGK	CALM_HETTR	Calmodulin	A8I1Q0	Heterocapsa triquetra	Signal transduction	Unknown	Metal ion binding
35	42	Cytochrome c [Exaiptasia pallida]	XP_020906641.1	12 kDa	0.62	0.65048	0.36889	1.1339	0.70541	1.1239	0.7431	0.327	0.227	0.327	0.255	0.418	0.327	3	2	4	4	5	4	3	2	3	3	5	3	(K)TGPNLHGLFGR(K),(K)GITWGEDTLWIYLENPK(K),(R)ADLIAYLK(E).	(M)PEIPQGDATK(G),(K)TGPNLHGLFGR(K),(R)KTGQAPGFSYTSANQNK(G),(K)TGQAPGFSYTSANQNK(G),(K)GITWGEDTLWIYLENPKK(Y),(R)ADLIAYLK(E).	c25315_g1_i1	MSVPAGDATKGAKVFKQKCAQCHTVEKGGKHKTGPNLHGLFGRKTGQAHGFSYTTANQNKGITWGEDTLWIYLENPKKYIPGTKMVFAGLKKKTERADLIAYLKESTSS	CYC_PECGU	Cytochrome c	Q6QLW4	Pectinaria gouldii	Electron transport	Mitochondrion	Metal ion binding
36	44	Gelsolin-like protein 1 [Orbicella faveolata]	XP_020605062.1	24 kDa	0.035	0.2768	0.16824	0.31391	0.37435	0.41185	0.39435	0.0773	0.0773	0.0773	0.203	0.203	0.203	3	2	3	4	4	4	1	1	1	2	2	2	(K)TVELDTFLNDKPVQHR(E).	(K)DSNLSLFGSDLEK(N), (K)ESTQDEYGTAAYK(T), (K)TVELDTFLNDKPVQHR(E).	c10141_g1_i1	MSGLQKAKKYDWKDSNLALFGSDLEKNVKKESAKGEPAWEGAGTKVGLQVWRIVKFKVTHWPKEDYGKFFNGDSYIVLHTYKKDPDSEELSYDVHFWIGKRSSQDEYGTAAYKTVELDTFLNDKPVQHREVQNHESDLFKS	GELS1_LUMTE	Gelsolin-like protein 1	Q7JQD3	Lumbricus terrestris	Cellular component organization	Cytoskeleton	Actin binding
37	46	Radixin-like [Exaiptasia pallida]	XP_020900767.1	67 kDa	0.1	0.028693	0.057364	0.066671	0.13732	0.070136	0.091765	0.0159	0.0442	0.0442	0.106	0.0655	0.0814	1	2	2	6	3	4	1	2	2	6	3	4	(K)IAQDLEMYGVNYFDIK(N),(K)IGFPWSEIR(N)	(K)QLFDQVIK(T),(R)EIWFYGLSYEDEK(G),(K)IAQDLEMYGVNYFDIK(N),(K)KAPDFIFFTAR(L),(K)APDFIFFTAR(L),(R)RKPDTIEVQQMR(K).	c30582_g1_i3	MPKSINVKVTTVDAELEFAIQSSTTGKQLFDQVVKTIGIREIWYFGLQFTDSKGYTAWLKLNKKVTAQDVKKESPLQFRFLVKFYPEDVSEEIIQNITTKLFFLQVKEGILNDSIYCPAETSVLLASYACQGKYDDYDEDKAKNLLKDKLLAQRVLDQHKLSKEEWANKIATWWKEHGDLMPIEAMMEYLKIAQDLEMYGVNYFDIKNKKGTDLVLGVDALGLNVYEKTDKLTPKIGFPWSEIRNISFNDKKFVIKPIDKKAPDFVFFTERLRINKRILALCMGNHEMYMRRRKDDTIEVQQMKSQSKEERASTVAEREKTKEEKKKTERKARELEETLEKYKGLTAKLREQEEEMKALDEKHQQSLLQLQQEMEAKNSDRDRMMEENQTLLIKLQDSQ…	MOES_BOVIN	Moesin	Q2HJ49	Bos taurus	T cell proliferation	Cytoskeleton	Actin binding
38	47	Spectrin beta chain-like isoform X1 [Exaiptasia pallida]	XP_020898735.1	275 kDa	0.015	0.0069183	0.0067505	0.0078459	0.046059	0.027491	0.026322	0.0051	0.0051	0.0051	0.0472	0.0306	0.0336	1	1	1	9	5	5	1	1	1	8	5	5	(K)LILLLEILSGEK(L),(R)VHLENIGAHDIVDGNQK(I),(K)SIITYVSAYYHYFAK(M).	(K)HRPDLIDYEK(I),(K)DLDDFQVWLR(N),(R)LANEGHYAQDK(I),(R)GKDEASANDMLK(R),(R)SQDIGQDLAQVELLIEK(F),(R)VAATNALCDQLIGTGHSDAATIAEWK(D),(K)DGINESWANLLELIETR(K),(K)MGEELLAK(N).	c32124_g1_i2	MSVEIDVKHPLDRPSTDLLEVSRHRLEGLPTHMEDRDADVMRAFIDSMGTMGEVTADFSQVHGSEEEWMEQQSSARLFERSRIKVLADERERVQKKTFTKWINSHLQRVGARVNDLYHDLQDGRKLILLLEILSGEKLPKPSKGRMRIHNLENVEKCLVFLKKQRVHLENIGAHDIVDGNQKITLGLIWTIILRFQIQDIMIEGETKERRSAKDALLLWCQSKTVGYRNVTITNFTTSWRDGLAFNAIIHKHRPDLIEFEKINKVDAEQNLEQAFEVAETQLGITPLLDAEDVMVDFPDEKSIITYVSAYYHYFAKMKTVEVSGTRIGKVIERIKENEELINEYEKLATDLLEWIEMRIQTLADRDFANTLVGVQQQMLEFNQYRTQEKPPRFVEKGNL…	SPTB2_MOUSE	Spectrin beta chain, non-erythrocytic 1	Q62261	Mus musculus	Cellular component organization	Cytoskeleton	Actin binding
39	48	Peptidyl-prolyl cis-trans isomerase FKBP2-like [Exaiptasia pallida]	XP_020909341.1	16 kDa	0.022	0.12381	0.26712	0.14041	1.1677	0.52418	0.93967	0.104	0.201	0.104	0.59	0.438	0.535	1	2	1	7	4	6	1	2	1	7	4	5	(K)GWDQGLLNMCEGEK(R),(K)IPGGATLIFEVELLK(I)	(K)GDSLHMHYTGTLEDGTK(F),(K)FDSSVDRK(E),(R)KEPFXFTLGVGQVIK(G),(K)EPFXFTLGVGQVIK(G),(K)GWDQGLLNMCEGEK(R),(K)LVIPSDLGYGDSGAPPK(I),(K)IPGGATLIFEVELLK(I).	c36785_g1_i1	MRILTVSLIVVVLALFVLETQAEKKAKTKKLQIGIKKRVKDCKQKSAKGDSLHMHYTGKLEDGTEFDSSIPRGEPFIFTLGTGQVIKGWDQGLLNMCEGEKRKLVIPSDLGYGDRGAPPKIPGGATLIFEVELLKIVKQDKSDL	FKBP2_HUMAN	Peptidyl-prolyl cis-trans isomerase FKBP2	P26885	Homo sapiens	Protein peptidyl-prolyl isomerization	Endoplasmic reticulum	Isomerase activity
40	49	Thioredoxin domain-containing protein 3 homolog [Exaiptasia pallida]	XP_020901988.1	39 kDa	0.44	0.29347	0	0	0.20705	0.17456	0.16714	0.0977	0	0	0.115	0.0891	0.115	4	0	0	5	4	4	3	0	0	4	3	3	(R)TFIMVKPDGVQR(G),(R)GLVGEIIK(R),(R)VMLGETNPADSKPGTIR(G),(R)GDFCVHIGR(S).	(R)TFIMVKPDGVQR(G),(R)FMSSGPVVAMVWEGVGVVK(T),(R)GDYSIHIGR(N).	c23425_g1_i1	MALPSRLASQFRSSASLIRNGVTRRAFSSQSAGKSRSMFGNAAPFLIGATAATSTLLAAKYFYDNKHKYTVLQPVHAAARIVNKSERTFIMVKPDGVQQGLVGEIIKRFEQKGFKLVAMKFVHANEDHLRKHYEDLKALPFFPGLVKFMSSGPVVAMVWEGNGVVKTGRVMLGETNPADSKPGTIRGDFCVHIGRNIIHGSDSVESANKEIDLWFDKKELVDWKPNYYKFVYEDEN	NDK_CHICK	Nucleoside diphosphate kinase	O57535	Gallus gallus	Apoptotic process	Cytoplasm	Kinase activity
41	50	Acidic mammalian chitinase-like [Exaiptasia pallida]	XP_020902061.1	47 kDa	0.0068	0.18112	0.28462	0.2054	0.059599	0.06557	0.062783	0.0703	0.096	0.0703	0.0328	0.0328	0.0328	4	6	4	2	2	2	3	4	3	2	2	2	(R)VCYFTNWAQYR(D),(K)YGFDGLDLDWEYPAHR(G),(R)FTVLCQELLDAFK(R),(R)FTVLCQELLDAFKR(H).	(R)FTVLCQELLDAFK(R),(R)FTVLCQELLDAFKR(H).	unidentified	unidentified	CHIT1_HUMAN	Chitotriosidase-1	Q13231	Homo sapiens	Metabolic process	Extracellular region	Chitinase activity
42	51	Peptidyl-prolyl cis-rans isomerase B-like.predicted protein [Nematostella vectensis]	XP_001626713.1	22 kDa	0.033	0.44307	0.30049	0.34925	0.21727	0.23903	0.22888	0.118	0.118	0.118	0.158	0.158	0.158	4	3	3	1	1	1	2	2	2	1	1	1	(R)IEIGLFGK(A),(K)LQHYGAGWLSMANAGK(D)	(K)FTVLCQELLDAFK(R).	c10977_g1_i1	ILFTSSEQISRNSFLQNPVQNMNFLAFLSVFTLFVVAVNASKDVLVTKKVFFDITIGGKKAGRIEIGLFGKTVPKTAKNFFELATHEKGFGYKGSTFHRVIKDFMIQGGDFTNGDGTGGKSIYGEKFADENFKLQHYGAGWLSMANAGKDTNGSQFFITTTKTPWLDGRHVVFGKVVSGMDVVRKIENSKTNHSDKPTSEVKIADSGSLPVDKPFEVTMDDAQ	PPIB_CHICK	Peptidyl-prolyl cis-trans isomerase B	P24367	Gallus gallus	Protein folding	Endoplasmic reticulum	Isomerase activity
43	54	Ras-related protein Rab1A. predicted protein [Nematostella vectensis]	XP_001632230.1	23 kDa	0.024	0.18544	0.18094	0.097938	0.30303	0.44951	0.55798	0.107	0.107	0.0537	0.224	0.327	0.41	2	2	1	4	5	6	2	2	1	4	5	6	(K)LLLIGDSGVGK(S),(K)LQIWDTAGQER(F).	(K)LLLIGDSGVGK(S),(K)LQIWDTAGQER(F),(R)GAHGIIVVYDVTDQESFNNVK(Q),(R)YACENVNK(L),(K)EYAESLGVPFLETSAK(N),(K)NATNVEQAFMTMAAEIK(N).	c23411_g1_i1	MSTMNPEYDYLFKLLLIGDSGVGKSCLLLRFADDTYTESYISTIGVDFKIRTIELDGKTIKLQIWDTAGQERFRTITSSYYRGAHGIIVVYDVTDQESFNNVKQWLQEIDRYACENVNKLLVGNKCDLTTKKVVDFTTAKEYAESLGVPFLETSAKNATNVEQAFMTMAAEIKNRMGPSPSAQGPGSNVKINSSSPVKPSSGGCC	RAB1A_LYMST	Ras-related protein Rab-1A	Q05974	Lymnaea stagnalis	Protein transport	Golgi apparatus	Nucleotide binding
44	55	Programmed cell death 6-interacting protein-like [Exaiptasia pallida]	XP_020896864.1	93 kDa	0.1	0.11079	0.08496	0.072763	0.078163	0.032623	0.047685	0.0455	0.0455	0.0359	0.0611	0.0263	0.0587	5	4	3	4	2	3	3	3	2	4	2	3	(R)GGVATIDTLMQDLPELLQR(N),(K)FYNDLTPILLR(F),(K)ISDLVFAR(K).	(K)NTFSEEILNENADAIADLNK(L),(R)ISFTWYDAFDK(G),(K)GLYGENVAR(M),(K)FYNDLTPILLR(F).	c29983_g1_i1	MAGWIVIPSKRTEAVDFKKPLEKFIKNTFSEEVLNENSDAIAELNKLRNTAVMQVPDKHEAALQPLLRYYDQLVAMEGKLPISESQIRVSFSWYDAFDKGSLFGSKKASISSSAYERLCLLYNIGALQSQIASSQNLHSEDGIKLAAKLFQNASGCFQMLKDSVFPQLHQVPTPDMSIEMLNALSSVMLAQGQEAIWHKTEKDNMKSAVIAKVAAQTSDLYREANQACQVSSVRQQLEKEWIAVLGAKQNYFLAIANYHQGLVAKDKGAYGENVARMKLAKDLSESAQKESLGLFETKAWLDRIKRTHAEADKDNNLIYHDMIPSNDKMAVIGRAALAKQLPLSKPASDNFMDMFPKLVPMAVHNALVAYESRKAEIINMEVGRLREGTQLINSVLASL…	PDC6I_XENLA	Programmed cell death 6-interacting protein	Q9W6C5	Xenopus laevis	Protein transport	Extracellular region	Unknown
45	56	Neurocalcin homolog [Exaiptasia pallida]	XP_020893734.1	22 kDa	0.27	0.19163	0.30228	0.21733	0.69933	0.24046	0.33139	0.109	0.176	0.124	0.378	0.176	0.259	2	3	2	7	3	4	2	3	2	7	3	4	(K)LKPEELADLR(N),(K)IYGNFFPYGDASK(F),(K)LSLAEFIEGAK(S).	(R)NATQFNEQELQEWYK(G),(K)IYGNFFPYGDASK(F),(R)EFICALSVTSR(G),(R)QEMLEIVTAIYK(M),(K)MPEDESTPEK(R),(K)MPEDESTPEKR(T),(K)LSLAEFIEGAK(S).	c21860_g1_i1	MGKQNSKLKPEELADLRNATQFNEQELQEWYKGFLKDCPSGHLSVEEFKKIYGNFFPYGDASKFAEHVFRTFDQNGDGTIDFREFICALSVTSRGKLEQKLKWAFNMYDLDGNGYISRQEMLEIVKAIYKMVGSVMKMPEDESTPEKRTDKIFRQMDKNVDGKLSLAEFIEGAKSDPSIVRLLQCDQSAGAAQ	NECX_APLCA	Neurocalcin	Q16982	Aplysia californica	Unknown	Unknown	Metal ion binding
46	57	Triosephosphate isomerase-like [Exaiptasia pallida]	XP_020915468.1	27 kDa	0.0012	0.072159	0.07041	0.081834	0.10808	0.11891	0.11386	0.0607	0.0607	0.0607	0.121	0.101	0.121	1	1	1	2	2	2	1	1	1	2	2	2	(K)VVIAYEPVWAIGTGK(T)	(K)VVIAYEPVWAIGTGK(T),(K)TATPQQAQEVHQQLR(G),(R)IIYGGSVNAK(N)	c13561_g1_i1	SILALLPRSFPSCSADRISRFSLCFLFLSFLLQKPRNKIMGRKFFVGGNWKMNGSKAKIDEILKNLHDSSLSAETEVVISPPALYLSYVRSSAKPEIGVAAQNCYKVASGAFTGEISPEMVKDLSCEWVILGHSERRNVFGENDELIGEKVSHALANDVKVIACIGELLAEREAGKTTEVVFRQIKAIADKVSDWSKVVIAYEPVWAIGTGKTATPQQAQEVHHQLRDWVKKNVSAVVAEGIRIIYGGSVNAKNCRELGAEPDIDGFLVGGASLKPEFVQIVNARL	TPIS_CULTA	Triosephosphate isomerase	P30741	Culex tarsalis	Metabolic process	Unknown	Isomerase activity
47	58	Peptidyl-prolyl cis-trans isomerase B-like [Exaiptasia pallida]	XP_020904785.1	24 kDa	0.0017	0	0	0.090623	0.36991	0.30357	0.29067	0	0	0.0357	0.246	0.21	0.21	0	0	1	5	4	4	0	0	1	5	4	4	(R)IVIGLFGK(S)	(K)VFFDITIGGEK(S),(R)IVIGLFGK(S),(K)HYGPGYLSMANAGK(D),(K)DTNGSQFFITTVK(T),(K)ILEGMDVVR(K)	c18453_g1_i1	MVSRRMLPTGSLLKIMKALTVAGIVVGVIVFLLRPNESVAKTKKGPLVTSKVFFDIEIGKKPAGRIVIGLFGKTVPKTARNFEVLATGEKGFGYKGSLFHRVIKDFMIQGGDFVNKDGTGGRSIYGDRFDDENFKLKHYAAGYLSMANAGKDTNGSQFFITAVKTSWLDGKHVVFGKVLEGMGVVRKIENTALSGSKPVKDCTIVDSGTLPVDKPFNIEKE	PPIB_RAT	Peptidyl-prolyl cis-trans isomerase B	P24368	Rattus norvegicus	Protein folding	Endoplasmic reticulum	Isomerase activity
48	59	Polyubiquitin C. predicted protein [Nematostella vectensis]	XP_001624503.1	26 kDa	0.45	0.25756	0.1572	0.1827	0.18171	0.19992	0.11973	0.148	0.109	0.109	0.135	0.166	0.0786	3	2	2	3	3	2	3	2	2	3	3	2	(K)TITLEVEPSDTIENVK(A),(R)TLSDYNIQK(E),(K)ESTLHLVLR(L)	(K)TITLEVEPSDTIENVK(A),(K)IQDKEGIPPDQQR(L),(K)ESTLHLVLR(L)	c11211_g1_i1	MQIFVKTLTGKTITLEVEPSDTIENVKTKIQDKEGIPPDQQRLIFAGKQLEDGRTLSDYNIQKESTLHLVLRLRGGVIEPSLRLLAQKYNCEKMICRKCYARLHPRATNCRKKKCGHSNNLRPKKKLK	RL40_DROME	Ubiquitin-60S ribosomal protein L40	P18101	Drosophila melanogaster	Translation	Ribosome	Structural constituent of ribosome
49	60	Myosin heavy chain, striated muscle-like isoform X1 [Exaiptasia pallida]	XP_020901361.1	223 kDa	0.12	0.017203	0.016786	0.0096842	0.02463	0.041245	0.019318	0.017	0.017	0.0129	0.0216	0.0345	0.0216	2	2	1	4	6	3	2	2	1	4	5	3	(R)IGISVIQR(N),(R)LEMEKEELQTAVEEAEGALEAEEGK(V).	(R)IGISVIQR(N),(K)DKNIEQLNEELQQQDEAIAK(V),(K)NIEQLNEELQQQDEAIAK(V),(K)NLEADYDTLQENFEELEDGKADMQK(Q),(R)LNSELEDAIIDLEK(A),(K)GTNDELNELLESLKR(E).	c28414_g1_i2	MDIDPNDPVAMLRIDKKSMMAANKEFETKKWVWVTDEKEGYKAAEIKSTKGDKLMVETNDGKEMEVKKDDTEQMNPPKYEKTEDMANLTYLNEASVIHNLKQRYYGGLIYTYSGLFCVAINPYRRLPIYSEAIVFAYRGKRKTEMPPHIFSICDNAYQNMLQDRENQSMLITGESGAGKTENTKKVIQYLAHVSGGMSKADKEHKEKTGGSLEDQVIQTNPILEAYGNAKTIRNNNSSRFGKFIRCHFGPQGKLAGADIESYLLEKSRVVYQQEGERNYHIFYQILKGATKELLDDLLIESSRKDDYPFLERGSEIAEGIDDVEEFHITELAADTLGFTADEKKSMYKICASCLHWGNAKFKQRPREEQAEVSDAKDLDKVSFLMKLPGADFIKNIIKP…	MYS_ARGIR	Myosin heavy chain, striated muscle	P24733	Argopecten irradians	Unknown	Cytoplasm	Actin binding
50	61	Adenylate kinase-like [Exaiptasia pallida]	XP_020916906.1	29 kDa	0.053	0.067598	0.065959	0	0.30014	0.52172	0.16876	0.0496	0.0496	0	0.16	0.191	0.107	1	1	0	5	6	3	1	1	0	4	5	2	(R)YCVCHLATGDMLR(A)	(R)YCVCHLATGDMLR(A),(K)TLLDAVVEFAIDDSLLVK(R),(R)SDDNEATLTK(R),(K)AFEAAHAR(F).	c23200_g1_i1	MAPPIPQRGTVFKTEPGADAKGKAELEEMVKKAEACERGVRAILLGPPGSGKGTQAPKLAERYCVCHLATGDMLRAVVASGSALGKKVKAVMDSGALVSDDLVVELIDDNLNKPECQNGWLLDGFPRTVTQAEKLDGLLEKRKSLLDAVVEFAIEDSLLVKRITGRLLHKPSGRTYHTEFNPPKAHMKDDLTGEPLERRSDDNEATLGKRLQAYHAQTAPLVHYYTRRGIHHKIDASKPPNLVTEEVLKAFEAAHARFGKST	KAD2_DANRE	Adenylate kinase 2, mitochondrial	Q1L8L9	Danio rerio	Phosphorylation	Mitochondrion	Kinase activity
51	63	Golgi reassembly-stacking protein 2-like [Exaiptasia pallida]	XP_020893232.1	50 kDa	0.74	0.038605	0.12061	0.090446	0.087208	0.095944	0.091867	0.0441	0.111	0.0861	0.103	0.103	0.103	1	3	2	3	3	3	1	3	2	2	2	2	(M)GAGSSTEIPGGGSEGYHVLR(V),(R)EVSITPSNMWGGQGLLGVSIR(F),(K)LYVYNSETDGCR(E).	(K)AGLEPFFDFIVSIENTR(L),(R)TNTDYIIGADSVLHESDDLFQLIESHEGKPLK(L).	c22821_g1_i1	MGAGSSTEIPGGGSEGYHVLRVQENSPGYKAGLEPFFDFIVAIENTRLDQDNETLKEILKSNAEKPVKMLVYSSKTLKVREVSITPSNMWGGQGLLGVSIRFCSFDGANENVWHVLDVQPNSPADIAGLRSNTDYIIGADSVLHESDDLFQLIESHEGKALKLYVYNSETDGCREVTLTPNSNWGGEGSLGCGIGYGYLHRIPQKEEDSLPPVSSSPAAPSSDGFSEVPLVGITTAATTPQQTVLDQGMASLNLESSTANAAMNPLNTSLTMPSTVESASIINPTTQPTPAPVPLYQSPPLIPTLVGETPTKSEVSTPPVPSAVPLYNTPLMSASTPPQVYPAPAAPGVQAPYTANSFPITSPVNPYSIPTQSTATPDLKYSTPSGSSTVTATPSQLLT…	GORS2_HUMAN	Golgi reassembly-stacking protein 2	Q9H8Y8	Homo sapiens	Organelle organization	Golgi apparatus	Protein binding
52	64	Ubiquitin-conjugating enzyme E2 L3-like [Exaiptasia pallida]	XP_020893608.1	18 kDa	< 0.00010	0.11244	0.10971	0.12752	0.4208	0.46295	0.44328	0.098	0.098	0.098	0.301	0.301	0.418	1	1	1	4	4	4	1	1	1	3	3	4	(K)IEIVFPAEYPFKPPK(I)	(K)IEIVFPAEYPFKPPK(I),(K)GQVCLPIISPENWKPATK(T),(K)TDQVIQALVALIHDPEPEHPLR(A),(R)ADIAEEYTK(D)	c17550_g1_i1	MAATRRLTKELKDIRASNLKIFQSLEVDETNILYWQGLIVPDAQPYNKGAFRIEIVFPAEYPFKPPKITFKTKIYHPNIDEKGQVCLPIISPENWKPATKTDQVIQALVVLVENPEPEHPLRGDLAEEYTKDKKKFMKNAEDFTKKHSESRPK	UB2L3_MOUSE	Ubiquitin-conjugating enzyme E2 L3	P68037	Mus musculus	Protein ubiquitination	Nucleus	Transferase activity
53	66	AP-1 complex subunit beta-1-like [Exaiptasia pallida]	XP_020909636.1	104 kDa	0.7	0.037511	0.036602	0.042541	0.084581	0.044365	0.013723	0.0276	0.0276	0.0276	0.0776	0.0414	0.0128	2	2	2	6	3	1	2	2	2	6	3	1	(R)TVEGQDMLYQSLK(F),(K)MIPGNPTVQLSLK(T).	(K)GLEVSGTFSR(R),(K)AMQAMDGLAIQLNK(N),(R)MDPLTNIQIAFK(N),(K)LQANNIFTIAK(R),(R)TVEGQDMLYQSLK(F),(K)MIPGNPTVQLSLK(T).	c30283_g1_i1	MTDSKYFTTTKKGEIFELKAELNSDKKDRKKEAVKKVIASMTVGKDVSSLFPDVVNCMQTDNLELKKLVYLYLMNYAKSQPDMAIMAVNTFVKDCEDPNPLIRALAVRTMGCIRVDKITEYLCEPLRKCLKDEDPYVRKTAAVCVAKLHDINSQLVEDQGFLDSLKELLSDANPMVVANAVAALSEINDSSPTAAAMMDMDSQTINKLLTALNECTEWGQIFILDSLAQYTPKDEREAQSICERVTPRLSHANAAVVLSAIKVLMKYMEMMTPSSGFVQSVLKKLAPPLVTLLSSEAEVQYVALRNINLIVQKRPEILKNEMKVFFVKYNDPIYVKLEKLDIMIRLASETNIAQVLAELKEYATEVDVDFVRKSVRAIGRCAIKVEPSAERCVSTLLDL…	AP1B1_HUMAN	AP-1 complex subunit beta-1	Q10567	Homo sapiens	Protein transport	Golgi apparatus	Protein binding
54	67	Actin, cytoplasmic-like [Orbicella faveolata]	XP_020600465.1	28 kDa	0.024	2.5216	3.2156	2.4888	1.5483	1.9572	1.874	0.601	0.7	0.581	0.542	0.549	0.581	0	3	3	2	2	2	0	2	2	1	1	1	(-)mFETFNSPAmYVAIQAVLSLYASGR(T), (M)FETFNSPAmYVAIQAVLSLYASGR(T), (R)TTGIVFDSGDGVSHTVPIYEGYALPHAILR(L), (R)DLTDYLmK(I), (R)GYSFTTTAER(E), (K)LcYVALDFEQEMQTAASSSSLEK(S), (K)SYELPDGQVITIGNER(F), (R)cPEAmFQPSFLGmESAGIHETTYNSImK(C), (R)KYSVWIGGSILASLSTFQQmWISK(Q), (K)YSVWIGGSILASLSTFQQmWISK(Q), (K)QEYDESGPSIVHR(K).	(M)FETFNSPAmYVAIQAVLSLYASGR(T), (R)TTGIVFDSGDGVSHTVPIYEGYALPHAILR(L), (R)DLTDYLmK(I), (R)GYSFTTTAER(E), (K)SYELPDGQVITIGNER(F), (R)KYSVWIGGSILASLSTFQQmWISK(Q), (K)YSVWIGGSILASLSTFQQmWISK(Q), (K)QEYDESGPSIVHR(K).	c30882_g1_i1	MEDEVAALVVDNGSGMCKAGFAGDDAPRAVFPSIVGRPRHQGVMVGMGQKDSYVGDEAQSKRGILSLKYPIEHGIVTNWDDMEKIWHHTFYNELRVAPEEHPVLLTEAPLNPKANREKMTQIMFETFNSPAMYVAIQAVLSLYASGRTTGIVFDSGDGVSHTVPIYEGYALPHAILRLDLAGRDLTDYLMKILTERGYSFTTTAEREIVRDIKEKLCYVALDFEQEMQTAASSSTLEKSYELPDGQVITIGNERFRCPESLFQPAFLGMESAGIHETCYNSIMKCDVDIRKDLYANTVLSGGSTMYPGIADRMQKEIANLAPPTMKIKIIAPPERKYSVWIGGSILASLSTFQQMWISKQEYDESGPSIVHRKCF	ACTA_STRPU	Actin, cytoskeletal 1A	P53472	Strongylocentrotus purpuratus	Unknown	Cytoskeleton	Nucleotide binding
55	68	PDZ and LIM domain protein 7-like isoform X2 [Exaiptasia pallida]	XP_020893814.1	63 kDa	0.013	0.030592	0.029851	0.034694	0.068187	0.04873	0.07183	0.0174	0.0174	0.0174	0.0626	0.0452	0.0626	1	1	1	3	2	3	1	1	1	3	2	3	(R)LEGGGPWGFR(L)	(R)LEGGGPWGFR(L),(R)EGDTIVSINYEDTR(N),(K)NTGNTLDLSVLR(G).	c26413_g1_i1	MTMAEPEINIRLEGGGPWGFRLTGGKDFGSRLTVSKITPGGKASYNGLREHDQIFSINYEDTRNMTHMDAQEAIKQAGSTLDLSIRRGDSPKIGRGPLTMTETVHSGKVDHKYNAVPKPFGAPSFQPSRQTQPQPSGAQPAPTIRSGPPATAPKPSSPMAPAYSHYTGGPPRSNVPPPGRDYIDNDAAMRAKKKEIEDEMLSQRFKLSISDDGEVNYDEASQVPNWGHPPDPNVQSKSFKMLQRHLQQHEDDDLPPPPPEAYDDQDEEKVQSKSFQMLRSAVDSGESPPSVFNRDRGDRSKPSTTPMPNRPTVPITKSTPEPYAPPPMSRPGQTPPVALPGMARQEPSGQSSQPKIRTQRPQAPSYQHPSHPPSAPQPPRGPPQGGGHQHEIKRQPIKP…	ZASP_DROME	PDZ and LIM domain protein Zasp	A1ZA47	Drosophila melanogaster	Regulation of cell-matrix adhesion	Cytoskeleton	Actin binding
56	71	LOW QUALITY PROTEIN: talin-2-like [Exaiptasia pallida]	XP_020909070.1	267 kDa	0.097	0.021611	0.021087	0.01624	0.015247	0.016775	0.010643	0.0157	0.0157	0.00964	0.0125	0.0125	0.00844	3	3	2	3	3	2	3	3	2	3	3	2	(K)TLQFNPEATVAEALR(I),(K)TYGVTFFLVK(E),(K)ISQLIAGYIDIILK(K).	(K)LGGLDELQRG(Y),(K)TYGVTFFLVK(E),(K)DISNLYDDIAK(N).	c32098_g1_i1	MALSLKIQVVKNNSVKTLQFNPEATVAEALRIIRDKVPDASPGKAADYGLFLPSDDLAKGKWLEPARSLNFYPLKNGDSVEYKTKIRLIKIKFMDNNVKTLQIDDSHTAGQILETICAKMGISNPEEFSLLVEGKEEEKDEAEKTSTIRRDKSMKDVPIKRMEERDRKKMEQLKKKLHTEDDVRWLDHDKTLRELGVSDTDTVVMRRKYFYSDQNVDIKDPVQLNLLYVQCRDGIIDGTHPCTIEEASQLGAIQIQVQFGDFDEGKYKLIDLKEFLPKEYVKTKSVDKKIKEEHRKLSGLDELQARYRYVQLCRGLKTYGVTFFLVKEKMKGKNKLVPRLLGITKESILRVDERTKEVMKTWPLTTVRRWAASPNSFTLDFGDYTESYYSVQTNEGEKI…	TLN2_HUMAN	Talin-2	Q9Y4G6	Homo sapiens	Cell adhesion	Plasma membrane	Protein binding
57	72	14-3-3 protein epsilon-like [Exaiptasia pallida]	XP_020916667.1	29 kDa	0.025	0.22219	0.13667	0.15885	0.098822	0.051453	0.049266	0.0703	0.0703	0.0703	0.0625	0.0312	0.0312	3	2	2	2	1	1	2	2	2	2	1	1	(R)NLLSVAYK(N),(K)DSTLIMQLLR(D)	(R)NLLSVAYK(N),(K)DILDLLEK(H)	c12347_g1_i1	MADRDDNIYMAKLAEQAERYDEMVAAMKNIALLNVDLTTEERNLLSVAYKNVIGARRASWRIISSIEQKEKSKGEDNPKLGMIVEYRLQIEKELNDICEEILDLLTNHLIESAASDESKVFYYKMKGDYYRYVAEFTKNDPKSEKLAADNSMEAYDEAQKIAVEKLGKTNPIRLGLALNYSVFYYEIQNDPQKACKLAKQAFDNAISELDKLSEDSYKDSTLIMQLLRDNLTLWTADHPSEEADRGESTVLQDVGNEDET	1433_DICDI	14-3-3-like protein	P54632	Dictyostelium discoideum	Unknown	Cytosol	Unknown
58	74	Gelsolin-like protein 1, partial [Exaiptasia pallida]	XP_020894746.1	28 kDa	0.006	0.2301	0.22452	0.26095	0.16234	0.11239	0.10761	0.0645	0.0645	0.0645	0.109	0.109	0.109	3	3	3	3	2	2	1	1	1	2	2	2	(K)TVELDTLLDDKPVQHR(Q)	(K)TVELDTLLDDKPVQHR(Q),(R)QVQGFETDLFK(S)	c29531_g1_i1	HRFLLGVHTLLQDFKESRKVKEFENLKMSGLVKAKEYDLEDSNVENIGSDMDKYVRKEAAQTEEAWIGAGQKVGIQIWRIEDFKVVAWPKSKYGQFYGGDSYIILRTYKEHESEELQYDLHFWIGKESTQDEMGTAAYKTVELDTLLDDKPVQYREVESHESRMFKEYFKRITHLEGGVASGFNHVETNSDLPPPCIFELCGETDMDIEYSQVTKATWNSLHSYSAFVIIVGRNIIRFLGSKSNKNEKYGLAVFLNDFKSDYPRLREIGCIDGDDELNRKVALYQKKKEKKDEDGEDDNDDDD	GELS1_LUMTE	Gelsolin-like protein 1	Q7JQD3	Lumbricus terrestris	Cellular component organization	Cytoplasm	Actin binding
59	78	Protein CutA homolog [Exaiptasia pallida]	XP_020892660.1	17 kDa	0.033	0.26135	0.25501	0.29639	0.30542	0.33602	0.32174	0.089	0.089	0.089	0.178	0.24	0.24	2	2	2	3	3	3	1	1	1	2	3	3	(K)NHPYDVPEVISFK(I)	(R)IPDVTDYIK(K),(K)NHPYDVPEVISFK(I),(K)IDQGNPGYLDFVR(T).	c25877_g1_i1	MRFLSRGLNVCKTLLHISSKNTKMAQEFSSGVFSTAFITCPNLETAKALARGMVEQNLAACVNVIPNITSIYTWENKLEEDSEVLLIVKTRSSRVPGISDYIKKNHPYDVPEVISFKIDQGMPSYLDFLNTKTAEKKVE	CUTA_XENLA	Protein CutA homolog	Q66KY3	Xenopus laevis	Response to metal ion	Unknown	Unknown
60	79	Alpha-adducin-like [Exaiptasia pallida]	XP_020895547.1	69 kDa	0.62	0.05712	0.02722	0.031637	0.084524	0.044337	0.020733	0.0179	0.0179	0.0179	0.0798	0.0619	0.044	2	1	1	4	2	1	1	1	1	3	2	1	(R)GSDTLNYSK(Q),(R)AMAAGVDNLLK(I).	(R)TSPEDEHFLLNPFGLLYSEVTASSLIK(V),(R)AMAAGVDNLLK(I),(R)NPDVFVGDKPK(A)	c30609_g1_i1	MSASKTGRAITDMKARRLSAPARSKAVKRPEDIVRDVRGLKLRQRVSLVLNDKVLREELEDIVENFVHNGPKHTENIRAYQDFLIPSYGGAGGGCVVTPIADIRGSDTLNYSKQERLLRCKLASVYRLVDIFGWSTGIYGHITARTSNEEGHYLVNPFGLLYSEITASSLVKVDHGVNVIDGGSTSLGVSKAALVLHSAIHEARKDIKCVVHLHQSDCVAVAATEFGLLPISIEGSVLGEIAYHNYEGILLDDEEKQAIVRDMGDTSKVMVLRNHGIVCCGETVEEAFDLAFWTVKACEQQVRAMAAGVDNLLKIDEQARKHDVNAHKNFSTNMSKTQWKAGELQFEAYMRMLDSRGYRTGHLYKNPDVFVGDKPSAREVTSPATTTSTRAQLFFTPEY…	ADDA_HUMAN	Alpha-adducin	P35611	Homo sapiens	Cellular component organization	Cytoskeleton	Protein binding
61	80	Sorting nexin-6-like [Exaiptasia pallida]	XP_020891895.1	46 kDa	0.6	0.041816	0.084513	0.047422	0.13124	0.032457	0.064371	0.0274	0.0348	0.0348	0.0846	0.0199	0.0522	1	2	1	4	1	2	1	1	1	4	1	2	(K)MKQELEAEYLATFK(K),(K)TVAMHEVFLTR(I).	(K)ESEFSVV(E),(R)EHEEFVWLHDR(L),(K)LGEGENTMTK(E),(K)LGEGENTMTKEEFQK(M),(K)TVAMHEVFLTR(I).	c29834_g1_i1	MDAADSSDMLEDEKSRTQSVDLSTDTSLVVDISDALSERDRVKFTVHTKTTLPDFKESDFSVVREHEEFIWLHDRLVENEEYAGIIIPPAPPKPDFDVSREKLQKLGEGENTMTKEEFQKMKQELEAEYLATFKKTVAMHEVFLTRIASHPSLRKDSNFKVFLEYKGELNVRGKNKKEKLGGLFKGLAKGVDEVLLSSQKDVDEFFESEKKFLVEYHNKLKDSTRKGDQMTRSHKNCADTFIKISTGVAAMGTSEYTGLDKFLNKAADYFERARKLEGRVASDEDLKLVDLLRYYLRDTEAAKDLLYRRAKCLSEYENANKTLDKARLKNKEVAAAESAQQNASEKFDHMSEVARQELTDFKARRVQQFRKNLTELVELELKHAKAHNQLLKNTLAALK…	SNX6_MOUSE	Sorting nexin-6	Q6P8X1	Mus musculus	Protein transport	Endosome	Protein binding
62	81	F-actin-capping protein subunit beta-like isoform X1 [Exaiptasia pallida]	XP_020898439.1	32 kDa	0.24	0	0.12401	0.14414	0.19877	0.098652	0.20939	0	0.14	0.14	0.204	0.0842	0.249	0	2	2	4	2	4	0	2	2	4	2	4	(R)LEIDANSAFDQYR(E),(R)EMYFEGGVSSVYLWDLDHGFAGVILIK(K),(K)LTSTAMLWLQTNK(A),(R)NTLNEIYFGK(T).	(K)NLSDLIDLVPSLCEDLLSSVDQPLK(I),(R)SPWSNTYDPPLDDGAVPSDR(L),(R)KLEIDANSAFDQYR(E),(K)AGSGIMNLGGSLTR(Q),(R)NTLNEIYFGK(T).	c31719_g2_i1	MTDRQLDCALDLMRRLPPQQIEKNLSDLIDLAPELCEDLLSSVDQPLKIAKDKETGKDYLLCDYNRDGDSYRSPWSNTYEPALDDGAVPSDRLRKLEIDANSAFDQYREMYFEGGVSSVYLWDLDHGFAGVILIKKAGDGSKKIKGCWDSIHVVEVQEKSSGRQAHYKLTSTAMLWLQTNKTGSGIMNLGGSLTRQIEIDSSVNDANPHIANIGKMVEEMENKMRNTLNEIYFGKTRDIVHSLRSVNSIQDQSKQKAMQAELFQTLKSRQK	CAPZB_CHICK	F-actin-capping protein subunit beta isoforms 1 and 2	P14315	Gallus gallus	Cell morphogenesis	Cytoskeleton	Actin binding
63	89	Catenin delta 2. uncharacterized protein LOC110246590 [Exaiptasia pallida]	XP_020908604.1	213 kDa	0.086	0.027191	0.017554	0.030837	0.019184	0.0069293	0.013371	0.0168	0.0115	0.0168	0.0194	0.00839	0.0136	3	2	3	3	1	2	3	2	3	3	1	2	(K)FTVDTVDIGK(V),(K)FTVETVDIGK(I)	(K)FTVDTVDIGK(V),(K)GIFVEEVDVLPAEGER(T),(K)LDQVTVEVPSR(S)	c31592_g1_i1	MKFFTKVLQERGINDSRDDQDPLYSKNSKMEPGNVTGQSNTLVSPDWEKELMDADLTPGSHGQTVKKVVTRTEVRTVRTVDGRIVEDEYDPGTERVDIERYGYGGKTVNGDGPSTPRKSAGSQSSMDGYRSPRGTGARGGYSSADEGRRVPASNGPSGYMSDSYATPQAVQRTPSQGSAQGEPQYVRTAVQTTSMSLPRSHGPSPGPRGPGTATMPRTSSSGRPSTTYNLSIKVGDVKGTGTDGNVYIQLFGEKGNTAKIQLRQAGDTRNRFEKGRTYKFTVDTVDIGKVDRIKLSHDHTGYGSGFYVEEVEIEIPDRQDRVKFPCRCWLAQDVDDGKIEREMFPVPQLPNTSYTMSVKLGEVLSPDTNLHVQLFGETGETSKIMLRPVGTSFNRFEKG…	CTND2_HUMAN	Catenin delta-2	Q9UQB3	Homo sapiens	Cell adhesion	Cell junction	Protein binding
64	90	Elongation factor 2-like [Exaiptasia pallida]	XP_020903118.1	93 kDa	0.62	0.041722	0.04071	0.023251	0.060965	0.032384	0.031008	0.0443	0.0443	0.0144	0.0743	0.0311	0.0431	2	2	1	4	2	2	2	2	1	4	2	2	(R)GFNQFVLDPIYK(L),(R)YTEPIPDVPCGNIVGLVGVDQYLVK(T)	(R)KIWAFGPEGTGPNLLVDMTK(G),(K)EGPQCEENVR(G),(K)AHLPVNESFGFTADLR(S),(K)GLSEGVPALDNYLDKL(-).	c26671_g1_i1	MSVIAHVDHGKSTLTDSLVSKAGIIAGAKAGETRFTDTRKDEQERCITIKSTAISMYYELSEDDIQHVPGGNKEERGFLINLIDSPGHVDFSSEVTAALRVTDGALVVVDSISGVCVQTETVLRQAIAERIKPVLFLNKMDRALLELQLEKEDLYQTFTRIVESVNVIIATYSDEDGPMGDITVSPEKGTVGFGSGLHGWAFSLKQFAEIYATKFKIEPKKLMNRLWGNSFYSAKEKKWKKEFAEGYVRGFNQFVLDPIYKVFDSVMNFKKDETQKLIDKLNIKLSVPEKEMEGKPLMKAMMRRWLPAGDTMLQMITMHLPSPVVSQNYRMELLYEGPKDDPIALGIKNCDPKAELCLYVSKMVPTTDKGRFYAFGRVFSGTVATGQKVRIMGPKYVPG…	EF2_CAEEL	Elongation factor 2	P29691	Caenorhabditis elegans	Translation	Cytoplasm	Nucleotide binding
65	93	Chitinase-3-like protein 1 [Exaiptasia pallida]	XP_020902240.1	54 kDa	0.66	0.15639	0.24355	0.083446	0.14225	0.1565	0.11623	0.144	0.144	0.0903	0.0924	0.0924	0.0595	1	2	1	3	3	3	1	1	1	3	3	3	(R)VCYYTNWSQYRPK(G),(K)TQIAVGGWTHEEK(D),(K)TQIAVGGWTHEEKDSPFSK(M),(R)LLLTAAVAAGLWTIK(G),(K)GAYDIEGISKPLDWINVMTYDLHGTWEYK(T),(K)TGHHTAMGPDGDKLTLXFAIWYWMNNR(D).	(K)YEENDFDLYKR(I),(K)TQIAVGGWTHEEKDSPFSK(M),(K)FGFDGLDLDWEYPGMR(G),(R)EAFEAEAK(A),(K)IVLGLATYGR(A).	Unidentified	Unidentified	CHIA_MOUSE	Acidic mammalian chitinase	Q91XA9	Mus musculus	Metabolic process	Extracellular region	Chitinase activity
66	101	Xylose isomerase-like isoform X2 [Exaiptasia pallida]	XP_020915860.1	52 kDa	0.018	0.077059	0.11641	0.087391	0.054367	0.028984	0.027752	0.0592	0.0833	0.0592	0.0548	0.0263	0.0263	2	3	2	2	1	1	2	3	2	2	1	1	(K)LGVPYWTFHDR(D),(K)LGAENFVFWGGR(E),(K)HQYDYDAQTVIGFLK(T)	(R)DVAPEGETLAETNANLDEITDLALELQK(K),(K)LLWATCNLFANPR(Y),(K)LGAENFVFWGGR(E)	c21124_g1_i1	MSSFAPSTKRAKIASSEVSERDYFKGIPKIEFKPDAGATDVLCYKHYNAKEVINGKTMEEWLRFSVCYWHTFRGTGADPFGFPTLTRPWEDGTNSMENAKRRLRVAFEFFSKLGVPYWTFHDRDIAPEGETLAETNANLDEITDLALELQKKTGVKLLWATCNLFAHTRYMNGAATNPDAHVFAYAAAQVKKGLEIAKKLGAENFVFWGGREGYHTMLNTDVKRELDHMANFFRMVIAYKKKIGFTGQLLIEPKPKEPTKHQYDYDAQTVIGFLKTYGLDKDFKLNIEPNHTTLAGHSYEHDVVVASKYGLLGSIDSNTGSPDLGWDTDQFPMDVKNCTFVMKAVIEQDGLAPGGLNFDCKVRRESTDVQDMFIAHIGAMDSFARGLKSAVKLIEEGKL…	XYLA_HORVU	Xylose isomerase	Q40082	Hordeum vulgare	Metabolic process	Unknown	Isomerase activity
67	103	Acidic mammalian chitinase-like [Exaiptasia pallida]	XP_020902237.1	35 kDa	0.014	0.72751	0.49945	0.37607	0.081236	0.089375	0.13447	0.343	0.234	0.21	0.0729	0.0729	0.1	4	4	1	1	1	1	2	2	1	1	1	1	(R)LLLTAAVAAGLWTIK(G),(K)GAYDIEGISKPLDWINVMTYDLHGTWESK(T),(K)TGHHTAMGPEGDKLTLPFAIWYWMNNR(D),(R)DTWEKPGIR(N),(K)IVLGLGTYGR(A),(K)YTGAEGFLAYFEICK(L),(K)LGLTVVHK(N).	(R)EAFEAEAK(A),(R)DTWEKPGIR(N),(R)AFGLANPANNGLDAAR(D).	Unidentified	Unidentified	CHIA_HUMAN	Acidic mammalian chitinase	Q9BZP6	Homo sapiens	Metabolic process	Extracellular region	Chitinase activity
68	114	Puromycin-sensitive aminopeptidase-like [Exaiptasia pallida]	XP_020896508.1	146 kDa	0.37	0.026495	0.012784	0.014858	0.018693	0.04206	0.019691	0.021	0.0101	0.0101	0.0202	0.0349	0.021	2	1	1	2	4	2	2	1	1	2	4	2	(K)YCAVTQFEPTDAR(R),(K)FALEVAVKTLPFYK(E)	(K)FALEVAVK(T),(K)EYFGISYPLPK(M),(R)ETALLIDPENSSSATK(Q),(R)TVQQSLENVR(L)	c31007_g1_i1	MNCTLLRFSLCSKLLLRPLSLSFSFSSTQFPVIHKVSLTFTSRFTTMSRKPFERLPANVVPKNYDLTLQPSLTEFTFSGKQVVEVEVTKATNKVVLNSLDIKISSVKFTAGSVDLSAGDISYSKEDETATILFSSELPVGKGNLYLDFTGELNDKMKGFYRSKYLDDGKEKYCAVTQFEPTDARRAFPCWDEPAQKATFDVTLVVPKDLVALSNMNVVEEKQADDDKSLKVVKYARTPVMSTYLLAFVVGEYDYVEDKDKDGVLVRVYTPKGKAVQGKFALEVAVQTLPFYKDYFGISYPLPKMDLIAIADFAAGAMENWGLVTYRETALLIDPENSSSAAKQWVALVVGHEIAHQWFGNLVTMEWWTHLWLNEGFATWIEYLCVDHCFPEYDIWTQFV…	PSA_MOUSE	Puromycin-sensitive aminopeptidase	Q11011	Mus musculus	Proteolysis	Cytoplasm	Metallopeptidase activity
69	119	Superoxide dismutase [Mn], mitochondrial-like [Exaiptasia pallida]	XP_020892835.1	25 kDa	0.043	0.078444	0.076542	0.088961	0.26989	0.12992	0.19934	0.0402	0.0402	0.0402	0.232	0.165	0.232	1	1	1	4	2	3	1	1	1	3	2	3	(K)DFGSFENFK(X)	(K)HTLPDLAYDYDALEPTINTEIMR(L),(K)HHATYVNNLNVAEEK(Y),(K)AIYDVIDWTNVADR(Y).	c27625_g1_i1	MLSRAKSGFQCMQKLSPAVLNVLVRAKHTLPDLAYDYDALEPTINTDIMRLHHSKHHQTYVNNLNVAEEKFAEAQAKGDLAATIALQPALKFNGGGHLNHTIFWTNLSPNGGGEPTGELMEAIKRDFGSFENFKERFNAATIAVQGSGWGWLGYDKVNKRLAISTCVNQDPLQATTGHIPLLGIDVWEHAYYLQYKNVRPDYVKAIYDVVDWTNVADRYQAATN	SODM_MACNE	Superoxide dismutase [Mn], mitochondrial	Q5FB30	Macaca nemestrina	Oxidation-reduction process	Mitochondrion	Oxidoreductase activity
70	121	Disks large homolog 1-like isoform X1 [Exaiptasia pallida]	XP_020892827.1 (+3)	97 kDa	0.55	0.019676	0.039043	0.045378	0.02823	0.031058	0.029738	0.0183	0.0469	0.0469	0.024	0.024	0.04	1	2	2	2	2	2	1	2	2	2	2	2	(K)GLGFSIAGGHGNQHVPGDNGIYITK(I), (R)LQVAQLYPIAIFIKPK(S).	(K)IIDGGAAQQDGR(L), (K)ELVTIVISR(I), (K)GAGSTVTITAQYKPEEYNQFEAK(I).	c29719_g1_i1	MPVHKEDADRALELLEKYHEKLTKPQDRALRGAIERVIRIFQSRLFLALLDIQEFYEATLLDGSKSPQQKAYETLEVAEKWETRPVDSDQGDVSHPHYSNDKVNSTPRDERAPETQRSEPQPYTPVSFTSQIPSESLPLAPESVDGPDKKEKEIPSSDEDHEYLDITLKRGGAGLGFSIAGGTDNPHIDDDFGIYITKVIKGGAAAQDGRLRVNDCITAVNETTTVNVNHQQAVDALKAAGEHVTLAVKRKKDKGKTPHREEIILSKGSKGLGFSIAGGHGNQHVPGDNGIYITKIIDGGAAQQDRRLQVGDKIISVNDKNLEDVSHEDAVQVLKATKEKVIIVISRLAGFNGEDTSVPTPVAPVTPAVTPAVQETTQTSPPEAPKTGENGSLTNSLPP…	DLG1_XENTR	Disks large homolog 1	Q28C55	Xenopus tropicalis	Cell adhesion	Membrane	Unknown
71	133	Glutamyl aminopeptidase-like isoform X1 [Exaiptasia pallida]	XP_020909182.1	123 kDa	0.22	0.015572	0	0.01766	0.033841	0.012087	0.023453	0.0216	0	0.0216	0.0207	0.0122	0.0122	1	0	1	3	1	2	1	0	1	2	1	1	(K)QWVATVVAHELAHQWFGNLVTmK(W)	(R)HIATTHFEPTDAR(A),(K)MMDQFLLDK(A).	c32035_g1_i1	QLLFIHVLMDEGYSPDNEGWSSSDSFEDIDNVSLLPDIERKPNRIRRRRVRFLRDRSCEFSIRRMCSRRTLVYTSITAVLLVSVVLISVFVKPSTSEEFEETKPEKRSETQDEPQKKEDIKSEKPYLDHEGNKFGWQNIRLPTNLVPLKYRVELHPNITTFKFTGTVDMLVKCVNNTDKIFFHAKHMEITTIKVAKIKKKGDELEVLTIKKITRSKELEMQSIQVNEELQADQDYIVFVEFKAPLSDKLFGFYKSSYKNKRGEIRYLATTHFEPTDARAAFPCFDEPALKAKFEIIIIRDQHHTALSNMPLRKTEKLKDGLLKDYFEETVKMSTYLIAFVVCDFKHLSDRTQSGTLVRVWAPPDDIEEARFALSEAKKILFYYEKFFKVNFPLPKLDLI…	AMPE_BOVIN	Glutamyl aminopeptidase	Q32LQ0	Bos taurus	Proteolysis	Membrane	Peptidase activity
72	136	Prostasin-like [Exaiptasia pallida]	XP_020912686.1	45 kDa	0.0015	0.042971	0.04193	0.048733	0.062856	0.069153	0.066214	0.0455	0.0455	0.0455	0.0732	0.0732	0.0732	1	1	1	2	2	2	1	1	1	2	2	2	(K)HPFYDAYNNHDYDVALLK(M)	(K)GAWPWQITMNYK(N),(K)GGIDACQGDSGGPLVCK(T)	c26944_g1_i1	MVIRVILVLSFFCGVAANAPSLDELNELFKQEHVRNKRSDCVDQMQYCSSYKAYCNDPAYKDYLKKECKKTCNFCVKPCVDRFPKCTVYLSSCAIDSYRKSLEYYCSKTCGFCKVPTTTQAPTTLPRTEKPIEHGDIKCGTKGKGNTRIVGGTRAKKGAWPWQITMNYKNNKAAKTPHWCGGSVVAKQWIVTAAHCFVYGDNPSDYTVVMGEHDLNVTDGYEQKIDIERIIKHPFYDAYNNHDYDVALIKLKSNLTFNDRVRPVCLPSNDYPAGANCYISGWGHLFESGHGPWVLHQAMVPLVSRNVCQKSFDDLRYKLTARMRCAGNGIGGIDACQGDSGGPLVCKTGDTWYLMGAISWGIGCARKNRYGVYSDMTDLKYWVQGTIHAD	KLKB1_BOVIN	Plasma kallikrein	Q2KJ63	Bos taurus	Proteolysis	Extracellular region	Peptidase activity
73	140	Glutaredoxin-3-like [Exaiptasia pallida]	XP_020913610.1	37 kDa	0.88	0.052463	0.051191	0.059497	0.077339	0.040722	0.038991	0.0399	0.0399	0.0399	0.0736	0.0399	0.0399	1	1	1	2	1	1	1	1	1	2	1	1	(K)YEISAVPTFLLFK(N)	(K)YEISAVPTFLLFK(N),(R)INGANAPELTK(K)	c8468_g1_i1	YHITSNMAAVNEVISSAQFDKILSDSSRALTVVYFFAPWSPQYGQMSDVVQVLSKDNPHVTFVKLEAEKVPEVSYKYEISAVPTFLLFKNQKVVDRINGANAPELTKKVEHHSSIITPPQVNDEPPIAKEDINTRLKNIINSSPCMLFMKGTPEEPKCGFSRQVVEVLKNVCADYGSFDILKDDDVRQGLKKYSNWPTYPQLYVNGELVGGLDIIKEMAESGDLQSMLPKKQDLKSRLESLINSSPVMLFMKGNQDTPRCGFSRQMVGILAKYNPKIPLKTFDILQDNEVREGLKKHSNWPTYPQLYSKGELIGGLDIVRELDENGELEDALGIKE	GLRX3_XENTR	Glutaredoxin-3	Q28ID3	Xenopus tropicalis	Oxidation-reduction process	Cytosol	Oxidoreductase activity
74	145	Glutathione S-transferase Mu 3-like [Exaiptasia pallida]	XP_020903965.1	14 kDa	0.51	0.14113	0	0.16005	0.2231	0.10954	0.10489	0.131	0	0.131	0.238	0.107	0.107	1	0	1	2	1	1	1	0	1	2	1	1	(K)ITFVDFVMYELLDQHK(V)	(R)LLLNYVGEEFEDR(K),(K)ITFVDFVMYELLDQHK(V)	c27898_g1_i1	MAPVFAYWDIRGLAQPIRLLLHYSEVEFEDKRYSCGPAPDYSRECWMKDKFTLGLDFPNLPYYIDGDIKITQSNAIVRHIARKKNLCGETEKEKVIVDMMENQLMDFRNGFVGLCYNVKGYDDAKPKYLENVVPKIKAFADFLGEKKFLVGDKITFVDFVMYELLDQHKVFDASLLEPHANLKAYLERIEALPAIAEYMKSDKFITRPINNTVAKWR	GSTM3_HUMAN	Glutathione S-transferase Mu 3	P21266	Homo sapiens	Metabolic process	Cytosol	Transferase activity
75	146	Predicted protein [Nematostella vectensis]	XP_001631110.1 (+5)	21 kDa	0.047	0.09394	0.091663	0	0.14317	0.15751	0.15082	0.0652	0.0652	0	0.125	0.125	0.125	1	1	0	2	2	2	1	1	0	2	2	2	(K)INVNEIFYDLVR(Q)	(K)LVVLGSGGVGK(S),(K)INVNEIFYDLVR(Q).	c31585_g1_i1	MREYKLVVLGSGGVGKSALTVQFVQGIFVEKYDPTIEDSYRKQVEVDAQQCMLEILDTAGTEQFTAMRDLYMKNGQGFVLVYSITAQSTFNDLQDLREQILRVKDTDDVPMVLVGNKCDLEDERVVGKDQGQNLAKQFSNCTFLETSAKLKINVNEIFYDLVRQINRKTPEAKNKKKKKGCVLL	RAP1B_RAT	Ras-related protein Rap-1b	Q62636	Rattus norvegicus	Cell communication	Cell junction	Nucleotide binding
76	149	Lethal(2) giant larvae protein homolog 1-like isoform X1 [Exaiptasia pallida]	XP_020899312.1 (+1)	131 kDa	0.91	0	0.014174	0.016474	0	0.02283	0.010796	0	0.0102	0.0102	0	0.0178	0.0135	0	1	1	0	2	1	0	1	1	0	2	1	(R)IQELHFLPEQGR(I),(R)CIYFVDTFLK(D)	(K)ISVCSLSMK(T),(K)VEWHDNYIFFAGGMPR(A)	c30500_g1_i1	MLKLVRRYRGKSTDAHIKDKLGQELFAFNKTIEHGFPHKPSALAHDPQLQLLAIGTEDGTLRIYGKPGVQLTACHEEETRIQELHFLPEQGRIISVCDDGEQNSIHLWEVNKKEGKSVLEEVKTCTLEGRLKKISVCCLSMKTNRLLLGTEGGNIYLLDINSFELQEYVIYQDVVMQSVEEENKTNAGSVEAIQEHPEDSKKILIGYKKGLIVLWNHESCNVQHTFPNSIDLESISWNEAGDKFISSHADGSQSIWSVPKSEAITTEETSTPFGPFPCKAITKVEWQDNTILFAGGMPRASYGDKNTISLMQGSSTQVVFDFSSRVIDFLVISNPDTNKPACLAVLCEQEFVVIDLQTKEQGYPTFLQPYLICLHSSPITTSFHCRGCSNELWDQINAA…	L2GL1_RAT	Lethal(2) giant larvae protein homolog 1	Q8K4K5	Rattus norvegicus	Exocytosis	Cytoskeleton	Protein binding
77	162	Peroxiredoxin-4-like [Exaiptasia pallida]	XP_020914260.1	29 kDa	0.13	0.14419	0.22352	0.077272	0.10173	0	0.050639	0.0873	0.127	0.0317	0.0833	0	0.0317	1	2	0	1	0	0	1	2	0	1	0	0	(K)YPLLSDLNQQISK(D),(K)DYGVLLENEGHTLR(G),(R)GLFIIDDK(G)	(R)GLFIIDDK(G),(K)HGEVCPAGWKPGK(D),(R)LVQAFQYTDK(H)	c20800_g1_i1	MASLVILSILLAFFTSQSFANKVEDEDQCRTYAGGQVYPERTRIPEHAMHWSKARISKPAPFWEGNAVVNGEFKALKLSDFLGKYLVFFFYPLDFTFVCPTEIIAFSDRIDEFRAINAEVVACSVDSVFTHLAWINTPRKEGGLGKLKYPLLSDLNQQISKDYGVLLENEGHTLRGLFIIDDKGILRQITMNDLPVGRSVDETLRLVQAFQYTDKHGEVCPAGWKPGKDTIIPDPKEKVKYFEKQAEKKSEL	PRDX4_MOUSE	Peroxiredoxin-4	O08807	Mus musculus	Oxidation-reduction process	Cytoplasm	Peroxiredoxin activity
78	188	Serpin B6-like [Exaiptasia pallida]	XP_020902588.1	44 kDa	0.88	0.043518	0.042463	0	0.030703	0	0.067086	0.0256	0.0256	0	0.0256	0	0.0563	1	1	0	1	0	2	1	1	0	1	0	2	(R)ATLVNAIYFK(G)	(R)ATLVNAIYFK(G),(K)ADFTGITVGPEK(L)	c26903_g1_i1	MSAVATAVNQFAVDLHAVLKSQEKFLGDNLFYSPTSLSIALGMVYSGARGSTAEQIANGFHWKSLEVEKLNESMKSFSDALTSSNTASNELNTANRLFLQQGFEVIQEFTDCCKKFYDAETALVDYKKDFEGARKLINTWVEEKTKDKIKELLPSGSLNSLTRATLVNAIYFKGIWEKQFEKAHTYDSTFFTSLNKEMKIKMMFQKSKFKFLEARNLDCQLLEMPYTGGDLSMVILLPNEIEGLSKLEEKLTYDALQGALTSVTKARPLEVEVSIPKFSMTRQFELKEILQRMGMGDMFDQVESNFTGLIKGPGKLYVSEVFHKAFVDVNEEGTEAAAATAAVMMTRMMVRPPPSFTADHPFLFLIRHCKSDAILFLGRVAKPESKE	ILEU_XENTR	Leukocyte elastase inhibitor	Q5I0S8	Xenopus tropicalis	Regulation of proteolysis	Extracellular region	Protease inhibitor

## Sheet: S2
Interactome of Anthopleura dowii Verrill (1869)
#clustering method	cluster number	cluster color	gene count	protein name	protein identifier	protein description
MCL	1	Red	13	c12347_g1_i1	45351.EDO41372	14-3-3 protein epsilon; Predicted protein; Belongs to the 14-3-3 family
MCL	1	Red	13	c22293_g1_i1	45351.EDO37976	Actin, cytoplasmic 1; Predicted protein; Belongs to the actin family
MCL	1	Red	13	c23174_g1_i1	45351.EDO47722	Protein lin-7 homolog c isoform x1; Predicted protein
MCL	1	Red	13	c26413_g1_i1	45351.EDO47764	Pdz and lim domain protein 7 isoform x2; Predicted protein
MCL	1	Red	13	c29371_g1_i1	45351.EDO41227	Alpha-actinin-1 isoform X1; Predicted protein
MCL	1	Red	13	c30299_g1_i1	45351.EDO35762	Vinculin-like
MCL	1	Red	13	c30882_g1_i1	45351.EDO45013	Actin, cytoplasmic 1; Predicted protein; Belongs to the actin family
MCL	1	Red	13	c31556_g1_i1	45351.EDO35729	Catenin beta-like
MCL	1	Red	13	c31585_g1_i1	45351.EDO39047	Ras-related protein rap-1a; Predicted protein
MCL	1	Red	13	c31592_g1_i1	45351.EDO39592	Catenin delta 2. uncharacterized protein
MCL	1	Red	13	c31886_g1_i1	45351.EDO46947	Filamin-a isoform x1; Predicted protein
MCL	1	Red	13	c31918_g1_i1	45351.EDO48695	Catenin alpha-2-like
MCL	1	Red	13	c32098_g1_i1	45351.EDO47777	Low quality protein: talin-2; Predicted protein
MCL	2	Brown	12	c13561_g1_i1	45351.EDO41453	Triosephosphate isomerase (tim); Triosephosphate isomerase
MCL	2	Brown	12	c21124_g1_i1	45351.EDO41326	Xylose isomerase
MCL	2	Brown	12	c21742_g1_i1	45351.EDO50035	Transaldolase; Transaldolase is important for the balance of metabolites in the pentose-phosphate pathway
MCL	2	Brown	12	c21744_g1_i1	45351.EDO40842	Glyceraldehyde-3-phosphate dehydrogenase
MCL	2	Brown	12	c23200_g1_i1	45351.EDO30550	Adenylate kinase 2, mitochondrial; Adenylate kinase; Catalyzes the reversible transfer of the terminal phosphate group between ATP and AMP. Plays an important role in cellular energy homeostasis and in adenine nucleotide metabolism. Adenylate kinase activity is critical for regulation of the phosphate utilization and the AMP de novo biosynthesis pathways
MCL	2	Brown	12	c25775_g1_i1	45351.EDO33525	Malate dehydrogenase (oxaloacetate-decarboxylating)(nadp+); Malic enzyme
MCL	2	Brown	12	c26015_g1_i1	45351.EDO37672	Fructose-bisphosphate aldolase, class i; Belongs to the class I fructose-bisphosphate aldolase family
MCL	2	Brown	12	c26403_g1_i1	45351.EDO30176	Malate dehydrogenase, mitochondrial; Malate dehydrogenase
MCL	2	Brown	12	c26781_g1_i1	45351.EDO37039	Glucose-6-phosphate isomerase ; Belongs to the GPI family
MCL	2	Brown	12	c28955_g1_i1	45351.EDO46772	Ribokinase; Catalyzes the phosphorylation of ribose at O-5 in a reaction requiring ATP and magnesium. The resulting D-ribose-5- phosphate can then be used either for sythesis of nucleotides, histidine, and tryptophan, or as a component of the pentose phosphate pathway
MCL	2	Brown	12	c30804_g1_i1	45351.EDO40843	Alpha-enolase isoform x2; Predicted protein
MCL	2	Brown	12	c31736_g1_i1	45351.EDO49963	Pyruvate kinase pkm; Pyruvate kinase ; Belongs to the pyruvate kinase family
MCL	3	Olive	10	c10977_g1_i1	45351.EDO34613	Peptidyl-prolyl cis-trans isomerase b (cyclophilin b); Peptidyl-prolyl cis-trans isomerase; PPIases accelerate the folding of proteins. It catalyzes the cis-trans isomerization of proline imidic peptide bonds in oligopeptides
MCL	3	Olive	10	c18453_g1_i1	45351.EDO34629	Peptidyl-prolyl cis-trans isomerase b (cyclophilin b); Peptidyl-prolyl cis-trans isomerase; PPIases accelerate the folding of proteins. It catalyzes the cis-trans isomerization of proline imidic peptide bonds in oligopeptides
MCL	3	Olive	10	c20800_g1_i1	45351.EDO38694	Peroxiredoxin 2/4; Predicted protein
MCL	3	Olive	10	c23438_g1_i1	45351.EDO49786	Calnexin isoform x1; Predicted protein
MCL	3	Olive	10	c23602_g1_i1	45351.EDO33296	Endoplasmic reticulum chaperone bip; Predicted protein; Belongs to the heat shock protein 70 family
MCL	3	Olive	10	c27026_g1_i1	45351.EDO37280	Heat shock cognate 71 kda protein; Predicted protein; Belongs to the heat shock protein 70 family
MCL	3	Olive	10	c27374_g1_i1	45351.EDO37155	Protein disulfide-isomerase a6 homolog; Predicted protein; Belongs to the protein disulfide isomerase family
MCL	3	Olive	10	c27447_g1_i1	45351.EDO36830	Protein disulfide-isomerase a1; Protein disulfide-isomerase
MCL	3	Olive	10	c27931_g1_i1	45351.EDO37116	Putative aminopeptidase w07g4.4 isoform x1; Predicted protein
MCL	3	Olive	10	c31660_g2_i2	45351.EDO47723	Stress-70 protein, mitochondrial; Predicted protein; Belongs to the heat shock protein 70 family
MCL	4	Green	8	c19136_g1_i1	45351.EDO36687	Ras-related protein rab-2a; Predicted protein
MCL	4	Green	8	c20951_g1_i1	45351.EDO45332	Ras-related protein rab-7a; Predicted protein
MCL	4	Green	8	c22821_g1_i1	45351.EDO49425	Golgi reassembly-stacking protein 2; Predicted protein
MCL	4	Green	8	c23411_g1_i1	45351.EDO40167	Ras-related protein rab-1a; Predicted protein
MCL	4	Green	8	c24410_g1_i1	45351.EDO44348	Rab GDP dissociation inhibitor; Regulates the GDP/GTP exchange reaction of most RAB proteins by inhibiting the dissociation of GDP from them, and the subsequent binding of GTP
MCL	4	Green	8	c29834_g1_i1	45351.EDO46810	Sorting nexin-5/6/32; Sorting nexin; Involved in several stages of intracellular trafficking
MCL	4	Green	8	c30000_g2_i1	45351.EDO45913	Gamma-aminobutyric acid receptor-associated protein-like 2; Predicted protein; Belongs to the ATG8 family
MCL	4	Green	8	c31046_g4_i1	45351.EDO33171	Ras-related protein rab-11a; Predicted protein
MCL	5	Green 2	4	XP_020895630.1	45351.EDO42040	Superoxide dismutase [Cu-Zn]; Destroys radicals which are normally produced within the cells and which are toxic to biological systems; Belongs to the Cu-Zn superoxide dismutase family
MCL	5	Green 2	4	c23425_g1_i1	45351.EDO37954	Predicted protein; Thioredoxin domain-containing protein 3 homolog
MCL	5	Green 2	4	c23742_g1_i2	45351.EDO48197	Peroxiredoxin-1 isoform X2; Predicted protein
MCL	5	Green 2	4	c27625_g1_i1	45351.EDO49016	Superoxide dismutase [mn], mitochondrial; Superoxide dismutase; Destroys radicals which are normally produced within the cells and which are toxic to biological systems
MCL	6	Cyan	4	XP_020902061.1	45351.EDO49743	Acidic mammalian chitinase; Predicted protein; Belongs to the glycosyl hydrolase 18 family
MCL	6	Cyan	4	XP_020902237.1	45351.EDO40446	Chitinase-3-like protein 1; Predicted protein; Belongs to the glycosyl hydrolase 18 family
MCL	6	Cyan	4	XP_020909717.1	45351.EDO49627	Chitotriosidase-1; Predicted protein; Belongs to the glycosyl hydrolase 18 family
MCL	6	Cyan	4	c30952_g1_i1	45351.EDO49845	Beta-hexosaminidase subunit alpha; Beta-hexosaminidase

## Sheet: S3
Interactome of Lebrunia neglecta Duchassaing & Michelotti, 1860
#clustering method	cluster number	cluster color	gene count	protein name	protein identifier	protein description
MCL	1	Red	13	XP_020912038.1	45351.EDO47340	Protein disulfide-isomerase like 2-1-like [Exaiptasia pallida]
MCL	1	Red	13	XP_020898099.1	45351.EDO48212	Predicted protein
MCL	1	Red	13	c27026_g1_i1	45351.EDO37280	Heat shock cognate 71 kda protein; Predicted protein; Belongs to the heat shock protein 70 family
MCL	1	Red	13	c23438_g1_i1	45351.EDO49786	Calnexin isoform x1; Predicted protein
MCL	1	Red	13	XP_020907283.1	45351.EDO45344	Endoplasmin-like
MCL	1	Red	13	c23602_g1_i1	45351.EDO33296	Endoplasmic reticulum chaperone bip; Predicted protein; Belongs to the heat shock protein 70 family
MCL	1	Red	13	c18453_g1_i1	45351.EDO34629	Peptidyl-prolyl cis-trans isomerase b (cyclophilin b); Peptidyl-prolyl cis-trans isomerase; PPIases accelerate the folding of proteins. It catalyzes the cis-trans isomerization of proline imidic peptide bonds in oligopeptides
MCL	1	Red	13	XP_001620090.1	45351.EDO27990	60 kDa chaperonin
MCL	1	Red	13	XP_020895514.1	45351.EDO37155	Protein disulfide-isomerase a6 homolog; Predicted protein; Belongs to the protein disulfide isomerase family
MCL	1	Red	13	XP_020896728.1	45351.EDO48626	Heat shock protein HSP 90-alpha-like [Exaiptasia pallida]
MCL	1	Red	13	c10977_g1_i1	45351.EDO34613	Peptidyl-prolyl cis-trans isomerase b (cyclophilin b); Peptidyl-prolyl cis-trans isomerase; PPIases accelerate the folding of proteins. It catalyzes the cis-trans isomerization of proline imidic peptide bonds in oligopeptides
MCL	1	Red	13	c27447_g1_i1	45351.EDO36830	Protein disulfide-isomerase
MCL	1	Red	13	XP_020904893.1	45351.EDO31634	Protein disulfide-isomerase
MCL	2	Brown	11	XP_020600429.1	45351.EDO38520	Predicted protein; Belongs to the actin family
MCL	2	Brown	11	C22293_g1_i1	45351.EDO37976	Predicted protein; Belongs to the actin family
MCL	2	Brown	11	c31886_g1_i1	45351.EDO46947	Filamin-A
MCL	2	Brown	11	c30882_g1_i1	45351.EDO45013	Actin, cytoskeletal 1A
MCL	2	Brown	11	c30299_g1_i1	45351.EDO35762	Vinculin
MCL	2	Brown	11	c26413_g1_i1	45351.EDO47764	Regulation of cell-matrix adhesion
MCL	2	Brown	11	c32098_g1_i1	45351.EDO47777	Cell adhesion
MCL	2	Brown	11	c31918_g1_i1	45351.EDO48695	Cell adhesion
MCL	2	Brown	11	c31585_g1_i1	45351.EDO39047	Predicted protein
MCL	2	Brown	11	c31592_g1_i1	45351.EDO39592	Cell adhesion
MCL	2	Brown	11	XP_020900069.1	45351.EDO39230	Predicted protein; Cadherins are calcium-dependent cell adhesion proteins
MCL	3	Yellow	7	C22821_g1_i1	45351.EDO49425	Golgi reassembly-stacking protein 2
MCL	3	Yellow	7	c19136_g1_i1	45351.EDO36687	Ras-related protein Rab-2
MCL	3	Yellow	7	c20951_g1_i1	45351.EDO45332	Ras-related protein Rab-7a
MCL	3	Yellow	7	c23411_g1_i1	45351.EDO40167	Ras-related protein Rab-1A
MCL	3	Yellow	7	XP_001641545.1	45351.EDO49675	Protein transport
MCL	3	Yellow	7	XP_020899502.1	45351.EDO49162	Lysosomal aspartic protease
MCL	3	Yellow	7	C29834_g1_i1	45351.EDO46810	Protein transport
MCL	4	Green	5	XP_020902294.1	45351.EDO33547	40S ribosomal protein S4
MCL	4	Green	5	c11211_g1_i1	45351.EDO45561	Ubiquitin-60S ribosomal protein L40
MCL	4	Green	5	c26671_g1_i1	45351.EDO45605	Elongation factor 2
MCL	4	Green	5	XP_020896757.1	45351.EDO48468	Elongation factor 2
MCL	4	Green	5	XP_020912889.1	45351.EDO39883	Elongation factor Tu-like. uncharacterized protein LOC110250626 isoform X2 [Exaiptasia pallida]
MCL	5	Green 2	4	XP_020911328.1	45351.EDO43514	Neural cell adhesion molecule 1-like [Exaiptasia pallida]
MCL	5	Green 2	4	XP_020907185.1	45351.EDO45343	Fibronectin type III domain-containing protein-like [Exaiptasia pallida]
MCL	5	Green 2	4	c32124_g1_i2	45351.EDO42431	Spectrin beta chain, non-erythrocytic 1
MCL	5	Green 2	4	c31850_g1_i1	45351.EDO45834	EGF and laminin G domain-containing protein
MCL	6	Lime Green	7	c30804_g1_i1	45351.EDO40843	Spectrin beta chain isoform x1; Spectrin beta chain; Belongs to the spectrin family
MCL	6	Lime Green	7	13561_g1_i1	45351.EDO41453	Triosephosphate isomerase
MCL	6	Lime Green	7	c21742_g1_i1	45351.EDO50035	Transaldolase; Transaldolase is important for the balance of metabolites in the pentose-phosphate pathway
MCL	6	Lime Green	7	c26015_g1_i1	45351.EDO37672	Belongs to the class I fructose-bisphosphate aldolase family
MCL	6	Lime Green	7	c21124_g1_i1	45351.EDO41326	Xylose isomerase
MCL	6	Lime Green	7	c23425_g1_i1	45351.EDO37954	Predicted protein; Belongs to the NDK family
MCL	6	Lime Green	7	c28955_g1_i1	45351.EDO46772	Ribokinase; Catalyzes the phosphorylation of ribose at O-5 in a reaction requiring ATP and magnesium. The resulting D-ribose-5- phosphate can then be used either for sythesis of nucleotides, histidine, and tryptophan, or as a component of the pentose phosphate pathway
MCL	7	Dark Golden Rod	8	c20800_g1_i1	45351.EDO39047	Ras-related protein rap-1a; Predicted protein
MCL	7	Dark Golden Rod	8	XP_020899677.1	45351.EDO48974	Citrate synthase ; Belongs to the citrate synthase family
MCL	7	Dark Golden Rod	8	XP_020893863.1	45351.EDO41684	Catalase-like
MCL	7	Dark Golden Rod	8	c23742_g1_i2	45351.EDO48197	Peroxiredoxin-2-like isoform X1
MCL	7	Dark Golden Rod	8	c25315_g1_i1	45351.EDO43318	Predicted protein; Electron carrier protein. The oxidized form of the cytochrome c heme group can accept an electron from the heme group of the cytochrome c1 subunit of cytochrome reductase. Cytochrome c then transfers this electron to the cytochrome oxidase complex, the final protein carrier in the mitochondrial electron-transport chain
MCL	7	Dark Golden Rod	8	c27625_g1_i1	45351.EDO49016	Superoxide dismutase; Destroys radicals which are normally produced within the cells and which are toxic to biological systems
MCL	7	Dark Golden Rod	8	XP_020895630.1	45351.EDO42040	Superoxide dismutase [Cu-Zn]; Destroys radicals which are normally produced within the cells and which are toxic to biological systems; Belongs to the Cu-Zn superoxide dismutase family
MCL	7	Dark Golden Rod	8	XP_020895378.1	45351.EDO36318	Predicted protein

## Sheet: S4
Interactome of differentially expressed proteins
#clustering method	cluster number	cluster color	gene count		protein name	protein identifier	protein description
MCL	1	Red	7	Up	XP_020895514.1	45351.EDO37155	Protein disulfide-isomerase a6 homolog; Predicted protein; Belongs to the protein disulfide isomerase family
MCL	1	Red	7	Down	c10977_g1_i1	45351.EDO34613	Peptidyl-prolyl cis-trans isomerase b (cyclophilin b); Peptidyl-prolyl cis-trans isomerase; PPIases accelerate the folding of proteins. It catalyzes the cis-trans isomerization of proline imidic peptide bonds in oligopeptides
MCL	1	Red	7	Up	c18453_g1_i1	45351.EDO34629	Peptidyl-prolyl cis-trans isomerase b (cyclophilin b); Peptidyl-prolyl cis-trans isomerase; PPIases accelerate the folding of proteins. It catalyzes the cis-trans isomerization of proline imidic peptide bonds in oligopeptides
MCL	1	Red	7	Up	c23438_g1_i1	45351.EDO48109	Calreticulin-like [Exaiptasia pallida]
MCL	1	Red	7	Down	c23602_g1_i1	45351.EDO33296	Endoplasmic reticulum chaperone bip; Predicted protein; Belongs to the heat shock protein 70 family
MCL	1	Red	7	Down	c27026_g1_i1	45351.EDO37280	Heat shock cognate 71 kda protein; Predicted protein; Belongs to the heat shock protein 70 family
MCL	1	Red	7	Down	c31660_g2_i2	45351.EDO47723	Stress-70 protein, mitochondrial; Predicted protein; Belongs to the heat shock protein 70 family
MCL	2	Yellow	7	Up	c13561_g1_i1	45351.EDO41453	Triosephosphate isomerase (tim); Triosephosphate isomerase
MCL	2	Yellow	7	Down	c21124_g1_i1	45351.EDO41326	Xylose isomerase
MCL	2	Yellow	7	Down	c21742_g1_i1	45351.EDO50035	Transaldolase; Transaldolase is important for the balance of metabolites in the pentose-phosphate pathway
MCL	2	Yellow	7	Up	c26015_g1_i1	45351.EDO37672	Fructose-bisphosphate aldolase, class i; Belongs to the class I fructose-bisphosphate aldolase family
MCL	2	Yellow	7	Down	c26781_g1_i1	45351.EDO37039	Glucose-6-phosphate isomerase ; Belongs to the GPI family
MCL	2	Yellow	7	Up	c28955_g1_i1	45351.EDO46772	Ribokinase; Catalyzes the phosphorylation of ribose at O-5 in a reaction requiring ATP and magnesium. The resulting D-ribose-5- phosphate can then be used either for sythesis of nucleotides, histidine, and tryptophan, or as a component of the pentose phosphate pathway
MCL	2	Yellow	7	Down	c30804_g1_i1	45351.EDO40843	Alpha-enolase isoform x2; Predicted protein
MCL	3	Lime Green	5	Up	XP_020893863.1	45351.EDO41684	Predicted protein
MCL	3	Lime Green	5	Up	XP_020895378.1	45351.EDO36318	Protein/nucleic acid deglycase dj-1 isoform x1; Predicted protein
MCL	3	Lime Green	5	Up	XP_020895630.1	45351.EDO42040	Superoxide dismutase [Cu-Zn]; Destroys radicals which are normally produced within the cells and which are toxic to biological systems; Belongs to the Cu-Zn superoxide dismutase family
MCL	3	Lime Green	5	Up	c23742_g1_i2	45351.EDO48197	Peroxiredoxin-1 isoform X2; Predicted protein
MCL	3	Lime Green	5	Up	c27625_g1_i1	45351.EDO49016	Superoxide dismutase [mn], mitochondrial; Superoxide dismutase; Destroys radicals which are normally produced within the cells and which are toxic to biological systems
MCL	4	Green	3	Down	XP_020902061.1	45351.EDO49743	Acidic mammalian chitinase; Predicted protein; Belongs to the glycosyl hydrolase 18 family
MCL	4	Green	3	Down	XP_020909717.1	45351.EDO49627	Chitotriosidase-1; Predicted protein; Belongs to the glycosyl hydrolase 18 family
MCL	4	Green	3	Down	XP_020912807.1	45351.EDO45498	Beta-hexosaminidase; Predicted protein
MCL	5	Blue	2	Up	c17550_g1_i1	45351.EDO33599	Ubiquitin-conjugating enzyme e2 l3; Predicted protein; Belongs to the ubiquitin-conjugating enzyme family
MCL	5	Blue	2	Up	c36785_g1_i1	45351.EDO40282	Peptidyl-prolyl cis-trans isomerase fkbp2; Peptidyl-prolyl cis-trans isomerase
MCL	6	Purple	2	Down	XP_020600429.1	45351.EDO38520	Actin beta/gamma 1; Predicted protein; Belongs to the actin family
MCL	6	Purple	2	Down	c22293_g1_i1	45351.EDO37976	Actin, cytoplasmic 1; Predicted protein; Belongs to the actin family

## Sheet: S5
Differentially expressed proteins
Proteins pvalues logFC2 diffexpressed		Name				ID-transcriptome
1 XP_020909891.1 0.00010 0.04 Down		Alpha-enolase-like isoform X1 [Exaiptasia pallida]				c30804_g1_i1
2 XP_020912807.1 0.00013 0.04 Down		Beta-hezosaminidae. uncharacterized protein LOC110250538 [Exaiptasia pallida]				unidentified
3 XP_001629343.1 0.00099 0.06 Down		HSP-70. predicted protein [Nematostella vectensis]				c27026_g1_i1
4 XP_020893953.1 0.00680 0.08 Down		Transcriptional enhancer factor TEF-1-like [Exaiptasia pallida]				c2264_g1_i1
5 XP_020913341.1 0.00700 0.09 Down		Protein lin-7 homolog C-like [Exaiptasia pallida]				c23174_g1_i1
6 XP_020907479.1 0.00500 0.10 Down		Failed axon connections homolog [Exaiptasia pallida]				c18643_g3_i1
7 XP_020629795.1 0.00760 0.10 Down		NADP-specific glutamate dehydrogenase like. uncharacterized protein LOC110066880 [Orbicella faveolata]				c27917_g1_i2
8 XP_020910035.1 0.01000 0.10 Down		Glucose-6-phosphate isomerase-like [Exaiptasia pallida]				c26781_g1_i1
9 XP_020902099.1 0.00100 0.20 Down		Probable chitinase 10 [Exaiptasia pallida]				unidentified
10 XP_020902237.1 0.01400 0.20 Down		Acidic mammalian chitinase-like [Exaiptasia pallida]				unidentified
11 XP_020616724.1 0.00170 0.20 Down		Chitinase3- like. uncharacterized protein LOC110054708 [Orbicella faveolata]				unidentified
12 XP_001639786.1 0.00037 0.20 Down		HSP 70. predicted protein [Nematostella vectensis]				c31660_g2_i2
13 XP_001639010.1 0.00049 0.20 Down		Filamin A- predicted protein [Nematostella vectensis]				c31886_g1_i1
14 XP_020902061.1 0.00680 0.30 Down		Acidic mammalian chitinase-like [Exaiptasia pallida]				unidentified
15 XP_001628750.1 0.00570 0.30 Down		Ras-related Rab-2. predicted protein [Nematostella vectensis]				c19136_g1_i1
16 XP_020902796.1 0.00015 0.30 Down		Glutamate dehydrogenae like. uncharacterized protein LOC110241264 [Exaiptasia pallida]				c27917_g1_i1
17 XP_001637076.1 0.00040 0.40 Down		Actin, cytoplasmic like. predicted protein [Nematostella vectensis]				c30882_g1_i1
18 XP_020916667.1 0.02500 0.40 Down		14-3-3 protein epsilon-like [Exaiptasia pallida]				c12347_g1_i1
19 XP_020916414.1 0.00200 0.40 Down		Actin, cytoplasmic-like [Exaiptasia pallida]				c22293_g1_i1
20 XP_020915860.1 0.01800 0.40 Down		Xylose isomerase-like isoform X2 [Exaiptasia pallida]				c21124_g1_i1
21 XP_020909717.1 0.00770 0.50 Down		Chitotriosidase-1-like [Exaiptasia pallida]				unidentified
22 XP_020621878.1 0.00120 0.50 Down		Filamin-A-like isoform X1 [Orbicella faveolata]				c31886_g1_i1
23 XP_020909935.1 0.01000 0.50 Down		Transaldolase-like [Exaiptasia pallida]				c21742_g1_i1
24 XP_020917618.1 0.00670 0.50 Down		78 kDa glucose-regulated protein-like [Exaiptasia pallida]				c23602_g1_i1
25 XP_020894746.1 0.00600 0.50 Down		Gelsolin-like protein 1, partial [Exaiptasia pallida]				c29531_g1_i1
26 XP_020600429.1 0.00360 0.60 Down		Actin, cytoplasmic [Orbicella faveolata]				c30882_g1_i1
27 XP_020600465.1 0.02400 0.70 Down		Actin, cytoplasmic-like [Orbicella faveolata]				c30882_g1_i1
28 XP_020912686.1 0.00150 1.50 Up		Prostasin-like [Exaiptasia pallida]				c26944_g1_i1
29 XP_020915468.1 0.00120 1.50 Up		Triosephosphate isomerase-like [Exaiptasia pallida]				c13561_g1_i1
30 XP_001638581.1 0.01800 1.80 Up		Calmodulin beta. predicted protein [Nematostella vectensis]				c18884_g1_i1
31 XP_020893814.1 0.01300 2.00 Up		PDZ and LIM domain protein 7-like isoform X2 [Exaiptasia pallida]				c26413_g1_i1
32 XP_020908549.1 0.01900 2.00 Up		Gelsolin-like protein 1 isoform X1 [Exaiptasia pallida]				c22668_g1_i1
33 XP_020896073.1 0.00022 2.10 Up		Filamin-A-like [Exaiptasia pallida]				c31886_g1_i1
34 XP_020893048.1 0.00011 2.20 Up		Titin-like [Exaiptasia pallida]				unidentified
35 XP_020893763.1 0.00710 2.30 Up		Fructose-bisphosphate aldolase C-like [Exaiptasia pallida]				c26015_g1_i1
36 XP_020917834.1 0.00083 2.30 Up		Peroxiredoxin-2-like isoform X1 [Exaiptasia pallida]				c23742_g1_i2
37 XP_020909259.1 0.00270 2.80 Up		Ribokinase-like [Exaiptasia pallida]				c28955_g1_i1
38 XP_001632230.1 0.02400 2.80 Up		Ras-related protein Rab1A. predicted protein [Nematostella vectensis]				c23411_g1_i1
39 XP_020897889.1 0.00220 3.50 Up		ALK tyrosine kinase receptor				c28511_g1_i1
40 XP_020893608.1 0.00010 3.80 Up		Ubiquitin-conjugating enzyme E2 L3-like [Exaiptasia pallida]				c17550_g1_i1
41 XP_020898735.1 0.01500 4.60 Up		Spectrin beta chain-like isoform X1 [Exaiptasia pallida]				c32124_g1_i2
42 XP_020909341.1 0.02200 5.00 Up		Peptidyl-prolyl cis-trans isomerase FKBP2-like [Exaiptasia pallida]				c36785_g1_i1
43 XP_020895630.1 0.00010 5.50 Up		Superoxide dismutase [Cu-Zn]-like [Exaiptasia pallida]				c31850_g1_i1
44 XP_020893090.1 0.01800 5.70 Up		EGF and laminin G domain-containing protein-like [Exaiptasia pallida]				c31850_g1_i1
45 XP_020908985.1 0.02000 5.80 Up		Dihydropteridine reductase-like [Exaiptasia pallida]				unidentified
46 XP_020893863.1 0.00780 7.70 Up		Catalase-like [Exaiptasia pallida]				unidentified
47 XP_020915341.1 0.00054 10.00 Up		Calmodulin-like isoform X2 [Exaiptasia pallida]				c13463_g1_i1
48 XP_020904785.1 0.00170 11.00 Up		Peptidyl-prolyl cis-trans isomerase B-like [Exaiptasia pallida]				c18453_g1_i1
49 XP_020895378.1 0.01700 12.00 Up		Protein DJ-1-like [Exaiptasia pallida]				unidentified
50 XP_020895514.1 0.00073 18.00 Up		Probable protein disulfide-isomerase A6 [Exaiptasia pallida]				unidentified
51 XP_020895143.1 0.00029 25.00 Up		Major antigen-like [Exaiptasia pallida]				unidentified
52 XP_020900581.1 0.31000 0.20 N0		Isochorismatase domain-containing protein 2				c25037_g1_i1
53 XP_020612680.1 0.08200 0.30 N0		Beta-hexosaminidase subunit beta-like				c30952_g1_i1
54 XP_020914260.1 0.13000 0.30 N0		Peroxiredoxin-4-like				c20800_g1_i1
55 XP_020898511.1 0.07500 0.40 N0		Tyrosine-protein phosphatase non-receptor type 11-like				c29926_g1_i1
56 XP_020897599.1 0.08100 0.40 N0		beta-hexosaminidase subunit beta-like				c30952_g1_i1
57 XP_020917426.1 0.04100 0.40 Down		Heat shock cognate 71 kDa protein-like [Exaiptasia pallida]				c27026_g1_i1
58 XP_020895566.1 (+1) 0.46000 0.50 N0		Drebrin-like protein isoform X1				c30729_g1_i1
59 XP_020908604.1 0.08600 0.50 N0		Catenin delta 2. uncharacterized protein LOC110246590				c31592_g1_i1
60 XP_001637976.1 (+4) 0.28000 0.60 N0		Gamma aminobutyric acid receptor-associates protein like 2				c30000_g2_i1
61 XP_020896864.1 0.10000 0.60 N0		Programmed cell death 6-interacting protein-like				c29983_g1_i1
62 XP_001626713.1 0.03300 0.60 Down		Peptidyl-prolyl cis-rans isomerase B-like.predicted protein [Nematostella vectensis]				c10977_g1_i1
63 XP_020909070.1 0.09700 0.70 N0		talin-2-like				c32098_g1_i1
64 XP_020913308.1 0.56000 0.70 N0		Laminin subunit alpha-like				unidentified
65 XP_020917237.1 0.27000 0.80 N0		Myosin-2 essential light chain-like				c17273_g1_i1
66 XP_020904938.1 0.61000 0.80 N0		Spectrin alpha chain, non-erythrocytic 1-like				c32142_g1_i1
67 XP_001624503.1 (+6) 0.45000 0.80 N0		Polyubiquitin C. predicted protein				c11211_g1_i1
68 XP_020892827.1 (+3) 0.55000 0.90 N0		Disks large homolog 1-like isoform X1				c29719_g1_i1
69 XP_020902240.1 0.66000 0.90 N0		Chitinase-3-like protein 1				unidentified
70 XP_020913610.1 0.88000 1.00 N0		Glutaredoxin-3-like				c8468_g1_i1
71 XP_020892500.1 0.87000 1.00 N0		Vinculin-like				c30299_g1_i1
72 XP_020907141.1 0.91000 1.00 N0		Ras-related protein Rab-7a				c20951_g1_i1
73 XP_020900534.1 0.85000 1.00 N0		Protein disulfide-isomerase 2-like				c27447_g1_i1
74 XP_020605066.1 0.90000 1.00 N0		Gelsolin-like protein 1				c22668_g1_i1
75 XP_020909112.1 0.94000 1.10 N0		Ornithine aminotransferase, mitochondrial-like [Exaiptasia pallida]				unidentified
76 XP_001636825.1 0.18000 1.10 N0		Puromycin-sensitive aminopeptidase				unidentified
77 XP_020899312.1 (+1) 0.91000 1.10 N0		Lethal(2) giant larvae protein homolog 1-like isoform X1				c30500_g1_i1
78 XP_020893232.1 0.74000 1.10 N0		Golgi reassembly-stacking protein 2-like				c22821_g1_i1
79 XP_020902588.1 0.88000 1.10 N0		Serpin B6-like				c26903_g1_i1
80 XP_020903118.1 0.62000 1.20 N0		Elongation factor 2-like				c26671_g1_i1
81 XP_020911078.1 0.69000 1.20 N0		Catenin alpha-2-like				c31918_g1_i1
82 XP_020892660.1 0.03300 1.20 Up		Protein CutA homolog [Exaiptasia pallida]				c25877_g1_i1
83 XP_020906641.1 0.62000 1.20 N0		Cytochrome c				c25315_g1_i1
84 XP_020909636.1 0.70000 1.20 N0		AP-1 complex subunit beta-1-like				c30283_g1_i1
85 XP_020895547.1 0.62000 1.30 N0		Alpha-adducin-like				c30609_g1_i1
86 XP_020891895.1 0.60000 1.30 N0		Sorting nexin-6-like				c29834_g1_i1
87 XP_020903965.1 0.51000 1.50 N0		Glutathione S-transferase Mu 3-like				c27898_g1_i1
88 XP_020896508.1 0.37000 1.50 N0		Puromycin-sensitive aminopeptidase-like				c31007_g1_i1
89 XP_020605062.1 0.03500 1.60 Up		Gelsolin-like protein 1 [Orbicella faveolata]				c10141_g1_i1
90 XP_020893050.1 0.17000 1.60 N0		Death-associated protein kinase 3-like				c14394_g1_i1
91 XP_020900069.1 0.07700 1.70 N0		Protocadherin-like protein				unidentified
92 XP_020902867.1 0.09300 1.80 N0		Protein singed-like				c30379_g1_i2
93 XP_020893734.1 0.27000 1.80 N0		Neurocalcin homolog				c21860_g1_i1
94 XP_020896800.1 (+4) 0.48000 1.80 N0		Histone H2B-like				unidentified
95 XP_020901988.1 0.44000 1.90 N0		Thioredoxin domain-containing protein 3 homolog				c23425_g1_i1
96 XP_020898439.1 (+1) 0.24000 1.90 N0		F-actin-capping protein subunit beta-like isoform X1				c31719_g2_i1
97 XP_020901361.1 (+1) 0.12000 2.00 N0		Myosin heavy chain, striated muscle-like isoform X1				c28414_g1_i2
98 XP_020900767.1 0.10000 2.00 N0		Radixin-like				c30582_g1_i3
99 XP_020916259.1 0.53000 2.10 N0		Allograft inflammatory factor 1-like				unidentified
100 XP_020900968.1 0.03600 2.10 Up		Calreticulin-like [Exaiptasia pallida]				c23438_g1_i1
101 XP_020909182.1 0.22000 2.10 N0		Glutamyl aminopeptidase-like isoform X1				c32035_g1_i1
102 XP_020912038.1 0.05600 2.30 N0		Protein disulfide-isomerase like 2-1-like				unidentified
103 XP_001631110.1 0.04700 2.40 Up		Ras-related protein Rap-1b				c31585_g1_i1
104 XP_020892835.1 0.04300 2.50 Up		Superoxide dismutase [Mn], mitochondrial-like [Exaiptasia pallida]				c27625_g1_i1
105 XP_020914889.1 (+1) 0.37000 2.70 N0		Unconventional myosin-XVIIIa-like isoform X1				unidentified
106 XP_020899677.1 0.05700 2.90 N0		Citrate synthase, mitochondrial-like				unidentified
107 XP_001641545.1 0.20000 3.10 N0		Ras-related protein Rab-5C				unidentified
108 XP_020893771.1 0.03200 3.40 Up		Ribonuclease UK114-like [Exaiptasia pallida]				unidentified
109 XP_020908668.1 0.09500 3.90 N0		Lipoxygenase homology domain-containing protein 1-like isoform X1				unidentified
110 XP_020913561.1 0.13000 4.20 N0		Expansin like 1 isoform X2				unidentified
111 XP_020907283.1 0.12000 5.40 N0		Endoplasmin-like				unidentified
112 XP_020916906.1 0.05300 7.40 N0		Adenylate kinase-like				c23200_g1_i1
